# Supplementary material for: Cross-tissue correlations of genome-wide DNA methylation in Japanese live human brain and blood, saliva, and buccal epithelial tissues
Source: Transl Psychiatry. 2023 Feb 27;13:72. doi: 10.1038/s41398-023-02370-0 (PMC9968710; doi:10.1038/s41398-023-02370-0)
Supplement: Supplementary file 2 — Supplementary Table S2 [file 41398_2023_2370_MOESM2_ESM.xlsx]

## Sheet: Brain
	neuron
205111140031_R01C01	0.222813
205111140031_R05C01	0.363096
205111140071_R01C01	0.31475
205111140071_R05C01	0.444207
205111140070_R05C01	0.448242
205111140072_R01C01	0.418257
205111140072_R06C01	0.265473
205111140117_R01C01	0.328089
205111140117_R05C01	0.456961
205751520020_R04C01	0.314397
205751520020_R08C01	0.151531
205751520021_R04C01	0.257918
205751520021_R08C01	0.463084
205751520063_R04C01	0.0789785
205751520063_R08C01	0.0736081
205751520065_R04C01	0.45863
205751520065_R08C01	0.518371
205751520078_R04C01	0.412782
205751520078_R08C01	0.208274

## Sheet: Blood
	Epi	Fib	B	NK	CD4T	CD8T	Mono	Neutro	Eosino
205111140031_R02C01	0.0128002	0	0.0282668	0.0148572	0.0892113	0	0.0902336	0.764631	0
205111140031_R06C01	0.00747048	0.0069015	0.0319504	0.0349419	0.148376	0.0146627	0.0321116	0.723586	0
205111140071_R02C01	0.00976944	0.00312423	0.0122158	0.013802	0.170357	0.0181832	0.0622677	0.710281	0
205111140071_R06C01	0.0112597	0.00355158	0	0	0	0	0.000399107	0.98479	0
205111140070_R06C01	0.00966508	0.00375268	0.0215818	0.0155847	0.0378423	0.018804	0.0330665	0.859703	0
205111140072_R02C01	0.00568237	0.00209341	0.0848387	0.125926	0.0775783	0.0399368	0.07344	0.590504	0
205111140072_R05C01	0.00488146	0	0.0507595	0.177284	0.0790176	0.0623624	0.0741116	0.543253	0.00833099
205111140117_R02C01	0.0054566	0.00339693	0.0495984	0.0804417	0.127901	0.0742977	0.0507481	0.608159	0
205111140117_R06C01	0.0104629	0.00323776	0.0583656	0.0485258	0.158784	0.0331018	0.0438694	0.643653	0
205751520020_R03C01	0.0110704	0.00200036	0.0325904	0.0449451	0.0837388	0	0.024483	0.801172	0
205751520020_R07C01	0.0138621	0.00353882	0.00863964	0.0248885	0.0334392	0.00944334	0.0957649	0.810423	0
205751520021_R03C01	0.0125901	0	0.000393626	0.0120135	0.00554834	0	0.00135986	0.968095	0
205751520021_R07C01	0.0119633	0	0.00167989	0.0246879	0.0184122	0	0.00778051	0.935476	0
205751520063_R03C01	0.0115533	0.00166037	0.0326705	0	0.0401079	0.0614273	0.0382733	0.814307	0
205751520063_R07C01	0.00899493	0.000342067	0.0308429	0.0422109	0.169371	0.00878156	0.0316757	0.707781	0
205751520065_R03C01	0.0128911	0	0.0236201	0.0362983	0.0514855	0.0391715	0.025073	0.811461	0
205751520065_R07C01	0.0169551	0	0	0	0.0286367	0	0.0317384	0.92267	0
205751520078_R03C01	0.00723809	0.00369766	0.0260555	0.0267279	0.0592672	0.0127018	0.0686324	0.795679	0
205751520078_R07C01	0.0117578	0.0031354	0.047486	0.0523467	0.154511	0.0622923	0.0742596	0.594211	0

## Sheet: Saliva
	Epi	Fib	B	NK	CD4T	CD8T	Mono	Neutro	Eosino
205111140031_R03C01	0.400569	0	0.031762	0.0390921	0.0204699	0	0.0576526	0.450454	0
205111140031_R07C01	0.498721	0	0.0412373	0.0463434	0.0249954	0	0.0460351	0.342668	0
205111140071_R03C01	0.126433	0.0244627	0	0.0102658	0.00166617	0	0	0.837172	0
205111140071_R07C01	0.420291	0.000864628	0.0283605	0.0423314	0.0248009	0	0.0462453	0.437107	0
205111140070_R07C01	0.252393	0.0220551	0.0154509	0.0220226	0.004651	0	0.0215962	0.661831	0
205111140072_R03C01	0.088513	0.0192406	0	0	0	0	0.0076896	0.884557	0
205111140072_R07C01	0.491536	0	0.0314848	0.0356018	0.0238888	0	0.0338166	0.383672	0
205111140117_R03C01	0.0429634	0.0123344	0	0	0	0	0	0.944702	0
205111140117_R07C01	0.983538	0	0.0031016	0.00365415	0.00222983	0	0.0043105	0.00264806	0.00051788
205751520020_R02C01	0.482603	0.00108337	0.0404287	0.0422735	0.0204237	0	0.0518501	0.361338	0
205751520020_R06C01	0.271834	0.00365413	0.0157432	0.0229902	0.0134609	0	0.027159	0.645158	0
205751520021_R02C01	0.256515	0.0228117	0.0219582	0.0235827	0.00594448	0	0.0398929	0.629295	0
205751520021_R06C01	0.353585	0.00839313	0.035898	0.0372962	0.0210406	0	0.0398393	0.503948	0
205751520063_R02C01	0.349811	0.0100316	0.0323339	0.0347659	0.0176953	0	0.0260043	0.529358	0
205751520063_R06C01	0.927467	0	0.0134817	0.0149199	0.0100396	0	0.0168033	0.0159063	0.00138252
205751520065_R02C01	0.0432385	0.0113516	0	0	0	0	0	0.94541	0
205751520065_R06C01	0.370293	0.00397584	0.0230899	0.0254825	0.0130305	0	0.0430653	0.521063	0
205751520078_R02C01	0.135636	0.0195919	0.00228679	0.0150159	0.00289883	0	0.0109303	0.813641	0
205751520078_R06C01	0.0464709	0.0125684	0	0	0	0	0.00483723	0.936123	0

## Sheet: Buccal
	Epi	Fib	B	NK	CD4T	CD8T	Mono	Neutro	Eosino
205111140031_R04C01	0.918033	0	0.0147531	0.0174233	0.0107234	0	0.0164494	0.0207158	0.00190193
205111140031_R08C01	0.881743	0	0.0188843	0.0226495	0.0150962	0	0.0260951	0.0289389	0.00659324
205111140071_R04C01	0.69889	0	0.0354576	0.0412809	0.0206773	0	0.0534962	0.149464	0.000734564
205111140071_R08C01	0.931814	0	0.0118225	0.0159582	0.00969258	0	0.0141135	0.0142953	0.00230389
205111140070_R08C01	0.670971	0	0.0385227	0.0445849	0.0248683	0	0.0513326	0.16972	0
205111140072_R04C01	0.274747	0.0280906	0.015932	0.029144	0.0119915	0	0.0537169	0.586377	0
205111140072_R08C01	0.81296	0	0.029091	0.0329392	0.0196937	0	0.0331984	0.0703907	0.00172651
205111140117_R04C01	0.512564	0	0.028846	0.0400312	0.0214986	0	0.0408447	0.356215	0
205111140117_R08C01	0.99481	0	0.000991599	0.00128616	0.000724289	0	0.00123677	0.000658614	0.000292653
205751520020_R01C01	0.42816	0	0.034862	0.033838	0.0125201	0	0.0405736	0.450047	0
205751520020_R05C01	0.566338	0	0.0392107	0.0463454	0.0277678	0	0.0553751	0.264963	0
205751520021_R01C01	0.813802	0	0.0308673	0.0372683	0.0254195	0	0.03385	0.0531138	0.00567935
205751520021_R05C01	0.984559	0	0.00289116	0.00368498	0.00288396	0	0.00310771	0.00223035	0.000642685
205751520063_R01C01	0.552249	0.00022197	0.0361137	0.0445675	0.0219023	0	0.0470706	0.297875	0
205751520063_R05C01	1	0	0	0	0	0	0	0	0
205751520065_R01C01	0.140975	0.0336074	0.00484054	0.00297909	0	0	0	0.817598	0
205751520065_R05C01	0.871565	0	0.022789	0.0248439	0.0171259	0	0.0241252	0.03661	0.00294084
205751520078_R01C01	0.898779	0	0.0184242	0.0206156	0.0150883	0	0.0193866	0.0235966	0.00410949
205751520078_R05C01	0.648286	0	0.0438061	0.0510056	0.0306558	0	0.0451809	0.181066	0
