# Supplementary material for: Cross-tissue correlations of genome-wide DNA methylation in Japanese live human brain and blood, saliva, and buccal epithelial tissues
Source: Transl Psychiatry. 2023 Feb 27;13:72. doi: 10.1038/s41398-023-02370-0 (PMC9968710; doi:10.1038/s41398-023-02370-0)
Supplement: Supplementary file 3 — Supplementary Table S4 [file 41398_2023_2370_MOESM3_ESM.xlsx]

## Sheet: BRvsBL_BH
Supplementary Table S4. Characteristics of the CpGs that surpassed the Benjamini-Hochberg level of significance for the degree of correlation between brain and peripheral tissues.
	chr	MAPINFO	Gene_Name	rho_brain_blood	p_rho_brain_blood	rho_brain_blood_adj	p_rho_brain_blood_adj	SNP_flag	mQTL_flag	BH
cg00002426	3	57743543	SLMAP	0.835088	0	0.466667	0.0456439	FALSE	FALSE	0
cg00004073	2	237027592	AGAP1;AGAP1	0.891228	0	0.352632	0.139019	TRUE	FALSE	0
cg00006815	X	103810908	IL1RAPL2	0.878947	0	0.857895	0	FALSE	FALSE	0
cg00011200	X	48380234	EBP;EBP	0.87193	0	0.807018	3.46999e-05	TRUE	FALSE	0
cg00016625	16	33935639		0.838596	0	0.563158	0.0134589	FALSE	FALSE	0
cg00016802	6	7339455	CAGE1;CAGE1;CAGE1	0.892982	0	0.680702	0.00179245	FALSE	FALSE	0
cg00017004	X	152040289		0.885965	0	0.687719	0.00154617	FALSE	FALSE	0
cg00018261	X	117957689	ZCCHC12	0.905263	0	0.761404	0.000232117	TRUE	FALSE	0
cg00023415	X	48435152	RBM3	0.842105	0	0.715789	0.000817526	FALSE	FALSE	0
cg00033213	8	144399335	TOP1MT	0.884211	0	0.582456	0.0101341	TRUE	FALSE	0
cg00035237	1	31538879	PUM1;PUM1	0.838596	0	0.45614	0.0512663	FALSE	FALSE	0
cg00039385	19	4558558	SEMA6B	0.896491	0	0.621053	0.0054697	FALSE	FALSE	0
cg00044050	16	11439710	C16orf75	0.908772	0	0.65614	0.00291815	FALSE	TRUE	0
cg00045070	1	55504649	PCSK9	0.901754	0	0.731579	0.000549219	TRUE	FALSE	0
cg00046977	11	60524478	MS4A15;MS4A15;MS4A15;MS4A15;MS4A15;MS4A15;MS4A15	0.885965	0	0.452632	0.0532552	FALSE	FALSE	0
cg00048823	14	20923261	OSGEP;OSGEP;APEX1;APEX1;APEX1;APEX1	0.840351	0	0.519298	0.0243438	FALSE	FALSE	0
cg00049323	5	472564	LOC25845	0.840351	0	0.692982	0.00138008	FALSE	TRUE	0
cg00055165	X	47004968	RBM10;RBM10;RBM10;RBM10;NDUFB11;NDUFB11;RBM10	0.889474	0	0.901754	0	TRUE	FALSE	0
cg00059162	X	22154251	PHEX;PHEX	0.847368	0	0.733333	0.000524361	FALSE	FALSE	0
cg00063477	Y	22741795	EIF1AY	0.868421	0	0.715789	0.000817526	FALSE	TRUE	0
cg00079477	12	57780204		0.898246	0	0.661404	0.00263834	FALSE	TRUE	0
cg00079563	22	43253521	ARFGAP3;ARFGAP3	0.907018	0	0.545614	0.0172008	FALSE	FALSE	0
cg00087182	22	24302043	GSTT2B;GSTT2	0.877193	0	0.854386	0	FALSE	TRUE	0
cg00087746	12	64080144		0.877193	0	0.710526	0.000927047	FALSE	FALSE	0
cg00096071	X	77396435	TAF9B	0.857895	0	0.578947	0.0106827	FALSE	FALSE	0
cg00099616	X	100646545	RPL36A;RPL36A;RPL36A-HNRNPH2;RPL36A-HNRNPH2;RPL36A;BTK;RPL36A;RPL36A-HNRNPH2;RPL36A-HNRNPH2	0.866667	0	0.805263	3.84027e-05	FALSE	FALSE	0
cg00101154	16	420108	MRPL28	0.868421	0	0.426316	0.0701356	FALSE	TRUE	0
cg00101453	22	30685584	GATSL3;GATSL3	0.884211	0	0.521053	0.023804	FALSE	FALSE	0
cg00105470	1	228290868	C1orf35	0.889474	0	0.803509	4.23294e-05	FALSE	FALSE	0
cg00108056	X	153627317	RPL10;RPL10;SNORA70	0.840351	0	0.861404	0	FALSE	FALSE	0
cg00113623	X	153640221	TAZ;TAZ;DNASE1L1;DNASE1L1;TAZ;TAZ;DNASE1L1;TAZ	0.891228	0	0.729825	0.000574995	TRUE	FALSE	0
cg00114625	X	24483478	PDK3;PDK3;PDK3;PDK3	0.9	0	0.808772	3.12119e-05	TRUE	FALSE	0
cg00115167	14	21397486		0.889474	0	0.659649	0.00272906	FALSE	FALSE	0
cg00116709	X	49020091	MAGIX;MAGIX;MAGIX;MAGIX	0.842105	0	0.738596	0.000455042	TRUE	FALSE	0
cg00125893	15	71747687	THSD4	0.857895	0	0.587719	0.00935427	TRUE	FALSE	0
cg00138712	10	15001407	MEIG1	0.884211	0	0.778947	0.000126481	FALSE	FALSE	0
cg00142683	X	118708623	UBE2A;UBE2A;UBE2A;UBE2A	0.852632	0	0.77193	0.000163189	FALSE	FALSE	0
cg00144942	2	241119882		0.885965	0	0.57193	0.0118526	TRUE	FALSE	0
cg00145284	1	58852326		0.882456	0	0.714035	0.000852816	FALSE	FALSE	0
cg00145838	17	73729676	ITGB4;ITGB4;ITGB4	0.842105	0	0.678947	0.00185874	FALSE	FALSE	0
cg00146240	15	62899159		0.887719	0	0.747368	0.000355578	TRUE	FALSE	0
cg00146996	5	25120424		0.861404	0	0.436842	0.0629538	FALSE	FALSE	0
cg00148935	3	16398839	RFTN1	0.838596	0	0.570175	0.0121607	FALSE	FALSE	0
cg00149473	10	94459330		0.847368	0	0.626316	0.00500009	FALSE	FALSE	0
cg00151744	15	85891516		0.835088	0	0.77193	0.000163189	TRUE	FALSE	0
cg00154950	8	3974030	CSMD1	0.882456	0	0.808772	3.12119e-05	FALSE	TRUE	0
cg00157456	16	72042372	DHODH	0.842105	0	0.696491	0.0012776	FALSE	FALSE	0
cg00160777	16	23764590	CHP2	0.852632	0	0.863158	0	FALSE	TRUE	0
cg00166213	5	53606452	ARL15	0.835088	0	0.617544	0.00580234	FALSE	FALSE	0
cg00172408	1	111991531	WDR77;ATP5F1	0.838596	0	0.626316	0.00500009	FALSE	FALSE	0
cg00173776	1	31465032	PUM1;PUM1	0.842105	0	0.308772	0.197925	FALSE	FALSE	0
cg00177631	9	67926401	ANKRD20A1;ANKRD20A3	0.852632	0	0.826316	6.37252e-06	FALSE	FALSE	0
cg00179446	X	118986947	UPF3B;UPF3B;UPF3B;UPF3B	0.864912	0	0.835088	0	TRUE	FALSE	0
cg00179598	X	38078359	SRPX;SRPX;SRPX;SRPX	0.912281	0	0.792982	7.1125e-05	FALSE	FALSE	0
cg00191696	12	110318174	GLTP	0.849123	0	0.515789	0.0254528	FALSE	FALSE	0
cg00191758	X	55478814	MAGEH1	0.84386	0	0.835088	0	TRUE	FALSE	0
cg00192980	X	77394971	TAF9B	0.877193	0	0.835088	0	TRUE	FALSE	0
cg00209612	4	6665199		0.838596	0	0.696491	0.0012776	TRUE	FALSE	0
cg00213748	Y	8148233		0.835088	0	0.749123	0.000337889	FALSE	TRUE	0
cg00213853	X	154034091	MPP1;MPP1;MPP1;MPP1	0.84386	0	0.842105	0	TRUE	FALSE	0
cg00214611	Y	15815688	TMSB4Y;TMSB4Y	0.84386	0	0.705263	0.00104802	TRUE	TRUE	0
cg00216997	X	48980153	GPKOW	0.835088	0	0.82807	4.73137e-06	TRUE	FALSE	0
cg00218628	12	31255279	DDX11;DDX11;DDX11	0.884211	0	0.578947	0.0106827	TRUE	FALSE	0
cg00223135	15	43799245	TP53BP1	0.842105	0	0.698246	0.00122872	FALSE	FALSE	0
cg00230685	X	17755839	SCML1;SCML1;SCML1;SCML1	0.877193	0	0.731579	0.000549219	TRUE	FALSE	0
cg00237026	5	10065651		0.835088	0	0.677193	0.00192701	FALSE	FALSE	0
cg00238131	X	71527298	CITED1;CITED1	0.898246	0	0.894737	0	FALSE	FALSE	0
cg00244920	3	129116393	RPL32P3;SNORA7B	0.884211	0	0.614035	0.00615134	FALSE	FALSE	0
cg00247094	17	77922972	TBC1D16	0.894737	0	0.694737	0.00132804	TRUE	FALSE	0
cg00255219	X	135991858		0.835088	0	0.85614	0	FALSE	FALSE	0
cg00255921	9	91933654	SECISBP2;SECISBP2;SECISBP2;SECISBP2	0.842105	0	0.580702	0.0104055	FALSE	FALSE	0
cg00257659	1	209800214	LAMB3;LAMB3;LAMB3	0.859649	0	0.707018	0.00100637	FALSE	FALSE	0
cg00257704	17	77903985		0.857895	0	0.508772	0.0277917	FALSE	FALSE	0
cg00260888	20	30865478	KIF3B;KIF3B	0.868421	0	0.614035	0.00615134	FALSE	FALSE	0
cg00270141	2	466826		0.847368	0	0.736842	0.000477298	FALSE	FALSE	0
cg00270799	8	8580453		0.880702	0	0.417544	0.0765833	FALSE	FALSE	0
cg00279662	5	54989614	SLC38A9;SLC38A9;SLC38A9;SLC38A9;SLC38A9	0.859649	0	0.810526	2.79303e-05	FALSE	FALSE	0
cg00292331	20	30017947	DEFB122	0.849123	0	0.542105	0.0180412	FALSE	FALSE	0
cg00294814	10	94734881	EXOC6;EXOC6	0.875439	0	0.536842	0.0193634	FALSE	FALSE	0
cg00301601	21	30397148	USP16;USP16;USP16	0.850877	0	0.663158	0.0025501	FALSE	FALSE	0
cg00308659	16	84871952	CRISPLD2	0.847368	0	0.542105	0.0180412	FALSE	FALSE	0
cg00309178	1	242011396	EXO1;EXO1;EXO1	0.870175	0	0.608772	0.00670683	FALSE	FALSE	0
cg00312000	17	3482290	TRPV1;TRPV1;TRPV1;TRPV1	0.838596	0	0.649123	0.00332846	FALSE	FALSE	0
cg00318166	4	190230730		0.873684	0	0.694737	0.00132804	TRUE	FALSE	0
cg00321709	10	135341933	CYP2E1	0.877193	0	0.449123	0.0553032	FALSE	FALSE	0
cg00328582	X	102000756	BHLHB9;BHLHB9;BHLHB9;BHLHB9;BHLHB9;BHLHB9;BHLHB9;BHLHB9	0.842105	0	0.7	0.00118136	FALSE	FALSE	0
cg00331845	10	134942441	GPR123	0.849123	0	0.396491	0.0938809	FALSE	FALSE	0
cg00334820	16	20817669	ERI2;LOC81691;LOC81691;ERI2	0.87193	0	0.689474	0.0014891	FALSE	FALSE	0
cg00337921	X	129091288		0.912281	0	0.822807	1.006e-05	TRUE	FALSE	0
cg00339240	6	47455902	CD2AP	0.842105	0	0.75614	0.000273778	FALSE	FALSE	0
cg00345083	1	4725584	AJAP1;AJAP1	0.903509	0	0.552632	0.0156147	TRUE	FALSE	0
cg00347850	X	46696907	RP2	0.907018	0	0.84386	0	TRUE	FALSE	0
cg00350441	16	57220262	FAM192A;RSPRY1;RSPRY1	0.852632	0	0.796491	6.04628e-05	FALSE	FALSE	0
cg00353422	21	34863790	DNAJC28;DNAJC28	0.850877	0	0.629825	0.00470573	FALSE	FALSE	0
cg00356769	7	23455115	IGF2BP3	0.873684	0	0.677193	0.00192701	FALSE	FALSE	0
cg00357002	21	38445514	PIGP;TTC3;PIGP;PIGP	0.873684	0	0.822807	1.006e-05	FALSE	FALSE	0
cg00359973	X	53449900	RIBC1;RIBC1;RIBC1;RIBC1;SMC1A	0.838596	0	0.689474	0.0014891	FALSE	FALSE	0
cg00360365	X	54556536	GNL3L	0.898246	0	0.707018	0.00100637	FALSE	FALSE	0
cg00360402	X	53393814		0.845614	0	0.821053	1.21192e-05	FALSE	FALSE	0
cg00369151	10	23002323	PIP4K2A	0.894737	0	0.780702	0.000118322	FALSE	TRUE	0
cg00374333	2	224702156	AP1S3	0.85614	0	0.787719	8.93533e-05	FALSE	FALSE	0
cg00375105	X	153625785	RPL10;RPL10	0.864912	0	0.74386	0.000393093	FALSE	FALSE	0
cg00379799	X	12154656		0.84386	0	0.47193	0.0430195	FALSE	FALSE	0
cg00386984	1	2249617		0.835088	0	0.745614	0.000373971	FALSE	FALSE	0
cg00387872	6	25731330		0.891228	0	0.773684	0.000153372	FALSE	TRUE	0
cg00399450	X	73834086	RLIM;RLIM	0.845614	0	0.789474	8.29641e-05	TRUE	FALSE	0
cg00400999	X	101410998	BEX5;BEX5	0.884211	0	0.854386	0	FALSE	FALSE	0
cg00408231	X	100807848	ARMCX1	0.842105	0	0.835088	0	FALSE	FALSE	0
cg00409480	X	38115655		0.836842	0	0.785965	9.60713e-05	FALSE	FALSE	0
cg00409995	2	240217983	HDAC4	0.854386	0	0.773684	0.000153372	TRUE	FALSE	0
cg00410883	19	1555145	MEX3D	0.891228	0	0.636842	0.00415945	FALSE	FALSE	0
cg00411544	2	74375128	BOLA3;BOLA3;BOLA3-AS1;BOLA3-AS1;BOLA3-AS1	0.908772	0	0.578947	0.0106827	FALSE	FALSE	0
cg00412239	19	5044006	KDM4B	0.882456	0	0.64386	0.00366614	FALSE	FALSE	0
cg00413030	7	158947138		0.840351	0	0.784211	0.00010313	FALSE	FALSE	0
cg00418284	7	50518148	FIGNL1;FIGNL1	0.882456	0	0.529825	0.0212465	FALSE	FALSE	0
cg00422909	2	113994578	PAX8-AS1;PAX8-AS1;PAX8;PAX8;PAX8;PAX8	0.891228	0	0.775439	0.000143992	FALSE	FALSE	0
cg00435168	X	49148501		0.9	0	0.761404	0.000232117	FALSE	FALSE	0
cg00439656	1	161024782	ARHGAP30;ARHGAP30;ARHGAP30;ARHGAP30	0.854386	0	0.736842	0.000477298	TRUE	FALSE	0
cg00440859	X	115028898	DANT2	0.84386	0	0.708772	0.000966054	FALSE	FALSE	0
cg00445137	X	38782755		0.840351	0	0.721053	0.000718586	FALSE	FALSE	0
cg00447632	1	935861	HES4;HES4	0.850877	0	0.692982	0.00138008	FALSE	TRUE	0
cg00448482	18	13726497	C18orf19;C18orf19;RNMT;C18orf19;C18orf19	0.842105	0	0.803509	4.23294e-05	FALSE	FALSE	0
cg00449068	6	107403532	BEND3	0.873684	0	0.735088	0.000500396	FALSE	FALSE	0
cg00455738	X	103498075	ESX1	0.9	0	0.810526	2.79303e-05	FALSE	FALSE	0
cg00455876	Y	9385539		0.835088	0	0.750877	0.000320886	FALSE	FALSE	0
cg00455892	2	132237968	TUBA3D	0.907018	0	0.675439	0.00199731	FALSE	FALSE	0
cg00456593	11	624781	MUPCDH;MUPCDH	0.852632	0	0.722807	0.000687814	FALSE	FALSE	0
cg00457234	3	50398640		0.835088	0	0.7	0.00118136	FALSE	FALSE	0
cg00458505	X	17393449	NHS	0.907018	0	0.731579	0.000549219	TRUE	FALSE	0
cg00463901	6	163752570		0.894737	0	0.770175	0.000173456	TRUE	FALSE	0
cg00466309	X	148622572	LOC100131434;CXorf40A;CXorf40A	0.908772	0	0.785965	9.60713e-05	TRUE	FALSE	0
cg00467151	17	139045	RPH3AL;RPH3AL;RPH3AL;RPH3AL	0.894737	0	0.719298	0.000750442	TRUE	FALSE	0
cg00474373	2	1625268		0.852632	0	0.714035	0.000852816	TRUE	FALSE	0
cg00478198	X	49644500	LOC158572;USP27X;USP27X	0.842105	0	0.785965	9.60713e-05	TRUE	FALSE	0
cg00484628	19	56739741	ZSCAN5A	0.854386	0	0.6	0.0077233	FALSE	FALSE	0
cg00487526	15	90818384		0.842105	0	0.678947	0.00185874	FALSE	TRUE	0
cg00488787	10	135050905	VENTX	0.838596	0	0.814035	2.19525e-05	FALSE	FALSE	0
cg00489541	21	35961334	RCAN1;RCAN1;RCAN1	0.887719	0	0.673684	0.00206967	FALSE	FALSE	0
cg00491963	11	57335356	UBE2L6;UBE2L6;UBE2L6	0.849123	0	0.687719	0.00154617	FALSE	FALSE	0
cg00492957	16	980633	LMF1	0.864912	0	0.67193	0.00214416	FALSE	FALSE	0
cg00502035	10	125751386		0.910526	0	0.684211	0.00166562	FALSE	TRUE	0
cg00504088	10	89102134	LOC728190;LOC439994	0.887719	0	0.484211	0.0373544	FALSE	FALSE	0
cg00506913	16	31471204	ARMC5;ARMC5;ARMC5;ARMC5	0.842105	0	0.819298	1.4331e-05	FALSE	FALSE	0
cg00507532	1	6453951	ACOT7	0.885965	0	0.796491	6.04628e-05	FALSE	FALSE	0
cg00507953	11	65513118		0.873684	0	0.622807	0.00530932	FALSE	FALSE	0
cg00509507	19	56028542	SSC5D	0.87193	0	0.67193	0.00214416	FALSE	FALSE	0
cg00510327	X	73835412	RLIM;RLIM	0.864912	0	0.475439	0.0413366	FALSE	FALSE	0
cg00517765	X	18707777	PPEF1;PPEF1;PPEF1	0.852632	0	0.664912	0.00246427	FALSE	FALSE	0
cg00520042	17	17480931	PEMT;PEMT;PEMT	0.835088	0	0.412281	0.0806616	FALSE	FALSE	0
cg00520626	2	89340817		0.861404	0	0.654386	0.00301662	FALSE	FALSE	0
cg00525833	1	31983220	LOC284551	0.849123	0	0.635088	0.00429089	FALSE	TRUE	0
cg00529027	X	151806225	GABRQ	0.859649	0	0.778947	0.000126481	FALSE	FALSE	0
cg00530568	5	135587383	TRPC7;TRPC7;TRPC7	0.868421	0	0.615789	0.00597476	FALSE	FALSE	0
cg00538420	X	107979988	IRS4	0.875439	0	0.824561	8.14662e-06	FALSE	FALSE	0
cg00545759	19	39833510	SAMD4B	0.847368	0	0.577193	0.010966	FALSE	FALSE	0
cg00546757	5	170845058		0.845614	0	0.775439	0.000143992	TRUE	FALSE	0
cg00547614	6	7107703	RREB1;RREB1;RREB1;RREB1	0.849123	0	0.659649	0.00272906	FALSE	FALSE	0
cg00547789	X	154493750	RAB39B;RAB39B	0.887719	0	0.803509	4.23294e-05	FALSE	FALSE	0
cg00553120	7	157129669	DNAJB6;DNAJB6	0.864912	0	0.510526	0.0271916	FALSE	FALSE	0
cg00556616	18	12098198	ANKRD62	0.850877	0	0.552632	0.0156147	FALSE	FALSE	0
cg00560671	13	21635735	LATS2	0.84386	0	0.580702	0.0104055	FALSE	FALSE	0
cg00566642	1	156825288	NTRK1;INSRR	0.868421	0	0.859649	0	FALSE	FALSE	0
cg00570635	2	65355269	RAB1A;RAB1A	0.847368	0	0.617544	0.00580234	TRUE	FALSE	0
cg00573550	7	149701920		0.850877	0	0.801754	4.64892e-05	FALSE	FALSE	0
cg00575088	19	17971045	RPL18AP3;RPL18A	0.842105	0	0.617544	0.00580234	FALSE	FALSE	0
cg00575851	X	134232238	NCRNA00087	0.894737	0	0.766667	0.000195408	TRUE	FALSE	0
cg00576301	13	36920965	SPG20;SPG20;SPG20;SPG20	0.854386	0	0.391228	0.0986274	FALSE	FALSE	0
cg00581583	X	49047791	SYP	0.870175	0	0.791228	7.68918e-05	TRUE	FALSE	0
cg00595291	X	48320458	SLC38A5	0.845614	0	0.508772	0.0277917	FALSE	FALSE	0
cg00597858	X	51636568	MAGED1;MAGED1;MAGED1	0.892982	0	0.877193	0	FALSE	FALSE	0
cg00598125	6	32555411	HLA-DRB1	0.898246	0	0.784211	0.00010313	TRUE	FALSE	0
cg00602930	6	158482610	SYNJ2;SYNJ2	0.903509	0	0.887719	0	TRUE	FALSE	0
cg00603717	13	46039090	COG3;COG3	0.852632	0	0.808772	3.12119e-05	FALSE	FALSE	0
cg00611399	11	61129585	CYB561A3;CYB561A3;CYB561A3;TMEM138;TMEM138;TMEM138;CYB561A3;CYB561A3;CYB561A3	0.861404	0	0.652632	0.0031178	FALSE	FALSE	0
cg00616572	16	10772249	TEKT5	0.838596	0	0.905263	0	TRUE	FALSE	0
cg00621925	X	152989492	BCAP31;BCAP31;ABCD1;BCAP31;BCAP31;BCAP31;BCAP31	0.866667	0	0.735088	0.000500396	FALSE	FALSE	0
cg00622384	X	118925635	RPL39	0.835088	0	0.745614	0.000373971	FALSE	FALSE	0
cg00630494	19	53194036	ZNF83;ZNF83;ZNF83;ZNF83;ZNF83	0.907018	0	0.408772	0.0834701	FALSE	FALSE	0
cg00631877	12	94640673	PLXNC1	0.905263	0	0.663158	0.0025501	TRUE	FALSE	0
cg00634642	X	129040194	UTP14A;UTP14A	0.845614	0	0.782456	0.000110543	TRUE	FALSE	0
cg00638631	21	39039777	KCNJ6	0.835088	0	0.273684	0.25586	FALSE	TRUE	0
cg00638769	22	38004556	GGA1;GGA1;GGA1;GGA1;GGA1;GGA1;GGA1	0.864912	0	0.657895	0.00282231	FALSE	FALSE	0
cg00647646	12	69633854	CPSF6	0.838596	0	0.494737	0.0329814	FALSE	FALSE	0
cg00649199	10	82119370	DYDC2	0.877193	0	0.482456	0.0381257	FALSE	FALSE	0
cg00651446	X	101380386	TCEAL2	0.889474	0	0.726316	0.000629407	TRUE	FALSE	0
cg00654814	17	74865068	MGAT5B;MGAT5B	0.859649	0	0.691228	0.00143375	FALSE	FALSE	0
cg00657529	6	31698687	CLIC1;DDAH2	0.87193	0	0.785965	9.60713e-05	FALSE	FALSE	0
cg00661222	13	52343378	DHRS12	0.884211	0	0.72807	0.000601715	FALSE	FALSE	0
cg00661861	10	46994017	GPRIN2	0.835088	0	0.654386	0.00301662	FALSE	FALSE	0
cg00662775	X	102840435	TCEAL4;TCEAL4;TCEAL4;TCEAL4;TCEAL4;TCEAL4;TCEAL4;TCEAL4;TCEAL4;TCEAL4;TCEAL4;TCEAL4;TCEAL4	0.861404	0	0.778947	0.000126481	FALSE	FALSE	0
cg00668442	16	2318234	RNPS1;RNPS1	0.852632	0	0.503509	0.0296556	FALSE	FALSE	0
cg00668937	10	134699597		0.866667	0	0.529825	0.0212465	FALSE	FALSE	0
cg00669212	10	99601099		0.896491	0	0.62807	0.00485109	FALSE	FALSE	0
cg00671229	X	154294345	CMC4;MTCP1;MTCP1	0.836842	0	0.708772	0.000966054	FALSE	FALSE	0
cg00673685	X	111699191	ZCCHC16	0.85614	0	0.722807	0.000687814	TRUE	FALSE	0
cg00675838	6	97285024	GPR63;GPR63	0.840351	0	0.747368	0.000355578	FALSE	FALSE	0
cg00677360	19	17392653	ANKLE1;ANKLE1;ANKLE1;ANKLE1;ANKLE1;ANKLE1	0.838596	0	0.605263	0.00709942	FALSE	FALSE	0
cg00680673	X	48815747	OTUD5;OTUD5;OTUD5;OTUD5	0.905263	0	0.792982	7.1125e-05	TRUE	FALSE	0
cg00682458	6	43139370	SRF;SRF	0.859649	0	0.503509	0.0296556	FALSE	FALSE	0
cg00686339	16	699775	WDR90	0.877193	0	0.710526	0.000927047	FALSE	FALSE	0
cg00687962	4	40266942		0.849123	0	0.740351	0.000433605	FALSE	FALSE	0
cg00691480	X	148713506	TMEM185A;TMEM185A;TMEM185A;TMEM185A;TMEM185A;TMEM185A;TMEM185A	0.866667	0	0.736842	0.000477298	TRUE	FALSE	0
cg00692892	X	150861833		0.845614	0	0.664912	0.00246427	FALSE	FALSE	0
cg00694040	18	76073021		0.840351	0	0.808772	3.12119e-05	TRUE	FALSE	0
cg00704143	X	20098857	MAP7D2;MAP7D2;MAP7D2;MAP7D2	0.847368	0	0.696491	0.0012776	FALSE	FALSE	0
cg00706755	X	63445884	ASB12	0.896491	0	0.657895	0.00282231	TRUE	FALSE	0
cg00708203	19	3740489	TJP3;TJP3	0.857895	0	0.408772	0.0834701	FALSE	FALSE	0
cg00718752	3	46643208		0.912281	0	0.829825	3.21707e-06	TRUE	FALSE	0
cg00719879	19	54728360	LILRB3;LILRB3	0.859649	0	0.715789	0.000817526	FALSE	FALSE	0
cg00729461	X	133371084	CCDC160;CCDC160	0.864912	0	0.782456	0.000110543	TRUE	FALSE	0
cg00730761	6	101113084	ASCC3	0.880702	0	0.745614	0.000373971	TRUE	FALSE	0
cg00735237	10	44398590		0.87193	0	0.642105	0.00378473	TRUE	FALSE	0
cg00735883	X	106567457		0.868421	0	0.680702	0.00179245	FALSE	FALSE	0
cg00738849	4	190906046	TUBB4Q	0.861404	0	0.754386	0.00028885	FALSE	TRUE	0
cg00739787	X	131157326	MST4;MST4;MST4;MST4;MST4	0.87193	0	0.796491	6.04628e-05	FALSE	FALSE	0
cg00745399	19	52839924	ZNF610;ZNF610;ZNF610	0.898246	0	0.733333	0.000524361	FALSE	TRUE	0
cg00762997	X	106299502		0.854386	0	0.629825	0.00470573	FALSE	FALSE	0
cg00764560	22	42016991	XRCC6;PPPDE2	0.908772	0	0.778947	0.000126481	FALSE	FALSE	0
cg00765885	X	101771142	TMSB15A	0.891228	0	0.75614	0.000273778	TRUE	FALSE	0
cg00767637	X	72223388	PABPC1L2B;PABPC1L2B	0.842105	0	0.729825	0.000574995	FALSE	FALSE	0
cg00769064	X	136650951	ZIC3	0.84386	0	0.8	5.08914e-05	FALSE	FALSE	0
cg00779763	X	47479114	SYN1;SYN1	0.894737	0	0.740351	0.000433605	TRUE	FALSE	0
cg00781978	X	40506067	CXorf38	0.870175	0	0.768421	0.000184191	FALSE	FALSE	0
cg00783759	4	128983441	LARP1B;LARP1B;LARP1B	0.835088	0	0.64386	0.00366614	FALSE	FALSE	0
cg00785783	3	112280577	ATG3;SLC35A5	0.889474	0	0.549123	0.0163922	FALSE	FALSE	0
cg00785877	X	110513957	CAPN6	0.875439	0	0.668421	0.00229968	FALSE	FALSE	0
cg00790055	1	8716608	RERE;RERE	0.854386	0	0.633333	0.0044257	FALSE	FALSE	0
cg00803865	15	21937575	LOC646214	0.838596	0	0.552632	0.0156147	FALSE	FALSE	0
cg00807131	X	134053228		0.852632	0	0.650877	0.00322172	FALSE	FALSE	0
cg00812502	22	19109875	DGCR2;DGCR2	0.885965	0	0.629825	0.00470573	FALSE	FALSE	0
cg00814218	14	37445440	SLC25A21;SLC25A21	0.842105	0	0.807018	3.46999e-05	TRUE	FALSE	0
cg00816548	X	77154821	COX7B	0.87193	0	0.680702	0.00179245	FALSE	FALSE	0
cg00825309	19	58991885	ZNF446	0.889474	0	0.764912	0.000207123	FALSE	TRUE	0
cg00832270	X	77359535	PGK1	0.892982	0	0.768421	0.000184191	TRUE	FALSE	0
cg00837838	15	45003774	B2M	0.849123	0	0.721053	0.000718586	FALSE	FALSE	0
cg00838399	19	56154867	ZNF581	0.842105	0	0.703509	0.00109104	FALSE	FALSE	0
cg00839572	X	68047847	EFNB1	0.840351	0	0.794737	6.56523e-05	FALSE	FALSE	0
cg00845930	1	8021937	PARK7;PARK7	0.842105	0	0.747368	0.000355578	FALSE	FALSE	0
cg00865118	16	1011963	LMF1	0.889474	0	0.84386	0	FALSE	FALSE	0
cg00873186	2	96987921		0.894737	0	0.617544	0.00580234	FALSE	FALSE	0
cg00878023	X	21392544	CNKSR2;CNKSR2;CNKSR2;CNKSR2;CNKSR2;CNKSR2;CNKSR2;CNKSR2	0.863158	0	0.838596	0	TRUE	FALSE	0
cg00888402	17	33772796	SLFN13	0.859649	0	0.47193	0.0430195	TRUE	FALSE	0
cg00895705	X	54384537	WNK3;WNK3	0.903509	0	0.77193	0.000163189	FALSE	FALSE	0
cg00898157	9	115851944		0.892982	0	0.578947	0.0106827	FALSE	TRUE	0
cg00901687	17	48585270	MYCBPAP	0.847368	0	0.510526	0.0271916	FALSE	TRUE	0
cg00902147	17	76993394	CANT1;CANT1;CANT1	0.884211	0	0.777193	0.000135032	FALSE	FALSE	0
cg00902417	17	15492168	CDRT1	0.864912	0	0.766667	0.000195408	FALSE	TRUE	0
cg00904184	X	63425896	FAM123B	0.849123	0	0.901754	0	TRUE	FALSE	0
cg00906360	12	983561	WNK1;WNK1;WNK1;WNK1	0.864912	0	0.768421	0.000184191	FALSE	FALSE	0
cg00908189	16	619842	PIGQ;PIGQ	0.842105	0	0.715789	0.000817526	FALSE	TRUE	0
cg00910107	17	81032839		0.892982	0	0.598246	0.00794093	TRUE	FALSE	0
cg00911055	X	54069423	PHF8;PHF8;PHF8;PHF8	0.891228	0	0.84386	0	FALSE	FALSE	0
cg00912449	14	97431137		0.875439	0	0.663158	0.0025501	FALSE	TRUE	0
cg00914659	13	25671759	PABPC3	0.85614	0	0.687719	0.00154617	FALSE	FALSE	0
cg00918862	4	2936279	MFSD10;NOP14-AS1;MFSD10	0.847368	0	0.431579	0.0664706	FALSE	FALSE	0
cg00920231	8	59572007	NSMAF;NSMAF	0.877193	0	0.642105	0.00378473	FALSE	FALSE	0
cg00920960	X	122993419	XIAP	0.842105	0	0.785965	9.60713e-05	FALSE	FALSE	0
cg00935924	X	118708353	UBE2A;UBE2A	0.863158	0	0.801754	4.64892e-05	FALSE	FALSE	0
cg00936435	X	55187903	FAM104B;FAM104B;FAM104B;FAM104B;FAM104B;FAM104B;FAM104B;FAM104B	0.868421	0	0.763158	0.000219354	FALSE	FALSE	0
cg00938039	X	5808230	NLGN4X;NLGN4X	0.884211	0	0.670175	0.00222081	FALSE	FALSE	0
cg00940232	X	135962391	RBMX;RBMX;RBMX;RBMX;SNORD61	0.892982	0	0.821053	1.21192e-05	TRUE	FALSE	0
cg00941856	10	101674581	DNMBP	0.870175	0	0.724561	0.000658097	FALSE	FALSE	0
cg00956789	6	42952091	PPP2R5D;PPP2R5D;PPP2R5D;PPP2R5D	0.861404	0	0.859649	0	FALSE	FALSE	0
cg00968183	17	66137457		0.882456	0	0.807018	3.46999e-05	FALSE	FALSE	0
cg00969254	4	184404770		0.894737	0	0.735088	0.000500396	FALSE	FALSE	0
cg00973732	16	88803885	FAM38A	0.894737	0	0.592982	0.00862403	FALSE	TRUE	0
cg00975746	1	161409970		0.880702	0	0.791228	7.68918e-05	FALSE	FALSE	0
cg00981643	X	153363708	MECP2;MECP2	0.866667	0	0.564912	0.0131243	FALSE	FALSE	0
cg00997387	1	233363393	PCNXL2	0.836842	0	0.710526	0.000927047	TRUE	FALSE	0
cg00999638	12	66139263		0.9	0	0.85614	0	FALSE	TRUE	0
cg01001959	X	55935071		0.84386	0	0.815789	1.92403e-05	FALSE	FALSE	0
cg01002146	11	66360565	CCS;CCDC87	0.840351	0	0.67193	0.00214416	FALSE	FALSE	0
cg01002634	20	60697705	LSM14B;LSM14B	0.850877	0	0.503509	0.0296556	FALSE	FALSE	0
cg01008854	12	111126998	HVCN1;HVCN1	0.84386	0	0.775439	0.000143992	FALSE	FALSE	0
cg01009828	18	77170050	NFATC1;NFATC1;NFATC1;NFATC1;NFATC1;NFATC1;NFATC1;NFATC1;NFATC1;NFATC1	0.875439	0	0.554386	0.0152372	FALSE	FALSE	0
cg01018726	19	10602314	KEAP1;KEAP1	0.880702	0	0.807018	3.46999e-05	FALSE	FALSE	0
cg01031542	17	43404863		0.845614	0	0.668421	0.00229968	FALSE	FALSE	0
cg01035900	17	35767301	TADA2A;ACACA;TADA2A;ACACA;TADA2A	0.892982	0	0.819298	1.4331e-05	FALSE	FALSE	0
cg01041620	2	203499737	FAM117B	0.889474	0	0.564912	0.0131243	FALSE	FALSE	0
cg01044189	X	51137589		0.849123	0	0.640351	0.00390643	FALSE	FALSE	0
cg01045132	19	11649571	CNN1	0.840351	0	0.254386	0.291978	FALSE	TRUE	0
cg01049884	8	48418189	KIAA0146	0.898246	0	0.750877	0.000320886	FALSE	FALSE	0
cg01052065	X	110339654	PAK3;PAK3;PAK3	0.898246	0	0.782456	0.000110543	FALSE	FALSE	0
cg01052572	7	76719819		0.847368	0	0.826316	6.37252e-06	FALSE	FALSE	0
cg01054478	5	180100963		0.835088	0	0.659649	0.00272906	FALSE	FALSE	0
cg01058588	X	153775683	IKBKG;IKBKG;IKBKG;G6PD;IKBKG;IKBKG;IKBKG;G6PD;G6PD	0.859649	0	0.654386	0.00301662	TRUE	FALSE	0
cg01067224	X	41059148	USP9X;USP9X	0.849123	0	0.763158	0.000219354	FALSE	FALSE	0
cg01073976	X	73406663	FTX	0.905263	0	0.736842	0.000477298	FALSE	FALSE	0
cg01077566	2	198365596	HSPD1;HSPE1;HSPD1;HSPE1-MOB4	0.882456	0	0.77193	0.000163189	FALSE	FALSE	0
cg01078565	X	30233575	MAGEB2	0.866667	0	0.629825	0.00470573	FALSE	FALSE	0
cg01081438	1	92417998	BRDT;BRDT	0.9	0	0.675439	0.00199731	TRUE	FALSE	0
cg01084328	X	40064418		0.882456	0	0.785965	9.60713e-05	FALSE	FALSE	0
cg01087775	X	77042040	ATRX;ATRX	0.849123	0	0.757895	0.000259311	FALSE	FALSE	0
cg01097733	12	65930654	LOC100507065;LOC100507065;LOC100507065	0.84386	0	0.742105	0.000412963	FALSE	FALSE	0
cg01099541	X	134166046	FAM127A	0.835088	0	0.880702	0	FALSE	FALSE	0
cg01105557	1	15931098		0.87193	0	0.652632	0.0031178	FALSE	TRUE	0
cg01108554	X	129473637	SLC25A14;SLC25A14	0.835088	0	0.77193	0.000163189	TRUE	FALSE	0
cg01110103	11	121440223	SORL1	0.845614	0	0.598246	0.00794093	FALSE	FALSE	0
cg01114504	X	55115413	PAGE2	0.894737	0	0.752632	0.000304546	FALSE	FALSE	0
cg01115099	6	30525126	PRR3;GNL1;PRR3;GNL1	0.845614	0	0.819298	1.4331e-05	FALSE	FALSE	0
cg01118640	14	52816915		0.877193	0	0.72807	0.000601715	TRUE	FALSE	0
cg01122057	5	68811782	OCLN	0.863158	0	0.64386	0.00366614	FALSE	FALSE	0
cg01123250	2	210673545	UNC80;UNC80	0.875439	0	0.531579	0.0207625	FALSE	FALSE	0
cg01125381	X	49644706	LOC158572;USP27X;USP27X	0.840351	0	0.836842	0	FALSE	FALSE	0
cg01131985	22	45721650	FAM118A;FAM118A	0.849123	0	0.794737	6.56523e-05	FALSE	FALSE	0
cg01132052	3	52749334	NEK4;NEK4	0.894737	0	0.817544	1.67023e-05	TRUE	FALSE	0
cg01135477	2	54014017	ERLEC1;ERLEC1;ERLEC1;ASB3;ASB3;ASB3;GPR75-ASB3;ASB3;ASB3	0.873684	0	0.696491	0.0012776	FALSE	FALSE	0
cg01137782	3	114025429	TIGIT	0.866667	0	0.838596	0	FALSE	FALSE	0
cg01140782	X	152864413	FAM58A;FAM58A	0.857895	0	0.822807	1.006e-05	TRUE	FALSE	0
cg01143912	15	63762448		0.882456	0	0.580702	0.0104055	FALSE	FALSE	0
cg01145420	17	37356856	RPL19	0.882456	0	0.738596	0.000455042	FALSE	FALSE	0
cg01148193	2	135675773	CCNT2;CCNT2	0.892982	0	0.796491	6.04628e-05	FALSE	TRUE	0
cg01150083	X	48980043	GPKOW	0.857895	0	0.784211	0.00010313	TRUE	FALSE	0
cg01151686	17	33307622	LIG3;LIG3;LIG3;LIG3	0.861404	0	0.633333	0.0044257	FALSE	FALSE	0
cg01153376	16	818807	MSLN;MIR662;MSLN	0.891228	0	0.775439	0.000143992	FALSE	FALSE	0
cg01153660	12	54410487	HOXC4;HOXC6;HOXC5	0.850877	0	0.484211	0.0373544	FALSE	FALSE	0
cg01156747	7	120659		0.880702	0	0.715789	0.000817526	TRUE	FALSE	0
cg01157169	6	170190123	C6orf122;C6orf208	0.866667	0	0.824561	8.14662e-06	FALSE	FALSE	0
cg01162053	20	4991784	SLC23A2	0.898246	0	0.668421	0.00229968	FALSE	FALSE	0
cg01166930	X	46404528	ZNF674;LOC401588;ZNF674	0.838596	0	0.826316	6.37252e-06	FALSE	FALSE	0
cg01166932	15	57698073	CGNL1;CGNL1	0.850877	0	0.110526	0.651719	FALSE	FALSE	0
cg01167628	16	33956457		0.861404	0	0.692982	0.00138008	FALSE	FALSE	0
cg01169073	12	112280321	C12orf47;MAPKAPK5;MAPKAPK5;MAPKAPK5;MAPKAPK5	0.898246	0	0.570175	0.0121607	FALSE	FALSE	0
cg01171067	X	152077467		0.870175	0	0.698246	0.00122872	FALSE	FALSE	0
cg01171428	19	55248585	KIR2DL3	0.845614	0	0.501754	0.0302985	FALSE	FALSE	0
cg01176653	18	11761979	GNAL;GNAL;GNAL	0.887719	0	0.291228	0.225656	TRUE	FALSE	0
cg01177972	X	102022826		0.835088	0	0.807018	3.46999e-05	FALSE	FALSE	0
cg01191806	10	81680307	MBL1P	0.892982	0	0.691228	0.00143375	TRUE	FALSE	0
cg01197891	4	57843787	C4orf14;POLR2B;C4orf14	0.835088	0	0.712281	0.000889312	FALSE	FALSE	0
cg01201279	3	156543471	LEKR1	0.884211	0	0.535088	0.0198211	FALSE	FALSE	0
cg01201914	15	28644585		0.889474	0	0.705263	0.00104802	FALSE	FALSE	0
cg01204772	2	240738232		0.842105	0	0.649123	0.00332846	FALSE	FALSE	0
cg01213682	7	65591546	CRCP;CRCP;CRCP;CRCP;CRCP	0.849123	0	0.426316	0.0701356	FALSE	FALSE	0
cg01215118	X	152066708		0.85614	0	0.763158	0.000219354	TRUE	FALSE	0
cg01217475	4	65506367		0.842105	0	0.652632	0.0031178	FALSE	TRUE	0
cg01220720	6	32167020	NOTCH4	0.892982	0	0.754386	0.00028885	FALSE	FALSE	0
cg01221209	5	554886		0.842105	0	0.521053	0.023804	FALSE	TRUE	0
cg01223071	11	86472904		0.884211	0	0.661404	0.00263834	TRUE	FALSE	0
cg01225004	14	101922290		0.857895	0	0.587719	0.00935427	TRUE	FALSE	0
cg01229591	X	152759143	BGN;HAUS7	0.836842	0	0.766667	0.000195408	FALSE	FALSE	0
cg01230508	14	65569312	MAX;MAX;MAX;MAX;MAX;MAX	0.854386	0	0.817544	1.67023e-05	FALSE	FALSE	0
cg01230929	5	133706738	UBE2B	0.870175	0	0.580702	0.0104055	FALSE	FALSE	0
cg01235473	20	22549124	C20orf56	0.852632	0	0.631579	0.00456396	FALSE	FALSE	0
cg01241836	X	48901346	TFE3	0.9	0	0.780702	0.000118322	TRUE	FALSE	0
cg01248855	17	29234505	C17orf42	0.884211	0	0.707018	0.00100637	TRUE	FALSE	0
cg01254501	20	49175308	PTPN1;PTPN1	0.842105	0	0.792982	7.1125e-05	FALSE	FALSE	0
cg01265653	11	96190436		0.903509	0	0.901754	0	FALSE	FALSE	0
cg01269161	X	30688536	GK;GK;GK;GK	0.852632	0	0.724561	0.000658097	FALSE	FALSE	0
cg01286388	X	77151065	MAGT1	0.845614	0	0.819298	1.4331e-05	FALSE	FALSE	0
cg01288367	X	68384992	PJA1;PJA1;PJA1	0.912281	0	0.82807	4.73137e-06	TRUE	FALSE	0
cg01288748	22	22577105		0.875439	0	0.692982	0.00138008	FALSE	TRUE	0
cg01289081	X	69353644	IGBP1	0.870175	0	0.724561	0.000658097	FALSE	FALSE	0
cg01290348	X	102942188	MORF4L2;MORF4L2;MORF4L2;MORF4L2;MORF4L2;MORF4L2;MORF4L2;MORF4L2;MORF4L2-AS1;MORF4L2;MORF4L2;MORF4L2;MORF4L2;MORF4L2;MORF4L2;MORF4L2;MORF4L2	0.891228	0	0.908772	0	FALSE	FALSE	0
cg01303569	X	48755020	TIMM17B;PQBP1;PQBP1;PQBP1;PQBP1;PQBP1;PQBP1;TIMM17B;PQBP1;PQBP1;PQBP1	0.870175	0	0.780702	0.000118322	TRUE	FALSE	0
cg01309671	X	133941225	FAM122C;FAM122C;FAM122C;FAM122C;FAM122C;FAM122C;FAM122C;FAM122C;FAM122C;FAM122C;FAM122C;FAM122C;FAM122C	0.866667	0	0.726316	0.000629407	FALSE	FALSE	0
cg01311227	Y	2709627	RPS4Y1;RPS4Y1	0.884211	0	0.666667	0.00238082	FALSE	FALSE	0
cg01324507	7	1177794	C7orf50;C7orf50;C7orf50	0.891228	0	0.64386	0.00366614	FALSE	FALSE	0
cg01326018	6	57350270	PRIM2	0.861404	0	0.642105	0.00378473	FALSE	FALSE	0
cg01326421	20	4983091	SLC23A2;SLC23A2	0.85614	0	0.894737	0	FALSE	FALSE	0
cg01329836	X	66764464	AR;AR	0.870175	0	0.810526	2.79303e-05	TRUE	FALSE	0
cg01332212	X	130926596	FIRRE	0.891228	0	0.622807	0.00530932	TRUE	FALSE	0
cg01338139	15	38987640	C15orf53	0.847368	0	0.677193	0.00192701	FALSE	TRUE	0
cg01340089	12	22199200	CMAS;CMAS	0.835088	0	0.607018	0.00690084	FALSE	FALSE	0
cg01364799	7	75623366	TMEM120A	0.847368	0	0.389474	0.100248	FALSE	TRUE	0
cg01366378	X	100353183		0.861404	0	0.745614	0.000373971	TRUE	FALSE	0
cg01369511	2	70528091	FAM136A	0.877193	0	0.814035	2.19525e-05	FALSE	FALSE	0
cg01370063	17	41978024	MPP2	0.847368	0	0.468421	0.0447556	FALSE	FALSE	0
cg01370599	3	116745421		0.85614	0	0.724561	0.000658097	FALSE	TRUE	0
cg01373059	17	30893725	MYO1D	0.840351	0	0.387719	0.101889	FALSE	FALSE	0
cg01373262	20	44034880	DBNDD2;DBNDD2;DBNDD2;SYS1-DBNDD2;DBNDD2	0.870175	0	0.736842	0.000477298	FALSE	FALSE	0
cg01373721	10	51623735	TIMM23	0.85614	0	0.768421	0.000184191	FALSE	FALSE	0
cg01383228	X	124336658		0.863158	0	0.594737	0.00839121	FALSE	FALSE	0
cg01386236	X	101410618	BEX5;BEX5;BEX5	0.838596	0	0.740351	0.000433605	FALSE	FALSE	0
cg01388693	3	187664092		0.847368	0	0.580702	0.0104055	TRUE	FALSE	0
cg01394167	4	9479622		0.838596	0	0.682456	0.00172809	TRUE	TRUE	0
cg01397495	2	136496804		0.882456	0	0.563158	0.0134589	TRUE	FALSE	0
cg01399914	X	75464784		0.850877	0	0.694737	0.00132804	FALSE	FALSE	0
cg01400712	2	25352206	EFR3B	0.849123	0	0.54386	0.0176169	FALSE	FALSE	0
cg01404988	X	53449561	SMC1A;RIBC1;SMC1A;RIBC1	0.849123	0	0.852632	0	FALSE	FALSE	0
cg01406652	X	128870103		0.863158	0	0.738596	0.000455042	FALSE	FALSE	0
cg01410230	X	100645860	RPL36A	0.849123	0	0.773684	0.000153372	TRUE	FALSE	0
cg01415308	X	49689228	CLCN5;CLCN5;CLCN5	0.857895	0	0.773684	0.000153372	FALSE	FALSE	0
cg01419069	X	71092795		0.849123	0	0.598246	0.00794093	FALSE	FALSE	0
cg01424816	10	30654476	GOLGA2P6;GOLGA2P6	0.849123	0	0.750877	0.000320886	FALSE	FALSE	0
cg01425168	7	70153200	AUTS2;AUTS2	0.835088	0	0.663158	0.0025501	FALSE	FALSE	0
cg01427108	3	46484379	LTF;LTF	0.868421	0	0.747368	0.000355578	TRUE	FALSE	0
cg01430241	X	153665714	GDI1	0.84386	0	0.794737	6.56523e-05	TRUE	FALSE	0
cg01442889	1	2415453	PLCH2	0.842105	0	0.617544	0.00580234	FALSE	FALSE	0
cg01443141	X	20400501		0.859649	0	0.75614	0.000273778	FALSE	FALSE	0
cg01444712	7	150210785	GIMAP7	0.838596	0	0.785965	9.60713e-05	FALSE	FALSE	0
cg01452167	11	73881794	PPME1;PPME1;C2CD3;C2CD3	0.835088	0	0.678947	0.00185874	FALSE	FALSE	0
cg01453114	21	45279625		0.850877	0	0.791228	7.68918e-05	FALSE	FALSE	0
cg01461762	X	100663470	GLA;HNRNPH2;HNRNPH2	0.873684	0	0.77193	0.000163189	TRUE	FALSE	0
cg01474481	12	121838152	RNF34;RNF34	0.894737	0	0.696491	0.0012776	FALSE	FALSE	0
cg01477427	X	53461421	HSD17B10;HSD17B10	0.842105	0	0.847368	0	FALSE	FALSE	0
cg01483252	X	46433132	CHST7	0.863158	0	0.692982	0.00138008	FALSE	FALSE	0
cg01483505	11	975446	AP2A2	0.896491	0	0.673684	0.00206967	FALSE	FALSE	0
cg01485266	19	2476132	GADD45B	0.849123	0	0.801754	4.64892e-05	FALSE	FALSE	0
cg01491428	16	2334163	ABCA3	0.868421	0	0.766667	0.000195408	TRUE	FALSE	0
cg01491794	2	9771341	YWHAQ	0.838596	0	0.580702	0.0104055	FALSE	FALSE	0
cg01494994	2	1062590	SNTG2	0.898246	0	0.75614	0.000273778	FALSE	FALSE	0
cg01497365	X	30671488	GK;GK;GK;GK;GK;GK;GK;GK	0.896491	0	0.826316	6.37252e-06	FALSE	FALSE	0
cg01498641	16	85365443		0.87193	0	0.735088	0.000500396	FALSE	FALSE	0
cg01501311	X	153200487	NAA10;NAA10;NAA10;NAA10;NAA10;NAA10	0.891228	0	0.766667	0.000195408	FALSE	FALSE	0
cg01501915	1	249200357	PGBD2;PGBD2	0.849123	0	0.431579	0.0664706	FALSE	FALSE	0
cg01507128	19	49561220		0.898246	0	0.654386	0.00301662	FALSE	FALSE	0
cg01509715	16	31073567	ZNF668	0.868421	0	0.601754	0.00751056	FALSE	FALSE	0
cg01511465	16	89986185	MC1R	0.840351	0	0.689474	0.0014891	FALSE	FALSE	0
cg01519985	X	100644559	RPL36A;RPL36A-HNRNPH2;RPL36A-HNRNPH2;RPL36A;BTK	0.838596	0	0.682456	0.00172809	FALSE	FALSE	0
cg01521131	6	31237664	HLA-C	0.875439	0	0.54386	0.0176169	TRUE	FALSE	0
cg01522456	1	115632236	TSPAN2	0.847368	0	0.42807	0.0688972	FALSE	FALSE	0
cg01528762	19	8455291	RAB11B;RAB11B	0.84386	0	0.577193	0.010966	FALSE	FALSE	0
cg01534424	5	139175399	PSD2	0.836842	0	0.796491	6.04628e-05	FALSE	FALSE	0
cg01540386	X	39873535		0.898246	0	0.817544	1.67023e-05	FALSE	FALSE	0
cg01540869	13	25116150		0.910526	0	0.857895	0	FALSE	FALSE	0
cg01542035	X	31285501	DMD;DMD;DMD;DMD;DMD;DMD;DMD;DMD;DMD;DMD;DMD;DMD;DMD;DMD;DMD;DMD;DMD;DMD	0.836842	0	0.663158	0.0025501	FALSE	FALSE	0
cg01543116	X	100184268	XKRX	0.880702	0	0.826316	6.37252e-06	FALSE	FALSE	0
cg01545055	16	67285131	SLC9A5	0.878947	0	0.75614	0.000273778	FALSE	FALSE	0
cg01545076	6	36760497	CPNE5	0.870175	0	0.861404	0	FALSE	FALSE	0
cg01545419	X	30265447	MAGEB1;MAGEB1;MAGEB1	0.842105	0	0.722807	0.000687814	FALSE	FALSE	0
cg01556502	14	103655568		0.852632	0	0.503509	0.0296556	FALSE	FALSE	0
cg01557297	14	23822017	SLC22A17;SLC22A17;SLC22A17	0.880702	0	0.703509	0.00109104	FALSE	FALSE	0
cg01557749	13	60970566	TDRD3;TDRD3;TDRD3	0.838596	0	0.654386	0.00301662	FALSE	FALSE	0
cg01579322	X	54209148	FAM120C	0.842105	0	0.775439	0.000143992	TRUE	FALSE	0
cg01584086	11	10373718		0.885965	0	0.566667	0.0127964	TRUE	FALSE	0
cg01585723	16	33734837		0.850877	0	0.642105	0.00378473	FALSE	TRUE	0
cg01590416	17	16472754	ZNF287	0.903509	0	0.663158	0.0025501	FALSE	FALSE	0
cg01593269	X	152676703		0.857895	0	0.784211	0.00010313	TRUE	FALSE	0
cg01600123	X	69672435	DLG3;DLG3;DLG3	0.863158	0	0.752632	0.000304546	TRUE	FALSE	0
cg01600189	9	66553962		0.847368	0	0.701754	0.00113548	FALSE	FALSE	0
cg01600263	X	102840724	TCEAL4;TCEAL4;TCEAL4;TCEAL4	0.838596	0	0.819298	1.4331e-05	FALSE	FALSE	0
cg01601155	17	8029790		0.861404	0	0.612281	0.00633216	FALSE	FALSE	0
cg01607721	X	73162620		0.838596	0	0.712281	0.000889312	FALSE	FALSE	0
cg01612532	15	23312026	HERC2P2	0.864912	0	0.615789	0.00597476	FALSE	FALSE	0
cg01623806	7	150929509	CHPF2	0.849123	0	0.621053	0.0054697	FALSE	TRUE	0
cg01624173	14	75981868		0.838596	0	0.768421	0.000184191	FALSE	TRUE	0
cg01626065	X	48420881	TBC1D25	0.847368	0	0.654386	0.00301662	FALSE	FALSE	0
cg01629329	20	2633258	NOP56;MIR1292;NOP56;NOP56	0.892982	0	0.498246	0.0316174	FALSE	TRUE	0
cg01629740	X	151144208	GABRE	0.873684	0	0.724561	0.000658097	FALSE	FALSE	0
cg01633149	16	16208885	ABCC1;ABCC1;ABCC1;ABCC1;ABCC1	0.847368	0	0.807018	3.46999e-05	FALSE	FALSE	0
cg01640287	13	24418308	MIPEP	0.905263	0	0.663158	0.0025501	FALSE	FALSE	0
cg01642733	8	17780317	PCM1	0.9	0	0.814035	2.19525e-05	FALSE	FALSE	0
cg01643284	12	105629755	APPL2	0.877193	0	0.682456	0.00172809	FALSE	FALSE	0
cg01655658	6	30227583	HLA-L	0.885965	0	0.82807	4.73137e-06	FALSE	FALSE	0
cg01659494	X	30264711	MAGEB1;MAGEB1;MAGEB1	0.842105	0	0.801754	4.64892e-05	FALSE	FALSE	0
cg01665013	3	28944717		0.901754	0	0.459649	0.0493356	FALSE	TRUE	0
cg01670029	8	144336241	ZFP41	0.884211	0	0.740351	0.000433605	FALSE	TRUE	0
cg01682370	15	79218994	CTSH	0.905263	0	0.735088	0.000500396	TRUE	FALSE	0
cg01686044	19	45754802	MARK4	0.907018	0	0.598246	0.00794093	FALSE	FALSE	0
cg01686861	16	60748		0.840351	0	0.701754	0.00113548	FALSE	FALSE	0
cg01697159	15	74094663		0.850877	0	0.721053	0.000718586	FALSE	FALSE	0
cg01698579	13	112823520		0.845614	0	0.673684	0.00206967	FALSE	TRUE	0
cg01706684	X	152110184	ZNF185;ZNF185;ZNF185;ZNF185;ZNF185;ZNF185;ZNF185;ZNF185	0.835088	0	0.74386	0.000393093	FALSE	FALSE	0
cg01710449	X	34961658	FAM47B	0.875439	0	0.829825	3.21707e-06	FALSE	FALSE	0
cg01710791	19	19144494	SFRS14;SFRS14;ARMC6;ARMC6	0.842105	0	0.591228	0.00886209	FALSE	FALSE	0
cg01714668	X	41193796	DDX3X;DDX3X;DDX3X;DDX3X;DDX3X	0.898246	0	0.773684	0.000153372	FALSE	FALSE	0
cg01718602	X	85403899	DACH2;DACH2	0.835088	0	0.808772	3.12119e-05	TRUE	FALSE	0
cg01720947	14	106379924		0.850877	0	0.747368	0.000355578	FALSE	FALSE	0
cg01721300	6	148459307		0.847368	0	0.419298	0.0752592	TRUE	FALSE	0
cg01726949	19	3111455	GNA11	0.864912	0	0.673684	0.00206967	FALSE	FALSE	0
cg01736784	11	125774092	DDX25;PUS3	0.845614	0	0.289474	0.228565	FALSE	FALSE	0
cg01737010	X	101772014	TMSB15A	0.854386	0	0.631579	0.00456396	FALSE	FALSE	0
cg01737421	X	48367069	PORCN;PORCN;PORCN;PORCN;PORCN	0.878947	0	0.726316	0.000629407	FALSE	FALSE	0
cg01739381	6	74079669	OOEP	0.84386	0	0.582456	0.0101341	FALSE	FALSE	0
cg01752898	X	38186917	RPGR;RPGR	0.857895	0	0.705263	0.00104802	FALSE	FALSE	0
cg01756327	17	74350268	PRPSAP1	0.863158	0	0.763158	0.000219354	FALSE	FALSE	0
cg01757534	6	91006597	BACH2;BACH2;BACH2	0.842105	0	0.694737	0.00132804	FALSE	FALSE	0
cg01762011	X	139173393		0.842105	0	0.768421	0.000184191	FALSE	FALSE	0
cg01762070	14	21101007		0.863158	0	0.673684	0.00206967	FALSE	FALSE	0
cg01762091	17	7197775	YBX2	0.898246	0	0.866667	0	FALSE	FALSE	0
cg01763625	X	41526000	CASK;CASK;CASK	0.866667	0	0.675439	0.00199731	FALSE	FALSE	0
cg01763702	7	1199903	ZFAND2A	0.85614	0	0.645614	0.00355061	FALSE	TRUE	0
cg01763875	11	123386864		0.892982	0	0.749123	0.000337889	FALSE	FALSE	0
cg01776615	17	76160887	C17orf99	0.857895	0	0.777193	0.000135032	FALSE	FALSE	0
cg01777017	X	138287603	FGF13;FGF13;FGF13	0.896491	0	0.789474	8.29641e-05	TRUE	FALSE	0
cg01783736	2	95454741	ANKRD20B	0.864912	0	0.838596	0	TRUE	FALSE	0
cg01784265	4	25080650		0.864912	0	0.803509	4.23294e-05	FALSE	TRUE	0
cg01786075	1	165738056	TMCO1;TMCO1	0.847368	0	0.712281	0.000889312	FALSE	FALSE	0
cg01797652	16	21740820	OTOA;OTOA;OTOA	0.877193	0	0.750877	0.000320886	FALSE	FALSE	0
cg01799862	16	67143802	C16orf70	0.866667	0	0.826316	6.37252e-06	FALSE	FALSE	0
cg01800426	8	17659068	MTUS1;MTUS1	0.849123	0	0.715789	0.000817526	FALSE	TRUE	0
cg01804576	X	100023937		0.861404	0	0.684211	0.00166562	FALSE	FALSE	0
cg01807303	11	73495319		0.861404	0	0.789474	8.29641e-05	FALSE	FALSE	0
cg01813026	11	809279	RPLP2	0.87193	0	0.633333	0.0044257	FALSE	FALSE	0
cg01814731	19	45567904	SFRS16	0.842105	0	0.761404	0.000232117	FALSE	FALSE	0
cg01818076	16	86532758		0.854386	0	0.577193	0.010966	TRUE	FALSE	0
cg01819759	13	79234251	RNF219	0.885965	0	0.778947	0.000126481	FALSE	TRUE	0
cg01826367	1	224180288		0.842105	0	0.324561	0.175037	FALSE	TRUE	0
cg01828661	1	16971394	MST1P2	0.861404	0	0.410526	0.0820568	FALSE	FALSE	0
cg01832266	21	34144059	C21orf66;C21orf66;C21orf49;C21orf66;C21orf66;C21orf49;C21orf66	0.885965	0	0.375439	0.113935	FALSE	FALSE	0
cg01843978	X	49772184	CLCN5;MIR362;CLCN5;MIR500	0.880702	0	0.575439	0.0112553	FALSE	FALSE	0
cg01845244	6	7911240	TXNDC5;TXNDC5	0.836842	0	0.466667	0.0456439	FALSE	FALSE	0
cg01850464	12	32552279		0.84386	0	0.612281	0.00633216	FALSE	FALSE	0
cg01862523	6	71123290	FAM135A;FAM135A;FAM135A;FAM135A	0.866667	0	0.766667	0.000195408	FALSE	FALSE	0
cg01864468	6	28863428		0.835088	0	0.752632	0.000304546	FALSE	FALSE	0
cg01866190	18	12884315	PTPN2;PTPN2;PTPN2;PTPN2;PTPN2;PTPN2;PTPN2;PTPN2	0.85614	0	0.484211	0.0373544	FALSE	FALSE	0
cg01867111	2	153574167	ARL6IP6;PRPF40A;ARL6IP6	0.864912	0	0.72807	0.000601715	FALSE	FALSE	0
cg01868016	14	93799226	BTBD7;BTBD7;BTBD7;KIAA1409;BTBD7	0.852632	0	0.701754	0.00113548	FALSE	FALSE	0
cg01869765	X	47862977	ZNF182;ZNF182;SPACA5	0.912281	0	0.833333	5.45502e-07	TRUE	FALSE	0
cg01869826	16	22173765		0.863158	0	0.650877	0.00322172	FALSE	FALSE	0
cg01870084	19	8042314	ELAVL1	0.842105	0	0.64386	0.00366614	FALSE	FALSE	0
cg01871867	2	20838317	HS1BP3	0.85614	0	0.805263	3.84027e-05	TRUE	FALSE	0
cg01878430	X	103411021	FAM199X	0.835088	0	0.661404	0.00263834	TRUE	FALSE	0
cg01886237	4	122378794		0.863158	0	0.826316	6.37252e-06	FALSE	FALSE	0
cg01888129	15	64126210	HERC1	0.863158	0	0.5	0.0309524	FALSE	FALSE	0
cg01888389	X	44735560	KDM6A	0.908772	0	0.666667	0.00238082	FALSE	FALSE	0
cg01893439	7	148581376	EZH2;EZH2;EZH2;EZH2	0.850877	0	0.492982	0.0336806	FALSE	FALSE	0
cg01894644	1	94147101	BCAR3;BCAR3;BCAR3	0.891228	0	0.589474	0.00910547	FALSE	FALSE	0
cg01900066	Y	22754881	EIF1AY	0.850877	0	0.735088	0.000500396	TRUE	TRUE	0
cg01909103	12	129572610	TMEM132D	0.864912	0	0.742105	0.000412963	FALSE	FALSE	0
cg01910452	X	152989424	BCAP31;BCAP31;ABCD1;BCAP31;BCAP31;BCAP31	0.896491	0	0.866667	0	FALSE	FALSE	0
cg01911060	1	20126720	TMCO4	0.864912	0	0.685965	0.00160499	FALSE	FALSE	0
cg01912435	X	68359870		0.891228	0	0.566667	0.0127964	FALSE	FALSE	0
cg01920494	4	4543764	STX18;STX18	0.861404	0	0.580702	0.0104055	FALSE	FALSE	0
cg01921740	X	40708797		0.87193	0	0.742105	0.000412963	FALSE	FALSE	0
cg01924074	X	53711167	HUWE1	0.861404	0	0.868421	0	TRUE	FALSE	0
cg01930713	15	74228464	LOXL1	0.84386	0	0.666667	0.00238082	TRUE	FALSE	0
cg01939450	5	17032596		0.85614	0	0.659649	0.00272906	FALSE	FALSE	0
cg01943447	1	180901423	KIAA1614	0.838596	0	0.615789	0.00597476	FALSE	FALSE	0
cg01944000	13	100741078	PCCA;PCCA;PCCA	0.842105	0	0.605263	0.00709942	FALSE	FALSE	0
cg01944484	12	149764	FAM138D	0.898246	0	0.670175	0.00222081	FALSE	FALSE	0
cg01947226	X	16889247	RBBP7	0.847368	0	0.780702	0.000118322	TRUE	FALSE	0
cg01951307	X	133940723	FAM122C;FAM122C;FAM122C;FAM122C;FAM122C;FAM122C;FAM122C	0.896491	0	0.819298	1.4331e-05	FALSE	FALSE	0
cg01952234	11	32457130	WT1;WIT1;WT1;WT1;WT1	0.873684	0	0.812281	2.48466e-05	FALSE	FALSE	0
cg01961587	X	54069785	PHF8;PHF8;PHF8;PHF8	0.903509	0	0.773684	0.000153372	TRUE	FALSE	0
cg01961848	7	6290259	CYTH3	0.857895	0	0.703509	0.00109104	TRUE	FALSE	0
cg01977519	19	7504058	ARHGEF18;ARHGEF18	0.845614	0	0.870175	0	FALSE	TRUE	0
cg01984154	Y	2718782	RPS4Y1	0.857895	0	0.696491	0.0012776	FALSE	TRUE	0
cg01990433	X	36980325		0.838596	0	0.578947	0.0106827	FALSE	FALSE	0
cg01991743	6	33053608	HLA-DPB1	0.859649	0	0.794737	6.56523e-05	TRUE	FALSE	0
cg01992010	X	150124492		0.842105	0	0.617544	0.00580234	FALSE	FALSE	0
cg01994252	12	130670747		0.882456	0	0.505263	0.0290236	FALSE	FALSE	0
cg01999076	X	46696420	RP2;RP2	0.875439	0	0.82807	4.73137e-06	FALSE	FALSE	0
cg02000145	6	31509402	BAT1;SNORD84;BAT1	0.907018	0	0.736842	0.000477298	FALSE	FALSE	0
cg02001584	X	19758532	SH3KBP1;SH3KBP1	0.87193	0	0.770175	0.000173456	FALSE	FALSE	0
cg02002345	Y	6777855	TBL1Y;TBL1Y;TBL1Y	0.84386	0	0.689474	0.0014891	FALSE	FALSE	0
cg02004872	Y	15815552	TMSB4Y;TMSB4Y	0.887719	0	0.764912	0.000207123	FALSE	FALSE	0
cg02007493	14	105647510	NUDT14	0.864912	0	0.578947	0.0106827	FALSE	FALSE	0
cg02008936	14	105187362		0.866667	0	0.608772	0.00670683	FALSE	FALSE	0
cg02012821	X	95940519	DIAPH2;DIAPH2	0.857895	0	0.740351	0.000433605	FALSE	FALSE	0
cg02017348	8	141046852	TRAPPC9;TRAPPC9	0.898246	0	0.684211	0.00166562	FALSE	FALSE	0
cg02022572	15	75932759	IMP3	0.849123	0	0.584211	0.00986849	FALSE	FALSE	0
cg02027518	4	118754417		0.85614	0	0.768421	0.000184191	FALSE	FALSE	0
cg02035866	X	19002442	PHKA2;PHKA2	0.87193	0	0.819298	1.4331e-05	FALSE	FALSE	0
cg02037976	1	150693868	HORMAD1;HORMAD1	0.866667	0	0.654386	0.00301662	FALSE	FALSE	0
cg02045259	10	43572467	RET;RET	0.859649	0	0.596491	0.00816354	FALSE	FALSE	0
cg02053896	X	70151117	SLC7A3;SLC7A3	0.849123	0	0.812281	2.48466e-05	FALSE	FALSE	0
cg02060185	X	145074779	MIR892C	0.863158	0	0.701754	0.00113548	FALSE	FALSE	0
cg02064073	3	33155252	CRTAP	0.840351	0	0.684211	0.00166562	FALSE	FALSE	0
cg02067414	4	169489000	PALLD;PALLD	0.842105	0	0.705263	0.00104802	FALSE	FALSE	0
cg02069755	2	71902636	DYSF;DYSF;DYSF;DYSF;DYSF;DYSF;DYSF;DYSF;DYSF;DYSF;DYSF;DYSF;DYSF;DYSF	0.847368	0	0.657895	0.00282231	FALSE	FALSE	0
cg02091593	14	24740847	RABGGTA;RABGGTA	0.84386	0	0.580702	0.0104055	FALSE	FALSE	0
cg02095987	X	71435936	PIN4;ERCC6L	0.903509	0	0.777193	0.000135032	FALSE	FALSE	0
cg02113729	13	99852422	UBAC2;UBAC2;UBAC2	0.842105	0	0.598246	0.00794093	FALSE	FALSE	0
cg02116333	X	53461433	HSD17B10;HSD17B10	0.842105	0	0.812281	2.48466e-05	FALSE	FALSE	0
cg02118671	8	143660412		0.892982	0	0.747368	0.000355578	TRUE	FALSE	0
cg02120013	X	50214405	DGKK	0.849123	0	0.792982	7.1125e-05	FALSE	FALSE	0
cg02124059	X	47341898	ZNF41;ZNF41;ZNF41	0.849123	0	0.687719	0.00154617	FALSE	FALSE	0
cg02125727	4	47916636	NFXL1	0.835088	0	0.657895	0.00282231	FALSE	FALSE	0
cg02129146	Y	7138198		0.838596	0	0.659649	0.00272906	TRUE	TRUE	0
cg02146966	17	18967117		0.875439	0	0.684211	0.00166562	FALSE	FALSE	0
cg02149842	5	171602932	STK10	0.840351	0	0.812281	2.48466e-05	TRUE	FALSE	0
cg02157463	16	87648182	JPH3	0.884211	0	0.778947	0.000126481	FALSE	FALSE	0
cg02161919	X	19002980	PHKA2	0.892982	0	0.845614	0	FALSE	FALSE	0
cg02165158	X	132425751		0.873684	0	0.696491	0.0012776	FALSE	FALSE	0
cg02167895	X	130913282	FIRRE	0.847368	0	0.750877	0.000320886	TRUE	FALSE	0
cg02178630	2	218678534	TNS1	0.854386	0	0.526316	0.0222416	FALSE	FALSE	0
cg02179292	17	48227910	PPP1R9B	0.847368	0	0.768421	0.000184191	FALSE	FALSE	0
cg02181309	14	23299298	MRPL52;MRPL52;MRPL52;MRPL52;MRPL52;MRPL52;MRPL52;MRPL52	0.84386	0	0.717544	0.000783412	FALSE	FALSE	0
cg02190746	10	5708765	ASB13;ASB13	0.866667	0	0.629825	0.00470573	FALSE	FALSE	0
cg02196458	15	90809250	NGRN;NGRN	0.901754	0	0.9	0	FALSE	TRUE	0
cg02201453	10	43704667	RASGEF1A;RASGEF1A	0.880702	0	0.729825	0.000574995	FALSE	FALSE	0
cg02201836	X	129039832	UTP14A;UTP14A	0.864912	0	0.742105	0.000412963	FALSE	FALSE	0
cg02206823	13	111483028		0.864912	0	0.592982	0.00862403	FALSE	FALSE	0
cg02215080	1	245496589	KIF26B	0.864912	0	0.775439	0.000143992	TRUE	FALSE	0
cg02216498	1	93790293	LOC100131564;LOC100131564	0.845614	0	0.615789	0.00597476	FALSE	FALSE	0
cg02217425	17	42366503		0.863158	0	0.640351	0.00390643	TRUE	FALSE	0
cg02217565	9	137175868		0.85614	0	0.668421	0.00229968	FALSE	FALSE	0
cg02224535	16	10905940	TVP23A	0.842105	0	0.759649	0.00024543	FALSE	FALSE	0
cg02225046	1	17222345		0.880702	0	0.749123	0.000337889	FALSE	FALSE	0
cg02226953	7	150525449		0.850877	0	0.712281	0.000889312	FALSE	FALSE	0
cg02227600	X	101854095	ARMCX5;ARMCX5;ARMCX5;ARMCX5-GPRASP2;ARMCX5;ARMCX5;ARMCX5;ARMCX5;ARMCX5;ARMCX5	0.873684	0	0.842105	0	FALSE	FALSE	0
cg02229344	X	130216380	FLJ30058	0.863158	0	0.824561	8.14662e-06	FALSE	FALSE	0
cg02232531	16	699316	WDR90	0.864912	0	0.685965	0.00160499	FALSE	FALSE	0
cg02233190	Y	22737591	EIF1AY	0.859649	0	0.708772	0.000966054	FALSE	FALSE	0
cg02243092	8	11970655	ZNF705D	0.852632	0	0.408772	0.0834701	FALSE	FALSE	0
cg02246922	6	29342824	OR12D3	0.854386	0	0.789474	8.29641e-05	TRUE	FALSE	0
cg02248423	X	148621396	CXorf40A;CXorf40A;CXorf40A;LINC00893	0.863158	0	0.824561	8.14662e-06	FALSE	FALSE	0
cg02249577	10	52434778		0.907018	0	0.775439	0.000143992	FALSE	FALSE	0
cg02249911	4	185570676	CCDC111;CASP3;CASP3	0.863158	0	0.707018	0.00100637	FALSE	TRUE	0
cg02250646	15	45020024	LOC100419583	0.864912	0	0.322807	0.177485	FALSE	FALSE	0
cg02252484	X	44429947		0.873684	0	0.642105	0.00378473	FALSE	FALSE	0
cg02261899	X	125686940	DCAF12L1	0.854386	0	0.733333	0.000524361	FALSE	FALSE	0
cg02266928	X	6897013		0.842105	0	0.773684	0.000153372	FALSE	FALSE	0
cg02275930	1	2372054		0.896491	0	0.72807	0.000601715	FALSE	TRUE	0
cg02279537	10	131120828		0.852632	0	0.812281	2.48466e-05	FALSE	TRUE	0
cg02285254	X	135229382	FHL1;FHL1;FHL1;FHL1;FHL1	0.885965	0	0.792982	7.1125e-05	FALSE	FALSE	0
cg02287936	X	18443686	CDKL5	0.891228	0	0.835088	0	FALSE	FALSE	0
cg02288667	X	135991582		0.861404	0	0.726316	0.000629407	TRUE	FALSE	0
cg02290962	X	134477987	ZNF75D;ZNF449;ZNF75D;ZNF75D	0.854386	0	0.840351	0	TRUE	FALSE	0
cg02293258	X	57147872	SPIN2B;SPIN2B;SPIN2B;SPIN2B;SPIN2B;SPIN2B	0.861404	0	0.77193	0.000163189	FALSE	FALSE	0
cg02295504	X	100878362	ARMCX3;ARMCX3;ARMCX3;ARMCX3	0.861404	0	0.87193	0	TRUE	FALSE	0
cg02300694	9	66553935	LOC728673;LOC403323;LOC403323	0.880702	0	0.766667	0.000195408	FALSE	FALSE	0
cg02307130	19	40030840	EID2	0.847368	0	0.615789	0.00597476	FALSE	FALSE	0
cg02309026	10	855060		0.866667	0	0.668421	0.00229968	FALSE	FALSE	0
cg02309772	14	100073879		0.838596	0	0.75614	0.000273778	FALSE	FALSE	0
cg02320265	2	160894		0.84386	0	0.836842	0	TRUE	FALSE	0
cg02321845	22	47169320	TBC1D22A;TBC1D22A;TBC1D22A;TBC1D22A;TBC1D22A	0.873684	0	0.714035	0.000852816	FALSE	FALSE	0
cg02324338	3	53292300		0.87193	0	0.559649	0.0141488	FALSE	FALSE	0
cg02324737	2	172543905	DYNC1I2	0.873684	0	0.714035	0.000852816	FALSE	TRUE	0
cg02330362	X	70402012		0.849123	0	0.74386	0.000393093	FALSE	FALSE	0
cg02340092	Y	16945913	NLGN4Y;NLGN4Y;NLGN4Y	0.873684	0	0.712281	0.000889312	TRUE	TRUE	0
cg02351056	10	126480372	METTL10	0.85614	0	0.731579	0.000549219	FALSE	FALSE	0
cg02355809	7	150412715	GIMAP1	0.892982	0	0.731579	0.000549219	TRUE	FALSE	0
cg02361306	19	35940461	FFAR2	0.863158	0	0.535088	0.0198211	FALSE	FALSE	0
cg02370566	17	78716850	RPTOR;RPTOR	0.842105	0	0.898246	0	TRUE	FALSE	0
cg02373807	16	15119667	PDXDC1;PDXDC1;PDXDC1;PDXDC1;PDXDC1;PDXDC1;PDXDC1	0.840351	0	0.768421	0.000184191	FALSE	FALSE	0
cg02376610	17	77609624		0.857895	0	0.650877	0.00322172	FALSE	TRUE	0
cg02379549	6	36887307	C6orf89	0.84386	0	0.738596	0.000455042	FALSE	FALSE	0
cg02393535	19	11093459	SMARCA4;SMARCA4;SMARCA4;SMARCA4;SMARCA4;SMARCA4;SMARCA4	0.836842	0	0.808772	3.12119e-05	FALSE	FALSE	0
cg02396496	17	74534090	CYGB	0.880702	0	0.603509	0.00730263	FALSE	FALSE	0
cg02399030	7	48128821	UPP1;UPP1;UPP1	0.87193	0	0.617544	0.00580234	FALSE	FALSE	0
cg02401352	15	89354338	ACAN;ACAN	0.870175	0	0.850877	0	TRUE	FALSE	0
cg02402209	4	152249812		0.891228	0	0.845614	0	FALSE	FALSE	0
cg02406234	10	74385863	MICU1;MICU1;MICU1;MICU1	0.849123	0	0.615789	0.00597476	FALSE	FALSE	0
cg02412982	X	125687704	DCAF12L1	0.849123	0	0.608772	0.00670683	TRUE	FALSE	0
cg02432274	16	88378468		0.87193	0	0.661404	0.00263834	FALSE	FALSE	0
cg02433498	17	36904779	PCGF2	0.87193	0	0.708772	0.000966054	FALSE	FALSE	0
cg02433927	X	39969103	BCOR;BCOR	0.870175	0	0.789474	8.29641e-05	FALSE	FALSE	0
cg02455723	19	9731811	ZNF561	0.847368	0	0.236842	0.327451	FALSE	FALSE	0
cg02456976	7	107498218		0.854386	0	0.522807	0.0232737	TRUE	FALSE	0
cg02457312	17	60347626	TBC1D3P2	0.894737	0	0.840351	0	FALSE	TRUE	0
cg02463166	2	54856417	SPTBN1;SPTBN1	0.877193	0	0.594737	0.00839121	FALSE	FALSE	0
cg02468154	11	43755634	HSD17B12	0.884211	0	0.863158	0	FALSE	FALSE	0
cg02472090	X	44142852	EFHC2	0.910526	0	0.812281	2.48466e-05	FALSE	FALSE	0
cg02479782	2	71033156		0.870175	0	0.742105	0.000412963	TRUE	FALSE	0
cg02480385	X	10092350	WWC3	0.863158	0	0.678947	0.00185874	FALSE	FALSE	0
cg02486009	15	22428395		0.849123	0	0.849123	0	FALSE	FALSE	0
cg02488385	21	36042752	CLIC6	0.849123	0	0.529825	0.0212465	FALSE	FALSE	0
cg02489157	21	43529162	UMODL1;UMODL1;C21orf128	0.901754	0	0.792982	7.1125e-05	FALSE	FALSE	0
cg02489479	X	71536273		0.898246	0	0.712281	0.000889312	FALSE	FALSE	0
cg02492740	X	56590362	UBQLN2	0.838596	0	0.905263	0	FALSE	FALSE	0
cg02496423	X	21958619	SMS	0.863158	0	0.736842	0.000477298	TRUE	FALSE	0
cg02497062	X	69352975	IGBP1	0.836842	0	0.75614	0.000273778	FALSE	FALSE	0
cg02505036	X	133675433	MIR450A1;MIR450B;MIR542;MIR450A2	0.882456	0	0.677193	0.00192701	FALSE	FALSE	0
cg02506043	1	17765068	RCC2;RCC2	0.889474	0	0.650877	0.00322172	FALSE	FALSE	0
cg02510708	X	123095692	STAG2;STAG2;STAG2;STAG2;STAG2;STAG2;STAG2	0.864912	0	0.749123	0.000337889	TRUE	FALSE	0
cg02519625	13	114191747	TMCO3	0.850877	0	0.724561	0.000658097	FALSE	FALSE	0
cg02523105	X	134232832	NCRNA00087	0.854386	0	0.877193	0	TRUE	FALSE	0
cg02524277	10	15130899	ACBD7	0.861404	0	0.610526	0.00651729	FALSE	FALSE	0
cg02529390	X	118207540		0.845614	0	0.766667	0.000195408	FALSE	FALSE	0
cg02534753	19	45349311	PVRL2;PVRL2	0.864912	0	0.629825	0.00470573	FALSE	FALSE	0
cg02539591	X	24483092	PDK3;PDK3	0.857895	0	0.75614	0.000273778	FALSE	FALSE	0
cg02540297	X	49297285	GAGE12G;GAGE2A;GAGE8;GAGE12B;GAGE8;GAGE12H;GAGE12D;GAGE2E;GAGE12E;GAGE12C;GAGE2A	0.873684	0	0.668421	0.00229968	FALSE	TRUE	0
cg02554605	14	60715777	PPM1A;PPM1A;PPM1A	0.907018	0	0.735088	0.000500396	FALSE	FALSE	0
cg02562448	10	50616670		0.885965	0	0.805263	3.84027e-05	FALSE	FALSE	0
cg02562693	X	146271794	MIR513C	0.836842	0	0.703509	0.00109104	FALSE	FALSE	0
cg02567750	1	247569605		0.87193	0	0.615789	0.00597476	FALSE	TRUE	0
cg02577989	13	44716179		0.884211	0	0.847368	0	FALSE	FALSE	0
cg02583883	X	112083504	AMOT	0.845614	0	0.9	0	FALSE	FALSE	0
cg02586883	X	21393898	CNKSR2;CNKSR2;CNKSR2;CNKSR2	0.854386	0	0.8	5.08914e-05	FALSE	FALSE	0
cg02588183	1	230456559		0.845614	0	0.649123	0.00332846	FALSE	FALSE	0
cg02602925	6	171019460		0.863158	0	0.682456	0.00172809	FALSE	FALSE	0
cg02621658	X	67867676	STARD8;STARD8;STARD8;STARD8	0.880702	0	0.757895	0.000259311	TRUE	FALSE	0
cg02623256	X	24483231	PDK3;PDK3	0.9	0	0.838596	0	FALSE	FALSE	0
cg02623604	X	150067276	CD99L2;CD99L2;CD99L2	0.84386	0	0.773684	0.000153372	FALSE	FALSE	0
cg02625745	2	37458728	CEBPZ;C2orf56;C2orf56;CEBPZ	0.877193	0	0.789474	8.29641e-05	FALSE	FALSE	0
cg02627298	X	135055930	MMGT1;MMGT1	0.850877	0	0.807018	3.46999e-05	TRUE	FALSE	0
cg02627872	1	229260510		0.866667	0	0.838596	0	TRUE	FALSE	0
cg02634083	X	150153136	HMGB3	0.870175	0	0.698246	0.00122872	FALSE	FALSE	0
cg02637608	X	65859146	EDA2R;EDA2R	0.859649	0	0.85614	0	FALSE	FALSE	0
cg02637882	X	129338226	ZNF280C	0.850877	0	0.498246	0.0316174	FALSE	FALSE	0
cg02645343	X	134656105	DDX26B	0.877193	0	0.873684	0	FALSE	FALSE	0
cg02647401	X	11775785	MSL3;MSL3;MSL3	0.864912	0	0.794737	6.56523e-05	TRUE	FALSE	0
cg02656959	1	21786446	NBPF3	0.882456	0	0.724561	0.000658097	FALSE	FALSE	0
cg02659041	16	29171609		0.835088	0	0.75614	0.000273778	FALSE	FALSE	0
cg02664390	1	179911884		0.892982	0	0.764912	0.000207123	FALSE	FALSE	0
cg02667487	16	67920036	NRN1L	0.857895	0	0.538596	0.0189143	FALSE	FALSE	0
cg02675245	19	15090017		0.885965	0	0.805263	3.84027e-05	FALSE	FALSE	0
cg02675299	X	37853690		0.847368	0	0.663158	0.0025501	FALSE	FALSE	0
cg02686174	17	36653866	ARHGAP23	0.835088	0	0.691228	0.00143375	FALSE	FALSE	0
cg02688867	12	133019854		0.903509	0	0.796491	6.04628e-05	FALSE	FALSE	0
cg02693249	1	205600567	ELK4;ELK4	0.9	0	0.654386	0.00301662	FALSE	FALSE	0
cg02698615	X	135580098	HTATSF1;HTATSF1	0.838596	0	0.901754	0	TRUE	FALSE	0
cg02707552	19	49993758	RPL13AP5;SNORD35A;SNORD33;SNORD34;RPL13A	0.861404	0	0.587719	0.00935427	FALSE	FALSE	0
cg02709323	1	121450364		0.889474	0	0.775439	0.000143992	FALSE	TRUE	0
cg02714192	18	77201972	NFATC1;NFATC1;NFATC1;NFATC1;NFATC1	0.861404	0	0.677193	0.00192701	FALSE	FALSE	0
cg02715797	16	838696	RPUSD1;CHTF18	0.878947	0	0.666667	0.00238082	FALSE	FALSE	0
cg02716302	4	190960010		0.877193	0	0.759649	0.00024543	FALSE	FALSE	0
cg02716779	9	131016143	DNM1;DNM1;DNM1;DNM1;DNM1	0.85614	0	0.680702	0.00179245	FALSE	FALSE	0
cg02718056	X	9964031		0.891228	0	0.915789	4.40065e-07	FALSE	FALSE	0
cg02718464	13	41384019	SUGT1L1;SLC25A15;MIR621	0.863158	0	0.289474	0.228565	FALSE	FALSE	0
cg02719634	11	2924899	SLC22A18AS;SLC22A18;SLC22A18AS;SLC22A18	0.845614	0	0.587719	0.00935427	FALSE	TRUE	0
cg02723913	15	22992214	CYFIP1;CYFIP1	0.847368	0	0.605263	0.00709942	FALSE	TRUE	0
cg02727232	19	53840480	ZNF845	0.894737	0	0.798246	5.5546e-05	FALSE	FALSE	0
cg02742139	X	153776358	IKBKG;IKBKG;IKBKG;G6PD;G6PD;IKBKG	0.840351	0	0.850877	0	FALSE	FALSE	0
cg02742990	X	24665458	PCYT1B;PCYT1B;PCYT1B	0.896491	0	0.873684	0	FALSE	FALSE	0
cg02745784	2	178970574	PDE11A	0.9	0	0.67193	0.00214416	FALSE	FALSE	0
cg02747390	7	104939819	SRPK2	0.866667	0	0.629825	0.00470573	FALSE	FALSE	0
cg02755929	X	30990125		0.836842	0	0.764912	0.000207123	FALSE	FALSE	0
cg02756511	X	106693692		0.870175	0	0.810526	2.79303e-05	TRUE	FALSE	0
cg02758766	2	740531		0.864912	0	0.775439	0.000143992	FALSE	FALSE	0
cg02770249	X	119603233	LAMP2;LAMP2;LAMP2	0.9	0	0.750877	0.000320886	TRUE	FALSE	0
cg02772171	5	171054642		0.85614	0	0.705263	0.00104802	TRUE	FALSE	0
cg02773050	X	134654287	DDX26B	0.835088	0	0.815789	1.92403e-05	TRUE	FALSE	0
cg02773151	X	107069063	MID2;MID2	0.852632	0	0.803509	4.23294e-05	TRUE	FALSE	0
cg02775882	14	103210570		0.854386	0	0.824561	8.14662e-06	FALSE	FALSE	0
cg02794321	X	109561119	AMMECR1;AMMECR1;AMMECR1	0.838596	0	0.731579	0.000549219	TRUE	FALSE	0
cg02797796	11	96240024	JRKL-AS1	0.87193	0	0.589474	0.00910547	FALSE	FALSE	0
cg02803670	X	134478751	ZNF75D;ZNF449;ZNF449	0.873684	0	0.759649	0.00024543	FALSE	FALSE	0
cg02811702	13	24901961		0.859649	0	0.589474	0.00910547	FALSE	TRUE	0
cg02821443	9	26892894	CAAP1;CAAP1	0.84386	0	0.670175	0.00222081	FALSE	FALSE	0
cg02837111	19	7660657	KIAA1543;KIAA1543	0.866667	0	0.729825	0.000574995	FALSE	FALSE	0
cg02839557	Y	6778641	TBL1Y;TBL1Y;TBL1Y	0.859649	0	0.684211	0.00166562	FALSE	FALSE	0
cg02840367	8	11660030	FDFT1	0.836842	0	0.350877	0.141101	FALSE	TRUE	0
cg02847589	1	22778394	ZBTB40;ZBTB40;ZBTB40;ZBTB40	0.835088	0	0.387719	0.101889	FALSE	FALSE	0
cg02854954	3	101442743	CEP97;CEP97	0.840351	0	0.661404	0.00263834	FALSE	FALSE	0
cg02856792	X	48769319	SLC35A2;SLC35A2;SLC35A2	0.870175	0	0.794737	6.56523e-05	FALSE	FALSE	0
cg02858817	X	26155148	MAGEB18	0.836842	0	0.801754	4.64892e-05	FALSE	FALSE	0
cg02860336	X	117832928		-0.835088	0	-0.626316	0.00500009	FALSE	FALSE	0
cg02860696	12	132935480		0.908772	0	0.635088	0.00429089	FALSE	FALSE	0
cg02866897	20	37470452	PPP1R16B;PPP1R16B	0.892982	0	0.836842	0	TRUE	FALSE	0
cg02869547	11	14521079	COPB1;COPB1;COPB1	0.882456	0	0.659649	0.00272906	FALSE	TRUE	0
cg02869694	X	153775262	IKBKG;G6PD;G6PD;IKBKG;IKBKG;IKBKG	0.838596	0	0.838596	0	TRUE	FALSE	0
cg02879223	X	69672415	DLG3;DLG3;DLG3	0.884211	0	0.698246	0.00122872	FALSE	FALSE	0
cg02881082	14	101694374		0.850877	0	0.74386	0.000393093	FALSE	FALSE	0
cg02882301	X	49126157	PPP1R3F	0.863158	0	0.803509	4.23294e-05	TRUE	FALSE	0
cg02889828	16	76769105		0.849123	0	0.8	5.08914e-05	FALSE	FALSE	0
cg02890812	X	129114962		0.836842	0	0.826316	6.37252e-06	TRUE	FALSE	0
cg02891332	18	9334497	TWSG1	0.852632	0	0.675439	0.00199731	FALSE	FALSE	0
cg02896496	X	54385394	WNK3;WNK3	0.842105	0	0.821053	1.21192e-05	TRUE	FALSE	0
cg02900017	1	144340251	LOC728855;LOC728855;LOC728875	0.838596	0	0.612281	0.00633216	FALSE	FALSE	0
cg02901522	8	129082086	PVT1	0.861404	0	0.754386	0.00028885	TRUE	FALSE	0
cg02904184	X	40126247		0.838596	0	0.845614	0	FALSE	FALSE	0
cg02905065	1	120837955	FAM72B	0.838596	0	0.633333	0.0044257	FALSE	FALSE	0
cg02910887	X	56815498	LINC01420	0.850877	0	0.64386	0.00366614	FALSE	FALSE	0
cg02919901	X	149934876	CD99L2;CD99L2;CD99L2;CD99L2;CD99L2	0.861404	0	0.578947	0.0106827	FALSE	FALSE	0
cg02932958	10	128814334	DOCK1;DOCK1	0.852632	0	0.761404	0.000232117	TRUE	FALSE	0
cg02937293	X	49687792	CLCN5;CLCN5	0.861404	0	0.852632	0	TRUE	FALSE	0
cg02937331	X	63413189	AMER1	0.868421	0	0.754386	0.00028885	FALSE	FALSE	0
cg02938958	X	25022847	ARX	0.847368	0	0.782456	0.000110543	FALSE	FALSE	0
cg02939364	X	18443708	CDKL5	0.836842	0	0.805263	3.84027e-05	FALSE	FALSE	0
cg02940028	X	100306693	TRMT2B;TRMT2B;TRMT2B;TRMT2B	0.84386	0	0.822807	1.006e-05	FALSE	FALSE	0
cg02944422	X	47696228	ZNF81	0.864912	0	0.775439	0.000143992	FALSE	FALSE	0
cg02951714	8	63924723		0.852632	0	0.710526	0.000927047	FALSE	FALSE	0
cg02953125	2	1079100	SNTG2	0.908772	0	0.789474	8.29641e-05	FALSE	TRUE	0
cg02954704	1	161349006		0.857895	0	0.721053	0.000718586	FALSE	TRUE	0
cg02958551	6	32975700	HLA-DOA	0.864912	0	0.742105	0.000412963	FALSE	FALSE	0
cg02958670	4	57256689		0.864912	0	0.436842	0.0629538	TRUE	FALSE	0
cg02968327	15	81584389	IL16;IL16	0.9	0	0.636842	0.00415945	TRUE	FALSE	0
cg02972788	11	124713125		0.845614	0	0.621053	0.0054697	FALSE	FALSE	0
cg02973417	X	153220895	HCFC1	0.866667	0	0.814035	2.19525e-05	FALSE	FALSE	0
cg02973971	X	149106460	LOC100272228;CXorf40B;CXorf40B	0.854386	0	0.715789	0.000817526	TRUE	FALSE	0
cg02987814	20	55675459		0.877193	0	0.301754	0.208723	FALSE	FALSE	0
cg02990147	X	24329623	FAM48B2	0.903509	0	0.824561	8.14662e-06	FALSE	FALSE	0
cg02996355	14	81879375		0.901754	0	0.787719	8.93533e-05	FALSE	TRUE	0
cg02998591	4	187619937	FAT1	0.903509	0	0.77193	0.000163189	FALSE	FALSE	0
cg03003060	X	13956166	GPM6B	0.85614	0	0.812281	2.48466e-05	FALSE	FALSE	0
cg03006172	8	1463125	DLGAP2	0.836842	0	0.564912	0.0131243	FALSE	FALSE	0
cg03007404	7	5821099	RNF216;RNF216	0.847368	0	0.705263	0.00104802	FALSE	FALSE	0
cg03009080	13	28024744	MTIF3;MTIF3;MTIF3;MTIF3	0.864912	0	0.654386	0.00301662	FALSE	FALSE	0
cg03010429	2	134352494		0.84386	0	0.685965	0.00160499	FALSE	FALSE	0
cg03017863	2	62115939	CCT4	0.868421	0	0.719298	0.000750442	FALSE	FALSE	0
cg03019812	6	29944670	HCG9	0.84386	0	0.47193	0.0430195	FALSE	FALSE	0
cg03020684	15	71532066	THSD4	0.912281	0	0.692982	0.00138008	TRUE	FALSE	0
cg03024502	16	84262458	KCNG4	0.836842	0	0.666667	0.00238082	FALSE	FALSE	0
cg03024957	X	106693522		0.885965	0	0.819298	1.4331e-05	FALSE	FALSE	0
cg03025340	X	153716662	SLC10A3;SLC10A3;SLC10A3	0.835088	0	0.777193	0.000135032	FALSE	FALSE	0
cg03026311	X	100075083	CSTF2	0.875439	0	0.789474	8.29641e-05	FALSE	FALSE	0
cg03029267	7	33075876	NT5C3A;NT5C3A;NT5C3A;NT5C3A	0.84386	0	0.7	0.00118136	FALSE	FALSE	0
cg03031357	X	21959700	SMS	0.870175	0	0.85614	0	FALSE	FALSE	0
cg03034673	7	106670287		0.905263	0	0.680702	0.00179245	TRUE	FALSE	0
cg03035998	X	19694994	SH3KBP1;SH3KBP1	0.85614	0	0.803509	4.23294e-05	FALSE	FALSE	0
cg03037864	22	42916984	RRP7A	0.859649	0	0.747368	0.000355578	FALSE	FALSE	0
cg03038395	X	25031600	ARX	0.835088	0	0.742105	0.000412963	TRUE	FALSE	0
cg03038615	12	96011071		0.842105	0	0.691228	0.00143375	FALSE	FALSE	0
cg03040210	X	131624077	MBNL3	0.863158	0	0.787719	8.93533e-05	FALSE	FALSE	0
cg03041989	16	30022548	DOC2A	0.847368	0	0.789474	8.29641e-05	FALSE	FALSE	0
cg03043267	X	15809023	ZRSR2	0.85614	0	0.803509	4.23294e-05	FALSE	FALSE	0
cg03048083	17	43339497	LOC100133991;LOC100133991;C17orf46	0.845614	0	0.785965	9.60713e-05	FALSE	FALSE	0
cg03052080	2	121342766		0.840351	0	0.707018	0.00100637	FALSE	FALSE	0
cg03056849	X	149861683	MTMR1	0.840351	0	0.803509	4.23294e-05	TRUE	FALSE	0
cg03057303	17	74558057	SNHG16;SNHG16;SNHG16;SNHG16	0.861404	0	0.550877	0.0159996	TRUE	FALSE	0
cg03059667	X	144899578	SLITRK2;SLITRK2;SLITRK2;SLITRK2	0.873684	0	0.784211	0.00010313	FALSE	FALSE	0
cg03066485	17	7232787	NEURL4;NEURL4	0.857895	0	0.654386	0.00301662	FALSE	FALSE	0
cg03078816	8	143361320	TSNARE1	0.898246	0	0.619298	0.00563401	TRUE	FALSE	0
cg03081115	22	17161258		0.836842	0	0.452632	0.0532552	FALSE	FALSE	0
cg03084184	10	133981681	JAKMIP3	0.87193	0	0.333333	0.16315	FALSE	FALSE	0
cg03089945	18	12884062	PTPN2;PTPN2;PTPN2	0.861404	0	0.62807	0.00485109	FALSE	FALSE	0
cg03099683	4	132661931		0.870175	0	0.364912	0.125064	FALSE	TRUE	0
cg03102729	X	120181504	GLUD2;GLUD2	0.896491	0	0.870175	0	FALSE	FALSE	0
cg03119308	7	127950724	RBM28;RBM28	0.85614	0	0.710526	0.000927047	TRUE	FALSE	0
cg03120461	X	12993214	TMSB4X;TMSL3	0.866667	0	0.754386	0.00028885	TRUE	FALSE	0
cg03129541	5	180076675	FLT4;FLT4	0.849123	0	0.498246	0.0316174	FALSE	FALSE	0
cg03131155	12	9600453	DDX12	0.849123	0	0.710526	0.000927047	FALSE	FALSE	0
cg03132228	2	219157702	TMBIM1;PNKD	0.87193	0	0.770175	0.000173456	FALSE	TRUE	0
cg03144406	17	78022789	CCDC40;CCDC40	0.857895	0	0.615789	0.00597476	FALSE	FALSE	0
cg03144494	17	79319862		0.85614	0	0.598246	0.00794093	FALSE	FALSE	0
cg03157806	X	148713279	TMEM185A;TMEM185A	0.849123	0	0.75614	0.000273778	TRUE	TRUE	0
cg03164112	2	237174027	ASB18	0.885965	0	0.524561	0.022753	FALSE	FALSE	0
cg03164238	19	54494652	CACNG6;CACNG6;CACNG6	0.861404	0	0.585965	0.00960858	FALSE	TRUE	0
cg03179419	13	114773785	RASA3	0.859649	0	0.775439	0.000143992	FALSE	FALSE	0
cg03181899	4	186456837	PDLIM3;PDLIM3	0.9	0	0.550877	0.0159996	FALSE	FALSE	0
cg03182218	17	7100221	DLG4;DLG4	0.835088	0	0.519298	0.0243438	FALSE	FALSE	0
cg03185552	17	81060259		0.835088	0	0.619298	0.00563401	TRUE	FALSE	0
cg03188685	3	144341907		0.878947	0	0.561404	0.0138004	TRUE	FALSE	0
cg03189022	X	153237590	TMEM187;HCFC1	0.901754	0	0.815789	1.92403e-05	FALSE	FALSE	0
cg03191149	X	106161946	CLDN2;CLDN2	0.889474	0	0.714035	0.000852816	FALSE	FALSE	0
cg03191830	19	36134461	ETV2	0.842105	0	0.642105	0.00378473	FALSE	FALSE	0
cg03198009	6	29648604		0.850877	0	0.538596	0.0189143	TRUE	FALSE	0
cg03199955	X	30671630	GK;GK;GK;GK;GK;GK	0.84386	0	0.792982	7.1125e-05	FALSE	FALSE	0
cg03202526	X	139587311	SOX3	0.864912	0	0.868421	0	TRUE	FALSE	0
cg03202738	4	156129735	NPY2R	0.847368	0	0.710526	0.000927047	FALSE	FALSE	0
cg03206401	2	130956119	TUBA3E	0.836842	0	0.6	0.0077233	TRUE	TRUE	0
cg03211561	X	18893303		0.880702	0	0.759649	0.00024543	FALSE	FALSE	0
cg03215942	17	18585471	ZNF286B	0.84386	0	0.664912	0.00246427	FALSE	FALSE	0
cg03219705	X	38420578	TSPAN7	0.875439	0	0.836842	0	FALSE	FALSE	0
cg03219922	4	132655659		0.870175	0	0.715789	0.000817526	FALSE	TRUE	0
cg03221436	X	48916091	CCDC120;CCDC120;CCDC120;CCDC120	0.884211	0	0.621053	0.0054697	FALSE	FALSE	0
cg03226871	2	128128958		0.894737	0	0.673684	0.00206967	FALSE	FALSE	0
cg03235083	5	73980966	HEXB	0.861404	0	0.729825	0.000574995	FALSE	FALSE	0
cg03236118	19	42977034	LIPE-AS1;LIPE-AS1	0.859649	0	0.87193	0	FALSE	FALSE	0
cg03242511	14	92789512	SLC24A4;SLC24A4;SLC24A4	0.845614	0	0.473684	0.0421715	FALSE	FALSE	0
cg03242668	16	86556405		0.859649	0	0.615789	0.00597476	FALSE	FALSE	0
cg03244189	Y	21238472	TTTY14	0.896491	0	0.814035	2.19525e-05	FALSE	FALSE	0
cg03244432	X	48367513	PORCN;PORCN;PORCN;PORCN;PORCN	0.907018	0	0.780702	0.000118322	FALSE	FALSE	0
cg03262205	2	178417515	TTC30B;TTC30B	0.880702	0	0.691228	0.00143375	FALSE	FALSE	0
cg03266527	Y	15591101	UTY;UTY;UTY	0.907018	0	0.694737	0.00132804	FALSE	TRUE	0
cg03267557	2	120776703	EPB41L5;EPB41L5;EPB41L5;EPB41L5	0.847368	0	0.354386	0.13696	FALSE	FALSE	0
cg03269290	10	124133922	PLEKHA1	0.852632	0	0.722807	0.000687814	FALSE	FALSE	0
cg03270074	2	95870287		0.84386	0	0.538596	0.0189143	FALSE	FALSE	0
cg03272642	X	69509773	PDZD11;PDZD11;KIF4A	0.854386	0	0.759649	0.00024543	TRUE	FALSE	0
cg03273606	X	101854301	ARMCX5;ARMCX5;ARMCX5;ARMCX5;ARMCX5;ARMCX5	0.852632	0	0.831579	1.82368e-06	TRUE	FALSE	0
cg03278573	5	10741861	DAP;DAP	0.903509	0	0.480702	0.0389093	FALSE	FALSE	0
cg03278675	17	72199729	RPL38;RPL38	0.870175	0	0.414035	0.0792844	FALSE	FALSE	0
cg03280530	X	68499942		0.842105	0	0.708772	0.000966054	FALSE	FALSE	0
cg03283048	16	2933047	FLYWCH2;FLYWCH2;FLYWCH2	0.866667	0	0.245614	0.309401	FALSE	FALSE	0
cg03286899	6	36561965	SFRS3	0.847368	0	0.480702	0.0389093	FALSE	FALSE	0
cg03290752	3	176915082	TBL1XR1	0.852632	0	0.62807	0.00485109	FALSE	FALSE	0
cg03299479	16	4470005		0.908772	0	0.696491	0.0012776	FALSE	TRUE	0
cg03307092	8	146228110	ZNF252;C8orf77	0.880702	0	0.757895	0.000259311	FALSE	FALSE	0
cg03317455	X	43514740	MAOA	0.845614	0	0.754386	0.00028885	TRUE	FALSE	0
cg03320037	2	153032057	STAM2	0.836842	0	0.782456	0.000110543	FALSE	FALSE	0
cg03324099	2	52761238		0.891228	0	0.74386	0.000393093	TRUE	FALSE	0
cg03327327	1	214779620	CENPF	0.861404	0	0.752632	0.000304546	FALSE	TRUE	0
cg03333546	19	13263065	IER2	0.849123	0	0.582456	0.0101341	FALSE	FALSE	0
cg03335173	X	151806923	GABRQ	0.85614	0	0.810526	2.79303e-05	TRUE	FALSE	0
cg03335434	X	40974523	USP9X;USP9X	0.854386	0	0.661404	0.00263834	FALSE	FALSE	0
cg03340371	2	1514107	TPO;TPO;TPO;TPO;TPO;TPO	0.852632	0	0.507018	0.0284023	FALSE	FALSE	0
cg03341064	X	48828399	KCND1	0.884211	0	0.877193	0	FALSE	FALSE	0
cg03344283	15	20562413		0.877193	0	0.580702	0.0104055	FALSE	FALSE	0
cg03345567	19	50321589	MED25;MED25	0.852632	0	0.466667	0.0456439	FALSE	FALSE	0
cg03357655	X	47546888		0.884211	0	0.645614	0.00355061	FALSE	FALSE	0
cg03359043	22	39711469	SNORD83A;RPL3;RPL3	0.870175	0	0.652632	0.0031178	FALSE	TRUE	0
cg03360374	X	48980258	GPKOW	0.836842	0	0.814035	2.19525e-05	FALSE	FALSE	0
cg03364121	X	119379165	CXorf42	0.863158	0	0.810526	2.79303e-05	FALSE	FALSE	0
cg03364150	10	46947700		0.910526	0	0.550877	0.0159996	FALSE	FALSE	0
cg03364167	11	85565963	CCDC83	0.845614	0	0.601754	0.00751056	FALSE	FALSE	0
cg03373419	22	50919943	ADM2	0.887719	0	0.65614	0.00291815	FALSE	FALSE	0
cg03380860	20	13107266	SPTLC3	0.838596	0	0.519298	0.0243438	FALSE	FALSE	0
cg03384992	18	21852325	OSBPL1A;OSBPL1A	0.849123	0	0.605263	0.00709942	FALSE	FALSE	0
cg03387135	20	61809827	MIR124-3	0.85614	0	0.457895	0.0502938	FALSE	FALSE	0
cg03391801	X	153607825	EMD;EMD	0.891228	0	0.784211	0.00010313	TRUE	FALSE	0
cg03395088	2	239959377		0.866667	0	0.594737	0.00839121	FALSE	FALSE	0
cg03395495	15	84821396		0.859649	0	0.814035	2.19525e-05	FALSE	FALSE	0
cg03400107	12	6643557	GAPDH	0.845614	0	0.578947	0.0106827	FALSE	FALSE	0
cg03403966	4	85504051	CDS1	0.836842	0	0.55614	0.0148671	FALSE	FALSE	0
cg03429475	16	31085693	ZNF668;ZNF646	0.854386	0	0.636842	0.00415945	FALSE	FALSE	0
cg03433313	16	819064	MIR662	0.849123	0	0.885965	0	FALSE	TRUE	0
cg03443112	2	68251804		0.885965	0	0.847368	0	FALSE	TRUE	0
cg03443205	2	43454133	LOC100129726;ZFP36L2	0.864912	0	0.645614	0.00355061	FALSE	FALSE	0
cg03453513	12	10596277	KLRC1	0.849123	0	0.808772	3.12119e-05	FALSE	FALSE	0
cg03460558	X	128657473	SMARCA1;SMARCA1	0.901754	0	0.747368	0.000355578	TRUE	FALSE	0
cg03462171	16	1664488	CRAMP1L	0.894737	0	0.635088	0.00429089	FALSE	TRUE	0
cg03470088	1	24513939	IL28RA;IL28RA;IL28RA	0.864912	0	0.585965	0.00960858	FALSE	FALSE	0
cg03471711	X	54019233	PHF8;PHF8;PHF8;PHF8	0.873684	0	0.740351	0.000433605	TRUE	FALSE	0
cg03478247	X	16651642	CTPS2;CTPS2;CTPS2	0.905263	0	0.84386	0	FALSE	FALSE	0
cg03485803	4	100792483		0.887719	0	0.578947	0.0106827	TRUE	FALSE	0
cg03487706	X	54666256		0.875439	0	0.738596	0.000455042	TRUE	FALSE	0
cg03493520	11	82535460	PRCP;PRCP	0.891228	0	0.703509	0.00109104	FALSE	FALSE	0
cg03494612	3	54119792		0.901754	0	0.875439	0	TRUE	FALSE	0
cg03504002	X	23926135	APOO;APOO;CXorf58;CXorf58;CXorf58;CXorf58	0.866667	0	0.82807	4.73137e-06	FALSE	FALSE	0
cg03506193	8	104033864	ATP6V1C1	0.901754	0	0.642105	0.00378473	FALSE	TRUE	0
cg03509467	7	76094015	DTX2;DTX2;DTX2	0.838596	0	0.792982	7.1125e-05	TRUE	FALSE	0
cg03509813	4	17812473	NCAPG;DCAF16	0.854386	0	0.466667	0.0456439	FALSE	FALSE	0
cg03513645	17	34891278	MYO19;MYO19;PIGW;MYO19;MYO19;MYO19;MYO19	0.861404	0	0.664912	0.00246427	FALSE	FALSE	0
cg03514519	X	46405603	ZNF674-AS1;ZNF674;ZNF674;ZNF674	0.870175	0	0.657895	0.00282231	FALSE	FALSE	0
cg03519711	1	86046512	CYR61;CYR61	0.889474	0	0.747368	0.000355578	FALSE	FALSE	0
cg03523199	X	133593973	HPRT1	0.850877	0	0.817544	1.67023e-05	FALSE	FALSE	0
cg03523550	11	64001996	VEGFB	0.842105	0	0.594737	0.00839121	FALSE	FALSE	0
cg03525852	8	7055288		0.908772	0	0.822807	1.006e-05	TRUE	FALSE	0
cg03533500	Y	21668420		0.891228	0	0.664912	0.00246427	TRUE	TRUE	0
cg03534059	X	153665491	GDI1;GDI1	0.905263	0	0.808772	3.12119e-05	FALSE	FALSE	0
cg03545077	2	1498138	TPO;TPO;TPO;TPO	0.852632	0	0.677193	0.00192701	FALSE	FALSE	0
cg03549571	12	49488198	DHH	0.910526	0	0.673684	0.00206967	FALSE	FALSE	0
cg03549618	14	35838977		0.849123	0	0.826316	6.37252e-06	FALSE	TRUE	0
cg03549682	4	150999280	DCLK2;DCLK2;DCLK2	0.842105	0	0.468421	0.0447556	FALSE	FALSE	0
cg03553358	16	11350115	SOCS1	0.866667	0	0.810526	2.79303e-05	FALSE	TRUE	0
cg03563842	2	239030728	ESPNL	0.847368	0	0.578947	0.0106827	FALSE	TRUE	0
cg03564880	2	67624387	ETAA1	0.835088	0	0.485965	0.0365955	FALSE	FALSE	0
cg03574672	X	44401588	FUNDC1	0.868421	0	0.619298	0.00563401	FALSE	FALSE	0
cg03575468	X	19362613	PDHA1	0.842105	0	0.794737	6.56523e-05	FALSE	FALSE	0
cg03580328	X	73641615	SLC16A2	0.889474	0	0.754386	0.00028885	TRUE	FALSE	0
cg03590418	X	153570171		0.866667	0	0.664912	0.00246427	TRUE	FALSE	0
cg03595199	8	39869813	IDO2	0.847368	0	0.47193	0.0430195	FALSE	FALSE	0
cg03602823	11	67219295	GPR152	0.850877	0	0.654386	0.00301662	FALSE	FALSE	0
cg03605032	X	149533195		0.847368	0	0.836842	0	TRUE	FALSE	0
cg03608192	14	107091369	MIR7641-2	0.845614	0	0.522807	0.0232737	FALSE	FALSE	0
cg03617902	11	118868795	CCDC84	0.836842	0	0.445614	0.0574116	FALSE	FALSE	0
cg03619648	X	37765256		0.87193	0	0.773684	0.000153372	TRUE	FALSE	0
cg03621084	5	1227286	SLC6A18	0.868421	0	0.585965	0.00960858	FALSE	TRUE	0
cg03623097	10	124213466	ARMS2	0.850877	0	0.72807	0.000601715	FALSE	TRUE	0
cg03629458	3	47555362	C3orf75	0.877193	0	0.629825	0.00470573	FALSE	FALSE	0
cg03634822	6	169013150	SMOC2;SMOC2	0.849123	0	0.694737	0.00132804	FALSE	FALSE	0
cg03641858	19	12777774	MORG1;MORG1;MAN2B1;MORG1	0.849123	0	0.7	0.00118136	FALSE	FALSE	0
cg03650730	2	242254743	SEPT2;SEPT2;SEPT2;SEPT2;SEPT2;SEPT2;SEPT2;SEPT2;HDLBP	0.845614	0	0.773684	0.000153372	FALSE	FALSE	0
cg03660162	16	78913085	WWOX;WWOX	0.898246	0	0.75614	0.000273778	FALSE	FALSE	0
cg03661529	X	77041828	ATRX;ATRX	0.850877	0	0.810526	2.79303e-05	TRUE	FALSE	0
cg03664916	16	89674560		0.908772	0	0.605263	0.00709942	FALSE	TRUE	0
cg03665832	7	98923565	ARPC1A;ARPC1A	0.842105	0	0.564912	0.0131243	FALSE	FALSE	0
cg03671298	X	46990716		0.884211	0	0.708772	0.000966054	FALSE	FALSE	0
cg03683587	X	50557066	SHROOM4;SHROOM4	0.868421	0	0.85614	0	FALSE	FALSE	0
cg03686964	5	1868279		0.864912	0	0.515789	0.0254528	FALSE	FALSE	0
cg03689070	10	133466918		0.857895	0	0.642105	0.00378473	TRUE	FALSE	0
cg03692134	X	129116990	BCORL1	0.910526	0	0.852632	0	TRUE	FALSE	0
cg03694580	7	2271722	MAD1L1;MAD1L1;MAD1L1	0.85614	0	0.594737	0.00839121	FALSE	TRUE	0
cg03695145	Y	15455322	UTY;UTY;UTY;UTY;UTY;UTY;UTY;UTY;UTY;UTY;UTY;UTY;UTY;UTY;UTY;UTY;UTY;UTY;UTY;UTY;UTY;UTY;UTY;UTY;UTY;UTY;UTY;UTY;UTY;UTY;UTY;UTY;UTY;UTY;UTY;UTY;UTY;UTY;UTY;UTY;UTY;UTY;UTY;UTY;UTY;UTY;UTY;UTY;UTY;UTY;UTY;UTY;UTY;UTY;UTY;UTY;UTY;UTY;UTY;UTY;UTY;UTY;UTY;UTY;UTY;UTY;UTY;UTY;UTY;UTY;UTY;UTY;UTY;UTY;UTY;UTY;UTY	0.850877	0	0.635088	0.00429089	TRUE	FALSE	0
cg03695513	20	35518728	TLDC2;TLDC2	0.868421	0	0.582456	0.0101341	FALSE	FALSE	0
cg03697541	1	196113815		0.850877	0	0.698246	0.00122872	TRUE	FALSE	0
cg03699426	13	114001816	GRTP1	0.889474	0	0.645614	0.00355061	FALSE	FALSE	0
cg03703650	12	58213485		0.836842	0	0.821053	1.21192e-05	TRUE	FALSE	0
cg03704653	X	8769344	FAM9A;FAM9A;FAM9A	0.877193	0	0.552632	0.0156147	FALSE	FALSE	0
cg03708092	6	160886239		0.887719	0	0.5	0.0309524	FALSE	FALSE	0
cg03716233	17	43128931	DCAKD;DCAKD;DCAKD	0.863158	0	0.792982	7.1125e-05	FALSE	FALSE	0
cg03717424	X	67651132	OPHN1	0.84386	0	0.738596	0.000455042	FALSE	FALSE	0
cg03718079	X	149716257		0.840351	0	0.780702	0.000118322	FALSE	FALSE	0
cg03724407	14	50053250	RPS29;RPS29	0.884211	0	0.691228	0.00143375	FALSE	FALSE	0
cg03727359	7	5465619		0.873684	0	0.533333	0.0202874	FALSE	FALSE	0
cg03733900	5	162932490	MAT2B;MAT2B	0.838596	0	0.614035	0.00615134	FALSE	FALSE	0
cg03734380	X	11446028	ARHGAP6;ARHGAP6;ARHGAP6;ARHGAP6	0.863158	0	0.692982	0.00138008	FALSE	FALSE	0
cg03735049	X	54466618	TSR2	0.880702	0	0.882456	0	FALSE	FALSE	0
cg03735077	X	102192803	RAB40AL	0.870175	0	0.664912	0.00246427	FALSE	FALSE	0
cg03746126	17	15653548		0.903509	0	0.563158	0.0134589	FALSE	FALSE	0
cg03749159	8	133714769		0.85614	0	0.55614	0.0148671	TRUE	FALSE	0
cg03751324	16	4029315	ADCY9	0.854386	0	0.705263	0.00104802	FALSE	FALSE	0
cg03751585	16	11557732	LOC101927131	0.836842	0	0.738596	0.000455042	FALSE	FALSE	0
cg03752386	X	102752443		0.849123	0	0.719298	0.000750442	FALSE	FALSE	0
cg03762537	X	111069761	TRPC5	0.889474	0	0.831579	1.82368e-06	FALSE	FALSE	0
cg03764959	9	67926724	ANKRD20A1;ANKRD20A3	0.875439	0	0.749123	0.000337889	FALSE	FALSE	0
cg03768687	X	70288358	SNX12	0.835088	0	0.847368	0	FALSE	FALSE	0
cg03770889	5	2352730		0.868421	0	0.785965	9.60713e-05	TRUE	FALSE	0
cg03773183	17	79325994		0.910526	0	0.763158	0.000219354	FALSE	TRUE	0
cg03778788	7	123672190	TMEM229A	0.9	0	0.564912	0.0131243	FALSE	FALSE	0
cg03779543	X	154470539		0.849123	0	0.580702	0.0104055	FALSE	FALSE	0
cg03781170	22	49279093	LINC01310	0.877193	0	0.447368	0.0563498	TRUE	FALSE	0
cg03782130	12	132219020	SFRS8	0.838596	0	0.529825	0.0212465	FALSE	FALSE	0
cg03784614	12	32259462	BICD1;BICD1	0.877193	0	0.719298	0.000750442	FALSE	FALSE	0
cg03790146	X	69480001	P2RY4	0.842105	0	0.522807	0.0232737	FALSE	FALSE	0
cg03790378	11	47278831	NR1H3;NR1H3;NR1H3	0.840351	0	0.722807	0.000687814	FALSE	FALSE	0
cg03791192	8	122330635		0.887719	0	0.666667	0.00238082	TRUE	FALSE	0
cg03796003	16	2746544	KCTD5	0.892982	0	0.592982	0.00862403	TRUE	FALSE	0
cg03797305	16	30209202	SULT1A3;SULT1A4;SULT1A4;SULT1A3	0.861404	0	0.624561	0.00515281	FALSE	FALSE	0
cg03801613	1	110229806	GSTM1;GSTM1	0.889474	0	0.714035	0.000852816	FALSE	FALSE	0
cg03805048	X	75648083	MAGEE1	0.873684	0	0.805263	3.84027e-05	FALSE	FALSE	0
cg03805456	X	14028891	GEMIN8;GEMIN8;GEMIN8	0.875439	0	0.764912	0.000207123	FALSE	FALSE	0
cg03806646	11	76176384	C11orf30;C11orf30;C11orf30;C11orf30	0.87193	0	0.803509	4.23294e-05	FALSE	FALSE	0
cg03809622	14	104552016	ASPG	0.849123	0	0.303509	0.205987	FALSE	FALSE	0
cg03810198	17	74679597	MXRA7;MXRA7;MXRA7	0.885965	0	0.622807	0.00530932	TRUE	FALSE	0
cg03811055	X	16888211	RBBP7;RBBP7	0.850877	0	0.798246	5.5546e-05	FALSE	FALSE	0
cg03814733	X	149106755	CXorf40B;LOC100272228	0.873684	0	0.884211	0	FALSE	FALSE	0
cg03821116	5	1498985	LPCAT1	0.835088	0	0.729825	0.000574995	FALSE	FALSE	0
cg03825335	X	23971699		0.854386	0	0.763158	0.000219354	FALSE	FALSE	0
cg03827304	8	2195000		0.885965	0	0.8	5.08914e-05	TRUE	FALSE	0
cg03830082	20	2672100	EBF4	0.868421	0	0.82807	4.73137e-06	FALSE	FALSE	0
cg03831206	X	48814955	OTUD5;OTUD5;OTUD5;OTUD5	0.889474	0	0.819298	1.4331e-05	FALSE	FALSE	0
cg03831293	1	33337583	FNDC5;FNDC5;FNDC5	0.863158	0	0.649123	0.00332846	FALSE	FALSE	0
cg03836087	1	28046592		0.905263	0	0.62807	0.00485109	FALSE	FALSE	0
cg03837724	4	1322728	MAEA;MAEA;MAEA;MAEA;MAEA;MAEA;MAEA	0.863158	0	0.703509	0.00109104	FALSE	FALSE	0
cg03838823	6	127914766		0.857895	0	0.501754	0.0302985	FALSE	FALSE	0
cg03843721	18	8367991	LOC100192426;PTPRM;PTPRM	0.84386	0	0.707018	0.00100637	FALSE	FALSE	0
cg03846689	6	111135840	CDK19	0.907018	0	0.654386	0.00301662	FALSE	FALSE	0
cg03847932	3	73045556	PPP4R2	0.873684	0	0.631579	0.00456396	FALSE	TRUE	0
cg03849132	8	104137224		0.861404	0	0.808772	3.12119e-05	FALSE	FALSE	0
cg03856109	11	44087712	ACCS;ACCS	0.887719	0	0.598246	0.00794093	FALSE	TRUE	0
cg03858262	X	70473929	ZMYM3;ZMYM3;BCYRN1;ZMYM3;ZMYM3;ZMYM3	0.875439	0	0.850877	0	TRUE	FALSE	0
cg03863838	6	36562081	SFRS3	0.891228	0	0.845614	0	FALSE	FALSE	0
cg03866835	16	67562656	FAM65A	0.894737	0	0.591228	0.00886209	FALSE	FALSE	0
cg03868193	11	124958746	SLC37A2;SLC37A2	0.908772	0	0.747368	0.000355578	FALSE	TRUE	0
cg03869498	6	1609827	FOXC1	0.87193	0	0.577193	0.010966	FALSE	FALSE	0
cg03876548	6	29893605	HCG4P6	0.868421	0	0.519298	0.0243438	FALSE	FALSE	0
cg03881738	6	170547103		0.896491	0	0.703509	0.00109104	FALSE	FALSE	0
cg03884976	16	577621	SOLH;C16orf10	0.85614	0	0.557895	0.0145044	FALSE	FALSE	0
cg03889767	4	987672	IDUA;SLC26A1;SLC26A1;SLC26A1	0.877193	0	0.0280702	0.91105	FALSE	FALSE	0
cg03895690	16	84150676	MBTPS1	0.878947	0	0.591228	0.00886209	FALSE	FALSE	0
cg03900028	7	64451426	ZNF117	0.880702	0	0.729825	0.000574995	TRUE	FALSE	0
cg03900860	X	119737944	MCTS1;MCTS1;MCTS1	0.873684	0	0.749123	0.000337889	TRUE	FALSE	0
cg03905487	X	53123054		0.892982	0	0.745614	0.000373971	TRUE	FALSE	0
cg03906572	X	152676991		0.850877	0	0.817544	1.67023e-05	TRUE	FALSE	0
cg03910582	17	19030146	GRAPL	0.850877	0	0.815789	1.92403e-05	FALSE	FALSE	0
cg03913278	8	11995002	FAM66D;USP17L2	0.859649	0	0.712281	0.000889312	FALSE	FALSE	0
cg03916902	14	31495714	STRN3;STRN3;AP4S1;AP4S1;AP4S1;AP4S1;AP4S1;AP4S1	0.864912	0	0.75614	0.000273778	FALSE	FALSE	0
cg03920450	7	23454734	IGF2BP3	0.836842	0	0.750877	0.000320886	FALSE	FALSE	0
cg03921823	10	38740692	LINC00999	0.857895	0	0.635088	0.00429089	FALSE	FALSE	0
cg03921839	1	3047462	PRDM16;PRDM16	0.882456	0	0.791228	7.68918e-05	TRUE	FALSE	0
cg03929089	4	120376271		0.894737	0	0.601754	0.00751056	FALSE	TRUE	0
cg03931619	X	140991599	MAGEC1	0.878947	0	0.587719	0.00935427	FALSE	FALSE	0
cg03940643	16	11343701		0.842105	0	0.619298	0.00563401	FALSE	FALSE	0
cg03940883	16	14380714		0.885965	0	0.529825	0.0212465	TRUE	FALSE	0
cg03944143	17	2595123	KIAA0664	0.9	0	0.575439	0.0112553	FALSE	TRUE	0
cg03945322	15	72766609	ARIH1	0.838596	0	0.731579	0.000549219	FALSE	FALSE	0
cg03958208	11	236908	PSMD13;PSMD13;SIRT3;PSMD13;PSMD13;SIRT3	0.849123	0	0.766667	0.000195408	FALSE	FALSE	0
cg03958744	13	114795097	RASA3	0.889474	0	0.807018	3.46999e-05	FALSE	FALSE	0
cg03960747	X	134853700	CT45A1	0.896491	0	0.557895	0.0145044	FALSE	TRUE	0
cg03964091	22	49062324	FAM19A5;FAM19A5	0.884211	0	0.847368	0	TRUE	FALSE	0
cg03965172	4	3683268		0.842105	0	0.663158	0.0025501	TRUE	FALSE	0
cg03966760	X	122993583	XIAP;XIAP;XIAP	0.882456	0	0.712281	0.000889312	FALSE	FALSE	0
cg03968699	X	153236214	HCFC1	0.873684	0	0.750877	0.000320886	FALSE	FALSE	0
cg03969070	1	36851558	STK40	0.892982	0	0.738596	0.000455042	FALSE	TRUE	0
cg03971283	X	153141451	L1CAM;L1CAM;L1CAM	0.868421	0	0.815789	1.92403e-05	FALSE	FALSE	0
cg03971469	X	25031338	ARX	0.907018	0	0.715789	0.000817526	FALSE	FALSE	0
cg03974185	12	109535959	UNG;UNG;UNG	0.842105	0	0.759649	0.00024543	FALSE	FALSE	0
cg03978795	10	134707159	CFAP46	0.845614	0	0.580702	0.0104055	FALSE	FALSE	0
cg03979311	5	54319996	GZMK	0.877193	0	0.882456	0	FALSE	FALSE	0
cg03982462	6	159888248		0.875439	0	0.680702	0.00179245	TRUE	FALSE	0
cg03987818	2	186988953		0.849123	0	0.773684	0.000153372	TRUE	FALSE	0
cg03990195	X	113625050		0.838596	0	0.685965	0.00160499	FALSE	FALSE	0
cg03991766	X	9755100	SHROOM2	0.877193	0	0.803509	4.23294e-05	FALSE	FALSE	0
cg03993166	15	101817914	SELS;SELS	0.877193	0	0.829825	3.21707e-06	FALSE	TRUE	0
cg03993368	X	134479056	ZNF75D;ZNF449	0.87193	0	0.72807	0.000601715	TRUE	FALSE	0
cg03995238	X	47079305	CDK16;CDK16	0.873684	0	0.701754	0.00113548	FALSE	FALSE	0
cg03995745	X	140268124		0.835088	0	0.647368	0.00343807	FALSE	FALSE	0
cg03998476	20	56884536	RAB22A;PPP4R1L	0.866667	0	0.585965	0.00960858	FALSE	FALSE	0
cg04000140	20	43977046	SDC4;SDC4	0.850877	0	0.692982	0.00138008	FALSE	FALSE	0
cg04016992	4	69537806	UGT2B15	0.884211	0	0.654386	0.00301662	FALSE	FALSE	0
cg04023335	Y	14100573		0.892982	0	0.668421	0.00229968	FALSE	FALSE	0
cg04024675	X	152989895	BCAP31;ABCD1;BCAP31;BCAP31;BCAP31;BCAP31	0.885965	0	0.833333	5.45502e-07	TRUE	FALSE	0
cg04024692	11	16760046	C11orf58;C11orf58	0.864912	0	0.65614	0.00291815	FALSE	FALSE	0
cg04025728	1	6259688	RPL22	0.850877	0	0.666667	0.00238082	FALSE	FALSE	0
cg04026379	X	47483043		0.892982	0	0.822807	1.006e-05	TRUE	FALSE	0
cg04027004	X	107019426	TSC22D3	0.857895	0	0.708772	0.000966054	TRUE	FALSE	0
cg04027132	2	179265365	MIR548N	0.87193	0	0.633333	0.0044257	FALSE	FALSE	0
cg04029282	X	131624049	MBNL3	0.847368	0	0.801754	4.64892e-05	FALSE	FALSE	0
cg04031645	X	53713676	HUWE1	0.880702	0	0.814035	2.19525e-05	FALSE	FALSE	0
cg04036196	7	33054710	NT5C3A;NT5C3A;NT5C3A;NT5C3A	0.878947	0	0.773684	0.000153372	TRUE	FALSE	0
cg04037836	X	109417108	TMEM164;TMEM164	0.905263	0	0.687719	0.00154617	FALSE	FALSE	0
cg04042030	Y	6778623	TBL1Y;TBL1Y;TBL1Y	0.901754	0	0.622807	0.00530932	FALSE	TRUE	0
cg04049719	6	33039804	HLA-DPA1	0.875439	0	0.594737	0.00839121	FALSE	FALSE	0
cg04065558	X	3631575	PRKX;PRKX	0.850877	0	0.770175	0.000173456	FALSE	FALSE	0
cg04072009	X	71351668	NHSL2;RGAG4;RGAG4	0.864912	0	0.705263	0.00104802	TRUE	TRUE	0
cg04073914	4	84461507	AGPAT9	0.896491	0	0.815789	1.92403e-05	TRUE	FALSE	0
cg04075675	X	149861694	MTMR1	0.9	0	0.750877	0.000320886	FALSE	FALSE	0
cg04078634	12	92317757		0.854386	0	0.768421	0.000184191	FALSE	TRUE	0
cg04080353	10	126849780	CTBP2;CTBP2	0.880702	0	0.724561	0.000658097	FALSE	FALSE	0
cg04084364	2	39348200	SOS1	0.852632	0	0.698246	0.00122872	FALSE	FALSE	0
cg04084600	2	235016302		0.873684	0	0.612281	0.00633216	FALSE	FALSE	0
cg04085998	2	122647155		0.852632	0	0.766667	0.000195408	FALSE	FALSE	0
cg04092682	9	34628847	ARID3C	0.835088	0	0.714035	0.000852816	FALSE	FALSE	0
cg04097262	X	19090878	ADGRG2;ADGRG2;ADGRG2;ADGRG2;ADGRG2;ADGRG2;ADGRG2;ADGRG2;ADGRG2	0.868421	0	0.666667	0.00238082	FALSE	FALSE	0
cg04101969	13	20806477	GJB6;GJB6;GJB6;GJB6;GJB6;GJB6;GJB6	0.863158	0	0.573684	0.0115508	FALSE	FALSE	0
cg04105376	9	98358739		0.907018	0	0.773684	0.000153372	TRUE	FALSE	0
cg04105559	9	45726768		0.873684	0	0.670175	0.00222081	FALSE	FALSE	0
cg04112845	2	172379619	CYBRD1;CYBRD1	0.866667	0	0.715789	0.000817526	FALSE	FALSE	0
cg04114723	17	56219864		0.868421	0	0.621053	0.0054697	FALSE	FALSE	0
cg04115659	10	98480124	PIK3AP1	0.847368	0	0.514035	0.0260222	FALSE	FALSE	0
cg04118437	7	55931777	2022-09-14	0.857895	0	0.508772	0.0277917	FALSE	FALSE	0
cg04122461	1	44445537	B4GALT2;B4GALT2;B4GALT2	0.84386	0	0.622807	0.00530932	FALSE	FALSE	0
cg04123845	1	21044321	KIF17;KIF17	0.85614	0	0.738596	0.000455042	FALSE	FALSE	0
cg04128367	4	165952731	TRIM60	0.870175	0	0.7	0.00118136	FALSE	FALSE	0
cg04129556	7	176975		0.87193	0	0.698246	0.00122872	FALSE	FALSE	0
cg04131969	2	33951647	MYADML	0.880702	0	0.731579	0.000549219	TRUE	FALSE	0
cg04132418	6	131148736	LOC285733	0.864912	0	0.701754	0.00113548	TRUE	FALSE	0
cg04145681	6	30899162	SFTA2	0.847368	0	0.782456	0.000110543	TRUE	FALSE	0
cg04146011	8	145582151	FBXL6;GPR172A;FBXL6	0.885965	0	0.696491	0.0012776	FALSE	FALSE	0
cg04148753	6	4890597	CDYL;CDYL;CDYL;CDYL	0.882456	0	0.449123	0.0553032	FALSE	FALSE	0
cg04149335	14	24025152	THTPA;THTPA;THTPA	0.845614	0	0.6	0.0077233	FALSE	FALSE	0
cg04154653	1	1133248	TTLL10	0.901754	0	0.568421	0.0124753	TRUE	TRUE	0
cg04160515	2	239463147	LINC01107	0.845614	0	0.603509	0.00730263	FALSE	FALSE	0
cg04160749	8	58172571		0.868421	0	0.710526	0.000927047	FALSE	TRUE	0
cg04160876	16	15851757	MYH11;MYH11;MYH11;MYH11	0.850877	0	0.726316	0.000629407	FALSE	FALSE	0
cg04166638	17	79164389	AZI1;AZI1	0.9	0	0.661404	0.00263834	TRUE	FALSE	0
cg04177426	X	150863969		0.835088	0	0.747368	0.000355578	TRUE	FALSE	0
cg04178271	X	44318956		0.859649	0	0.808772	3.12119e-05	FALSE	FALSE	0
cg04180125	19	3557666	C19orf28;C19orf28;C19orf28	0.838596	0	0.6	0.0077233	FALSE	FALSE	0
cg04183498	X	20008522	LOC729609	0.84386	0	0.736842	0.000477298	TRUE	FALSE	0
cg04184316	X	118987146	UPF3B;UPF3B	0.882456	0	0.791228	7.68918e-05	FALSE	FALSE	0
cg04185893	1	97187305	PTBP2;PTBP2	0.884211	0	0.349123	0.143204	FALSE	FALSE	0
cg04189665	20	16555226	KIF16B	0.863158	0	0.873684	0	FALSE	FALSE	0
cg04193602	2	69035029	ARHGAP25;ARHGAP25;ARHGAP25;ARHGAP25	0.854386	0	0.578947	0.0106827	TRUE	FALSE	0
cg04197702	12	131310385	STX2;STX2	0.836842	0	0.401754	0.0893068	FALSE	FALSE	0
cg04202802	6	33396029	SYNGAP1	0.868421	0	0.745614	0.000373971	FALSE	FALSE	0
cg04210573	X	71351784	RGAG4;NHSL2	0.891228	0	0.824561	8.14662e-06	FALSE	FALSE	0
cg04222842	1	225965391	SRP9;SRP9	0.840351	0	0.887719	0	FALSE	TRUE	0
cg04234412	22	24373322	LOC391322	0.868421	0	0.624561	0.00515281	TRUE	TRUE	0
cg04238311	11	45945630	GYLTL1B;GYLTL1B;GYLTL1B	0.884211	0	0.682456	0.00172809	FALSE	FALSE	0
cg04241572	X	53461213	HSD17B10;HSD17B10	0.875439	0	0.742105	0.000412963	FALSE	FALSE	0
cg04244433	13	27999369	GTF3A	0.842105	0	0.575439	0.0112553	FALSE	FALSE	0
cg04244918	5	96421245		0.905263	0	0.55614	0.0148671	FALSE	FALSE	0
cg04245725	X	153141443	L1CAM;L1CAM;L1CAM;L1CAM;L1CAM	0.905263	0	0.777193	0.000135032	FALSE	FALSE	0
cg04255770	6	32804677	TAP2;TAP2	0.838596	0	0.692982	0.00138008	FALSE	FALSE	0
cg04255858	X	119764062	C1GALT1C1;C1GALT1C1	0.873684	0	0.870175	0	FALSE	FALSE	0
cg04270663	X	56590513	UBQLN2	0.840351	0	0.785965	9.60713e-05	FALSE	FALSE	0
cg04272560	4	925854	TMEM175;GAK	0.861404	0	0.629825	0.00470573	FALSE	FALSE	0
cg04277193	17	41438351		0.863158	0	0.178947	0.461923	FALSE	FALSE	0
cg04281359	X	39816075		0.85614	0	0.729825	0.000574995	FALSE	FALSE	0
cg04283377	X	47420348	ARAF	0.852632	0	0.808772	3.12119e-05	FALSE	FALSE	0
cg04285130	20	1206830	RAD21L1	0.84386	0	0.680702	0.00179245	FALSE	FALSE	0
cg04294190	X	129629140	FAM45B	0.873684	0	0.768421	0.000184191	FALSE	FALSE	0
cg04294971	17	80006775	RFNG	0.859649	0	0.691228	0.00143375	FALSE	FALSE	0
cg04300278	X	122318890	GRIA3;GRIA3	0.84386	0	0.770175	0.000173456	FALSE	FALSE	0
cg04301719	15	89164530	AEN;AEN	0.882456	0	0.545614	0.0172008	FALSE	FALSE	0
cg04302300	X	107179321		0.884211	0	0.773684	0.000153372	FALSE	FALSE	0
cg04324607	X	9960206		0.868421	0	0.735088	0.000500396	FALSE	FALSE	0
cg04324727	14	79745579	NRXN3;NRXN3;NRXN3	0.859649	0	0.701754	0.00113548	FALSE	FALSE	0
cg04326875	X	54209709	FAM120C;FAM120C;FAM120C;FAM120C;FAM120C	0.878947	0	0.845614	0	FALSE	FALSE	0
cg04331561	4	167021679	TLL1	0.896491	0	0.761404	0.000232117	TRUE	FALSE	0
cg04334385	X	119620153		0.870175	0	0.768421	0.000184191	FALSE	FALSE	0
cg04334499	4	107242537	AIMP1;AIMP1;AIMP1	0.868421	0	0.712281	0.000889312	FALSE	FALSE	0
cg04335734	X	117593618		0.857895	0	0.742105	0.000412963	FALSE	FALSE	0
cg04337034	X	152666402		0.864912	0	0.831579	1.82368e-06	FALSE	FALSE	0
cg04341767	X	49687028	CLCN5;CLCN5	0.873684	0	0.877193	0	TRUE	FALSE	0
cg04342223	10	97454528	TCTN3;TCTN3	0.850877	0	0.74386	0.000393093	FALSE	FALSE	0
cg04343775	X	48214112	SSX3;SSX3	0.836842	0	0.72807	0.000601715	FALSE	FALSE	0
cg04351049	1	165325673	LMX1A	0.891228	0	0.605263	0.00709942	FALSE	FALSE	0
cg04361279	1	3560965	WDR8	0.838596	0	0.584211	0.00986849	FALSE	TRUE	0
cg04367913	19	53325104	ZNF28	0.847368	0	0.626316	0.00500009	FALSE	FALSE	0
cg04369574	X	102192359	RAB40AL	0.859649	0	0.714035	0.000852816	FALSE	FALSE	0
cg04376185	X	17755081	SCML1;SCML1;SCML1;SCML1	0.840351	0	0.75614	0.000273778	TRUE	FALSE	0
cg04377145	6	73331191	KCNQ5;KCNQ5;KCNQ5;KCNQ5;KCNQ5	0.842105	0	0.685965	0.00160499	FALSE	FALSE	0
cg04386759	6	170554795		0.838596	0	0.564912	0.0131243	FALSE	FALSE	0
cg04388053	X	153170347	AVPR2;AVPR2;AVPR2	-0.852632	0	-0.196491	0.418429	FALSE	FALSE	0
cg04388383	X	64754908	LAS1L;LAS1L;LAS1L	0.836842	0	0.742105	0.000412963	FALSE	FALSE	0
cg04392293	11	28399977		0.864912	0	0.77193	0.000163189	FALSE	FALSE	0
cg04395369	19	19739209	LPAR2	0.910526	0	0.608772	0.00670683	FALSE	FALSE	0
cg04398861	4	670694	MYL5	0.847368	0	0.733333	0.000524361	FALSE	FALSE	0
cg04399443	9	99960676		0.9	0	0.763158	0.000219354	TRUE	FALSE	0
cg04402486	X	131352242	RAP2C	0.852632	0	0.75614	0.000273778	TRUE	FALSE	0
cg04402740	8	22856983	RHOBTB2;RHOBTB2;RHOBTB2	0.870175	0	0.707018	0.00100637	FALSE	FALSE	0
cg04410558	19	56152199	ZNF580;ZNF580;ZNF580	0.852632	0	0.692982	0.00138008	FALSE	FALSE	0
cg04413724	6	31789540		0.861404	0	0.708772	0.000966054	FALSE	FALSE	0
cg04413754	X	39956558	BCOR;BCOR;BCOR;BCOR;BCOR;BCOR	0.901754	0	0.719298	0.000750442	FALSE	FALSE	0
cg04414946	X	9435372	TBL1X;TBL1X;TBL1X;TBL1X	0.852632	0	0.638596	0.00403132	FALSE	FALSE	0
cg04418647	8	50653901		0.894737	0	0.784211	0.00010313	FALSE	FALSE	0
cg04424654	X	109561524	AMMECR1;AMMECR1;AMMECR1	0.842105	0	0.796491	6.04628e-05	FALSE	FALSE	0
cg04425458	8	133492868	KCNQ3;KCNQ3	0.84386	0	0.675439	0.00199731	FALSE	FALSE	0
cg04441645	4	190332642		0.896491	0	0.584211	0.00986849	TRUE	FALSE	0
cg04446303	16	4322834	TFAP4;TFAP4	0.842105	0	0.459649	0.0493356	FALSE	FALSE	0
cg04449785	2	23607951	KLHL29	0.836842	0	0.812281	2.48466e-05	FALSE	FALSE	0
cg04454073	16	22207163		0.84386	0	0.664912	0.00246427	FALSE	FALSE	0
cg04455759	11	111956131	TIMM8B;SDHD;TIMM8B	0.864912	0	0.721053	0.000718586	FALSE	FALSE	0
cg04455999	X	119444838	FAM70A;FAM70A;FAM70A	0.836842	0	0.794737	6.56523e-05	TRUE	FALSE	0
cg04456492	7	20010777		0.864912	0	0.645614	0.00355061	TRUE	FALSE	0
cg04458285	1	204595125	LRRN2;LRRN2	0.877193	0	0.778947	0.000126481	FALSE	FALSE	0
cg04459579	18	29516710	TRAPPC8	0.885965	0	0.62807	0.00485109	FALSE	FALSE	0
cg04462915	17	76396609	PGS1;PGS1;PGS1;PGS1	0.87193	0	0.82807	4.73137e-06	TRUE	FALSE	0
cg04468686	1	42228224	HIVEP3;HIVEP3	0.838596	0	0.808772	3.12119e-05	FALSE	FALSE	0
cg04473235	5	77080995		0.847368	0	0.4	0.0908126	FALSE	FALSE	0
cg04479860	4	190767364		0.9	0	0.798246	5.5546e-05	FALSE	FALSE	0
cg04491367	16	89314115		0.845614	0	0.661404	0.00263834	FALSE	FALSE	0
cg04493908	Y	7426653		0.857895	0	0.705263	0.00104802	FALSE	FALSE	0
cg04498082	11	356222		0.836842	0	0.724561	0.000658097	FALSE	TRUE	0
cg04499151	7	100231278	TFR2	0.854386	0	0.738596	0.000455042	FALSE	TRUE	0
cg04499455	6	31356802		0.850877	0	0.773684	0.000153372	FALSE	FALSE	0
cg04508810	X	154299651	BRCC3;BRCC3;BRCC3;CMC4;MTCP1	0.840351	0	0.668421	0.00229968	FALSE	FALSE	0
cg04512759	X	102631253	NGFRAP1;NGFRAP1;NGFRAP1;NGFRAP1;NGFRAP1;NGFRAP1;NGFRAP1	0.861404	0	0.794737	6.56523e-05	TRUE	FALSE	0
cg04516011	X	84189179	UBE2DNL	0.849123	0	0.710526	0.000927047	FALSE	FALSE	0
cg04527603	1	53192088	ZYG11B	0.875439	0	0.664912	0.00246427	FALSE	FALSE	0
cg04530127	3	12848516	CAND2;CAND2	0.84386	0	0.847368	0	FALSE	FALSE	0
cg04530981	16	1786516	MAPK8IP3;MAPK8IP3	0.861404	0	0.508772	0.0277917	FALSE	FALSE	0
cg04547588	6	11538767	TMEM170B	0.907018	0	0.678947	0.00185874	FALSE	FALSE	0
cg04554949	22	18537267		0.836842	0	0.617544	0.00580234	FALSE	FALSE	0
cg04558112	16	69788908	NOB1	0.901754	0	0.657895	0.00282231	FALSE	FALSE	0
cg04567952	2	200775554	C2orf69	0.905263	0	0.782456	0.000110543	FALSE	FALSE	0
cg04571196	19	4910051	UHRF1;UHRF1	0.887719	0	0.494737	0.0329814	FALSE	FALSE	0
cg04576196	X	11134334	HCCS;HCCS;HCCS	0.857895	0	0.610526	0.00651729	FALSE	FALSE	0
cg04577214	19	36422477		0.836842	0	0.57193	0.0118526	FALSE	FALSE	0
cg04578002	8	140753818	TRAPPC9;TRAPPC9	0.850877	0	0.685965	0.00160499	FALSE	FALSE	0
cg04593227	4	2420516	ZFYVE28;ZFYVE28;ZFYVE28;ZFYVE28;CFAP99	0.840351	0	0.477193	0.0405147	FALSE	FALSE	0
cg04594242	17	7737283		0.847368	0	0.582456	0.0101341	FALSE	FALSE	0
cg04598744	6	70506758	LMBRD1	0.864912	0	0.468421	0.0447556	FALSE	FALSE	0
cg04599817	X	101410443	BEX5;BEX5	0.849123	0	0.796491	6.04628e-05	FALSE	FALSE	0
cg04600411	17	40269556	KAT2A	0.836842	0	0.670175	0.00222081	FALSE	FALSE	0
cg04603290	19	6660652		0.882456	0	0.870175	0	FALSE	FALSE	0
cg04604638	3	44688991	ZNF197;ZNF35	0.854386	0	0.745614	0.000373971	FALSE	FALSE	0
cg04613165	16	33358227		0.870175	0	0.580702	0.0104055	FALSE	TRUE	0
cg04613634	2	89127929		0.877193	0	0.815789	1.92403e-05	FALSE	FALSE	0
cg04618532	8	8243841		0.857895	0	0.617544	0.00580234	FALSE	FALSE	0
cg04626105	X	13727132	RAB9A	0.870175	0	0.654386	0.00301662	FALSE	FALSE	0
cg04634182	3	42699215	ZBTB47	0.849123	0	0.724561	0.000658097	FALSE	FALSE	0
cg04646809	7	1609853	KIAA1908;KIAA1908;KIAA1908;PSMG3;PSMG3	0.836842	0	0.598246	0.00794093	FALSE	FALSE	0
cg04647094	X	21857776	MBTPS2;MBTPS2	0.861404	0	0.850877	0	FALSE	FALSE	0
cg04647948	2	206950423	INO80D	0.873684	0	0.601754	0.00751056	FALSE	FALSE	0
cg04657146	19	12876947	HOOK2;HOOK2	0.838596	0	0.773684	0.000153372	TRUE	TRUE	0
cg04657205	15	34807050		0.901754	0	0.268421	0.265409	FALSE	FALSE	0
cg04657467	16	30662270	PRR14;PRR14	0.889474	0	0.589474	0.00910547	FALSE	FALSE	0
cg04657470	2	198365150	HSPE1;HSPE1;HSPD1;HSPD1	0.861404	0	0.322807	0.177485	FALSE	TRUE	0
cg04662015	7	143318041	FAM115C;FAM115C;FAM115C	0.838596	0	0.736842	0.000477298	FALSE	FALSE	0
cg04665049	14	74019826	HEATR4;HEATR4	0.852632	0	0.522807	0.0232737	FALSE	FALSE	0
cg04665139	X	15353772	PIGA;PIGA	0.901754	0	0.752632	0.000304546	TRUE	FALSE	0
cg04671386	19	49663485	TRPM4	0.887719	0	0.35614	0.134923	FALSE	TRUE	0
cg04673579	X	8816207		0.870175	0	0.715789	0.000817526	FALSE	FALSE	0
cg04674736	X	8656963	ANOS1	0.854386	0	0.6	0.0077233	TRUE	FALSE	0
cg04675919	X	49042889	PRICKLE3	0.838596	0	0.870175	0	TRUE	FALSE	0
cg04680230	2	151776216		0.845614	0	0.624561	0.00515281	TRUE	FALSE	0
cg04685060	X	30265350	MAGEB1;MAGEB1;MAGEB1;MAGEB1	0.873684	0	0.591228	0.00886209	FALSE	FALSE	0
cg04699312	21	45161297	PDXK	0.84386	0	0.698246	0.00122872	FALSE	FALSE	0
cg04702045	X	67653598	OPHN1	0.849123	0	0.819298	1.4331e-05	FALSE	FALSE	0
cg04712670	X	70474487	ZMYM3;ZMYM3;ZMYM3;ZMYM3;ZMYM3;ZMYM3;ZMYM3;BCYRN1	0.850877	0	0.75614	0.000273778	TRUE	FALSE	0
cg04716051	X	18443256	CDKL5	0.884211	0	0.729825	0.000574995	FALSE	FALSE	0
cg04721775	4	132647861		0.887719	0	0.615789	0.00597476	FALSE	TRUE	0
cg04721883	X	103499577	ESX1;ESX1	0.857895	0	0.708772	0.000966054	FALSE	FALSE	0
cg04729578	21	37376732	LINC01436;LOC101928269	0.842105	0	0.801754	4.64892e-05	FALSE	FALSE	0
cg04734394	X	48911060		0.880702	0	0.791228	7.68918e-05	TRUE	FALSE	0
cg04734841	6	167813267		0.868421	0	0.654386	0.00301662	FALSE	FALSE	0
cg04736676	21	47648933	MCM3AP-AS1;MCM3AP-AS1;MCM3AP-AS1;MCM3AP-AS1;LSS;LSS;LSS;LSS	0.898246	0	0.780702	0.000118322	FALSE	FALSE	0
cg04739874	X	131157495	MST4;MST4;MST4	0.894737	0	0.801754	4.64892e-05	FALSE	FALSE	0
cg04740258	3	138553760		0.878947	0	0.698246	0.00122872	FALSE	FALSE	0
cg04742780	20	61051915	GATA5	0.852632	0	0.764912	0.000207123	FALSE	FALSE	0
cg04747957	16	89751896	CDK10;CDK10;CDK10;CDK10;CDK10;CDK10	0.880702	0	0.631579	0.00456396	FALSE	FALSE	0
cg04748497	X	101906989	GPRASP1;GPRASP1;GPRASP1	0.880702	0	0.82807	4.73137e-06	FALSE	FALSE	0
cg04751886	X	53220515	KDM5C;KDM5C	0.866667	0	0.787719	8.93533e-05	FALSE	FALSE	0
cg04771729	X	130929851	LOC286467	0.847368	0	0.750877	0.000320886	FALSE	FALSE	0
cg04777541	X	71263427	NHSL2;RPS26P11	0.838596	0	0.673684	0.00206967	FALSE	FALSE	0
cg04778793	17	79454924		0.847368	0	0.517544	0.0248934	FALSE	FALSE	0
cg04783646	2	136289016	R3HDM1;ZRANB3	0.840351	0	0.626316	0.00500009	FALSE	FALSE	0
cg04794832	17	30593000	RHBDL3	0.861404	0	0.692982	0.00138008	FALSE	FALSE	0
cg04795638	17	15468098	FAM18B2;FAM18B2	0.880702	0	0.559649	0.0141488	FALSE	TRUE	0
cg04796763	14	21769176	RPGRIP1	0.840351	0	0.729825	0.000574995	FALSE	FALSE	0
cg04810909	17	53739815		0.864912	0	0.596491	0.00816354	TRUE	FALSE	0
cg04811556	X	133683331		0.9	0	0.75614	0.000273778	TRUE	FALSE	0
cg04812249	X	106171680	CLDN2;CLDN2;CLDN2	0.864912	0	0.710526	0.000927047	FALSE	FALSE	0
cg04814784	3	10182561	VHL;VHL	0.847368	0	0.757895	0.000259311	TRUE	FALSE	0
cg04817724	X	103809991	IL1RAPL2	0.868421	0	0.794737	6.56523e-05	FALSE	FALSE	0
cg04820593	X	54383906	WNK3;WNK3	0.880702	0	0.8	5.08914e-05	FALSE	FALSE	0
cg04824771	22	24372921	LOC391322	0.85614	0	0.563158	0.0134589	FALSE	TRUE	0
cg04824913	4	887549	GAK	0.87193	0	0.584211	0.00986849	FALSE	TRUE	0
cg04826882	13	114838756	RASA3	0.85614	0	0.619298	0.00563401	FALSE	FALSE	0
cg04828704	X	107070200	MID2;MID2	0.877193	0	0.759649	0.00024543	TRUE	FALSE	0
cg04832268	17	18022959	MYO15A	0.84386	0	0.650877	0.00322172	FALSE	FALSE	0
cg04836792	2	204192791	ABI2	0.878947	0	0.65614	0.00291815	FALSE	FALSE	0
cg04841583	6	32620376		0.898246	0	0.794737	6.56523e-05	TRUE	FALSE	0
cg04858776	11	59318494		0.903509	0	0.715789	0.000817526	FALSE	FALSE	0
cg04861259	X	49774573	CLCN5;CLCN5	0.854386	0	0.691228	0.00143375	FALSE	FALSE	0
cg04861534	X	11776260	MSL3;MSL3;MSL3;MSL3;MSL3	0.854386	0	0.789474	8.29641e-05	TRUE	FALSE	0
cg04862929	11	65122214	TIGD3	0.859649	0	0.580702	0.0104055	FALSE	FALSE	0
cg04867253	X	70472827	ZMYM3;ZMYM3;BCYRN1;ZMYM3;ZMYM3	0.864912	0	0.536842	0.0193634	FALSE	FALSE	0
cg04877802	2	203130345	NOP58	0.850877	0	0.717544	0.000783412	FALSE	FALSE	0
cg04878842	19	45874111	ERCC2;ERCC2	0.84386	0	0.764912	0.000207123	FALSE	TRUE	0
cg04879348	2	109124576	GCC2;GCC2	0.905263	0	0.77193	0.000163189	FALSE	TRUE	0
cg04882894	X	130423289	IGSF1;IGSF1;IGSF1;IGSF1;IGSF1;IGSF1;IGSF1;IGSF1;IGSF1	0.847368	0	0.777193	0.000135032	FALSE	FALSE	0
cg04887076	19	55477653	NLRP2	0.880702	0	0.52807	0.0217395	FALSE	TRUE	0
cg04888234	1	161675579	FCRLA	0.908772	0	0.817544	1.67023e-05	TRUE	FALSE	0
cg04889366	X	150347422	GPR50	0.842105	0	0.777193	0.000135032	FALSE	FALSE	0
cg04896838	X	13077781		0.849123	0	0.698246	0.00122872	FALSE	FALSE	0
cg04904331	7	49813033	VWC2	0.847368	0	0.64386	0.00366614	FALSE	FALSE	0
cg04904945	X	106787406	FRMPD3-AS1;FRMPD3	0.887719	0	0.761404	0.000232117	FALSE	FALSE	0
cg04907505	12	69004265	RAP1B;RAP1B	0.835088	0	0.550877	0.0159996	FALSE	FALSE	0
cg04907523	1	213124896	VASH2;VASH2;VASH2	0.836842	0	0.72807	0.000601715	FALSE	FALSE	0
cg04908325	14	74353526	ZNF410	0.9	0	0.62807	0.00485109	FALSE	FALSE	0
cg04910403	20	24973309	C20orf3	0.838596	0	0.819298	1.4331e-05	FALSE	FALSE	0
cg04917148	2	219082031	ARPC2;ARPC2	0.835088	0	0.768421	0.000184191	FALSE	FALSE	0
cg04917177	16	8962650	CARHSP1;CARHSP1;CARHSP1;CARHSP1;CARHSP1;CARHSP1	0.835088	0	0.621053	0.0054697	FALSE	FALSE	0
cg04923484	13	21334612	N6AMT2	0.849123	0	0.72807	0.000601715	FALSE	FALSE	0
cg04926827	X	109246494	TMEM164;TMEM164	0.87193	0	0.838596	0	FALSE	FALSE	0
cg04931156	16	58163352	C16orf80	0.866667	0	0.559649	0.0141488	FALSE	FALSE	0
cg04932755	X	68047893	EFNB1	0.87193	0	0.812281	2.48466e-05	FALSE	FALSE	0
cg04932840	17	34077141	GAS2L2	0.845614	0	0.615789	0.00597476	FALSE	FALSE	0
cg04947065	2	3606037	RNASEH1	0.894737	0	0.433333	0.065282	FALSE	FALSE	0
cg04948911	10	70091867	HNRNPH3;PBLD;HNRNPH3;HNRNPH3;PBLD;HNRNPH3	0.887719	0	0.808772	3.12119e-05	FALSE	FALSE	0
cg04950762	2	242943287		0.903509	0	0.512281	0.0266018	FALSE	FALSE	0
cg04958124	7	148823862	ZNF398;ZNF425	0.861404	0	0.510526	0.0271916	FALSE	FALSE	0
cg04958252	8	87517638	FAM82B	0.857895	0	0.601754	0.00751056	FALSE	FALSE	0
cg04960964	X	152677383		0.912281	0	0.791228	7.68918e-05	TRUE	FALSE	0
cg04963553	16	78076246		0.836842	0	0.761404	0.000232117	FALSE	TRUE	0
cg04968233	X	153200789	NAA10;NAA10;NAA10;RENBP	0.845614	0	0.661404	0.00263834	FALSE	FALSE	0
cg04971183	19	16132558	LINC00661	0.84386	0	0.708772	0.000966054	FALSE	FALSE	0
cg04972766	5	25911207		0.847368	0	0.726316	0.000629407	FALSE	FALSE	0
cg04976759	13	112669393		0.861404	0	0.819298	1.4331e-05	FALSE	TRUE	0
cg04978360	15	32322522	CHRNA7;CHRNA7;CHRNA7	0.838596	0	0.608772	0.00670683	FALSE	FALSE	0
cg04989524	X	123094336	LOC101928402;STAG2;STAG2;STAG2;STAG2;STAG2	0.842105	0	0.742105	0.000412963	FALSE	FALSE	0
cg04993339	12	131553996	ADGRD1	0.838596	0	0.777193	0.000135032	FALSE	FALSE	0
cg04994084	20	44941360		0.854386	0	0.724561	0.000658097	FALSE	FALSE	0
cg04995154	X	149529976		0.84386	0	0.829825	3.21707e-06	FALSE	FALSE	0
cg04996158	19	55770062	SAPS1	0.870175	0	0.668421	0.00229968	FALSE	FALSE	0
cg05008355	X	153095404	PDZD4;PDZD4;PDZD4;PDZD4;PDZD4;PDZD4	0.892982	0	0.836842	0	FALSE	FALSE	0
cg05008653	17	18907974	FAM83G;SLC5A10;SLC5A10	0.842105	0	0.580702	0.0104055	FALSE	FALSE	0
cg05013483	15	72978625	HIGD2B;BBS4	0.898246	0	0.614035	0.00615134	FALSE	FALSE	0
cg05016940	14	53242413	GNPNAT1	0.891228	0	0.849123	0	FALSE	FALSE	0
cg05023132	X	95939482	DIAPH2;DIAPH2	0.85614	0	0.745614	0.000373971	FALSE	FALSE	0
cg05023192	2	240965916	NDUFA10	0.908772	0	0.784211	0.00010313	TRUE	FALSE	0
cg05032353	X	128674224	OCRL;OCRL	0.884211	0	0.768421	0.000184191	FALSE	FALSE	0
cg05032903	X	99665948	PCDH19;PCDH19	0.898246	0	0.766667	0.000195408	TRUE	FALSE	0
cg05033936	X	3550371	PRKX	0.868421	0	0.712281	0.000889312	FALSE	FALSE	0
cg05036715	10	58777720		0.835088	0	0.663158	0.0025501	FALSE	TRUE	0
cg05037630	15	68095017	MAP2K5;MAP2K5;MAP2K5	0.873684	0	0.801754	4.64892e-05	FALSE	FALSE	0
cg05037738	3	194220473		0.903509	0	0.747368	0.000355578	FALSE	FALSE	0
cg05045807	17	32907686	C17orf102;TMEM132E	0.852632	0	0.507018	0.0284023	FALSE	FALSE	0
cg05047811	X	152875939		0.887719	0	0.810526	2.79303e-05	TRUE	FALSE	0
cg05051331	1	219504448		0.849123	0	0.724561	0.000658097	FALSE	FALSE	0
cg05054683	16	1124349	LOC146336	0.912281	0	0.715789	0.000817526	FALSE	TRUE	0
cg05055073	1	17014081		0.884211	0	0.722807	0.000687814	FALSE	FALSE	0
cg05059663	17	13972631	COX10	0.847368	0	0.603509	0.00730263	FALSE	FALSE	0
cg05061813	7	26301575		0.896491	0	0.849123	0	FALSE	FALSE	0
cg05062446	1	219347252	LYPLAL1	0.880702	0	0.749123	0.000337889	FALSE	FALSE	0
cg05071623	10	116852865	ATRNL1	0.887719	0	0.747368	0.000355578	FALSE	FALSE	0
cg05075963	9	96530326		0.870175	0	0.847368	0	FALSE	FALSE	0
cg05083020	X	48694089	PCSK1N	0.868421	0	0.852632	0	FALSE	FALSE	0
cg05089589	4	7220478	SORCS2	0.857895	0	0.684211	0.00166562	TRUE	FALSE	0
cg05091491	X	114423926	RBMXL3;LRCH2	0.880702	0	0.810526	2.79303e-05	FALSE	FALSE	0
cg05092018	X	106787713	FRMPD3-AS1;FRMPD3	0.836842	0	0.680702	0.00179245	FALSE	FALSE	0
cg05100479	X	113819290	HTR2C	0.847368	0	0.873684	0	FALSE	FALSE	0
cg05106231	17	7338152	TMEM102	0.854386	0	0.822807	1.006e-05	FALSE	FALSE	0
cg05106824	X	120181294	GLUD2	0.864912	0	0.747368	0.000355578	FALSE	FALSE	0
cg05107246	7	31441		0.850877	0	0.459649	0.0493356	FALSE	FALSE	0
cg05109065	X	72783402	LOC139201;CHIC1	0.870175	0	0.810526	2.79303e-05	TRUE	FALSE	0
cg05110739	10	81586762	LOC642361;NUTM2B-AS1;NUTM2B-AS1;NUTM2B-AS1	0.896491	0	0.689474	0.0014891	FALSE	FALSE	0
cg05116536	21	31621345		0.854386	0	0.715789	0.000817526	FALSE	FALSE	0
cg05116966	X	105969622	RNF128;RNF128	0.875439	0	0.74386	0.000393093	TRUE	FALSE	0
cg05121790	1	12123554	TNFRSF8;TNFRSF8	0.866667	0	0.652632	0.0031178	FALSE	FALSE	0
cg05123933	6	139017779		0.912281	0	0.678947	0.00185874	TRUE	FALSE	0
cg05128824	Y	15015176	DDX3Y	0.894737	0	0.675439	0.00199731	FALSE	TRUE	0
cg05129588	X	69425049	DGAT2L6	0.850877	0	0.659649	0.00272906	FALSE	FALSE	0
cg05130312	X	130930098	LOC286467	0.838596	0	0.714035	0.000852816	TRUE	FALSE	0
cg05134775	10	98273510	TLL2;TLL2	0.847368	0	0.559649	0.0141488	FALSE	FALSE	0
cg05135828	X	142721385	SLITRK4	0.850877	0	0.805263	3.84027e-05	TRUE	FALSE	0
cg05147108	X	128674369	OCRL;OCRL;OCRL;OCRL	0.875439	0	0.808772	3.12119e-05	FALSE	FALSE	0
cg05150906	12	124056376		0.857895	0	0.65614	0.00291815	FALSE	FALSE	0
cg05156062	2	135676290	CCNT2-AS1;CCNT2;CCNT2;CCNT2	0.85614	0	0.680702	0.00179245	FALSE	FALSE	0
cg05161773	17	75378036	SEPT9;SEPT9;SEPT9;SEPT9;SEPT9	0.842105	0	0.692982	0.00138008	TRUE	FALSE	0
cg05164514	4	148605397	PRMT10	0.836842	0	0.622807	0.00530932	FALSE	FALSE	0
cg05167468	15	21905516		0.854386	0	0.461404	0.0483916	FALSE	FALSE	0
cg05168404	7	5321726	SLC29A4;SLC29A4	0.861404	0	0.47193	0.0430195	FALSE	FALSE	0
cg05168419	X	38114129		0.857895	0	0.633333	0.0044257	FALSE	FALSE	0
cg05172693	X	119379153	CXorf42	0.880702	0	0.880702	0	FALSE	FALSE	0
cg05176970	17	724273	NXN	0.882456	0	0.687719	0.00154617	TRUE	TRUE	0
cg05180335	X	102631298	NGFRAP1;NGFRAP1;NGFRAP1;NGFRAP1;NGFRAP1;NGFRAP1;NGFRAP1	0.878947	0	0.835088	0	TRUE	FALSE	0
cg05185776	X	55187570	FAM104B;FAM104B;FAM104B;FAM104B;FAM104B;FAM104B;FAM104B;FAM104B	0.910526	0	0.631579	0.00456396	FALSE	FALSE	0
cg05192017	12	115273077		0.868421	0	0.842105	0	TRUE	FALSE	0
cg05192472	X	106449657	NUP62CL;CXorf41;NUP62CL;CXorf41	0.840351	0	0.901754	0	FALSE	FALSE	0
cg05201317	10	10202925		0.884211	0	0.233333	0.334846	FALSE	FALSE	0
cg05203949	19	9849151		0.857895	0	0.810526	2.79303e-05	FALSE	FALSE	0
cg05207724	X	152907912	DUSP9;DUSP9	0.847368	0	0.796491	6.04628e-05	TRUE	FALSE	0
cg05212419	X	63425250	FAM123B	0.850877	0	0.742105	0.000412963	FALSE	FALSE	0
cg05221514	X	149098226		0.836842	0	0.524561	0.022753	FALSE	FALSE	0
cg05222959	X	153665103	GDI1	0.854386	0	0.817544	1.67023e-05	FALSE	FALSE	0
cg05223760	X	49126243	PPP1R3F	0.885965	0	0.821053	1.21192e-05	TRUE	FALSE	0
cg05224614	5	154396783	KIF4B	0.836842	0	0.785965	9.60713e-05	FALSE	FALSE	0
cg05226315	11	14536026	PSMA1;PSMA1;PSMA1;PSMA1;PSMA1	0.898246	0	0.478947	0.0397056	FALSE	FALSE	0
cg05226457	9	115095963	PTBP3;PTBP3;PTBP3;PTBP3;PTBP3;PTBP3;MIR3134	0.85614	0	0.791228	7.68918e-05	FALSE	FALSE	0
cg05230487	X	153553404	TKTL1;TKTL1;TKTL1	0.840351	0	0.661404	0.00263834	FALSE	FALSE	0
cg05234568	11	5960015		0.852632	0	0.652632	0.0031178	FALSE	TRUE	0
cg05237260	9	44401998		0.859649	0	0.526316	0.0222416	FALSE	FALSE	0
cg05250874	17	36861947	MLLT6	0.840351	0	0.485965	0.0365955	FALSE	FALSE	0
cg05254098	19	2051254	MKNK2;MKNK2	0.84386	0	0.819298	1.4331e-05	FALSE	FALSE	0
cg05256967	3	81816600		0.894737	0	0.731579	0.000549219	FALSE	FALSE	0
cg05257947	X	11776394	MSL3;MSL3;MSL3;MSL3;MSL3	0.880702	0	0.792982	7.1125e-05	TRUE	FALSE	0
cg05260852	X	54665817		0.857895	0	0.821053	1.21192e-05	TRUE	FALSE	0
cg05272837	X	54071268	PHF8	0.908772	0	0.764912	0.000207123	FALSE	FALSE	0
cg05275182	16	29179176		0.903509	0	0.778947	0.000126481	FALSE	FALSE	0
cg05276469	17	16570473		0.840351	0	0.7	0.00118136	TRUE	FALSE	0
cg05279330	13	26776254		0.905263	0	0.878947	0	TRUE	FALSE	0
cg05283871	X	7896360	PNPLA4;PNPLA4	0.840351	0	0.892982	0	FALSE	FALSE	0
cg05284480	16	2318642	RNPS1;RNPS1	0.835088	0	0.703509	0.00109104	FALSE	FALSE	0
cg05288569	17	40021733	KLHL11	0.880702	0	0.547368	0.0167926	FALSE	FALSE	0
cg05290899	X	48769310	SLC35A2;SLC35A2;SLC35A2	0.866667	0	0.87193	0	FALSE	FALSE	0
cg05298677	6	36355542	ETV7	0.854386	0	0.598246	0.00794093	FALSE	FALSE	0
cg05301945	8	23218703	LOXL2;LOC100507156	0.836842	0	0.373684	0.115738	FALSE	FALSE	0
cg05302386	14	52734525	PTGDR;PTGDR	0.845614	0	0.714035	0.000852816	FALSE	FALSE	0
cg05305413	1	22327119	CELA3A	0.845614	0	0.633333	0.0044257	FALSE	FALSE	0
cg05305760	X	70712563	INGX;BCYRN1	0.864912	0	0.740351	0.000433605	FALSE	FALSE	0
cg05306977	X	22079743	PHEX;PHEX	0.891228	0	0.710526	0.000927047	FALSE	FALSE	0
cg05313921	X	84189658	UBE2DNL	0.838596	0	0.682456	0.00172809	FALSE	FALSE	0
cg05322190	X	142719333	SLITRK4	0.854386	0	0.549123	0.0163922	FALSE	FALSE	0
cg05323565	17	26276605		0.887719	0	0.452632	0.0532552	FALSE	FALSE	0
cg05331162	4	186347403	UFSP2;UFSP2	0.85614	0	0.750877	0.000320886	FALSE	FALSE	0
cg05349513	X	72299318	PABPC1L2A;PABPC1L2B-AS1;PABPC1L2A	0.840351	0	0.749123	0.000337889	FALSE	FALSE	0
cg05351360	8	95176562	CDH17;CDH17	0.861404	0	0.864912	0	TRUE	FALSE	0
cg05353869	11	75139544	KLHL35	0.884211	0	0.742105	0.000412963	FALSE	FALSE	0
cg05354594	14	55923136		0.838596	0	0.810526	2.79303e-05	FALSE	FALSE	0
cg05355320	19	55571354	RDH13;RDH13;RDH13;RDH13	0.838596	0	0.766667	0.000195408	FALSE	FALSE	0
cg05364766	7	136832262		0.880702	0	0.661404	0.00263834	TRUE	FALSE	0
cg05370638	X	37706736	DYNLT3	0.857895	0	0.778947	0.000126481	TRUE	FALSE	0
cg05371395	X	12156894	FRMPD4;FRMPD4	0.838596	0	0.864912	0	FALSE	FALSE	0
cg05372585	13	113016983		0.891228	0	0.8	5.08914e-05	TRUE	FALSE	0
cg05373298	2	201186572	SPATS2L;SPATS2L;SPATS2L;SPATS2L;SPATS2L;SPATS2L;SPATS2L	0.85614	0	0.27193	0.259018	TRUE	FALSE	0
cg05374090	X	152864599	FAM58A;FAM58A;FAM58A;FAM58A	0.870175	0	0.710526	0.000927047	TRUE	FALSE	0
cg05379196	X	150151580	HMGB3	0.836842	0	0.875439	0	TRUE	FALSE	0
cg05385973	X	37430777	LANCL3;LANCL3	0.842105	0	0.812281	2.48466e-05	FALSE	FALSE	0
cg05386387	18	71815086	FBXO15;FBXO15;C18orf55;FBXO15	0.864912	0	0.568421	0.0124753	FALSE	FALSE	0
cg05397816	X	117957786	ZCCHC12;ZCCHC12	0.850877	0	0.74386	0.000393093	TRUE	FALSE	0
cg05397870	9	33523364	ANKRD18B	0.854386	0	0.649123	0.00332846	FALSE	FALSE	0
cg05407200	11	93586725		0.842105	0	0.736842	0.000477298	TRUE	FALSE	0
cg05407825	18	2571088	NDC80;METTL4	0.863158	0	0.714035	0.000852816	FALSE	FALSE	0
cg05414703	8	38244642	LETM2;LETM2;LETM2;LETM2;LETM2;LETM2	0.884211	0	0.547368	0.0167926	FALSE	FALSE	0
cg05416337	18	49865270	DCC	0.870175	0	0.726316	0.000629407	TRUE	FALSE	0
cg05417729	2	3307997	TSSC1	0.887719	0	0.736842	0.000477298	FALSE	FALSE	0
cg05419622	6	6001380	NRN1	0.840351	0	0.770175	0.000173456	TRUE	FALSE	0
cg05420450	2	381079		0.84386	0	0.636842	0.00415945	FALSE	FALSE	0
cg05425577	X	54522221	FGD1;FGD1	0.892982	0	0.789474	8.29641e-05	TRUE	FALSE	0
cg05430257	12	12218620		0.873684	0	0.67193	0.00214416	FALSE	FALSE	0
cg05432953	X	71536395		0.861404	0	0.668421	0.00229968	FALSE	FALSE	0
cg05436043	22	42950295	SERHL2	0.852632	0	0.619298	0.00563401	FALSE	TRUE	0
cg05442715	X	23926141	CXorf58;CXorf58;CXorf58;APOO;APOO;CXorf58	0.908772	0	0.770175	0.000173456	FALSE	FALSE	0
cg05442807	7	72742177	FKBP6;FKBP6;TRIM50;TRIM50;FKBP6;FKBP6	0.859649	0	0.536842	0.0193634	FALSE	FALSE	0
cg05445331	X	133119028	GPC3;GPC3;GPC3;GPC3	0.84386	0	0.696491	0.0012776	FALSE	FALSE	0
cg05448187	17	62502446	CEP95;DDX5;DDX5	0.884211	0	0.698246	0.00122872	FALSE	FALSE	0
cg05450979	16	10855738	NUBP1	0.908772	0	0.840351	0	TRUE	FALSE	0
cg05452887	X	119005413	NDUFA1;RNF113A	0.868421	0	0.778947	0.000126481	TRUE	FALSE	0
cg05453042	17	19588367	SLC47A2;SLC47A2	0.857895	0	0.736842	0.000477298	FALSE	FALSE	0
cg05453458	X	100878340	ARMCX3;ARMCX3;ARMCX3	0.864912	0	0.794737	6.56523e-05	FALSE	FALSE	0
cg05455372	7	64314295	LOC168474	0.852632	0	0.605263	0.00709942	TRUE	FALSE	0
cg05460181	17	38935754	KRT27;KRT27	0.842105	0	0.377193	0.112153	FALSE	FALSE	0
cg05462328	2	172963910		0.835088	0	0.649123	0.00332846	FALSE	FALSE	0
cg05470074	X	101411227	BEX5;BEX5	0.859649	0	0.74386	0.000393093	FALSE	FALSE	0
cg05471110	6	160683206		0.896491	0	0.473684	0.0421715	TRUE	FALSE	0
cg05472237	X	69287177		0.861404	0	0.766667	0.000195408	FALSE	FALSE	0
cg05474077	X	80457709	HMGN5;SH3BGRL	0.889474	0	0.824561	8.14662e-06	FALSE	FALSE	0
cg05477582	16	66600478	CMTM1;CMTM1;CMTM1;CMTM1;CMTM1;CMTM1;CMTM1;CMTM1	0.84386	0	0.824561	8.14662e-06	TRUE	FALSE	0
cg05483357	1	26758668	DHDDS;DHDDS;DHDDS;DHDDS	0.878947	0	0.531579	0.0207625	FALSE	FALSE	0
cg05487923	4	1723131	TACC3;TMEM129;TMEM129	0.85614	0	0.607018	0.00690084	FALSE	FALSE	0
cg05488778	8	1898438	ARHGEF10	0.864912	0	0.582456	0.0101341	FALSE	FALSE	0
cg05489989	6	29456162	MAS1L	0.852632	0	0.8	5.08914e-05	FALSE	FALSE	0
cg05494459	X	48334337	FTSJ1;FTSJ1	0.840351	0	0.794737	6.56523e-05	FALSE	FALSE	0
cg05504986	Y	2712124	RPS4Y1;RPS4Y1	0.870175	0	0.65614	0.00291815	FALSE	FALSE	0
cg05512684	17	37879858	ERBB2;ERBB2	0.840351	0	0.74386	0.000393093	FALSE	FALSE	0
cg05513983	3	181444512	SOX2OT	0.85614	0	0.417544	0.0765833	FALSE	FALSE	0
cg05522559	X	55115352	PAGE2	0.840351	0	0.621053	0.0054697	FALSE	FALSE	0
cg05523500	3	73046033	PPP4R2	0.878947	0	0.857895	0	FALSE	FALSE	0
cg05523653	17	900031	TIMM22	0.866667	0	0.642105	0.00378473	FALSE	FALSE	0
cg05525888	2	131451228		0.835088	0	0.649123	0.00332846	FALSE	FALSE	0
cg05526809	4	1309416	MAEA;MAEA	0.884211	0	0.777193	0.000135032	FALSE	FALSE	0
cg05527382	X	38741038		0.838596	0	0.677193	0.00192701	FALSE	FALSE	0
cg05530348	X	134558579	NCRNA00086	0.840351	0	0.638596	0.00403132	FALSE	FALSE	0
cg05534333	X	153707029	LAGE3	0.905263	0	0.8	5.08914e-05	TRUE	FALSE	0
cg05536014	8	145856332	ARHGAP39	0.849123	0	0.661404	0.00263834	FALSE	FALSE	0
cg05536840	X	24511755	PDK3;PDK3	0.857895	0	0.757895	0.000259311	FALSE	FALSE	0
cg05544622	Y	9303646	TSPY1;TSPY4	0.854386	0	0.724561	0.000658097	FALSE	FALSE	0
cg05550202	5	177481396		0.891228	0	0.722807	0.000687814	FALSE	FALSE	0
cg05551025	X	110924355	ALG13;ALG13;ALG13;ALG13;ALG13;ALG13;ALG13;ALG13;ALG13;ALG13;ALG13;ALG13;ALG13;ALG13;ALG13;ALG13	0.868421	0	0.826316	6.37252e-06	FALSE	FALSE	0
cg05553214	21	33866820	EVA1C;EVA1C;EVA1C	0.889474	0	0.766667	0.000195408	FALSE	FALSE	0
cg05553756	X	23018130	DDX53;DDX53	0.908772	0	0.768421	0.000184191	FALSE	FALSE	0
cg05570109	2	39812572		0.852632	0	0.826316	6.37252e-06	TRUE	FALSE	0
cg05572020	16	3989254		0.849123	0	0.675439	0.00199731	FALSE	FALSE	0
cg05572207	X	152905493		0.850877	0	0.75614	0.000273778	FALSE	FALSE	0
cg05577902	7	6576152	GRID2IP	0.868421	0	0.724561	0.000658097	FALSE	FALSE	0
cg05588508	3	120007636		0.884211	0	0.305263	0.203275	FALSE	FALSE	0
cg05592527	X	100872988	ARMCX6;ARMCX6;ARMCX6;ARMCX6	0.891228	0	0.761404	0.000232117	FALSE	FALSE	0
cg05594230	X	70712403	INGX;BCYRN1	0.907018	0	0.833333	5.45502e-07	TRUE	FALSE	0
cg05599151	X	53111398	TSPYL2	0.85614	0	0.850877	0	FALSE	FALSE	0
cg05599348	X	103174718	MIR1256	0.863158	0	0.584211	0.00986849	FALSE	TRUE	0
cg05603630	10	52751341	PRKG1	0.838596	0	0.645614	0.00355061	FALSE	FALSE	0
cg05605384	X	77395277	TAF9B	0.85614	0	0.807018	3.46999e-05	FALSE	FALSE	0
cg05611801	8	144911427	PUF60;PUF60;PUF60	0.847368	0	0.742105	0.000412963	FALSE	FALSE	0
cg05613234	X	7037456	HDHD1;HDHD1;HDHD1;HDHD1	0.898246	0	0.745614	0.000373971	FALSE	FALSE	0
cg05616278	4	38869436	MIR574;FAM114A1;FAM114A1	0.85614	0	0.733333	0.000524361	FALSE	FALSE	0
cg05622663	3	142311305		0.835088	0	0.650877	0.00322172	FALSE	FALSE	0
cg05629323	X	132351068	TFDP3;TFDP3	0.864912	0	0.864912	0	FALSE	FALSE	0
cg05639624	19	50101012	PRR12	0.845614	0	0.547368	0.0167926	FALSE	FALSE	0
cg05647208	19	18527971		0.836842	0	0.701754	0.00113548	FALSE	FALSE	0
cg05653481	11	67568593	LOC645332	0.87193	0	0.803509	4.23294e-05	FALSE	FALSE	0
cg05653691	1	16175060	FLJ37453;SPEN	0.87193	0	0.638596	0.00403132	FALSE	FALSE	0
cg05656210	5	141660565		0.864912	0	0.873684	0	TRUE	FALSE	0
cg05656763	12	133118770	FBRSL1	0.836842	0	0.303509	0.205987	FALSE	FALSE	0
cg05658771	16	89884179	FANCA;FANCA	0.838596	0	0.633333	0.0044257	FALSE	FALSE	0
cg05669873	3	39149014	GORASP1;TTC21A;TTC21A	0.861404	0	0.663158	0.0025501	FALSE	FALSE	0
cg05679489	X	148552714		0.891228	0	0.77193	0.000163189	FALSE	FALSE	0
cg05683445	16	28303182	SBK1	0.885965	0	0.501754	0.0302985	FALSE	FALSE	0
cg05683999	10	88779135	FAM25A	0.889474	0	0.840351	0	FALSE	FALSE	0
cg05689315	X	51637585	MAGED1;MAGED1;MAGED1	0.863158	0	0.810526	2.79303e-05	TRUE	FALSE	0
cg05690286	16	70148511	PDPR	0.84386	0	0.717544	0.000783412	FALSE	FALSE	0
cg05692422	X	42637044	PPP1R2P9	0.847368	0	0.705263	0.00104802	FALSE	FALSE	0
cg05695927	15	45694626	SPATA5L1;SPATA5L1;SPATA5L1	0.875439	0	0.659649	0.00272906	FALSE	FALSE	0
cg05695959	X	39867476		0.85614	0	0.715789	0.000817526	FALSE	FALSE	0
cg05706649	1	178010970		0.912281	0	0.829825	3.21707e-06	FALSE	FALSE	0
cg05713294	16	66413010	CDH5	0.868421	0	0.370175	0.119405	FALSE	FALSE	0
cg05721374	1	109619308	TAF13	0.878947	0	0.731579	0.000549219	FALSE	TRUE	0
cg05730108	13	99095003	FARP1	0.9	0	0.759649	0.00024543	TRUE	FALSE	0
cg05737644	7	149267907	ZNF767P;ZNF767P	0.863158	0	0.607018	0.00690084	FALSE	FALSE	0
cg05743982	16	30018158	DOC2A	0.842105	0	0.561404	0.0138004	FALSE	FALSE	0
cg05746288	18	48405273	ME2;ME2	0.840351	0	0.775439	0.000143992	FALSE	FALSE	0
cg05753675	7	5821294	RNF216;RNF216	0.847368	0	0.726316	0.000629407	FALSE	FALSE	0
cg05764570	6	32726692	HLA-DQB2	0.880702	0	0.680702	0.00179245	FALSE	FALSE	0
cg05766963	X	129403563	ZNF280C	0.835088	0	0.801754	4.64892e-05	FALSE	FALSE	0
cg05769206	1	28696642	PHACTR4	0.838596	0	0.631579	0.00456396	FALSE	FALSE	0
cg05769334	X	53004551	FAM156A;FAM156A;FAM156A;FAM156A;FAM156A;FAM156A;FAM156A;FAM156A;FAM156A	0.901754	0	0.810526	2.79303e-05	FALSE	FALSE	0
cg05771578	X	100740185	ARMCX4;ARMCX4;ARMCX4;ARMCX4;ARMCX4	0.875439	0	0.791228	7.68918e-05	FALSE	FALSE	0
cg05776084	3	133293427	CDV3;CDV3;CDV3;CDV3	0.845614	0	0.682456	0.00172809	FALSE	FALSE	0
cg05777690	X	106145701	CLDN2;RIPPLY1	0.847368	0	0.652632	0.0031178	FALSE	FALSE	0
cg05779595	13	112836631		0.836842	0	0.619298	0.00563401	FALSE	FALSE	0
cg05784594	X	49160109	GAGE10	0.850877	0	0.675439	0.00199731	FALSE	FALSE	0
cg05788437	3	197476880	FYTTD1;FYTTD1;FYTTD1;KIAA0226	0.847368	0	0.636842	0.00415945	FALSE	FALSE	0
cg05793108	X	118012978		0.884211	0	0.678947	0.00185874	FALSE	FALSE	0
cg05795157	1	145576107	PIAS3	0.838596	0	0.573684	0.0115508	FALSE	FALSE	0
cg05797594	16	85776108	MIR1910;C16orf74	0.838596	0	0.624561	0.00515281	FALSE	FALSE	0
cg05802648	10	81283261		0.863158	0	0.712281	0.000889312	FALSE	FALSE	0
cg05804863	15	79724519	KIAA1024	0.847368	0	0.568421	0.0124753	FALSE	FALSE	0
cg05806018	X	147582520	AFF2;AFF2;AFF2;AFF2;AFF2;AFF2;AFF2;AFF2;AFF2;AFF2	0.905263	0	0.821053	1.21192e-05	TRUE	FALSE	0
cg05806333	16	756033	FBXL16	0.854386	0	0.522807	0.0232737	FALSE	FALSE	0
cg05814909	X	49969080		0.840351	0	0.696491	0.0012776	FALSE	FALSE	0
cg05818000	21	16387536	NRIP1	0.875439	0	0.696491	0.0012776	FALSE	FALSE	0
cg05831907	12	100825168		0.857895	0	0.763158	0.000219354	FALSE	FALSE	0
cg05835545	X	80065003	BRWD3;BRWD3	0.885965	0	0.791228	7.68918e-05	TRUE	FALSE	0
cg05836256	16	1006052	LMF1	0.847368	0	0.340351	0.154058	FALSE	FALSE	0
cg05838149	4	148272333		0.84386	0	0.745614	0.000373971	FALSE	FALSE	0
cg05841722	9	79825187	VPS13A;VPS13A;VPS13A;VPS13A	0.877193	0	0.610526	0.00651729	FALSE	FALSE	0
cg05843631	X	154275146	FUNDC2	0.880702	0	0.580702	0.0104055	FALSE	FALSE	0
cg05845808	19	11457129	CCDC159;TMEM205;TMEM205;TMEM205	0.84386	0	0.717544	0.000783412	FALSE	FALSE	0
cg05851505	8	142221164	SLC45A4	0.864912	0	0.529825	0.0212465	FALSE	FALSE	0
cg05852623	17	42219219	C17orf53;C17orf53	0.84386	0	0.677193	0.00192701	FALSE	FALSE	0
cg05856399	6	109804852	ZBTB24;ZBTB24	0.842105	0	0.763158	0.000219354	FALSE	FALSE	0
cg05858354	3	75835938	ZNF717;ZNF717;ZNF717	0.878947	0	0.687719	0.00154617	FALSE	FALSE	0
cg05859679	5	145724643		0.901754	0	0.670175	0.00222081	FALSE	FALSE	0
cg05860102	15	101088876	PRKXP1	0.852632	0	0.492982	0.0336806	FALSE	FALSE	0
cg05863825	5	115366185		0.864912	0	0.747368	0.000355578	FALSE	FALSE	0
cg05869737	17	58583631	APPBP2;APPBP2	0.877193	0	0.717544	0.000783412	FALSE	FALSE	0
cg05872972	X	43514076	MAOA;MAOA	0.84386	0	0.840351	0	FALSE	FALSE	0
cg05877222	6	156952186		0.838596	0	0.650877	0.00322172	FALSE	FALSE	0
cg05884886	X	133370915	CCDC160	0.892982	0	0.808772	3.12119e-05	FALSE	FALSE	0
cg05884988	8	19115176		0.852632	0	0.768421	0.000184191	FALSE	FALSE	0
cg05889642	X	133931164	FAM122B;FAM122B;FAM122C;FAM122B;FAM122B;FAM122B;FAM122B;FAM122B;FAM122B	0.861404	0	0.77193	0.000163189	TRUE	FALSE	0
cg05891136	8	2014195	MYOM2	0.877193	0	0.74386	0.000393093	FALSE	FALSE	0
cg05894907	5	750226		0.864912	0	0.491228	0.0343915	FALSE	FALSE	0
cg05895137	8	133716144		0.859649	0	0.870175	0	TRUE	FALSE	0
cg05895666	X	118532787	SLC25A43	0.842105	0	0.789474	8.29641e-05	FALSE	FALSE	0
cg05898482	7	152373203	XRCC2;XRCC2	0.854386	0	0.72807	0.000601715	FALSE	FALSE	0
cg05899258	X	34165079		0.857895	0	0.821053	1.21192e-05	FALSE	FALSE	0
cg05899999	X	100603765	TIMM8A;TIMM8A;TIMM8A	0.875439	0	0.785965	9.60713e-05	FALSE	FALSE	0
cg05904344	13	113843426	PCID2;PCID2;PCID2;PCID2;PCID2	0.854386	0	0.421053	0.0739525	TRUE	FALSE	0
cg05905814	X	150151809	HMGB3;HMGB3	0.898246	0	0.864912	0	FALSE	FALSE	0
cg05905876	15	85259824	SEC11A	0.838596	0	0.712281	0.000889312	FALSE	FALSE	0
cg05914696	X	68114669		0.842105	0	0.726316	0.000629407	FALSE	FALSE	0
cg05917732	6	152623304	SYNE1;SYNE1;SYNE1	0.854386	0	0.745614	0.000373971	FALSE	FALSE	0
cg05918124	1	108735713	SLC25A24;SLC25A24	0.854386	0	0.563158	0.0134589	TRUE	FALSE	0
cg05921207	X	110038886	CHRDL1;CHRDL1;CHRDL1;CHRDL1	0.878947	0	0.696491	0.0012776	FALSE	FALSE	0
cg05922993	1	209604397	LOC642587;MIR205	0.847368	0	0.650877	0.00322172	FALSE	FALSE	0
cg05925279	X	109714516		0.835088	0	0.821053	1.21192e-05	TRUE	FALSE	0
cg05934127	19	53229096	ZNF611;ZNF611;ZNF611;ZNF611	0.912281	0	0.542105	0.0180412	FALSE	FALSE	0
cg05935584	X	150151823	HMGB3;HMGB3	0.845614	0	0.733333	0.000524361	TRUE	FALSE	0
cg05936219	4	4228644	OTOP1	0.898246	0	0.759649	0.00024543	FALSE	FALSE	0
cg05939965	X	118983320	UPF3B;UPF3B	0.898246	0	0.763158	0.000219354	FALSE	FALSE	0
cg05940425	14	65240980	SPTB;SPTB	0.868421	0	0.838596	0	TRUE	FALSE	0
cg05941375	X	154299737	BRCC3;BRCC3;BRCC3;MTCP1NB;MTCP1;BRCC3	0.884211	0	0.8	5.08914e-05	TRUE	FALSE	0
cg05947181	X	50557283	SHROOM4;SHROOM4	0.903509	0	0.736842	0.000477298	TRUE	FALSE	0
cg05950570	7	132261418	PLXNA4;PLXNA4;PLXNA4	0.836842	0	0.715789	0.000817526	FALSE	FALSE	0
cg05950854	6	144416850	SF3B5	0.861404	0	0.724561	0.000658097	FALSE	FALSE	0
cg05953285	11	65530530		0.847368	0	0.594737	0.00839121	FALSE	FALSE	0
cg05953927	3	112930782	BOC	0.840351	0	0.568421	0.0124753	FALSE	FALSE	0
cg05957603	22	41252784	XPNPEP3;ST13	0.838596	0	0.670175	0.00222081	FALSE	TRUE	0
cg05961492	22	47459539	TBC1D22A;TBC1D22A;TBC1D22A;TBC1D22A;TBC1D22A	0.912281	0	0.696491	0.0012776	TRUE	FALSE	0
cg05963354	7	525943		0.863158	0	0.622807	0.00530932	FALSE	FALSE	0
cg05965444	X	134049328	MOSPD1	0.910526	0	0.784211	0.00010313	TRUE	FALSE	0
cg05972899	X	149380603		0.852632	0	0.592982	0.00862403	FALSE	FALSE	0
cg05973688	Y	2692946		0.903509	0	0.629825	0.00470573	TRUE	FALSE	0
cg05975021	X	11310708	ARHGAP6;AMELX;AMELX;AMELX;ARHGAP6	0.854386	0	0.810526	2.79303e-05	FALSE	FALSE	0
cg05976695	10	7860543	TAF3	0.868421	0	0.775439	0.000143992	FALSE	FALSE	0
cg05984320	8	144373269	ZNF696	0.863158	0	0.72807	0.000601715	FALSE	FALSE	0
cg05985164	12	57881757	MARS	0.892982	0	0.526316	0.0222416	FALSE	FALSE	0
cg05986831	13	20135998		0.836842	0	0.477193	0.0405147	FALSE	FALSE	0
cg05988267	16	21831868	RRN3P1	0.85614	0	0.698246	0.00122872	FALSE	FALSE	0
cg06002245	9	140149498	NELFB	0.87193	0	0.692982	0.00138008	FALSE	FALSE	0
cg06002470	X	124339860		0.849123	0	0.659649	0.00272906	FALSE	FALSE	0
cg06002485	6	119253338	MCM9;MCM9	0.9	0	0.508772	0.0277917	FALSE	FALSE	0
cg06002687	8	80783997		0.852632	0	0.65614	0.00291815	TRUE	FALSE	0
cg06005549	X	130902200	FIRRE	0.836842	0	0.715789	0.000817526	TRUE	FALSE	0
cg06010327	16	69458454	CYB5B	0.9	0	0.849123	0	FALSE	FALSE	0
cg06010667	6	169309818		0.845614	0	0.635088	0.00429089	FALSE	FALSE	0
cg06012621	2	218296732	DIRC3	0.891228	0	0.868421	0	FALSE	FALSE	0
cg06012992	7	63032734		0.870175	0	0.624561	0.00515281	FALSE	TRUE	0
cg06013788	5	135355037		0.845614	0	0.72807	0.000601715	TRUE	FALSE	0
cg06016857	9	120571		0.852632	0	0.721053	0.000718586	FALSE	FALSE	0
cg06024075	X	24480790		0.864912	0	0.8	5.08914e-05	FALSE	FALSE	0
cg06025043	X	49132126	PPP1R3F;PPP1R3F	0.838596	0	0.692982	0.00138008	FALSE	FALSE	0
cg06027835	X	48456564	WDR13;WDR13;WDR13;WDR13	0.847368	0	0.835088	0	FALSE	FALSE	0
cg06041559	X	9982417	WWC3	0.873684	0	0.861404	0	FALSE	FALSE	0
cg06051391	X	131352293	RAP2C	0.864912	0	0.792982	7.1125e-05	FALSE	FALSE	0
cg06053110	X	51636681	MAGED1;MAGED1;MAGED1	0.892982	0	0.791228	7.68918e-05	FALSE	FALSE	0
cg06053506	X	13907216	GPM6B	0.840351	0	0.694737	0.00132804	FALSE	FALSE	0
cg06059109	9	111806254	TMEM245	0.85614	0	0.422807	0.0726631	FALSE	FALSE	0
cg06059755	12	66218047	HMGA2;HMGA2;HMGA2;HMGA2;RPSAP52	0.840351	0	0.784211	0.00010313	FALSE	FALSE	0
cg06060457	22	43157042		0.878947	0	0.589474	0.00910547	TRUE	FALSE	0
cg06063856	13	52378530	DHRS12;DHRS12	0.850877	0	0.722807	0.000687814	FALSE	FALSE	0
cg06065508	11	6495259	TRIM3;TRIM3	0.838596	0	0.685965	0.00160499	FALSE	FALSE	0
cg06068557	10	87515969	GRID1	0.836842	0	0.631579	0.00456396	FALSE	FALSE	0
cg06079273	8	97247865	UQCRB	0.884211	0	0.557895	0.0145044	FALSE	FALSE	0
cg06079646	X	24711474	POLA1	0.842105	0	0.659649	0.00272906	FALSE	FALSE	0
cg06084336	X	47050809	UBA1	0.859649	0	0.766667	0.000195408	FALSE	FALSE	0
cg06086634	17	48585465	MYCBPAP	0.882456	0	0.659649	0.00272906	FALSE	FALSE	0
cg06093412	X	47518594	LOC100133957;LOC100133957;UXT;UXT	0.882456	0	0.803509	4.23294e-05	FALSE	FALSE	0
cg06093861	7	75780412		0.894737	0	0.738596	0.000455042	TRUE	FALSE	0
cg06098232	X	149106699	LOC100272228;CXorf40B;CXorf40B	0.878947	0	0.817544	1.67023e-05	FALSE	FALSE	0
cg06100680	8	104089023		0.898246	0	0.668421	0.00229968	FALSE	FALSE	0
cg06102971	X	17878442	RAI2	0.857895	0	0.791228	7.68918e-05	TRUE	FALSE	0
cg06104510	X	19002482	PHKA2	0.850877	0	0.752632	0.000304546	FALSE	FALSE	0
cg06104959	X	67913324	STARD8;STARD8;STARD8	0.836842	0	0.812281	2.48466e-05	FALSE	FALSE	0
cg06108461	20	60628389	TAF4	0.882456	0	0.657895	0.00282231	FALSE	TRUE	0
cg06110954	X	47221455		0.835088	0	0.82807	4.73137e-06	FALSE	FALSE	0
cg06112835	11	68658793	MRPL21;MRPL21	0.840351	0	0.54386	0.0176169	FALSE	TRUE	0
cg06124711	X	153640000	TAZ;DNASE1L1;DNASE1L1;TAZ;TAZ;TAZ;DNASE1L1;TAZ;TAZ;TAZ;TAZ;TAZ	0.9	0	0.782456	0.000110543	FALSE	FALSE	0
cg06126323	X	68836571	EDA;EDA;EDA;EDA;EDA;EDA	0.850877	0	0.864912	0	FALSE	FALSE	0
cg06134910	10	26730561	APBB1IP	0.907018	0	0.615789	0.00597476	TRUE	FALSE	0
cg06143315	2	242950311		0.877193	0	0.782456	0.000110543	FALSE	FALSE	0
cg06144311	7	4814294	KIAA0415	0.868421	0	0.642105	0.00378473	FALSE	TRUE	0
cg06144608	X	149737646	MTM1	0.85614	0	0.87193	0	FALSE	FALSE	0
cg06144825	X	80457687	HMGN5;SH3BGRL;SH3BGRL	0.836842	0	0.829825	3.21707e-06	FALSE	FALSE	0
cg06152434	X	139585460	SOX3;SOX3	0.857895	0	0.729825	0.000574995	TRUE	FALSE	0
cg06156260	1	25292412	RUNX3	0.898246	0	0.757895	0.000259311	FALSE	TRUE	0
cg06161836	8	100025390	VPS13B;VPS13B;VPS13B;VPS13B;VPS13B	0.870175	0	0.382456	0.106931	FALSE	FALSE	0
cg06164717	X	136114030	GPR101	0.863158	0	0.750877	0.000320886	TRUE	FALSE	0
cg06169048	3	154901216	MME;MME;MME;MME	0.840351	0	0.519298	0.0243438	FALSE	FALSE	0
cg06172626	X	48398133	TBC1D25;TBC1D25	0.84386	0	0.677193	0.00192701	FALSE	FALSE	0
cg06174247	X	16871023	RBBP7;RBBP7	0.894737	0	0.640351	0.00390643	FALSE	FALSE	0
cg06178309	X	14048147	GEMIN8;GEMIN8;GEMIN8	0.9	0	0.798246	5.5546e-05	FALSE	FALSE	0
cg06180910	22	24382663	GSTT1	0.868421	0	0.577193	0.010966	TRUE	FALSE	0
cg06183684	21	40383759		0.857895	0	0.512281	0.0266018	FALSE	FALSE	0
cg06185870	X	54666407		0.891228	0	0.735088	0.000500396	TRUE	FALSE	0
cg06190216	X	152771994	BGN	0.857895	0	0.757895	0.000259311	FALSE	FALSE	0
cg06200860	3	112738545	C3orf17;C3orf17;C3orf17;C3orf17	0.868421	0	0.714035	0.000852816	FALSE	FALSE	0
cg06206449	X	118708409	UBE2A;UBE2A	0.84386	0	0.810526	2.79303e-05	FALSE	FALSE	0
cg06211877	17	79268988	SLC38A10;SLC38A10;SLC38A10;SLC38A10	0.836842	0	0.487719	0.0358489	FALSE	FALSE	0
cg06212762	9	130254679	LRSAM1;LRSAM1;LRSAM1;LRSAM1	0.849123	0	0.664912	0.00246427	TRUE	FALSE	0
cg06213463	16	56623215	MT3	0.845614	0	0.735088	0.000500396	FALSE	FALSE	0
cg06215509	X	38141750	RPGR	0.847368	0	0.592982	0.00862403	FALSE	FALSE	0
cg06223984	4	69441751		0.842105	0	0.777193	0.000135032	TRUE	FALSE	0
cg06228453	X	106242522	MORC4;MORC4	0.850877	0	0.792982	7.1125e-05	TRUE	FALSE	0
cg06230647	X	49392145		0.905263	0	0.440351	0.0606897	FALSE	FALSE	0
cg06231618	X	40504059	CXorf38	0.889474	0	0.729825	0.000574995	TRUE	FALSE	0
cg06242242	7	766104	PRKAR1B;PRKAR1B;PRKAR1B;HEATR2	0.845614	0	0.75614	0.000273778	FALSE	TRUE	0
cg06265809	14	101525784	MIR496;MIR154	0.85614	0	0.659649	0.00272906	FALSE	FALSE	0
cg06269080	X	19003031	PHKA2	0.842105	0	0.8	5.08914e-05	TRUE	FALSE	0
cg06273010	11	119187868	MCAM	0.847368	0	0.707018	0.00100637	FALSE	FALSE	0
cg06276798	X	39957817	BCOR;BCOR;BCOR;BCOR	0.840351	0	0.861404	0	FALSE	FALSE	0
cg06276864	4	190802469		0.875439	0	0.766667	0.000195408	FALSE	FALSE	0
cg06277900	16	67198029	HSF4;HSF4;FBXL8	0.859649	0	0.759649	0.00024543	FALSE	FALSE	0
cg06279067	1	116307845	CASQ2	0.859649	0	0.705263	0.00104802	TRUE	FALSE	0
cg06281714	6	32415210		0.891228	0	0.945614	5.56152e-06	FALSE	FALSE	0
cg06282462	4	128886421	MFSD8;C4orf29	0.842105	0	0.585965	0.00960858	FALSE	FALSE	0
cg06284528	16	31069465		0.850877	0	0.682456	0.00172809	FALSE	FALSE	0
cg06295137	7	92102186		0.889474	0	0.677193	0.00192701	FALSE	FALSE	0
cg06295352	X	130037150	ENOX2;ENOX2;ENOX2;ENOX2	0.870175	0	0.819298	1.4331e-05	TRUE	FALSE	0
cg06300944	X	153141270	L1CAM;L1CAM;L1CAM	0.868421	0	0.689474	0.0014891	FALSE	FALSE	0
cg06304546	20	32448765		0.866667	0	0.519298	0.0243438	FALSE	TRUE	0
cg06307915	16	57004888	CETP;CETP	0.849123	0	0.410526	0.0820568	TRUE	FALSE	0
cg06312785	3	135685131	PPP2R3A	0.857895	0	0.570175	0.0121607	FALSE	FALSE	0
cg06314665	15	66245419	MEGF11	0.847368	0	0.787719	8.93533e-05	FALSE	FALSE	0
cg06316979	X	62974424	ARHGEF9;ARHGEF9;ARHGEF9;ARHGEF9;ARHGEF9	0.873684	0	0.868421	0	TRUE	FALSE	0
cg06329735	11	75139390	KLHL35	0.854386	0	0.754386	0.00028885	FALSE	FALSE	0
cg06334238	X	153284899	IRAK1;IRAK1;IRAK1	0.850877	0	0.782456	0.000110543	TRUE	FALSE	0
cg06344265	11	120530973	GRIK4	0.847368	0	0.742105	0.000412963	TRUE	FALSE	0
cg06349179	1	205744577	RAB7L1;RAB7L1;RAB7L1;RAB7L1;RAB7L1;RAB7L1;RAB7L1;RAB7L1	0.861404	0	0.74386	0.000393093	FALSE	FALSE	0
cg06349546	22	43011285	POLDIP3;RNU12;POLDIP3	0.901754	0	0.85614	0	FALSE	FALSE	0
cg06357691	11	64072954	ESRRA	0.847368	0	0.807018	3.46999e-05	FALSE	FALSE	0
cg06358752	X	102531869	TCEAL5	0.838596	0	0.735088	0.000500396	FALSE	FALSE	0
cg06368978	1	2249896		0.859649	0	0.654386	0.00301662	FALSE	FALSE	0
cg06373764	10	61469820	SLC16A9	0.850877	0	0.652632	0.0031178	FALSE	FALSE	0
cg06379361	12	120755460		0.880702	0	0.764912	0.000207123	TRUE	TRUE	0
cg06380338	6	27861363	HIST1H2AM;HIST1H2BO	0.889474	0	0.607018	0.00690084	FALSE	FALSE	0
cg06383088	9	100459634	XPA;XPA;XPA	0.85614	0	0.52807	0.0217395	FALSE	FALSE	0
cg06389521	1	226016396	EPHX1;EPHX1;EPHX1	0.859649	0	0.801754	4.64892e-05	TRUE	FALSE	0
cg06393529	6	149027558		0.85614	0	0.887719	0	TRUE	FALSE	0
cg06403392	X	118739909	NKRF;NKRF	0.85614	0	0.698246	0.00122872	FALSE	FALSE	0
cg06403901	14	51011528	ATL1	0.870175	0	0.792982	7.1125e-05	TRUE	FALSE	0
cg06406822	5	175955056	RNF44	0.859649	0	0.633333	0.0044257	FALSE	FALSE	0
cg06407043	12	8403616		0.9	0	0.8	5.08914e-05	FALSE	FALSE	0
cg06407366	X	13707511	RAB9A	0.882456	0	0.67193	0.00214416	FALSE	FALSE	0
cg06408185	X	18443714	CDKL5	0.859649	0	0.847368	0	FALSE	FALSE	0
cg06408301	X	37208607	PRRG1;PRRG1;PRRG1;PRRG1	0.836842	0	0.819298	1.4331e-05	FALSE	FALSE	0
cg06411441	X	100307072	TRMT2B;TRMT2B;TRMT2B;TRMT2B;TRMT2B;TRMT2B;TRMT2B;TRMT2B	0.838596	0	0.794737	6.56523e-05	FALSE	FALSE	0
cg06416885	4	100009900	ADH5;ADH5	0.850877	0	0.726316	0.000629407	FALSE	FALSE	0
cg06428055	X	129243872	ELF4;ELF4	0.840351	0	0.752632	0.000304546	TRUE	FALSE	0
cg06428288	X	15511530	PIR;PIR	0.870175	0	0.814035	2.19525e-05	FALSE	FALSE	0
cg06430688	2	242490217		0.891228	0	0.649123	0.00332846	TRUE	FALSE	0
cg06437703	8	37914619	EIF4EBP1	0.857895	0	0.642105	0.00378473	FALSE	TRUE	0
cg06437931	1	38180356		0.863158	0	0.747368	0.000355578	TRUE	FALSE	0
cg06439370	19	53360728	ZNF468;ZNF468	0.877193	0	0.777193	0.000135032	FALSE	FALSE	0
cg06441001	16	89307764		0.861404	0	0.733333	0.000524361	FALSE	TRUE	0
cg06452642	19	13875641	MRI1;MRI1	0.835088	0	0.661404	0.00263834	FALSE	FALSE	0
cg06457357	X	56259243	KLF8;KLF8;KLF8	0.838596	0	0.801754	4.64892e-05	FALSE	FALSE	0
cg06469252	X	136113985	GPR101	0.910526	0	0.829825	3.21707e-06	FALSE	FALSE	0
cg06478094	2	47630251	MSH2	0.861404	0	0.62807	0.00485109	FALSE	FALSE	0
cg06481639	22	41940642	POLR3H;POLR3H;POLR3H	0.849123	0	0.573684	0.0115508	FALSE	FALSE	0
cg06481993	4	120298494		0.896491	0	0.622807	0.00530932	FALSE	FALSE	0
cg06482328	X	119385834	ZBTB33	0.85614	0	0.824561	8.14662e-06	TRUE	FALSE	0
cg06488081	1	17248394	CROCC	0.84386	0	0.810526	2.79303e-05	FALSE	TRUE	0
cg06493824	X	117973514	LINC01285	0.849123	0	0.824561	8.14662e-06	FALSE	FALSE	0
cg06494135	16	85968843		0.868421	0	0.796491	6.04628e-05	TRUE	FALSE	0
cg06495728	3	187462459	BCL6	0.875439	0	0.678947	0.00185874	FALSE	FALSE	0
cg06495764	16	3507895	NAA60;NAA60;NAA60	0.857895	0	0.610526	0.00651729	FALSE	FALSE	0
cg06504563	X	64754017	LAS1L;LAS1L;LAS1L	0.870175	0	0.712281	0.000889312	TRUE	FALSE	0
cg06510410	3	196594695	SENP5	0.849123	0	0.547368	0.0167926	FALSE	FALSE	0
cg06511189	X	152864830	FAM58A;FAM58A	0.84386	0	0.719298	0.000750442	FALSE	FALSE	0
cg06513359	X	47004280	NDUFB11;RBM10;NDUFB11;RBM10;NDUFB11;NDUFB11	0.840351	0	0.798246	5.5546e-05	TRUE	FALSE	0
cg06515734	16	87749852	KLHDC4	0.875439	0	0.82807	4.73137e-06	FALSE	FALSE	0
cg06520821	10	135233123	MTG1	0.84386	0	0.67193	0.00214416	FALSE	FALSE	0
cg06522219	X	67879834	STARD8;STARD8	0.907018	0	0.764912	0.000207123	FALSE	FALSE	0
cg06527016	16	55862191	CES1;CES1;CES1	0.835088	0	0.619298	0.00563401	FALSE	FALSE	0
cg06530638	2	70647901		0.884211	0	0.578947	0.0106827	FALSE	FALSE	0
cg06530742	19	41223047	ITPKC;ADCK4	0.847368	0	0.626316	0.00500009	FALSE	FALSE	0
cg06531250	1	147380445	GJA8	0.864912	0	0.573684	0.0115508	FALSE	FALSE	0
cg06535290	16	85716163	GINS2	0.885965	0	0.752632	0.000304546	FALSE	FALSE	0
cg06536614	5	135416381	MIR886	0.84386	0	0.650877	0.00322172	FALSE	FALSE	0
cg06550894	8	22245976	SLC39A14;SLC39A14;SLC39A14;SLC39A14	0.838596	0	0.685965	0.00160499	FALSE	FALSE	0
cg06551387	21	38071323	SIM2;SIM2	0.857895	0	0.473684	0.0421715	FALSE	FALSE	0
cg06552368	11	118972898	DPAGT1	0.842105	0	0.714035	0.000852816	FALSE	TRUE	0
cg06558166	X	132549003	GPC4;GPC4	0.854386	0	0.815789	1.92403e-05	TRUE	FALSE	0
cg06562718	8	1789169	ARHGEF10	0.889474	0	0.789474	8.29641e-05	FALSE	FALSE	0
cg06583380	X	40804336		0.887719	0	0.791228	7.68918e-05	FALSE	FALSE	0
cg06585820	13	80915122	SPRY2	0.840351	0	0.698246	0.00122872	FALSE	FALSE	0
cg06590444	19	51293054	ACPT	0.835088	0	0.591228	0.00886209	TRUE	FALSE	0
cg06591892	19	47353883	AP2S1;AP2S1	0.878947	0	0.62807	0.00485109	FALSE	FALSE	0
cg06594395	14	74180563	PNMA1;PNMA1	0.898246	0	0.659649	0.00272906	FALSE	FALSE	0
cg06595448	7	50727315	GRB10;GRB10;GRB10;GRB10	0.884211	0	0.514035	0.0260222	FALSE	FALSE	0
cg06596356	9	137661910	COL5A1;COL5A1	0.877193	0	0.522807	0.0232737	TRUE	FALSE	0
cg06598332	17	46114811	MIR152;COPZ2	0.838596	0	0.366667	0.123156	FALSE	FALSE	0
cg06598393	6	166311188		0.868421	0	0.833333	5.45502e-07	FALSE	FALSE	0
cg06609474	14	106444697		0.875439	0	0.629825	0.00470573	FALSE	FALSE	0
cg06609793	X	48937690	WDR45;WDR45	0.889474	0	0.849123	0	TRUE	FALSE	0
cg06614969	X	54835405	MAGED2;MAGED2;MAGED2	0.905263	0	0.782456	0.000110543	TRUE	FALSE	0
cg06616857	X	153719132	SLC10A3;SLC10A3;SLC10A3	0.857895	0	0.747368	0.000355578	TRUE	FALSE	0
cg06619150	7	76097214	DTX2;DTX2;DTX2	0.875439	0	0.72807	0.000601715	FALSE	FALSE	0
cg06630098	19	16683316	SLC35E1	0.870175	0	0.663158	0.0025501	FALSE	FALSE	0
cg06647218	16	68279240	PLA2G15	0.835088	0	0.694737	0.00132804	FALSE	FALSE	0
cg06650776	X	102632072	NGFRAP1;NGFRAP1;NGFRAP1	0.87193	0	0.794737	6.56523e-05	TRUE	FALSE	0
cg06655100	X	56259373	KLF8;KLF8;KLF8	0.87193	0	0.842105	0	TRUE	FALSE	0
cg06657741	X	135067456	SLC9A6;SLC9A6	0.847368	0	0.745614	0.000373971	FALSE	FALSE	0
cg06671561	19	36139035	COX6B1	0.859649	0	0.707018	0.00100637	FALSE	FALSE	0
cg06675147	16	86543532	FOXF1	0.884211	0	0.515789	0.0254528	FALSE	FALSE	0
cg06675660	X	128657364	SMARCA1;SMARCA1;SMARCA1;SMARCA1	0.840351	0	0.822807	1.006e-05	TRUE	FALSE	0
cg06700506	Y	15024898	DDX3Y;DDX3Y;DDX3Y	0.847368	0	0.761404	0.000232117	FALSE	FALSE	0
cg06701726	X	133119645	GPC3;GPC3;GPC3;GPC3;GPC3;GPC3;GPC3;GPC3	0.842105	0	0.729825	0.000574995	TRUE	FALSE	0
cg06702733	4	57397016		0.835088	0	0.594737	0.00839121	FALSE	FALSE	0
cg06704717	X	73640484	SLC16A2	0.864912	0	0.840351	0	TRUE	FALSE	0
cg06709277	16	56225900	LOC283856;GNAO1;GNAO1;GNAO1;GNAO1	0.836842	0	0.654386	0.00301662	FALSE	FALSE	0
cg06710937	13	23489940		0.903509	0	0.650877	0.00322172	FALSE	FALSE	0
cg06718159	17	27338116		0.885965	0	0.761404	0.000232117	FALSE	FALSE	0
cg06721546	5	1594808	SDHAP3	0.859649	0	0.796491	6.04628e-05	FALSE	TRUE	0
cg06728147	10	3200291	PITRM1;PITRM1;PITRM1	0.850877	0	0.636842	0.00415945	TRUE	FALSE	0
cg06728989	X	44288825		0.868421	0	0.742105	0.000412963	FALSE	FALSE	0
cg06731599	X	40440704	ATP6AP2	0.866667	0	0.829825	3.21707e-06	TRUE	FALSE	0
cg06733925	14	65746397		0.845614	0	0.55614	0.0148671	FALSE	FALSE	0
cg06746449	12	131267556		0.857895	0	0.538596	0.0189143	FALSE	FALSE	0
cg06751705	7	43769116	C7orf44	0.87193	0	0.735088	0.000500396	FALSE	FALSE	0
cg06755661	1	43919542	HYI	0.836842	0	0.680702	0.00179245	FALSE	FALSE	0
cg06758240	11	85654547		0.901754	0	0.803509	4.23294e-05	FALSE	FALSE	0
cg06759629	4	25090198		0.849123	0	0.696491	0.0012776	FALSE	FALSE	0
cg06762527	X	154033810	MPP1;MPP1;MPP1;MPP1	0.852632	0	0.868421	0	TRUE	FALSE	0
cg06766860	12	132863983	GALNT9	0.875439	0	0.689474	0.0014891	FALSE	FALSE	0
cg06774787	X	56258973	KLF8;KLF8;KLF8;KLF8	0.852632	0	0.775439	0.000143992	TRUE	FALSE	0
cg06779458	X	152586916		0.863158	0	0.84386	0	FALSE	FALSE	0
cg06779738	8	182266	RPL23AP53;ZNF596;ZNF596;ZNF596;ZNF596	0.889474	0	0.663158	0.0025501	FALSE	FALSE	0
cg06779964	22	40037729	CACNA1I;CACNA1I	0.861404	0	0.759649	0.00024543	FALSE	FALSE	0
cg06780766	X	133930788	FAM122B;FAM122B;FAM122B;FAM122B;FAM122C;FAM122B;FAM122B	0.85614	0	0.814035	2.19525e-05	FALSE	FALSE	0
cg06783548	X	47479436	SYN1;SYN1	0.884211	0	0.819298	1.4331e-05	FALSE	FALSE	0
cg06789340	6	26000384		0.875439	0	0.498246	0.0316174	FALSE	TRUE	0
cg06796204	X	71351792	NHSL2;RGAG4	0.840351	0	0.801754	4.64892e-05	TRUE	FALSE	0
cg06802841	1	145477319	LIX1L	0.850877	0	0.522807	0.0232737	FALSE	FALSE	0
cg06809923	6	169093117		0.875439	0	0.782456	0.000110543	TRUE	FALSE	0
cg06813297	12	132537251	EP400	0.907018	0	0.629825	0.00470573	TRUE	FALSE	0
cg06818555	X	20287610		0.873684	0	0.791228	7.68918e-05	FALSE	FALSE	0
cg06821929	16	90114307	LOC100130015;LOC100130015	0.849123	0	0.67193	0.00214416	FALSE	TRUE	0
cg06824156	8	23228723	LOXL2	0.850877	0	0.645614	0.00355061	TRUE	FALSE	0
cg06829893	2	27346593	ABHD1	0.907018	0	0.687719	0.00154617	FALSE	FALSE	0
cg06831000	X	144712901		0.878947	0	0.526316	0.0222416	FALSE	FALSE	0
cg06842518	3	197476315	FYTTD1;KIAA0226;KIAA0226;FYTTD1;FYTTD1	0.87193	0	0.631579	0.00456396	FALSE	FALSE	0
cg06844209	11	66629644	PC;PC;PC	0.84386	0	0.461404	0.0483916	FALSE	FALSE	0
cg06844213	16	29995217	TAOK2;TAOK2;TAOK2	0.892982	0	0.838596	0	TRUE	FALSE	0
cg06844689	12	125549727	AACS	0.835088	0	0.647368	0.00343807	FALSE	FALSE	0
cg06849002	7	4334400		0.908772	0	0.319298	0.182451	TRUE	FALSE	0
cg06855731	Y	9931079		0.877193	0	0.745614	0.000373971	TRUE	FALSE	0
cg06868413	2	80325984	CTNNA2;CTNNA2	0.850877	0	0.680702	0.00179245	FALSE	FALSE	0
cg06868414	18	56746125		0.85614	0	0.840351	0	TRUE	FALSE	0
cg06870868	6	32812663	PSMB8;PSMB8;PSMB8	0.836842	0	0.554386	0.0152372	FALSE	FALSE	0
cg06879608	12	124787404	FAM101A	0.857895	0	0.759649	0.00024543	FALSE	FALSE	0
cg06889571	10	1416791	ADARB2	0.894737	0	0.801754	4.64892e-05	FALSE	TRUE	0
cg06895230	8	128959420	TMEM75;PVT1	0.866667	0	0.840351	0	FALSE	FALSE	0
cg06895515	X	47050149	UBA1	0.859649	0	0.740351	0.000433605	FALSE	FALSE	0
cg06895796	5	1883948	IRX4;IRX4;IRX4;IRX4;IRX4	0.880702	0	0.787719	8.93533e-05	FALSE	FALSE	0
cg06899582	X	129402809	ZNF280C;ZNF280C	0.866667	0	0.766667	0.000195408	FALSE	FALSE	0
cg06902235	19	53139159	ZNF83;ZNF83;ZNF83;ZNF83;ZNF83;ZNF83;ZNF83;ZNF83	0.847368	0	0.780702	0.000118322	FALSE	FALSE	0
cg06905744	6	36954389	MTCH1;MTCH1;MTCH1	0.905263	0	0.624561	0.00515281	FALSE	FALSE	0
cg06921456	X	153189769	ARHGAP4;ARHGAP4	0.85614	0	0.710526	0.000927047	TRUE	FALSE	0
cg06921685	X	119005865	NDUFA1;RNF113A;NDUFA1	0.840351	0	0.822807	1.006e-05	FALSE	FALSE	0
cg06928346	12	12849096	GPR19;GPR19	0.878947	0	0.764912	0.000207123	FALSE	FALSE	0
cg06929530	7	102136630	RASA4B	0.838596	0	0.785965	9.60713e-05	FALSE	FALSE	0
cg06936709	X	83757476	HDX	0.875439	0	0.789474	8.29641e-05	TRUE	FALSE	0
cg06937348	6	31474185	MICB	0.901754	0	0.729825	0.000574995	FALSE	FALSE	0
cg06944922	X	38186842	RPGR;RPGR	0.898246	0	0.847368	0	FALSE	FALSE	0
cg06945747	19	48324309	CRX	0.854386	0	0.482456	0.0381257	FALSE	FALSE	0
cg06947205	1	9323884	H6PD	0.852632	0	0.680702	0.00179245	FALSE	FALSE	0
cg06947241	X	2733632	XG;XG;XG	0.894737	0	0.847368	0	FALSE	FALSE	0
cg06947608	10	128113825	C10orf90	0.868421	0	0.668421	0.00229968	FALSE	FALSE	0
cg06948885	14	81980218	SEL1L	0.866667	0	0.489474	0.0351142	FALSE	FALSE	0
cg06950873	5	170814540	NPM1;NPM1;NPM1	0.870175	0	0.587719	0.00935427	FALSE	FALSE	0
cg06952379	6	170483501		0.875439	0	0.729825	0.000574995	FALSE	FALSE	0
cg06952910	4	122744652	CCNA2	0.835088	0	0.385965	0.10355	FALSE	FALSE	0
cg06961873	1	25825780	TMEM57	0.849123	0	0.8	5.08914e-05	TRUE	FALSE	0
cg06962620	21	46360149	C21orf67;C21orf70;C21orf67	0.836842	0	0.701754	0.00113548	FALSE	FALSE	0
cg06964654	X	139590383		0.838596	0	0.792982	7.1125e-05	TRUE	FALSE	0
cg06970220	1	156163860	SLC25A44;SLC25A44	0.836842	0	0.745614	0.000373971	FALSE	TRUE	0
cg06977068	22	29469014	KREMEN1;KREMEN1	0.836842	0	0.501754	0.0302985	FALSE	FALSE	0
cg06978021	20	61493312	TCFL5	0.903509	0	0.768421	0.000184191	FALSE	FALSE	0
cg06979164	15	91530190	PRC1-AS1;PRC1;PRC1;PRC1	0.845614	0	0.638596	0.00403132	FALSE	FALSE	0
cg06979386	16	78027119		0.905263	0	0.817544	1.67023e-05	FALSE	FALSE	0
cg06988099	16	23080572	USP31	0.850877	0	0.675439	0.00199731	FALSE	FALSE	0
cg06992877	1	245133496	LOC101928068;EFCAB2;EFCAB2;EFCAB2;EFCAB2	0.857895	0	0.852632	0	FALSE	FALSE	0
cg07006325	16	66835772	CCDC79	0.861404	0	0.463158	0.0474618	FALSE	FALSE	0
cg07010359	1	20209420	OTUD3	0.836842	0	0.721053	0.000718586	FALSE	FALSE	0
cg07022554	16	1993481	SEPX1	0.835088	0	0.707018	0.00100637	FALSE	FALSE	0
cg07023501	7	155948572		0.907018	0	0.585965	0.00960858	FALSE	FALSE	0
cg07033961	5	760251		0.880702	0	0.47193	0.0430195	FALSE	FALSE	0
cg07037055	13	97499552		0.894737	0	0.766667	0.000195408	TRUE	FALSE	0
cg07038409	X	47509941	ELK1;ELK1;ELK1;ELK1	0.908772	0	0.82807	4.73137e-06	FALSE	FALSE	0
cg07041535	1	56879518		0.882456	0	0.85614	0	FALSE	FALSE	0
cg07049424	X	135959015	RBMX;RBMX;RBMX;RBMX	0.894737	0	0.785965	9.60713e-05	FALSE	FALSE	0
cg07057532	22	49801164		0.85614	0	0.835088	0	FALSE	FALSE	0
cg07060183	17	56065973	VEZF1	0.901754	0	0.715789	0.000817526	FALSE	FALSE	0
cg07061359	1	145303926	NBPF10;NBPF10;NBPF25P;NBPF25P;NBPF20;NBPF9;NBPF10;NBPF10	0.84386	0	0.757895	0.000259311	FALSE	FALSE	0
cg07068604	4	139499241		0.863158	0	0.845614	0	FALSE	FALSE	0
cg07071690	14	105416582	AHNAK2	0.864912	0	0.708772	0.000966054	FALSE	TRUE	0
cg07072172	14	100048803	CCDC85C	0.877193	0	0.712281	0.000889312	TRUE	FALSE	0
cg07079860	6	3094314	RIPK1	0.866667	0	0.550877	0.0159996	FALSE	FALSE	0
cg07086565	X	153236942	TMEM187;HCFC1	0.85614	0	0.807018	3.46999e-05	FALSE	FALSE	0
cg07089242	X	149106617	LOC100272228;CXorf40B;CXorf40B	0.859649	0	0.826316	6.37252e-06	TRUE	FALSE	0
cg07098405	17	37763000	NEUROD2	0.836842	0	0.691228	0.00143375	FALSE	FALSE	0
cg07099627	19	11466020	LPPR2;LPPR2	0.87193	0	0.636842	0.00415945	FALSE	FALSE	0
cg07102913	5	140593443	PCDHB13	0.85614	0	0.740351	0.000433605	FALSE	FALSE	0
cg07103917	11	20385628	HTATIP2;HTATIP2;HTATIP2;HTATIP2;HTATIP2;HTATIP2	0.868421	0	0.561404	0.0138004	FALSE	FALSE	0
cg07109010	X	48958025	WDR45;WDR45	0.835088	0	0.821053	1.21192e-05	FALSE	FALSE	0
cg07115324	X	107020327	TSC22D3	0.847368	0	0.664912	0.00246427	FALSE	FALSE	0
cg07115537	X	37404647		0.910526	0	0.645614	0.00355061	FALSE	FALSE	0
cg07118054	X	72062474		0.857895	0	0.694737	0.00132804	FALSE	FALSE	0
cg07119157	1	1142932	TNFRSF18;TNFRSF18;TNFRSF18	0.835088	0	0.482456	0.0381257	TRUE	TRUE	0
cg07126095	16	84651816	COTL1	0.861404	0	0.745614	0.000373971	FALSE	FALSE	0
cg07127150	X	7974726		0.912281	0	0.891228	0	FALSE	FALSE	0
cg07127534	5	9119105	SEMA5A	0.836842	0	0.757895	0.000259311	FALSE	FALSE	0
cg07131157	12	52702318	KRT86	0.901754	0	0.764912	0.000207123	FALSE	FALSE	0
cg07134666	6	29648400		0.891228	0	0.612281	0.00633216	TRUE	FALSE	0
cg07142859	1	52870289	ORC1L;PRPF38A;PRPF38A	0.885965	0	0.696491	0.0012776	FALSE	FALSE	0
cg07148716	13	20806539	GJB6;GJB6;GJB6;GJB6	0.835088	0	0.8	5.08914e-05	FALSE	FALSE	0
cg07151865	11	75760035	UVRAG	0.887719	0	0.629825	0.00470573	FALSE	FALSE	0
cg07151929	X	30907787	MAP3K7IP3	0.887719	0	0.877193	0	FALSE	FALSE	0
cg07153944	X	48660373	HDAC6	0.847368	0	0.789474	8.29641e-05	FALSE	FALSE	0
cg07156742	3	142666759		0.896491	0	0.815789	1.92403e-05	FALSE	FALSE	0
cg07156820	17	54821256		0.842105	0	0.750877	0.000320886	FALSE	TRUE	0
cg07157058	6	7390083	CAGE1;CAGE1;RIOK1;RIOK1;CAGE1	0.870175	0	0.531579	0.0207625	FALSE	FALSE	0
cg07158503	5	135415693		0.861404	0	0.852632	0	FALSE	FALSE	0
cg07175945	5	32444062	ZFR	0.84386	0	0.64386	0.00366614	FALSE	FALSE	0
cg07178458	16	87867871	SLC7A5	0.836842	0	0.775439	0.000143992	FALSE	FALSE	0
cg07180603	1	183440584	SMG7;SMG7;SMG7	0.880702	0	0.782456	0.000110543	FALSE	FALSE	0
cg07182955	4	165922783		0.849123	0	0.822807	1.006e-05	FALSE	FALSE	0
cg07183060	2	32288561	SPAST;SPAST	0.885965	0	0.629825	0.00470573	FALSE	FALSE	0
cg07186707	19	39616465	PAK4;PAK4;PAK4;PAK4;PAK4;PAK4;PAK4;PAK4;PAK4;PAK4	0.908772	0	0.552632	0.0156147	FALSE	FALSE	0
cg07187289	X	153059903	IDH3G;SSR4;IDH3G;IDH3G;IDH3G	0.87193	0	0.736842	0.000477298	TRUE	FALSE	0
cg07188591	1	148854315		0.861404	0	0.707018	0.00100637	FALSE	FALSE	0
cg07195907	X	71185985	NHSL2	0.84386	0	0.796491	6.04628e-05	FALSE	FALSE	0
cg07198345	X	65382828	HEPH;HEPH;HEPH	0.850877	0	0.685965	0.00160499	FALSE	FALSE	0
cg07199801	6	31165633	HCG27	0.85614	0	0.603509	0.00730263	FALSE	FALSE	0
cg07210229	16	88609890		0.889474	0	0.863158	0	TRUE	FALSE	0
cg07212761	1	3199650	PRDM16;PRDM16	0.875439	0	0.564912	0.0131243	FALSE	FALSE	0
cg07222421	1	155718648	MSTO2P	0.910526	0	0.45614	0.0512663	FALSE	FALSE	0
cg07223206	13	100583872		0.836842	0	0.747368	0.000355578	TRUE	FALSE	0
cg07223935	17	85413	RPH3AL	0.910526	0	0.859649	0	FALSE	FALSE	0
cg07226470	6	16266437	GMPR	0.868421	0	0.747368	0.000355578	FALSE	FALSE	0
cg07235453	8	120844952	TAF2;TAF2	0.898246	0	0.719298	0.000750442	FALSE	FALSE	0
cg07240846	10	12438782	CAMK1D;CAMK1D	0.845614	0	0.859649	0	TRUE	FALSE	0
cg07264792	22	38054590	PDXP	0.849123	0	0.861404	0	FALSE	FALSE	0
cg07279178	16	22217694	EEF2K;EEF2K	0.836842	0	0.761404	0.000232117	FALSE	TRUE	0
cg07284314	12	51581006	POU6F1;POU6F1	0.870175	0	0.64386	0.00366614	FALSE	FALSE	0
cg07291802	16	4748507	ANKS3	0.870175	0	0.747368	0.000355578	FALSE	FALSE	0
cg07299762	X	129201289	ELF4;ELF4	0.894737	0	0.663158	0.0025501	FALSE	FALSE	0
cg07301957	X	129040087	UTP14A;UTP14A	0.882456	0	0.745614	0.000373971	TRUE	FALSE	0
cg07303247	13	101192361		0.889474	0	0.782456	0.000110543	FALSE	FALSE	0
cg07305886	1	45805826	MUTYH;MUTYH;MUTYH;MUTYH;MUTYH;TOE1;TOE1;MUTYH;MUTYH;MUTYH;MUTYH;MUTYH;MUTYH	0.864912	0	0.65614	0.00291815	FALSE	FALSE	0
cg07307460	22	21899163		0.894737	0	0.877193	0	FALSE	FALSE	0
cg07309144	17	45639322	NPEPPS	0.903509	0	0.8	5.08914e-05	FALSE	FALSE	0
cg07325964	X	68776664		0.835088	0	0.724561	0.000658097	FALSE	FALSE	0
cg07335343	5	78829309		0.866667	0	0.680702	0.00179245	TRUE	FALSE	0
cg07335397	17	40265767	KAT2A;DHX58	0.870175	0	0.580702	0.0104055	FALSE	FALSE	0
cg07335806	15	99791569	LRRC28	0.875439	0	0.740351	0.000433605	FALSE	FALSE	0
cg07342016	X	129306129	RAB33A	0.840351	0	0.822807	1.006e-05	TRUE	FALSE	0
cg07345257	X	109308305	TMEM164;TMEM164	0.847368	0	0.689474	0.0014891	FALSE	FALSE	0
cg07346851	1	160370286	VANGL2	0.857895	0	0.696491	0.0012776	FALSE	FALSE	0
cg07348708	6	30585533	MRPS18B;MRPS18B;PPP1R10	0.850877	0	0.492982	0.0336806	FALSE	FALSE	0
cg07348922	6	33244990	B3GALT4;B3GALT4	0.850877	0	0.64386	0.00366614	FALSE	FALSE	0
cg07366871	7	95313466		0.891228	0	0.678947	0.00185874	FALSE	FALSE	0
cg07369113	12	10366005	GABARAPL1	0.836842	0	0.650877	0.00322172	FALSE	FALSE	0
cg07370636	X	133732739	PLAC1	0.836842	0	0.677193	0.00192701	FALSE	FALSE	0
cg07376089	16	56966034	HERPUD1;HERPUD1;HERPUD1;HERPUD1;HERPUD1;HERPUD1	0.896491	0	0.659649	0.00272906	FALSE	FALSE	0
cg07377151	2	27851474	GPN1;GPN1;CCDC121;CCDC121;GPN1;GPN1;GPN1	0.847368	0	0.778947	0.000126481	FALSE	FALSE	0
cg07380496	5	71403420	MAP1B	0.850877	0	0.219298	0.365418	FALSE	FALSE	0
cg07381872	1	61408076		0.850877	0	0.75614	0.000273778	FALSE	FALSE	0
cg07384655	6	143421772	AIG1;AIG1;AIG1;AIG1	0.898246	0	0.684211	0.00166562	FALSE	FALSE	0
cg07388254	16	78910067	WWOX;WWOX	0.840351	0	0.433333	0.065282	FALSE	FALSE	0
cg07389699	6	32728786	HLA-DQB2	0.850877	0	0.736842	0.000477298	FALSE	FALSE	0
cg07393670	X	129299802	AIFM1;AIFM1;AIFM1;AIFM1;AIFM1;AIFM1;AIFM1;AIFM1	0.849123	0	0.847368	0	TRUE	FALSE	0
cg07410872	4	174451455	HAND2;NBLA00301	0.835088	0	0.5	0.0309524	FALSE	FALSE	0
cg07413356	5	134074184	CAMLG	0.857895	0	0.594737	0.00839121	FALSE	FALSE	0
cg07413956	X	55101460	PAGE2B	0.878947	0	0.82807	4.73137e-06	FALSE	FALSE	0
cg07414487	6	31107186	PSORS1C1;PSORS1C2	0.873684	0	0.577193	0.010966	TRUE	FALSE	0
cg07416344	13	114872599	RASA3	0.896491	0	0.459649	0.0493356	FALSE	TRUE	0
cg07424977	13	100153603	TM9SF2	0.836842	0	0.507018	0.0284023	FALSE	FALSE	0
cg07431748	10	99094531	FRAT2	0.84386	0	0.740351	0.000433605	FALSE	FALSE	0
cg07436655	2	65107065		0.884211	0	0.861404	0	FALSE	FALSE	0
cg07437923	16	4506231	DNAJA3;DNAJA3	0.907018	0	0.731579	0.000549219	TRUE	FALSE	0
cg07440637	20	23342882		0.859649	0	0.636842	0.00415945	FALSE	FALSE	0
cg07448771	11	67980776	SUV420H1;SUV420H1;SUV420H1;SUV420H1	0.850877	0	0.680702	0.00179245	FALSE	FALSE	0
cg07456585	14	74704714	VSX2	0.85614	0	0.724561	0.000658097	TRUE	FALSE	0
cg07462328	16	18573511	NOMO2;NOMO2	0.835088	0	0.57193	0.0118526	FALSE	FALSE	0
cg07463743	X	39863342		0.857895	0	0.859649	0	FALSE	FALSE	0
cg07464489	X	119208249	RHOXF2;RHOXF2B	0.842105	0	0.752632	0.000304546	FALSE	TRUE	0
cg07464524	X	106960206	TSC22D3;TSC22D3;TSC22D3;TSC22D3	0.859649	0	0.701754	0.00113548	FALSE	FALSE	0
cg07466166	X	77395088	TAF9B	0.901754	0	0.757895	0.000259311	FALSE	FALSE	0
cg07478795	3	23782847		0.885965	0	0.707018	0.00100637	FALSE	FALSE	0
cg07480829	X	119694550	CUL4B;CUL4B;CUL4B	0.847368	0	0.815789	1.92403e-05	TRUE	FALSE	0
cg07480955	6	31038593		0.836842	0	0.577193	0.010966	FALSE	FALSE	0
cg07482223	6	30899233	SFTA2	0.84386	0	0.917544	7.99524e-07	TRUE	FALSE	0
cg07484678	1	227103412		0.892982	0	0.770175	0.000173456	TRUE	FALSE	0
cg07485685	6	35696061	FKBP5;LOC285847	0.838596	0	0.592982	0.00862403	FALSE	FALSE	0
cg07488092	16	85309889		0.892982	0	0.8	5.08914e-05	TRUE	FALSE	0
cg07489123	19	1812466	ATP8B3	0.854386	0	0.691228	0.00143375	FALSE	FALSE	0
cg07494987	X	15664840	TMEM27	0.84386	0	0.668421	0.00229968	FALSE	FALSE	0
cg07500406	X	6145355	NLGN4X;NLGN4X;NLGN4X;NLGN4X	0.850877	0	0.652632	0.0031178	FALSE	FALSE	0
cg07507776	X	57618914	ZXDB	0.884211	0	0.736842	0.000477298	TRUE	FALSE	0
cg07508090	X	64196343	ZC4H2	0.836842	0	0.754386	0.00028885	TRUE	FALSE	0
cg07508394	2	11919475	LPIN1	0.854386	0	0.559649	0.0141488	FALSE	FALSE	0
cg07511789	X	53122617	KANTR	0.875439	0	0.778947	0.000126481	FALSE	FALSE	0
cg07532288	17	80387416	HEXDC	0.847368	0	0.778947	0.000126481	FALSE	FALSE	0
cg07534440	11	57226014		0.849123	0	0.563158	0.0134589	FALSE	FALSE	0
cg07537133	20	59965634	CDH4	0.861404	0	0.601754	0.00751056	FALSE	FALSE	0
cg07553085	X	152553217		0.849123	0	0.708772	0.000966054	FALSE	FALSE	0
cg07553115	X	107976167	IRS4	0.836842	0	0.773684	0.000153372	TRUE	FALSE	0
cg07554231	19	50083850	PRRG2;NOSIP	0.878947	0	0.698246	0.00122872	FALSE	TRUE	0
cg07555204	1	214655904	PTPN14	0.9	0	0.715789	0.000817526	FALSE	FALSE	0
cg07564399	Y	2722243	RPS4Y1	0.850877	0	0.750877	0.000320886	FALSE	FALSE	0
cg07564979	6	32451079		0.896491	0	0.661404	0.00263834	TRUE	FALSE	0
cg07569336	16	77766842	NUDT7;NUDT7;NUDT7;NUDT7	0.857895	0	0.812281	2.48466e-05	TRUE	FALSE	0
cg07573391	10	47128212	LINC00842	0.842105	0	0.594737	0.00839121	FALSE	FALSE	0
cg07576175	19	59049843		0.835088	0	0.698246	0.00122872	FALSE	FALSE	0
cg07576413	2	87934148		0.840351	0	0.729825	0.000574995	FALSE	FALSE	0
cg07582245	X	20157082	EIF1AX-AS1;EIF1AX	0.894737	0	0.8	5.08914e-05	FALSE	FALSE	0
cg07594247	2	113993304	PAX8;PAX8;PAX8;PAX8;PAX8;LOC440839;LOC654433	0.884211	0	0.764912	0.000207123	FALSE	TRUE	0
cg07597576	X	3856597		0.838596	0	0.701754	0.00113548	FALSE	FALSE	0
cg07599136	5	415885	AHRR	0.889474	0	0.710526	0.000927047	FALSE	TRUE	0
cg07606381	6	8435919	SLC35B3;SLC35B3;SLC35B3	0.9	0	0.238596	0.323791	FALSE	TRUE	0
cg07607269	13	24912749		0.840351	0	0.759649	0.00024543	FALSE	TRUE	0
cg07608505	X	101380476	TCEAL2	0.85614	0	0.763158	0.000219354	TRUE	FALSE	0
cg07609466	13	24893992	C1QTNF9;C1QTNF9;C1QTNF9	0.908772	0	0.85614	0	FALSE	FALSE	0
cg07611721	5	72784642		0.835088	0	0.35614	0.134923	FALSE	FALSE	0
cg07614064	7	107383799	CBLL1;CBLL1	0.857895	0	0.659649	0.00272906	FALSE	FALSE	0
cg07621747	1	38273765	YRDC;C1orf122;C1orf122;C1orf122;C1orf122	0.884211	0	0.605263	0.00709942	FALSE	FALSE	0
cg07622257	X	24072414	EIF2S3	0.875439	0	0.707018	0.00100637	FALSE	FALSE	0
cg07624650	19	37064219	ZNF529;ZNF529;ZNF529	0.891228	0	0.752632	0.000304546	FALSE	TRUE	0
cg07625120	6	139266399	REPS1;REPS1;REPS1;REPS1	0.835088	0	0.663158	0.0025501	FALSE	FALSE	0
cg07625129	17	74380829	SPHK1;SPHK1;SPHK1;SPHK1;SPHK1;SPHK1;SPHK1	0.878947	0	0.508772	0.0277917	FALSE	FALSE	0
cg07626446	6	111168886	AMD1	0.863158	0	0.531579	0.0207625	FALSE	FALSE	0
cg07628044	2	70520858	SNRPG;SNRPG	0.852632	0	0.570175	0.0121607	FALSE	FALSE	0
cg07629209	X	152599446	ZNF275	0.836842	0	0.722807	0.000687814	FALSE	FALSE	0
cg07629996	X	17673876	NHS;NHS	0.835088	0	0.740351	0.000433605	TRUE	FALSE	0
cg07630649	16	75600717	GABARAPL2	0.87193	0	0.610526	0.00651729	FALSE	FALSE	0
cg07635754	20	56964330	VAPB;VAPB;VAPB;VAPB;VAPB	0.861404	0	0.601754	0.00751056	FALSE	FALSE	0
cg07640233	13	75149974		0.84386	0	0.535088	0.0198211	FALSE	FALSE	0
cg07640670	1	110156211	GNAT2	0.866667	0	0.74386	0.000393093	TRUE	FALSE	0
cg07646083	2	65640057	SPRED2	0.854386	0	0.882456	0	TRUE	FALSE	0
cg07648498	16	89883185	FANCA;FANCA	0.840351	0	0.707018	0.00100637	FALSE	FALSE	0
cg07653699	X	138286295	FGF13;FGF13;FGF13	0.864912	0	0.768421	0.000184191	FALSE	FALSE	0
cg07653728	X	152939309	PNCK;PNCK	0.861404	0	0.84386	0	FALSE	FALSE	0
cg07653885	17	131827	RPH3AL;RPH3AL;RPH3AL;RPH3AL	0.836842	0	0.545614	0.0172008	TRUE	FALSE	0
cg07659053	6	171033352		0.887719	0	0.645614	0.00355061	FALSE	TRUE	0
cg07659240	X	149531594		0.849123	0	0.854386	0	FALSE	FALSE	0
cg07661093	14	89735939	FOXN3;FOXN3	0.850877	0	0.603509	0.00730263	FALSE	FALSE	0
cg07670335	X	67950419		0.864912	0	0.594737	0.00839121	FALSE	FALSE	0
cg07671620	17	1627765	WDR81;WDR81;WDR81;WDR81	0.903509	0	0.675439	0.00199731	FALSE	FALSE	0
cg07674503	X	131352282	RAP2C	0.849123	0	0.750877	0.000320886	TRUE	FALSE	0
cg07686944	X	17755642	SCML1;SCML1;SCML1;SCML1;SCML1;SCML1;SCML1;SCML1	0.889474	0	0.791228	7.68918e-05	FALSE	FALSE	0
cg07688274	1	228777936		0.850877	0	0.808772	3.12119e-05	FALSE	FALSE	0
cg07688412	9	130830096	NAIF1;SLC25A25	0.835088	0	0.703509	0.00109104	FALSE	FALSE	0
cg07693301	X	150067249	CD99L2;CD99L2;CD99L2	0.835088	0	0.729825	0.000574995	FALSE	FALSE	0
cg07693858	22	30413940	MTMR3;MTMR3;MTMR3;HORMAD2-AS1	0.912281	0	0.907018	0	FALSE	FALSE	0
cg07721069	X	11683932	ARHGAP6;ARHGAP6;ARHGAP6	0.847368	0	0.842105	0	FALSE	FALSE	0
cg07722478	7	131339567		0.868421	0	0.840351	0	FALSE	FALSE	0
cg07730622	14	76873677	ESRRB	0.850877	0	0.782456	0.000110543	TRUE	FALSE	0
cg07738938	7	5372608	TNRC18	0.84386	0	0.594737	0.00839121	FALSE	FALSE	0
cg07739966	3	183171199	LINC00888;LINC00888	0.836842	0	0.478947	0.0397056	FALSE	FALSE	0
cg07740877	20	61493324	TCFL5	0.845614	0	0.685965	0.00160499	FALSE	FALSE	0
cg07742381	11	71324525		0.838596	0	0.640351	0.00390643	FALSE	FALSE	0
cg07749147	X	153625894	RPL10;RPL10	0.842105	0	0.775439	0.000143992	FALSE	FALSE	0
cg07750402	X	48814932	OTUD5;OTUD5;OTUD5;OTUD5	0.87193	0	0.791228	7.68918e-05	TRUE	FALSE	0
cg07754407	19	1026649	CNN2;CNN2;CNN2;CNN2	0.852632	0	0.72807	0.000601715	FALSE	FALSE	0
cg07756783	7	105925539	NAMPT;NAMPT	0.847368	0	0.522807	0.0232737	FALSE	FALSE	0
cg07758404	5	138928980		0.838596	0	0.594737	0.00839121	FALSE	FALSE	0
cg07768177	X	138286760	FGF13;FGF13;FGF13	0.854386	0	0.817544	1.67023e-05	TRUE	FALSE	0
cg07772467	X	30671633	GK;GK;GK;GK;GK;GK	0.835088	0	0.824561	8.14662e-06	FALSE	FALSE	0
cg07774293	20	62694326	TCEA2;TCEA2;TCEA2	0.891228	0	0.592982	0.00862403	FALSE	FALSE	0
cg07780118	X	66766506	AR	0.857895	0	0.703509	0.00109104	FALSE	FALSE	0
cg07780777	8	59323842	UBXN2B;UBXN2B	0.836842	0	0.414035	0.0792844	FALSE	FALSE	0
cg07780887	X	73325165	NCRNA00182	0.861404	0	0.775439	0.000143992	FALSE	FALSE	0
cg07791427	12	54402704	HOXC8	0.9	0	0.696491	0.0012776	FALSE	FALSE	0
cg07796014	X	11129290	HCCS;HCCS	0.845614	0	0.7	0.00118136	FALSE	FALSE	0
cg07806343	X	129194523		0.863158	0	0.798246	5.5546e-05	TRUE	FALSE	0
cg07806607	2	209044462	C2orf80	0.870175	0	0.801754	4.64892e-05	FALSE	FALSE	0
[truncated: 51,483 more rows]

## Sheet: BRvsSA_BH
Supplementary Table S4. Characteristics of the CpGs that surpassed the Benjamini-Hochberg level of significance for the degree of correlation between brain and peripheral tissues.
	chr	MAPINFO	Gene_Name	rho_brain_saliva	p_rho_brain_saliva	rho_brain_saliva_adj	p_rho_brain_saliva_adj	SNP_flag	mQTL_flag	BH
cg00004073	2	237027592	AGAP1;AGAP1	0.903509	0	0.782456	0.000110543	TRUE	FALSE	0
cg00005617	X	68059898	EFNB1	0.863158	0	0.777193	0.000135032	FALSE	FALSE	0
cg00007215	17	21416281		0.854386	0	0.840351	0	FALSE	FALSE	0
cg00009523	2	1165351	SNTG2	0.873684	0	0.824561	8.14662e-06	TRUE	FALSE	0
cg00011200	X	48380234	EBP;EBP	0.870175	0	0.754386	0.00028885	TRUE	FALSE	0
cg00011247	8	64081001	YTHDF3	0.868421	0	0.573684	0.0115508	FALSE	FALSE	0
cg00016625	16	33935639		0.903509	0	0.719298	0.000750442	FALSE	FALSE	0
cg00017110	X	150123346		0.901754	0	0.85614	0	FALSE	FALSE	0
cg00018261	X	117957689	ZCCHC12	0.850877	0	0.724561	0.000658097	TRUE	FALSE	0
cg00031235	X	49124819	PPP1R3F	0.885965	0	0.878947	0	FALSE	FALSE	0
cg00031303	3	195681400		0.885965	0	0.845614	0	FALSE	TRUE	0
cg00033209	16	3511787	NAT15;NAT15;NAT15	0.875439	0	0.815789	1.92403e-05	FALSE	FALSE	0
cg00035237	1	31538879	PUM1;PUM1	0.850877	0	0.778947	0.000126481	FALSE	FALSE	0
cg00045070	1	55504649	PCSK9	0.842105	0	0.757895	0.000259311	TRUE	FALSE	0
cg00046099	X	54556443	GNL3L	0.845614	0	0.868421	0	TRUE	FALSE	0
cg00054209	9	33524089	ANKRD18B	0.859649	0	0.759649	0.00024543	FALSE	FALSE	0
cg00055434	1	2415344	PLCH2	0.878947	0	0.880702	0	FALSE	FALSE	0
cg00059870	21	44702611		0.866667	0	0.661404	0.00263834	FALSE	FALSE	0
cg00070241	1	2631547	TTC34	0.836842	0	0.785965	9.60713e-05	FALSE	FALSE	0
cg00072288	X	153200492	NAA10	0.864912	0	0.742105	0.000412963	FALSE	FALSE	0
cg00079477	12	57780204		0.84386	0	0.754386	0.00028885	FALSE	TRUE	0
cg00087182	22	24302043	GSTT2B;GSTT2	0.852632	0	0.738596	0.000455042	FALSE	TRUE	0
cg00090782	10	43248870		0.863158	0	0.891228	0	FALSE	FALSE	0
cg00091810	X	153632032	DNASE1L1;DNASE1L1;DNASE1L1;DNASE1L1;DNASE1L1	0.873684	0	0.782456	0.000110543	FALSE	FALSE	0
cg00094739	17	77179999	HRNBP3	0.835088	0	0.784211	0.00010313	FALSE	FALSE	0
cg00096071	X	77396435	TAF9B	0.845614	0	0.903509	0	FALSE	FALSE	0
cg00099616	X	100646545	RPL36A;RPL36A;RPL36A-HNRNPH2;RPL36A-HNRNPH2;RPL36A;BTK;RPL36A;RPL36A-HNRNPH2;RPL36A-HNRNPH2	0.849123	0	0.701754	0.00113548	FALSE	FALSE	0
cg00102266	1	121429834		0.903509	0	0.908772	0	FALSE	TRUE	0
cg00112465	3	128719999	CCDC48	0.836842	0	0.782456	0.000110543	FALSE	FALSE	0
cg00114625	X	24483478	PDK3;PDK3;PDK3;PDK3	0.870175	0	0.729825	0.000574995	TRUE	FALSE	0
cg00124993	5	135416412	MIR886	0.885965	0	0.829825	3.21707e-06	TRUE	FALSE	0
cg00125893	15	71747687	THSD4	0.894737	0	0.826316	6.37252e-06	TRUE	FALSE	0
cg00128197	X	53461455	HSD17B10;HSD17B10	0.892982	0	0.82807	4.73137e-06	FALSE	FALSE	0
cg00130223	16	33070551		0.836842	0	0.738596	0.000455042	FALSE	FALSE	0
cg00130498	X	129192712		0.842105	0	0.780702	0.000118322	FALSE	FALSE	0
cg00130820	X	129535871	RBMX2	0.85614	0	0.784211	0.00010313	FALSE	FALSE	0
cg00137195	9	67031868	LOC286297	0.854386	0	0.850877	0	TRUE	FALSE	0
cg00144942	2	241119882		0.864912	0	0.908772	0	TRUE	FALSE	0
cg00146240	15	62899159		0.880702	0	0.870175	0	TRUE	FALSE	0
cg00146996	5	25120424		0.849123	0	0.861404	0	FALSE	FALSE	0
cg00149117	X	71769393	HDAC8;HDAC8;HDAC8;HDAC8;HDAC8	0.892982	0	0.645614	0.00355061	TRUE	FALSE	0
cg00151744	15	85891516		0.850877	0	0.833333	5.45502e-07	TRUE	FALSE	0
cg00152978	13	52733628	NEK3;NEK3;NEK3;NEK3	0.898246	0	0.861404	0	FALSE	TRUE	0
cg00162191	1	91853024	HFM1	0.842105	0	0.761404	0.000232117	FALSE	FALSE	0
cg00164589	X	117481189	WDR44;WDR44;WDR44	0.838596	0	0.742105	0.000412963	FALSE	FALSE	0
cg00167275	10	88854588	FAM35A;GLUD1;GLUD1	0.887719	0	0.778947	0.000126481	FALSE	FALSE	0
cg00167628	17	55687345	MSI2;MSI2	0.898246	0	0.789474	8.29641e-05	TRUE	FALSE	0
cg00179446	X	118986947	UPF3B;UPF3B;UPF3B;UPF3B	0.880702	0	0.696491	0.0012776	TRUE	FALSE	0
cg00179598	X	38078359	SRPX;SRPX;SRPX;SRPX	0.835088	0	0.831579	1.82368e-06	FALSE	FALSE	0
cg00188257	X	34677877		0.850877	0	0.877193	0	FALSE	FALSE	0
cg00192980	X	77394971	TAF9B	0.9	0	0.735088	0.000500396	TRUE	FALSE	0
cg00193438	1	12909285	HNRNPCL4;HNRNPCL3;HNRNPCL1	0.850877	0	0.838596	0	FALSE	FALSE	0
cg00200463	X	67913573	STARD8;STARD8;STARD8;STARD8	0.836842	0	0.694737	0.00132804	TRUE	FALSE	0
cg00206553	17	26574231	PPY2	0.840351	0	0.847368	0	FALSE	FALSE	0
cg00213748	Y	8148233		0.885965	0	0.898246	0	FALSE	TRUE	0
cg00216997	X	48980153	GPKOW	0.878947	0	0.75614	0.000273778	TRUE	FALSE	0
cg00218628	12	31255279	DDX11;DDX11;DDX11	0.840351	0	0.82807	4.73137e-06	TRUE	FALSE	0
cg00220389	17	80455521		0.864912	0	0.778947	0.000126481	FALSE	FALSE	0
cg00237687	X	101601399		0.864912	0	0.863158	0	FALSE	FALSE	0
cg00240113	X	136648241	ZIC3	0.873684	0	0.707018	0.00100637	TRUE	FALSE	0
cg00243527	22	30640594	LIF	0.840351	0	0.870175	0	TRUE	FALSE	0
cg00245012	X	57148068	SPIN2B;SPIN2B;SPIN2B	0.842105	0	0.717544	0.000783412	TRUE	FALSE	0
cg00247094	17	77922972	TBC1D16	0.854386	0	0.885965	0	TRUE	FALSE	0
cg00257789	2	3451506	TTC15	0.9	0	0.905263	0	TRUE	FALSE	0
cg00260448	X	30907780	MAP3K7IP3	0.870175	0	0.857895	0	FALSE	FALSE	0
cg00262681	5	179720254	MAPK9;MAPK9;MAPK9;MAPK9;MAPK9	0.868421	0	0.810526	2.79303e-05	FALSE	FALSE	0
cg00271873	Y	14649908		0.840351	0	0.815789	1.92403e-05	FALSE	TRUE	0
cg00279662	5	54989614	SLC38A9;SLC38A9;SLC38A9;SLC38A9;SLC38A9	0.866667	0	0.682456	0.00172809	FALSE	FALSE	0
cg00288584	8	92053063	TMEM55A;TMEM55A	0.880702	0	0.749123	0.000337889	FALSE	FALSE	0
cg00293269	13	113422115	ATP11A;ATP11A	0.854386	0	0.901754	0	TRUE	FALSE	0
cg00294814	10	94734881	EXOC6;EXOC6	0.857895	0	0.501754	0.0302985	FALSE	FALSE	0
cg00311963	Y	9747781	LOC100101121;TTTY23	0.836842	0	0.75614	0.000273778	FALSE	FALSE	0
cg00314178	10	52115682	SGMS1	0.84386	0	0.752632	0.000304546	FALSE	FALSE	0
cg00318166	4	190230730		0.878947	0	0.721053	0.000718586	TRUE	FALSE	0
cg00325458	2	61108567	REL	0.854386	0	0.868421	0	FALSE	FALSE	0
cg00328582	X	102000756	BHLHB9;BHLHB9;BHLHB9;BHLHB9;BHLHB9;BHLHB9;BHLHB9;BHLHB9	0.870175	0	0.726316	0.000629407	FALSE	FALSE	0
cg00333335	2	77315382	LRRTM4;LRRTM4	0.857895	0	0.650877	0.00322172	FALSE	FALSE	0
cg00337921	X	129091288		0.850877	0	0.703509	0.00109104	TRUE	FALSE	0
cg00347850	X	46696907	RP2	0.850877	0	0.736842	0.000477298	TRUE	FALSE	0
cg00354179	1	180881480	KIAA1614	0.868421	0	0.242105	0.316546	FALSE	FALSE	0
cg00357543	15	93974410		0.877193	0	0.845614	0	FALSE	FALSE	0
cg00375105	X	153625785	RPL10;RPL10	0.903509	0	0.689474	0.0014891	FALSE	FALSE	0
cg00377054	X	134826932		0.857895	0	0.826316	6.37252e-06	FALSE	FALSE	0
cg00379371	X	48774742	PIM2	0.884211	0	0.821053	1.21192e-05	FALSE	FALSE	0
cg00379528	12	125350693		0.891228	0	0.805263	3.84027e-05	FALSE	FALSE	0
cg00379799	X	12154656		0.891228	0	0.817544	1.67023e-05	FALSE	FALSE	0
cg00386581	11	62446121	UBXN1	0.863158	0	0.819298	1.4331e-05	FALSE	FALSE	0
cg00387037	7	73999048	GTF2IRD1;GTF2IRD1;GTF2IRD1	0.84386	0	0.589474	0.00910547	FALSE	FALSE	0
cg00391044	X	136510091		0.892982	0	0.742105	0.000412963	FALSE	FALSE	0
cg00399450	X	73834086	RLIM;RLIM	0.901754	0	0.766667	0.000195408	TRUE	FALSE	0
cg00399861	4	146879597		0.84386	0	0.807018	3.46999e-05	FALSE	FALSE	0
cg00408231	X	100807848	ARMCX1	0.857895	0	0.757895	0.000259311	FALSE	FALSE	0
cg00409480	X	38115655		0.887719	0	0.875439	0	FALSE	FALSE	0
cg00413030	7	158947138		0.845614	0	0.901754	0	FALSE	FALSE	0
cg00419711	10	1205595	NCRNA00200	0.838596	0	0.503509	0.0296556	FALSE	FALSE	0
cg00421139	8	97172961	GDF6;GDF6	0.850877	0	0.817544	1.67023e-05	FALSE	FALSE	0
cg00426182	6	28072559		0.850877	0	0.582456	0.0101341	FALSE	FALSE	0
cg00428012	X	77166217	ATP7A;ATP7A	0.857895	0	0.747368	0.000355578	TRUE	FALSE	0
cg00436317	X	142722473	SLITRK4;SLITRK4;SLITRK4	0.898246	0	0.780702	0.000118322	FALSE	FALSE	0
cg00438499	X	20008525	LOC729609	0.864912	0	0.768421	0.000184191	TRUE	FALSE	0
cg00443543	17	1645410	SERPINF2;SERPINF2;SERPINF2	0.84386	0	0.857895	0	TRUE	FALSE	0
cg00448235	16	15042321	NPIP	0.864912	0	0.722807	0.000687814	FALSE	FALSE	0
cg00455876	Y	9385539		0.850877	0	0.750877	0.000320886	FALSE	FALSE	0
cg00458505	X	17393449	NHS	0.877193	0	0.661404	0.00263834	TRUE	FALSE	0
cg00463901	6	163752570		0.835088	0	0.796491	6.04628e-05	TRUE	FALSE	0
cg00466309	X	148622572	LOC100131434;CXorf40A;CXorf40A	0.910526	0	0.821053	1.21192e-05	TRUE	FALSE	0
cg00467151	17	139045	RPH3AL;RPH3AL;RPH3AL;RPH3AL	0.907018	0	0.84386	0	TRUE	FALSE	0
cg00473354	X	48334413	FTSJ1;FTSJ1	0.863158	0	0.733333	0.000524361	FALSE	FALSE	0
cg00474373	2	1625268		0.870175	0	0.864912	0	TRUE	FALSE	0
cg00476580	1	150207583	ANP32E;ANP32E;ANP32E	0.845614	0	0.770175	0.000173456	FALSE	FALSE	0
cg00479770	11	111289721	LOC100132078	0.847368	0	0.575439	0.0112553	FALSE	FALSE	0
cg00488012	2	227710	SH3YL1;SH3YL1;SH3YL1;SH3YL1;SH3YL1;SH3YL1;SH3YL1;SH3YL1	0.863158	0	0.394737	0.0954438	FALSE	FALSE	0
cg00489541	21	35961334	RCAN1;RCAN1;RCAN1	0.901754	0	0.715789	0.000817526	FALSE	FALSE	0
cg00507354	4	76598817	G3BP2;G3BP2;G3BP2	0.868421	0	0.566667	0.0127964	FALSE	FALSE	0
cg00516513	4	41753803		0.850877	0	0.735088	0.000500396	FALSE	FALSE	0
cg00517535	4	185779616		0.840351	0	0.724561	0.000658097	FALSE	FALSE	0
cg00529027	X	151806225	GABRQ	0.859649	0	0.824561	8.14662e-06	FALSE	FALSE	0
cg00531806	4	190938709		0.852632	0	0.863158	0	FALSE	FALSE	0
cg00547789	X	154493750	RAB39B;RAB39B	0.847368	0	0.807018	3.46999e-05	FALSE	FALSE	0
cg00554969	X	79278012	TBX22;TBX22;TBX22	0.836842	0	0.812281	2.48466e-05	FALSE	FALSE	0
cg00569953	11	66036020	RAB1B	0.857895	0	0.863158	0	FALSE	FALSE	0
cg00573203	X	53106360	GPR173	0.836842	0	0.892982	0	FALSE	FALSE	0
cg00573550	7	149701920		0.894737	0	0.892982	0	FALSE	FALSE	0
cg00583618	X	49020114	MAGIX;MAGIX;MAGIX;MAGIX	0.905263	0	0.714035	0.000852816	TRUE	FALSE	0
cg00597858	X	51636568	MAGED1;MAGED1;MAGED1	0.850877	0	0.877193	0	FALSE	FALSE	0
cg00611101	X	101380608	TCEAL2	0.85614	0	0.805263	3.84027e-05	FALSE	FALSE	0
cg00616572	16	10772249	TEKT5	0.908772	0	0.894737	0	TRUE	FALSE	0
cg00622384	X	118925635	RPL39	0.875439	0	0.750877	0.000320886	FALSE	FALSE	0
cg00622389	X	100914950	ARMCX2;ARMCX2	0.910526	0	0.838596	0	FALSE	FALSE	0
cg00631877	12	94640673	PLXNC1	0.873684	0	0.836842	0	TRUE	FALSE	0
cg00651446	X	101380386	TCEAL2	0.892982	0	0.738596	0.000455042	TRUE	FALSE	0
cg00662775	X	102840435	TCEAL4;TCEAL4;TCEAL4;TCEAL4;TCEAL4;TCEAL4;TCEAL4;TCEAL4;TCEAL4;TCEAL4;TCEAL4;TCEAL4;TCEAL4	0.866667	0	0.859649	0	FALSE	FALSE	0
cg00679794	3	186522625	RFC4;RFC4	0.908772	0	0.821053	1.21192e-05	FALSE	FALSE	0
cg00689116	X	9983823	WWC3;WWC3	0.866667	0	0.777193	0.000135032	FALSE	FALSE	0
cg00690692	X	134305330	CT55;CT55;CT55;CT55	0.840351	0	0.763158	0.000219354	FALSE	FALSE	0
cg00691480	X	148713506	TMEM185A;TMEM185A;TMEM185A;TMEM185A;TMEM185A;TMEM185A;TMEM185A	0.882456	0	0.742105	0.000412963	TRUE	FALSE	0
cg00692892	X	150861833		0.852632	0	0.863158	0	FALSE	FALSE	0
cg00706755	X	63445884	ASB12	0.907018	0	0.903509	0	TRUE	FALSE	0
cg00708437	X	44202837	EFHC2;EFHC2	0.842105	0	0.801754	4.64892e-05	FALSE	FALSE	0
cg00711773	3	40351057	EIF1B	0.859649	0	0.694737	0.00132804	FALSE	FALSE	0
cg00713204	16	88016632	BANP;BANP	0.892982	0	0.863158	0	TRUE	FALSE	0
cg00715011	X	80457681	HMGN5;SH3BGRL;SH3BGRL	0.838596	0	0.750877	0.000320886	FALSE	FALSE	0
cg00723688	X	12817037	PRPS2;PRPS2	0.845614	0	0.854386	0	FALSE	FALSE	0
cg00729461	X	133371084	CCDC160;CCDC160	0.87193	0	0.733333	0.000524361	TRUE	FALSE	0
cg00730761	6	101113084	ASCC3	0.84386	0	0.784211	0.00010313	TRUE	FALSE	0
cg00735237	10	44398590		0.864912	0	0.764912	0.000207123	TRUE	FALSE	0
cg00738702	X	48684296		0.889474	0	0.901754	0	FALSE	FALSE	0
cg00738849	4	190906046	TUBB4Q	0.912281	0	0.919298	1.15358e-06	FALSE	TRUE	0
cg00743068	X	77041832	ATRX;ATRX	0.850877	0	0.794737	6.56523e-05	FALSE	FALSE	0
cg00753039	10	134969141		0.877193	0	0.817544	1.67023e-05	FALSE	TRUE	0
cg00762184	Y	14774526	TTTY15	0.901754	0	0.708772	0.000966054	FALSE	TRUE	0
cg00763315	X	73439472	NCRNA00182;MIR374B;MIR421	0.852632	0	0.833333	5.45502e-07	FALSE	FALSE	0
cg00768999	2	133038669		0.882456	0	0.778947	0.000126481	FALSE	FALSE	0
cg00769799	X	133594079	HPRT1	0.863158	0	0.719298	0.000750442	TRUE	FALSE	0
cg00779763	X	47479114	SYN1;SYN1	0.840351	0	0.810526	2.79303e-05	TRUE	FALSE	0
cg00781978	X	40506067	CXorf38	0.901754	0	0.877193	0	FALSE	FALSE	0
cg00787015	X	40506177	CXorf38	0.892982	0	0.845614	0	FALSE	FALSE	0
cg00790086	X	46696474	RP2;RP2	0.852632	0	0.780702	0.000118322	TRUE	FALSE	0
cg00811210	2	40064822		0.910526	0	0.719298	0.000750442	TRUE	FALSE	0
cg00813142	X	23685984	PRDX4	0.854386	0	0.673684	0.00206967	TRUE	FALSE	0
cg00813486	4	8173854		0.868421	0	0.610526	0.00651729	FALSE	FALSE	0
cg00827853	16	88722479	MVD	0.878947	0	0.703509	0.00109104	FALSE	FALSE	0
cg00832270	X	77359535	PGK1	0.868421	0	0.761404	0.000232117	TRUE	FALSE	0
cg00835812	18	48681350		0.859649	0	0.87193	0	FALSE	FALSE	0
cg00836161	18	48554285		0.901754	0	0.808772	3.12119e-05	TRUE	FALSE	0
cg00845806	X	154445068	VBP1	0.866667	0	0.773684	0.000153372	TRUE	FALSE	0
cg00873648	6	26758622		0.9	0	0.889474	0	TRUE	TRUE	0
cg00875852	14	74001118	HEATR4	0.889474	0	0.829825	3.21707e-06	TRUE	TRUE	0
cg00878188	2	106895165		0.87193	0	0.896491	0	FALSE	FALSE	0
cg00888402	17	33772796	SLFN13	0.835088	0	0.761404	0.000232117	TRUE	FALSE	0
cg00895705	X	54384537	WNK3;WNK3	0.84386	0	0.782456	0.000110543	FALSE	FALSE	0
cg00898157	9	115851944		0.892982	0	0.861404	0	FALSE	TRUE	0
cg00902417	17	15492168	CDRT1	0.835088	0	0.766667	0.000195408	FALSE	TRUE	0
cg00910107	17	81032839		0.85614	0	0.894737	0	TRUE	FALSE	0
cg00911055	X	54069423	PHF8;PHF8;PHF8;PHF8	0.878947	0	0.861404	0	FALSE	FALSE	0
cg00927228	X	114953712		0.870175	0	0.857895	0	TRUE	FALSE	0
cg00936342	X	100306566	TRMT2B;TRMT2B;TRMT2B;TRMT2B	0.907018	0	0.780702	0.000118322	TRUE	FALSE	0
cg00940232	X	135962391	RBMX;RBMX;RBMX;RBMX;SNORD61	0.889474	0	0.842105	0	TRUE	FALSE	0
cg00953793	X	20283580	RPS6KA3	0.850877	0	0.863158	0	FALSE	FALSE	0
cg00954539	X	103087267	RAB9B	0.84386	0	0.84386	0	FALSE	FALSE	0
cg00967529	X	6492860		0.864912	0	0.822807	1.006e-05	FALSE	FALSE	0
cg00967989	9	108210147	FSD1L;FSD1L;FSD1L;FSD1L	0.838596	0	0.615789	0.00597476	FALSE	FALSE	0
cg00975326	X	19989847	CXorf23	0.857895	0	0.812281	2.48466e-05	FALSE	FALSE	0
cg00981643	X	153363708	MECP2;MECP2	0.870175	0	0.852632	0	FALSE	FALSE	0
cg00988678	X	119005603	RNF113A;NDUFA1;RNF113A	0.880702	0	0.754386	0.00028885	TRUE	FALSE	0
cg00993799	7	104653126	LOC100216545	0.847368	0	0.550877	0.0159996	FALSE	FALSE	0
cg00997387	1	233363393	PCNXL2	0.868421	0	0.768421	0.000184191	TRUE	FALSE	0
cg01000789	X	69509790	PDZD11;PDZD11;KIF4A	0.852632	0	0.689474	0.0014891	TRUE	FALSE	0
cg01003197	X	67653925	OPHN1	0.875439	0	0.735088	0.000500396	TRUE	FALSE	0
cg01004097	16	115041	RHBDF1;RHBDF1	0.903509	0	0.878947	0	TRUE	FALSE	0
cg01004805	X	71458680	ERCC6L;PIN4	0.850877	0	0.778947	0.000126481	FALSE	FALSE	0
cg01010618	X	130423130	IGSF1;IGSF1;IGSF1;IGSF1;IGSF1	0.835088	0	0.892982	0	FALSE	FALSE	0
cg01030166	X	106966641	TSC22D3	0.880702	0	0.873684	0	FALSE	FALSE	0
cg01033360	19	3381432	NFIC;NFIC	0.861404	0	0.805263	3.84027e-05	FALSE	FALSE	0
cg01044608	19	57831834	ZNF543	0.910526	0	0.864912	0	FALSE	TRUE	0
cg01045132	19	11649571	CNN1	0.840351	0	0.542105	0.0180412	FALSE	TRUE	0
cg01052065	X	110339654	PAK3;PAK3;PAK3	0.850877	0	0.861404	0	FALSE	FALSE	0
cg01056373	X	151999547	NSDHL;NSDHL;NSDHL;NSDHL;CETN2	0.836842	0	0.863158	0	FALSE	FALSE	0
cg01062269	X	100603843	TIMM8A;TIMM8A;TIMM8A	0.870175	0	0.724561	0.000658097	FALSE	FALSE	0
cg01062318	8	52682368	PXDNL	0.838596	0	0.635088	0.00429089	FALSE	FALSE	0
cg01066472	1	75591029		0.838596	0	0.645614	0.00355061	FALSE	FALSE	0
cg01073976	X	73406663	FTX	0.891228	0	0.931579	3.44351e-06	FALSE	FALSE	0
cg01077724	1	75590483		0.835088	0	0.657895	0.00282231	FALSE	FALSE	0
cg01080862	X	117861389	IL13RA1	0.852632	0	0.698246	0.00122872	TRUE	FALSE	0
cg01083397	X	153362990	MECP2;MECP2	0.894737	0	0.652632	0.0031178	FALSE	FALSE	0
cg01084328	X	40064418		0.863158	0	0.84386	0	FALSE	FALSE	0
cg01099299	2	133016453	NCRNA00164	0.836842	0	0.563158	0.0134589	FALSE	FALSE	0
cg01100678	19	5791279	DUS3L;DUS3L	0.849123	0	0.601754	0.00751056	FALSE	FALSE	0
cg01104348	X	106765576	FRMPD3;FRMPD3-AS1	0.896491	0	0.857895	0	FALSE	FALSE	0
cg01105557	1	15931098		0.863158	0	0.8	5.08914e-05	FALSE	TRUE	0
cg01125381	X	49644706	LOC158572;USP27X;USP27X	0.880702	0	0.878947	0	FALSE	FALSE	0
cg01142317	X	101186992	ZMAT1	0.898246	0	0.719298	0.000750442	FALSE	FALSE	0
cg01150083	X	48980043	GPKOW	0.892982	0	0.757895	0.000259311	TRUE	FALSE	0
cg01154903	1	161429991		0.85614	0	0.826316	6.37252e-06	FALSE	FALSE	0
cg01156747	7	120659		0.870175	0	0.85614	0	TRUE	FALSE	0
cg01157952	16	66981800		0.852632	0	0.615789	0.00597476	FALSE	FALSE	0
cg01162053	20	4991784	SLC23A2	0.845614	0	0.722807	0.000687814	FALSE	FALSE	0
cg01169073	12	112280321	C12orf47;MAPKAPK5;MAPKAPK5;MAPKAPK5;MAPKAPK5	0.905263	0	0.622807	0.00530932	FALSE	FALSE	0
cg01176653	18	11761979	GNAL;GNAL;GNAL	0.875439	0	0.766667	0.000195408	TRUE	FALSE	0
cg01178063	X	69283055	OTUD6A	0.842105	0	0.814035	2.19525e-05	FALSE	FALSE	0
cg01181863	3	195395398	SDHAP2	0.894737	0	0.819298	1.4331e-05	FALSE	FALSE	0
cg01191832	X	57619327	ZXDB	0.885965	0	0.735088	0.000500396	FALSE	FALSE	0
cg01192859	X	68441090		0.842105	0	0.852632	0	FALSE	FALSE	0
cg01193368	7	56855195		0.835088	0	0.901754	0	FALSE	FALSE	0
cg01212677	X	24483290	PDK3;PDK3	0.891228	0	0.74386	0.000393093	TRUE	FALSE	0
cg01212903	X	139517847		0.847368	0	0.817544	1.67023e-05	FALSE	FALSE	0
cg01221053	X	39158629		0.885965	0	0.921053	1.50172e-06	FALSE	FALSE	0
cg01225004	14	101922290		0.889474	0	0.798246	5.5546e-05	TRUE	FALSE	0
cg01232495	21	37433125	SETD4;SETD4;SETD4;SETD4;SETD4	0.861404	0	0.861404	0	FALSE	FALSE	0
cg01238044	22	24384105	GSTT1	0.842105	0	0.72807	0.000601715	TRUE	TRUE	0
cg01241775	X	138287234	FGF13;FGF13;FGF13	0.892982	0	0.747368	0.000355578	FALSE	FALSE	0
cg01245531	X	138277067	FGF13;FGF13;FGF13	0.868421	0	0.722807	0.000687814	FALSE	FALSE	0
cg01248855	17	29234505	C17orf42	0.866667	0	0.845614	0	TRUE	FALSE	0
cg01258484	21	44394503	PKNOX1	0.835088	0	0.761404	0.000232117	FALSE	FALSE	0
cg01266362	9	98265802	PTCH1;PTCH1;PTCH1;PTCH1;PTCH1;PTCH1;PTCH1	0.868421	0	0.55614	0.0148671	FALSE	FALSE	0
cg01275669	7	47294004		0.854386	0	0.459649	0.0493356	FALSE	TRUE	0
cg01281078	17	37886864	C17orf37	0.840351	0	0.845614	0	FALSE	FALSE	0
cg01282008	X	130839061	FIRRE	0.85614	0	0.719298	0.000750442	TRUE	FALSE	0
cg01283806	3	129262076	H1FOO	0.838596	0	0.873684	0	TRUE	FALSE	0
cg01286388	X	77151065	MAGT1	0.866667	0	0.752632	0.000304546	FALSE	FALSE	0
cg01288367	X	68384992	PJA1;PJA1;PJA1	0.850877	0	0.840351	0	TRUE	FALSE	0
cg01289081	X	69353644	IGBP1	0.864912	0	0.831579	1.82368e-06	FALSE	FALSE	0
cg01289874	17	65072689	HELZ	0.849123	0	0.773684	0.000153372	FALSE	FALSE	0
cg01290348	X	102942188	MORF4L2;MORF4L2;MORF4L2;MORF4L2;MORF4L2;MORF4L2;MORF4L2;MORF4L2;MORF4L2-AS1;MORF4L2;MORF4L2;MORF4L2;MORF4L2;MORF4L2;MORF4L2;MORF4L2;MORF4L2	0.840351	0	0.750877	0.000320886	FALSE	FALSE	0
cg01294637	17	44636137	ARL17A;ARL17A;ARL17A;ARL17A;ARL17A	0.889474	0	0.859649	0	FALSE	FALSE	0
cg01296877	1	2274955	MORN1	0.870175	0	0.905263	0	TRUE	FALSE	0
cg01302165	20	35492437	C20orf117	0.852632	0	0.601754	0.00751056	FALSE	FALSE	0
cg01303569	X	48755020	TIMM17B;PQBP1;PQBP1;PQBP1;PQBP1;PQBP1;PQBP1;TIMM17B;PQBP1;PQBP1;PQBP1	0.878947	0	0.696491	0.0012776	TRUE	FALSE	0
cg01309118	2	177270317		0.84386	0	0.757895	0.000259311	TRUE	FALSE	0
cg01314643	X	62570863	SPIN4;SPIN4	0.845614	0	0.761404	0.000232117	TRUE	FALSE	0
cg01317270	19	10217143	PPAN-P2RY11;SNORD105;PPAN	0.854386	0	0.519298	0.0243438	FALSE	FALSE	0
cg01326018	6	57350270	PRIM2	0.885965	0	0.782456	0.000110543	FALSE	FALSE	0
cg01329836	X	66764464	AR;AR	0.891228	0	0.798246	5.5546e-05	TRUE	FALSE	0
cg01332299	2	85501998	TCF7L1	0.912281	0	0.733333	0.000524361	TRUE	FALSE	0
cg01343049	3	38388339	XYLB;XYLB	0.84386	0	0.564912	0.0131243	FALSE	FALSE	0
cg01360317	16	84377124		0.864912	0	0.692982	0.00138008	FALSE	FALSE	0
cg01364907	X	24336335		0.880702	0	0.787719	8.93533e-05	FALSE	FALSE	0
cg01370179	X	153218937	HCFC1	0.857895	0	0.796491	6.04628e-05	FALSE	FALSE	0
cg01370334	2	3504370	ADI1	0.836842	0	0.412281	0.0806616	FALSE	FALSE	0
cg01382830	12	6975192	TPI1;TPI1;USP5;USP5	0.875439	0	0.868421	0	FALSE	FALSE	0
cg01388693	3	187664092		0.854386	0	0.887719	0	TRUE	FALSE	0
cg01392941	X	129244742	ELF4;ELF4	0.847368	0	0.742105	0.000412963	FALSE	FALSE	0
cg01394167	4	9479622		0.870175	0	0.835088	0	TRUE	TRUE	0
cg01397495	2	136496804		0.863158	0	0.805263	3.84027e-05	TRUE	FALSE	0
cg01402625	X	102469990	BEX4;BEX4	0.866667	0	0.696491	0.0012776	FALSE	FALSE	0
cg01403305	19	4457764	UBXN6;UBXN6	0.85614	0	0.642105	0.00378473	FALSE	FALSE	0
cg01405303	X	152066574		0.87193	0	0.750877	0.000320886	TRUE	FALSE	0
cg01412404	3	14289162		0.873684	0	0.84386	0	TRUE	FALSE	0
cg01414268	8	2480911		0.842105	0	0.850877	0	FALSE	FALSE	0
cg01427108	3	46484379	LTF;LTF	0.863158	0	0.691228	0.00143375	TRUE	FALSE	0
cg01430241	X	153665714	GDI1	0.842105	0	0.719298	0.000750442	TRUE	FALSE	0
cg01435641	3	75707990		0.87193	0	0.749123	0.000337889	FALSE	FALSE	0
cg01439340	17	79369256		0.87193	0	0.829825	3.21707e-06	FALSE	FALSE	0
cg01447292	X	133102264	GPC3;GPC3;GPC3;GPC3	0.850877	0	0.785965	9.60713e-05	FALSE	FALSE	0
cg01449198	X	68382546	PJA1;PJA1;PJA1	0.842105	0	0.801754	4.64892e-05	FALSE	FALSE	0
cg01462040	X	147582071	AFF2;AFF2;AFF2;AFF2;AFF2	0.87193	0	0.789474	8.29641e-05	TRUE	FALSE	0
cg01462799	19	18959208	UPF1	0.866667	0	0.821053	1.21192e-05	FALSE	FALSE	0
cg01477427	X	53461421	HSD17B10;HSD17B10	0.835088	0	0.770175	0.000173456	FALSE	FALSE	0
cg01486300	11	71885949		0.840351	0	0.838596	0	TRUE	FALSE	0
cg01490918	X	122992224	XIAP	0.866667	0	0.87193	0	FALSE	FALSE	0
cg01494303	16	3508002	NAT15;NAT15;NAT15;NAT15;NAT15	0.838596	0	0.496491	0.0322937	FALSE	FALSE	0
cg01497365	X	30671488	GK;GK;GK;GK;GK;GK;GK;GK	0.852632	0	0.766667	0.000195408	FALSE	FALSE	0
cg01499172	6	39759941	DAAM2	0.852632	0	0.535088	0.0198211	FALSE	FALSE	0
cg01501311	X	153200487	NAA10;NAA10;NAA10;NAA10;NAA10;NAA10	0.836842	0	0.761404	0.000232117	FALSE	FALSE	0
cg01513967	1	8484004	RERE;RERE;RERE	0.864912	0	0.896491	0	FALSE	FALSE	0
cg01522456	1	115632236	TSPAN2	0.847368	0	0.645614	0.00355061	FALSE	FALSE	0
cg01530162	X	139589424		0.840351	0	0.807018	3.46999e-05	FALSE	FALSE	0
cg01531495	13	76123901	UCHL3	0.857895	0	0.854386	0	FALSE	FALSE	0
cg01533115	X	48911192		0.878947	0	0.721053	0.000718586	FALSE	FALSE	0
cg01540386	X	39873535		0.87193	0	0.878947	0	FALSE	FALSE	0
cg01540869	13	25116150		0.903509	0	0.77193	0.000163189	FALSE	FALSE	0
cg01543116	X	100184268	XKRX	0.845614	0	0.770175	0.000173456	FALSE	FALSE	0
cg01545419	X	30265447	MAGEB1;MAGEB1;MAGEB1	0.891228	0	0.873684	0	FALSE	FALSE	0
cg01560685	16	32322028		0.880702	0	0.72807	0.000601715	FALSE	FALSE	0
cg01563601	1	147768263		0.849123	0	0.845614	0	FALSE	FALSE	0
cg01564068	1	110198568	GSTM4;GSTM4;GSTM4	0.838596	0	0.731579	0.000549219	FALSE	FALSE	0
cg01571169	16	87367721	FBXO31;FBXO31	0.861404	0	0.77193	0.000163189	FALSE	FALSE	0
cg01574460	X	10184761	CLCN4;CLCN4	0.838596	0	0.868421	0	FALSE	FALSE	0
cg01584086	11	10373718		0.859649	0	0.796491	6.04628e-05	TRUE	FALSE	0
cg01589255	X	73756723		0.859649	0	0.747368	0.000355578	TRUE	FALSE	0
cg01590557	9	109787501	MIR548Q;LOC340512	0.892982	0	0.907018	0	FALSE	FALSE	0
cg01600123	X	69672435	DLG3;DLG3;DLG3	0.840351	0	0.801754	4.64892e-05	TRUE	FALSE	0
cg01600189	9	66553962		0.857895	0	0.875439	0	FALSE	FALSE	0
cg01624386	7	76135677		0.870175	0	0.863158	0	TRUE	FALSE	0
cg01629740	X	151144208	GABRE	0.845614	0	0.77193	0.000163189	FALSE	FALSE	0
cg01629746	15	80503618	LINC01314	0.836842	0	0.861404	0	TRUE	FALSE	0
cg01642733	8	17780317	PCM1	0.838596	0	0.75614	0.000273778	FALSE	FALSE	0
cg01651728	X	145076186	MIR890	0.870175	0	0.787719	8.93533e-05	FALSE	FALSE	0
cg01665013	3	28944717		0.861404	0	0.522807	0.0232737	FALSE	TRUE	0
cg01673753	X	39546488		0.840351	0	0.84386	0	FALSE	FALSE	0
cg01682370	15	79218994	CTSH	0.880702	0	0.807018	3.46999e-05	TRUE	FALSE	0
cg01683788	X	11777794	MSL3;MSL3;MSL3;MSL3;MSL3	0.847368	0	0.778947	0.000126481	TRUE	FALSE	0
cg01693462	12	7179382		0.875439	0	0.407018	0.0849016	TRUE	FALSE	0
cg01707559	Y	6778695	TBL1Y;TBL1Y;TBL1Y	0.847368	0	0.821053	1.21192e-05	FALSE	FALSE	0
cg01710670	16	15018856		0.868421	0	0.777193	0.000135032	FALSE	FALSE	0
cg01718602	X	85403899	DACH2;DACH2	0.877193	0	0.814035	2.19525e-05	TRUE	FALSE	0
cg01722963	16	88263261		0.864912	0	0.878947	0	FALSE	FALSE	0
cg01733572	16	84209087	DNAAF1	0.878947	0	0.808772	3.12119e-05	FALSE	FALSE	0
cg01737421	X	48367069	PORCN;PORCN;PORCN;PORCN;PORCN	0.836842	0	0.714035	0.000852816	FALSE	FALSE	0
cg01742333	X	55101093	PAGE2B	0.85614	0	0.850877	0	FALSE	FALSE	0
cg01742836	X	135229755	FHL1;FHL1;FHL1;FHL1;FHL1;FHL1;FHL1;FHL1	0.898246	0	0.724561	0.000658097	TRUE	FALSE	0
cg01747155	X	154842516	TMLHE;TMLHE	0.875439	0	0.784211	0.00010313	TRUE	FALSE	0
cg01750780	2	131451266		0.852632	0	0.850877	0	FALSE	FALSE	0
cg01755617	X	153626633	RPL10;RPL10;RPL10	0.898246	0	0.75614	0.000273778	FALSE	FALSE	0
cg01758988	X	148621525	LOC100131434;CXorf40A	0.880702	0	0.731579	0.000549219	TRUE	FALSE	0
cg01762011	X	139173393		0.836842	0	0.754386	0.00028885	FALSE	FALSE	0
cg01769514	7	44181351	MYL7	0.891228	0	0.807018	3.46999e-05	FALSE	FALSE	0
cg01773478	X	46434442	CHST7	0.892982	0	0.757895	0.000259311	FALSE	FALSE	0
cg01776615	17	76160887	C17orf99	0.854386	0	0.847368	0	FALSE	FALSE	0
cg01780361	X	56590386	UBQLN2	0.863158	0	0.719298	0.000750442	TRUE	FALSE	0
cg01782410	4	139621636		0.877193	0	0.761404	0.000232117	TRUE	FALSE	0
cg01783736	2	95454741	ANKRD20B	0.887719	0	0.885965	0	TRUE	FALSE	0
cg01797652	16	21740820	OTOA;OTOA;OTOA	0.840351	0	0.754386	0.00028885	FALSE	FALSE	0
cg01813294	X	17393426	NHS	0.884211	0	0.85614	0	FALSE	FALSE	0
cg01814731	19	45567904	SFRS16	0.891228	0	0.777193	0.000135032	FALSE	FALSE	0
cg01818369	15	48741995	FBN1	0.868421	0	0.838596	0	TRUE	FALSE	0
cg01821635	1	101089253		0.882456	0	0.866667	0	TRUE	FALSE	0
cg01824170	14	100021745	CCDC85C	0.870175	0	0.740351	0.000433605	TRUE	FALSE	0
cg01825872	X	67653324	OPHN1	0.835088	0	0.726316	0.000629407	TRUE	FALSE	0
cg01826367	1	224180288		0.852632	0	0.742105	0.000412963	FALSE	TRUE	0
cg01829036	X	73524446	ZCCHC13	0.877193	0	0.864912	0	FALSE	FALSE	0
cg01832266	21	34144059	C21orf66;C21orf66;C21orf49;C21orf66;C21orf66;C21orf49;C21orf66	0.849123	0	0.675439	0.00199731	FALSE	FALSE	0
cg01847802	6	64345687	PHF3;PHF3	0.868421	0	0.649123	0.00332846	FALSE	FALSE	0
cg01855997	X	49643944	USP27X;LOC158572	0.866667	0	0.770175	0.000173456	TRUE	FALSE	0
cg01857253	X	139014460		0.850877	0	0.708772	0.000966054	TRUE	FALSE	0
cg01871867	2	20838317	HS1BP3	0.845614	0	0.810526	2.79303e-05	TRUE	FALSE	0
cg01872988	13	19692744	DKFZp686A1627	0.838596	0	0.835088	0	TRUE	FALSE	0
cg01886237	4	122378794		0.892982	0	0.875439	0	FALSE	FALSE	0
cg01909103	12	129572610	TMEM132D	0.901754	0	0.75614	0.000273778	FALSE	FALSE	0
cg01910452	X	152989424	BCAP31;BCAP31;ABCD1;BCAP31;BCAP31;BCAP31	0.852632	0	0.798246	5.5546e-05	FALSE	FALSE	0
cg01912435	X	68359870		0.870175	0	0.884211	0	FALSE	FALSE	0
cg01925962	2	27193339	MAPRE3	0.847368	0	0.72807	0.000601715	FALSE	FALSE	0
cg01926740	5	137911361	HSPA9	0.838596	0	0.715789	0.000817526	FALSE	FALSE	0
cg01949832	6	148644988		0.877193	0	0.605263	0.00709942	TRUE	FALSE	0
cg01951307	X	133940723	FAM122C;FAM122C;FAM122C;FAM122C;FAM122C;FAM122C;FAM122C	0.9	0	0.82807	4.73137e-06	FALSE	FALSE	0
cg01952234	11	32457130	WT1;WIT1;WT1;WT1;WT1	0.873684	0	0.875439	0	FALSE	FALSE	0
cg01957799	22	24384135	GSTT1	0.878947	0	0.814035	2.19525e-05	TRUE	FALSE	0
cg01961587	X	54069785	PHF8;PHF8;PHF8;PHF8	0.863158	0	0.803509	4.23294e-05	TRUE	FALSE	0
cg01970554	X	50212323	DGKK	0.838596	0	0.910526	0	FALSE	FALSE	0
cg01991530	X	21857632	MBTPS2	0.905263	0	0.729825	0.000574995	TRUE	FALSE	0
cg01996818	X	131157562	MST4;MST4;MST4	0.866667	0	0.687719	0.00154617	FALSE	FALSE	0
cg02004499	7	4244250	SDK1;SDK1	0.866667	0	0.670175	0.00222081	FALSE	TRUE	0
cg02004872	Y	15815552	TMSB4Y;TMSB4Y	0.877193	0	0.833333	5.45502e-07	FALSE	FALSE	0
cg02006792	X	24295207		0.903509	0	0.714035	0.000852816	TRUE	FALSE	0
cg02010442	X	107335011	ATG4A;PSMD10;ATG4A;PSMD10;ATG4A;ATG4A	0.9	0	0.849123	0	FALSE	FALSE	0
cg02014396	9	103788959		0.84386	0	0.750877	0.000320886	TRUE	FALSE	0
cg02019068	X	48337472	FTSJ1;FTSJ1;FTSJ1	0.889474	0	0.875439	0	FALSE	FALSE	0
cg02019124	7	779736	HEATR2	0.854386	0	0.761404	0.000232117	FALSE	FALSE	0
cg02031980	X	71401203	PIN4;PIN4;PIN4	0.864912	0	0.726316	0.000629407	FALSE	FALSE	0
cg02037232	X	55187701	FAM104B;FAM104B;FAM104B;FAM104B;FAM104B;FAM104B;FAM104B;FAM104B	0.836842	0	0.710526	0.000927047	TRUE	FALSE	0
cg02051981	1	176432162	PAPPA2;PAPPA2	0.845614	0	0.680702	0.00179245	FALSE	FALSE	0
cg02056550	Y	8552374	TTTY18	0.854386	0	0.773684	0.000153372	FALSE	TRUE	0
cg02061906	X	34150514	FAM47A	0.859649	0	0.85614	0	FALSE	FALSE	0
cg02070289	5	43066798		0.836842	0	0.584211	0.00986849	FALSE	FALSE	0
cg02073664	4	72053040	SLC4A4;SLC4A4;SLC4A4;SLC4A4	0.878947	0	0.487719	0.0358489	FALSE	FALSE	0
cg02090742	17	30186405	C17orf79	0.878947	0	0.847368	0	FALSE	TRUE	0
cg02100397	19	646890		0.85614	0	0.882456	0	TRUE	FALSE	0
cg02105393	Y	2804282	ZFY;ZFY;ZFY	0.875439	0	0.736842	0.000477298	FALSE	FALSE	0
cg02105736	X	128812105		0.870175	0	0.792982	7.1125e-05	FALSE	FALSE	0
cg02110822	X	76711903	FGF16	0.9	0	0.9	0	FALSE	FALSE	0
cg02120513	5	36722752		0.852632	0	0.778947	0.000126481	FALSE	FALSE	0
cg02127560	6	21762559	FLJ22536	0.875439	0	0.74386	0.000393093	FALSE	FALSE	0
cg02138606	Y	13909413		0.852632	0	0.798246	5.5546e-05	FALSE	FALSE	0
cg02146966	17	18967117		0.845614	0	0.798246	5.5546e-05	FALSE	FALSE	0
cg02154269	4	4228637	OTOP1	0.859649	0	0.857895	0	FALSE	FALSE	0
cg02158056	16	88354028		0.850877	0	0.859649	0	FALSE	TRUE	0
cg02161919	X	19002980	PHKA2	0.884211	0	0.736842	0.000477298	FALSE	FALSE	0
cg02165720	X	47004051	NDUFB11;NDUFB11;NDUFB11;RBM10;NDUFB11;RBM10	0.84386	0	0.773684	0.000153372	TRUE	FALSE	0
cg02168333	X	136914292		0.864912	0	0.845614	0	FALSE	FALSE	0
cg02173328	14	74877620	SYNDIG1L	0.908772	0	0.914035	7.57378e-08	TRUE	FALSE	0
cg02173876	12	28123405	PTHLH;PTHLH;PTHLH;PTHLH	0.845614	0	0.757895	0.000259311	FALSE	FALSE	0
cg02187432	X	18371852	SCML2	0.859649	0	0.787719	8.93533e-05	FALSE	FALSE	0
cg02196458	15	90809250	NGRN;NGRN	0.842105	0	0.84386	0	FALSE	TRUE	0
cg02212907	X	55188884	FAM104B;FAM104B;FAM104B;FAM104B;FAM104B;FAM104B;FAM104B;FAM104B	0.884211	0	0.875439	0	FALSE	FALSE	0
cg02215080	1	245496589	KIF26B	0.838596	0	0.903509	0	TRUE	FALSE	0
cg02217425	17	42366503		0.847368	0	0.801754	4.64892e-05	TRUE	FALSE	0
cg02225164	X	153979588	GAB3;GAB3	0.852632	0	0.622807	0.00530932	FALSE	FALSE	0
cg02246922	6	29342824	OR12D3	0.864912	0	0.880702	0	TRUE	FALSE	0
cg02254261	7	158964346		0.854386	0	0.589474	0.00910547	FALSE	TRUE	0
cg02261899	X	125686940	DCAF12L1	0.85614	0	0.863158	0	FALSE	FALSE	0
cg02263675	X	84500028	ZNF711	0.838596	0	0.824561	8.14662e-06	TRUE	FALSE	0
cg02264182	X	148586734	IDS;IDS;IDS;IDS;IDS;IDS	0.852632	0	0.850877	0	TRUE	FALSE	0
cg02267698	19	7991119	CTXN1	0.857895	0	0.761404	0.000232117	FALSE	TRUE	0
cg02275930	1	2372054		0.878947	0	0.664912	0.00246427	FALSE	TRUE	0
cg02282594	14	23399066	PRMT5;PRMT5;PRMT5;PRMT5;PRMT5;PRMT5;LOC101926933	0.868421	0	0.892982	0	FALSE	FALSE	0
cg02283535	X	103811660	IL1RAPL2;IL1RAPL2	0.852632	0	0.736842	0.000477298	TRUE	FALSE	0
cg02285254	X	135229382	FHL1;FHL1;FHL1;FHL1;FHL1	0.898246	0	0.749123	0.000337889	FALSE	FALSE	0
cg02287936	X	18443686	CDKL5	0.907018	0	0.894737	0	FALSE	FALSE	0
cg02290962	X	134477987	ZNF75D;ZNF449;ZNF75D;ZNF75D	0.868421	0	0.915789	4.40065e-07	TRUE	FALSE	0
cg02291897	X	47509947	ELK1;ELK1;ELK1;ELK1	0.861404	0	0.624561	0.00515281	TRUE	FALSE	0
cg02293258	X	57147872	SPIN2B;SPIN2B;SPIN2B;SPIN2B;SPIN2B;SPIN2B	0.842105	0	0.705263	0.00104802	FALSE	FALSE	0
cg02295504	X	100878362	ARMCX3;ARMCX3;ARMCX3;ARMCX3	0.894737	0	0.705263	0.00104802	TRUE	FALSE	0
cg02300694	9	66553935	LOC728673;LOC403323;LOC403323	0.907018	0	0.878947	0	FALSE	FALSE	0
cg02301364	X	106871826	PRPS1;PRPS1	0.875439	0	0.829825	3.21707e-06	TRUE	FALSE	0
cg02309026	10	855060		0.85614	0	0.877193	0	FALSE	FALSE	0
cg02326006	X	62974433	ARHGEF9;ARHGEF9	0.854386	0	0.740351	0.000433605	FALSE	FALSE	0
cg02327189	7	57830004		0.896491	0	0.817544	1.67023e-05	FALSE	FALSE	0
cg02333283	X	153707099	LAGE3	0.882456	0	0.761404	0.000232117	FALSE	FALSE	0
cg02336608	X	18693859		0.835088	0	0.821053	1.21192e-05	FALSE	FALSE	0
cg02339015	20	62561062	DNAJC5	0.842105	0	0.750877	0.000320886	FALSE	FALSE	0
cg02343451	16	3418885		0.836842	0	0.845614	0	FALSE	FALSE	0
cg02370566	17	78716850	RPTOR;RPTOR	0.840351	0	0.794737	6.56523e-05	TRUE	FALSE	0
cg02386310	X	48367223	PORCN;PORCN;PORCN;PORCN;PORCN	0.868421	0	0.708772	0.000966054	FALSE	FALSE	0
cg02395762	X	117982936	LINC01285	0.849123	0	0.896491	0	FALSE	FALSE	0
cg02401352	15	89354338	ACAN;ACAN	0.907018	0	0.863158	0	TRUE	FALSE	0
cg02403546	15	65990692	DENND4A;DENND4A	0.854386	0	0.789474	8.29641e-05	FALSE	FALSE	0
cg02443025	12	106775762	POLR3B;POLR3B	0.838596	0	0.754386	0.00028885	FALSE	FALSE	0
cg02451774	1	147801218		0.85614	0	0.821053	1.21192e-05	FALSE	FALSE	0
cg02456060	3	23313810	UBE2E2	0.901754	0	0.885965	0	TRUE	FALSE	0
cg02456976	7	107498218		0.84386	0	0.835088	0	TRUE	FALSE	0
cg02464073	21	46349496	ITGB2	0.866667	0	0.798246	5.5546e-05	TRUE	FALSE	0
cg02479782	2	71033156		0.880702	0	0.735088	0.000500396	TRUE	FALSE	0
cg02486009	15	22428395		0.849123	0	0.819298	1.4331e-05	FALSE	FALSE	0
cg02489479	X	71536273		0.873684	0	0.863158	0	FALSE	FALSE	0
cg02496423	X	21958619	SMS	0.854386	0	0.703509	0.00109104	TRUE	FALSE	0
cg02510708	X	123095692	STAG2;STAG2;STAG2;STAG2;STAG2;STAG2;STAG2	0.892982	0	0.685965	0.00160499	TRUE	FALSE	0
cg02520942	X	128782756	APLN;APLN	0.847368	0	0.838596	0	FALSE	FALSE	0
cg02535684	10	33339108		0.835088	0	0.840351	0	FALSE	TRUE	0
cg02539591	X	24483092	PDK3;PDK3	0.863158	0	0.752632	0.000304546	FALSE	FALSE	0
cg02540440	X	39866758		0.857895	0	0.752632	0.000304546	FALSE	FALSE	0
cg02546416	6	170487311		0.894737	0	0.836842	0	FALSE	TRUE	0
cg02554605	14	60715777	PPM1A;PPM1A;PPM1A	0.863158	0	0.761404	0.000232117	FALSE	FALSE	0
cg02562246	17	72772661	NAT9;NAT9;NAT9;NAT9;NAT9;NAT9;NAT9;NAT9;NAT9;NAT9;NAT9;NAT9;NAT9;NAT9;NAT9;TMEM104;TMEM104	0.845614	0	0.698246	0.00122872	FALSE	FALSE	0
cg02581727	X	134478016	ZNF449;ZNF75D	0.84386	0	0.715789	0.000817526	FALSE	FALSE	0
cg02582450	Y	14075806		0.884211	0	0.645614	0.00355061	FALSE	FALSE	0
cg02589074	X	148586938	IDS;IDS;IDS	0.870175	0	0.838596	0	TRUE	FALSE	0
cg02602925	6	171019460		0.84386	0	0.759649	0.00024543	FALSE	FALSE	0
cg02609263	2	33282816	LTBP1	0.863158	0	0.884211	0	FALSE	FALSE	0
cg02616921	X	69455617	AWAT1	0.850877	0	0.849123	0	FALSE	FALSE	0
cg02621658	X	67867676	STARD8;STARD8;STARD8;STARD8	0.875439	0	0.689474	0.0014891	TRUE	FALSE	0
cg02622708	15	40686105	KNSTRN;KNSTRN;KNSTRN	0.85614	0	0.836842	0	FALSE	FALSE	0
cg02623256	X	24483231	PDK3;PDK3	0.887719	0	0.750877	0.000320886	FALSE	FALSE	0
cg02624129	11	130786230	SNX19;SNX19	0.838596	0	0.714035	0.000852816	FALSE	TRUE	0
cg02624484	X	24043392	KLHL15	0.861404	0	0.685965	0.00160499	FALSE	FALSE	0
cg02627787	X	152793857		0.845614	0	0.842105	0	FALSE	FALSE	0
cg02627872	1	229260510		0.875439	0	0.782456	0.000110543	TRUE	FALSE	0
cg02628858	13	29910801	MTUS2	0.9	0	0.787719	8.93533e-05	TRUE	FALSE	0
cg02634083	X	150153136	HMGB3	0.835088	0	0.770175	0.000173456	FALSE	FALSE	0
cg02645808	X	54557502	GNL3L;GNL3L	0.847368	0	0.770175	0.000173456	FALSE	FALSE	0
cg02656959	1	21786446	NBPF3	0.838596	0	0.812281	2.48466e-05	FALSE	FALSE	0
cg02668233	12	125813494	TMEM132B	0.838596	0	0.817544	1.67023e-05	TRUE	FALSE	0
cg02674186	4	88784891		0.864912	0	0.778947	0.000126481	FALSE	TRUE	0
cg02682989	X	153714605	UBL4A	0.835088	0	0.721053	0.000718586	TRUE	FALSE	0
cg02686174	17	36653866	ARHGAP23	0.854386	0	0.72807	0.000601715	FALSE	FALSE	0
cg02716302	4	190960010		0.863158	0	0.896491	0	FALSE	FALSE	0
cg02716388	10	133376942		0.864912	0	0.708772	0.000966054	FALSE	FALSE	0
cg02717988	19	57922560	ZNF17;ZNF17	0.849123	0	0.717544	0.000783412	FALSE	FALSE	0
cg02725885	19	291239	PPAP2C;PPAP2C;PPAP2C	0.84386	0	0.824561	8.14662e-06	FALSE	FALSE	0
cg02730008	Y	15814320	TMSB4Y	0.868421	0	0.791228	7.68918e-05	TRUE	TRUE	0
cg02742990	X	24665458	PCYT1B;PCYT1B;PCYT1B	0.901754	0	0.773684	0.000153372	FALSE	FALSE	0
cg02756511	X	106693692		0.873684	0	0.759649	0.00024543	TRUE	FALSE	0
cg02761287	21	47878740	DIP2A;DIP2A;DIP2A;DIP2A;DIP2A;DIP2A	0.87193	0	0.84386	0	FALSE	FALSE	0
cg02769058	2	151760164		0.896491	0	0.819298	1.4331e-05	FALSE	FALSE	0
cg02772171	5	171054642		0.901754	0	0.807018	3.46999e-05	TRUE	FALSE	0
cg02772880	16	71260651	HYDIN;HYDIN	0.852632	0	0.778947	0.000126481	TRUE	FALSE	0
cg02794321	X	109561119	AMMECR1;AMMECR1;AMMECR1	0.847368	0	0.75614	0.000273778	TRUE	FALSE	0
cg02797771	1	110254603	GSTM5	0.870175	0	0.773684	0.000153372	FALSE	FALSE	0
cg02799972	X	47383109		0.9	0	0.740351	0.000433605	FALSE	FALSE	0
cg02800016	X	100740430	ARMCX4;ARMCX4;ARMCX4;ARMCX4;ARMCX4	0.847368	0	0.805263	3.84027e-05	TRUE	FALSE	0
cg02803670	X	134478751	ZNF75D;ZNF449;ZNF449	0.873684	0	0.842105	0	FALSE	FALSE	0
cg02819655	2	178853377	PDE11A;PDE11A	0.838596	0	0.787719	8.93533e-05	TRUE	FALSE	0
cg02834750	X	133119866	GPC3;GPC3;GPC3;GPC3	0.864912	0	0.764912	0.000207123	FALSE	FALSE	0
cg02836821	X	132095360	HS6ST2;HS6ST2;HS6ST2;HS6ST2	0.891228	0	0.770175	0.000173456	FALSE	FALSE	0
cg02839557	Y	6778641	TBL1Y;TBL1Y;TBL1Y	0.84386	0	0.72807	0.000601715	FALSE	FALSE	0
cg02856792	X	48769319	SLC35A2;SLC35A2;SLC35A2	0.889474	0	0.870175	0	FALSE	FALSE	0
cg02857405	X	39684999		0.891228	0	0.74386	0.000393093	FALSE	TRUE	0
cg02858817	X	26155148	MAGEB18	0.85614	0	0.82807	4.73137e-06	FALSE	FALSE	0
cg02859511	7	1609828	KIAA1908;KIAA1908;PSMG3;KIAA1908;PSMG3	0.903509	0	0.877193	0	FALSE	FALSE	0
cg02859554	X	19140359	GPR64;GPR64;GPR64;GPR64	0.87193	0	0.685965	0.00160499	FALSE	FALSE	0
cg02871887	X	153626455	RPL10;RPL10	0.880702	0	0.819298	1.4331e-05	TRUE	FALSE	0
cg02878244	11	20181911	DBX1	0.854386	0	0.738596	0.000455042	FALSE	FALSE	0
cg02882301	X	49126157	PPP1R3F	0.903509	0	0.773684	0.000153372	TRUE	FALSE	0
cg02883100	X	53460671	HSD17B10;HSD17B10	0.903509	0	0.8	5.08914e-05	FALSE	TRUE	0
cg02889777	17	37213271		0.903509	0	0.829825	3.21707e-06	FALSE	FALSE	0
cg02890259	1	16345207	HSPB7;HSPB7	0.852632	0	0.833333	5.45502e-07	TRUE	FALSE	0
cg02890812	X	129114962		0.84386	0	0.849123	0	TRUE	FALSE	0
cg02896496	X	54385394	WNK3;WNK3	0.857895	0	0.884211	0	TRUE	FALSE	0
cg02901522	8	129082086	PVT1	0.878947	0	0.735088	0.000500396	TRUE	FALSE	0
cg02904184	X	40126247		0.894737	0	0.894737	0	FALSE	FALSE	0
cg02907374	11	15095028	CALCB	0.9	0	0.685965	0.00160499	FALSE	FALSE	0
cg02907441	X	37026364	FAM47C	0.842105	0	0.829825	3.21707e-06	FALSE	FALSE	0
cg02910887	X	56815498	LINC01420	0.868421	0	0.510526	0.0271916	FALSE	FALSE	0
cg02915803	1	1606292	LOC728661;CDK11B;CDK11B;CDK11B;CDK11B;CDK11B;CDK11B	0.852632	0	0.673684	0.00206967	FALSE	TRUE	0
cg02921434	X	146993433	ASFMR1;FMR1;ASFMR1;ASFMR1;ASFMR1;ASFMR1	0.840351	0	0.736842	0.000477298	TRUE	FALSE	0
cg02922510	7	156869431		0.887719	0	0.850877	0	TRUE	FALSE	0
cg02933448	X	34675521	TMEM47	0.84386	0	0.77193	0.000163189	TRUE	FALSE	0
cg02937331	X	63413189	AMER1	0.85614	0	0.877193	0	FALSE	FALSE	0
cg02938958	X	25022847	ARX	0.84386	0	0.749123	0.000337889	FALSE	FALSE	0
cg02940028	X	100306693	TRMT2B;TRMT2B;TRMT2B;TRMT2B	0.835088	0	0.784211	0.00010313	FALSE	FALSE	0
cg02953041	X	100351158	TMEM35	0.894737	0	0.85614	0	FALSE	FALSE	0
cg02953382	22	24373134	LOC391322;LOC391322	0.868421	0	0.815789	1.92403e-05	FALSE	TRUE	0
cg02954623	X	84258791	APOOL	0.838596	0	0.822807	1.006e-05	TRUE	FALSE	0
cg02954704	1	161349006		0.903509	0	0.829825	3.21707e-06	FALSE	TRUE	0
cg02958670	4	57256689		0.864912	0	0.719298	0.000750442	TRUE	FALSE	0
cg02964182	2	183473236		0.87193	0	0.831579	1.82368e-06	FALSE	FALSE	0
cg02968327	15	81584389	IL16;IL16	0.896491	0	0.85614	0	TRUE	FALSE	0
cg02969243	X	11445762	ARHGAP6;ARHGAP6	0.854386	0	0.738596	0.000455042	FALSE	FALSE	0
cg02969603	X	122252003		0.838596	0	0.764912	0.000207123	FALSE	FALSE	0
cg02970498	13	40795744	LINC00548	0.875439	0	0.708772	0.000966054	FALSE	FALSE	0
cg02971902	X	135991927		0.849123	0	0.701754	0.00113548	FALSE	FALSE	0
cg02973971	X	149106460	LOC100272228;CXorf40B;CXorf40B	0.892982	0	0.801754	4.64892e-05	TRUE	FALSE	0
cg02990147	X	24329623	FAM48B2	0.870175	0	0.738596	0.000455042	FALSE	FALSE	0
cg02996355	14	81879375		0.875439	0	0.819298	1.4331e-05	FALSE	TRUE	0
cg03001901	19	14248008	ASF1B	0.84386	0	0.650877	0.00322172	FALSE	FALSE	0
cg03013609	1	236702902	LGALS8;LGALS8;LGALS8;LGALS8	0.903509	0	0.907018	0	TRUE	FALSE	0
cg03035653	X	99662932	PCDH19;PCDH19	0.868421	0	0.845614	0	FALSE	FALSE	0
cg03038395	X	25031600	ARX	0.875439	0	0.798246	5.5546e-05	TRUE	FALSE	0
cg03039483	X	83757499	HDX	0.849123	0	0.861404	0	FALSE	FALSE	0
cg03045133	6	29870056	HCG2P7	0.870175	0	0.842105	0	TRUE	FALSE	0
cg03047376	8	143480668	TSNARE1;TSNARE1	0.849123	0	0.696491	0.0012776	TRUE	FALSE	0
cg03052080	2	121342766		0.852632	0	0.710526	0.000927047	FALSE	FALSE	0
cg03057303	17	74558057	SNHG16;SNHG16;SNHG16;SNHG16	0.870175	0	0.821053	1.21192e-05	TRUE	FALSE	0
cg03058232	1	180923340		0.836842	0	0.835088	0	FALSE	TRUE	0
cg03059667	X	144899578	SLITRK2;SLITRK2;SLITRK2;SLITRK2	0.835088	0	0.770175	0.000173456	FALSE	FALSE	0
cg03061353	X	153029505	PLXNB3;PLXNB3	0.878947	0	0.72807	0.000601715	FALSE	FALSE	0
cg03063185	6	86303159	SNX14;SNX14	0.845614	0	0.789474	8.29641e-05	FALSE	TRUE	0
cg03078816	8	143361320	TSNARE1	0.905263	0	0.826316	6.37252e-06	TRUE	FALSE	0
cg03099683	4	132661931		0.898246	0	0.810526	2.79303e-05	FALSE	TRUE	0
cg03102729	X	120181504	GLUD2;GLUD2	0.9	0	0.805263	3.84027e-05	FALSE	FALSE	0
cg03119308	7	127950724	RBM28;RBM28	0.878947	0	0.907018	0	TRUE	FALSE	0
cg03120461	X	12993214	TMSB4X;TMSL3	0.838596	0	0.773684	0.000153372	TRUE	FALSE	0
cg03122926	7	2425741		0.845614	0	0.77193	0.000163189	TRUE	FALSE	0
cg03134882	10	135341463	CYP2E1	0.854386	0	0.691228	0.00143375	FALSE	FALSE	0
cg03135351	2	29338258	CLIP4	0.863158	0	0.664912	0.00246427	FALSE	FALSE	0
cg03144222	7	23290325	GPNMB;GPNMB	0.842105	0	0.819298	1.4331e-05	FALSE	FALSE	0
cg03144406	17	78022789	CCDC40;CCDC40	0.861404	0	0.803509	4.23294e-05	FALSE	FALSE	0
cg03161606	19	29218774		0.894737	0	0.854386	0	FALSE	TRUE	0
cg03162686	16	89346269	ANKRD11	0.866667	0	0.750877	0.000320886	FALSE	TRUE	0
cg03178781	7	75650855	STYXL1	0.873684	0	0.787719	8.93533e-05	FALSE	TRUE	0
cg03185552	17	81060259		0.880702	0	0.903509	0	TRUE	FALSE	0
cg03188390	8	43131535		0.847368	0	0.761404	0.000232117	FALSE	FALSE	0
cg03189022	X	153237590	TMEM187;HCFC1	0.907018	0	0.710526	0.000927047	FALSE	FALSE	0
cg03198009	6	29648604		0.838596	0	0.733333	0.000524361	TRUE	FALSE	0
cg03199955	X	30671630	GK;GK;GK;GK;GK;GK	0.87193	0	0.863158	0	FALSE	FALSE	0
cg03213502	X	69501023	ARR3;RAB41	0.852632	0	0.835088	0	FALSE	FALSE	0
cg03217679	4	73935524	COX18	0.849123	0	0.742105	0.000412963	FALSE	FALSE	0
cg03218192	17	33914403	AP2B1;AP2B1;AP2B1;AP2B1	0.847368	0	0.812281	2.48466e-05	FALSE	FALSE	0
cg03226599	12	75552981	KCNC2;KCNC2;KCNC2;KCNC2;KCNC2;KCNC2	0.854386	0	0.789474	8.29641e-05	FALSE	FALSE	0
cg03226871	2	128128958		0.849123	0	0.836842	0	FALSE	FALSE	0
cg03227505	2	89523126		0.859649	0	0.750877	0.000320886	FALSE	FALSE	0
cg03239936	13	111042840	COL4A2	0.870175	0	0.624561	0.00515281	TRUE	FALSE	0
cg03242668	16	86556405		0.896491	0	0.801754	4.64892e-05	FALSE	FALSE	0
cg03244432	X	48367513	PORCN;PORCN;PORCN;PORCN;PORCN	0.835088	0	0.731579	0.000549219	FALSE	FALSE	0
cg03250346	X	24042976	KLHL15	0.861404	0	0.778947	0.000126481	TRUE	FALSE	0
cg03262205	2	178417515	TTC30B;TTC30B	0.84386	0	0.657895	0.00282231	FALSE	FALSE	0
cg03263197	1	110654497	UBL4B	0.842105	0	0.731579	0.000549219	TRUE	FALSE	0
cg03310203	X	151806811	GABRQ	0.836842	0	0.785965	9.60713e-05	TRUE	FALSE	0
cg03324099	2	52761238		0.889474	0	0.8	5.08914e-05	TRUE	FALSE	0
cg03327327	1	214779620	CENPF	0.85614	0	0.589474	0.00910547	FALSE	TRUE	0
cg03334316	X	54209370	FAM120C	0.861404	0	0.722807	0.000687814	TRUE	FALSE	0
cg03335173	X	151806923	GABRQ	0.878947	0	0.761404	0.000232117	TRUE	FALSE	0
cg03344283	15	20562413		0.864912	0	0.785965	9.60713e-05	FALSE	FALSE	0
cg03354101	X	122756981	THOC2	0.838596	0	0.880702	0	FALSE	FALSE	0
cg03354744	4	185655229	MLF1IP;MLF1IP	0.836842	0	0.852632	0	FALSE	FALSE	0
cg03360374	X	48980258	GPKOW	0.84386	0	0.747368	0.000355578	FALSE	FALSE	0
cg03364121	X	119379165	CXorf42	0.882456	0	0.777193	0.000135032	FALSE	FALSE	0
cg03364150	10	46947700		0.868421	0	0.84386	0	FALSE	FALSE	0
cg03370193	X	31284813	DMD;DMD;DMD;DMD;DMD;DMD;DMD;DMD;DMD;DMD;DMD;DMD;DMD;DMD;DMD;DMD;DMD;DMD	0.859649	0	0.785965	9.60713e-05	TRUE	FALSE	0
cg03372815	X	150067397	CD99L2;CD99L2;CD99L2	0.857895	0	0.822807	1.006e-05	TRUE	FALSE	0
cg03373091	22	38902403	DDX17;DDX17	0.854386	0	0.540351	0.0184736	FALSE	FALSE	0
cg03391801	X	153607825	EMD;EMD	0.898246	0	0.717544	0.000783412	TRUE	FALSE	0
cg03395495	15	84821396		0.887719	0	0.805263	3.84027e-05	FALSE	FALSE	0
cg03403686	16	1254199	CACNA1H;CACNA1H	0.875439	0	0.529825	0.0212465	FALSE	FALSE	0
cg03410547	X	103294340	H2BFM	0.84386	0	0.889474	0	FALSE	FALSE	0
cg03410772	6	29970005	NCRNA00171	0.85614	0	0.861404	0	FALSE	FALSE	0
cg03430010	Y	15591607	UTY;UTY;UTY;UTY;UTY;UTY	0.842105	0	0.866667	0	FALSE	FALSE	0
cg03433758	15	91073105	CRTC3;CRTC3	0.861404	0	0.710526	0.000927047	FALSE	FALSE	0
cg03442220	10	80203295		0.836842	0	0.829825	3.21707e-06	FALSE	FALSE	0
cg03443112	2	68251804		0.845614	0	0.845614	0	FALSE	TRUE	0
cg03449857	6	29648623		0.857895	0	0.775439	0.000143992	TRUE	FALSE	0
cg03460546	X	128788127	APLN	0.836842	0	0.763158	0.000219354	TRUE	FALSE	0
cg03467235	20	21003839		0.896491	0	0.861404	0	TRUE	FALSE	0
cg03467424	10	32635820	EPC1;EPC1;LOC102031319;EPC1;EPC1;EPC1;EPC1	0.836842	0	0.707018	0.00100637	FALSE	FALSE	0
cg03487706	X	54666256		0.859649	0	0.729825	0.000574995	TRUE	FALSE	0
cg03508204	2	129057540	HS6ST1	0.903509	0	0.67193	0.00214416	FALSE	FALSE	0
cg03517379	X	118740406	NKRF	0.852632	0	0.712281	0.000889312	FALSE	FALSE	0
cg03523199	X	133593973	HPRT1	0.892982	0	0.810526	2.79303e-05	FALSE	FALSE	0
cg03529275	X	130202832	ARHGAP36;ARHGAP36	0.898246	0	0.785965	9.60713e-05	TRUE	FALSE	0
cg03534059	X	153665491	GDI1;GDI1	0.845614	0	0.745614	0.000373971	FALSE	FALSE	0
cg03536466	16	4784145	ANKS3;C16orf71;ANKS3	0.836842	0	0.585965	0.00960858	FALSE	FALSE	0
cg03538996	X	68837002	EDA;EDA;EDA;EDA;EDA	0.842105	0	0.7	0.00118136	FALSE	FALSE	0
cg03559235	2	100937944	LONRF2	0.866667	0	0.780702	0.000118322	FALSE	FALSE	0
cg03564573	1	26798737	HMGN2	0.840351	0	0.836842	0	FALSE	FALSE	0
cg03572700	X	7000572	HDHD1;HDHD1;HDHD1;HDHD1	0.868421	0	0.701754	0.00113548	TRUE	FALSE	0
cg03573944	19	44861370	ZNF112;ZNF112	0.847368	0	0.705263	0.00104802	FALSE	FALSE	0
cg03575468	X	19362613	PDHA1	0.898246	0	0.62807	0.00485109	FALSE	FALSE	0
cg03579474	8	144463816	RHPN1	0.912281	0	0.510526	0.0271916	FALSE	FALSE	0
cg03580328	X	73641615	SLC16A2	0.850877	0	0.759649	0.00024543	TRUE	FALSE	0
cg03590418	X	153570171		0.852632	0	0.703509	0.00109104	TRUE	FALSE	0
cg03594447	1	20359744		0.836842	0	0.733333	0.000524361	FALSE	FALSE	0
cg03598801	6	32292992	C6orf10	0.835088	0	0.829825	3.21707e-06	TRUE	FALSE	0
cg03598919	X	51150887	CXorf67	0.885965	0	0.785965	9.60713e-05	FALSE	FALSE	0
cg03605032	X	149533195		0.907018	0	0.729825	0.000574995	TRUE	FALSE	0
cg03619648	X	37765256		0.84386	0	0.784211	0.00010313	TRUE	FALSE	0
cg03622778	X	71344244	NHSL2	0.878947	0	0.801754	4.64892e-05	FALSE	FALSE	0
cg03623565	X	15808502	ZRSR2	0.836842	0	0.810526	2.79303e-05	FALSE	FALSE	0
cg03650730	2	242254743	SEPT2;SEPT2;SEPT2;SEPT2;SEPT2;SEPT2;SEPT2;SEPT2;HDLBP	0.889474	0	0.749123	0.000337889	FALSE	FALSE	0
cg03658699	19	4564376		0.849123	0	0.721053	0.000718586	FALSE	FALSE	0
cg03665601	X	77040152	ATRX;ATRX	0.849123	0	0.824561	8.14662e-06	TRUE	FALSE	0
cg03672716	3	75708104		0.838596	0	0.85614	0	FALSE	FALSE	0
cg03689070	10	133466918		0.901754	0	0.896491	0	TRUE	FALSE	0
cg03691313	X	153603062	FLNA;FLNA	0.85614	0	0.757895	0.000259311	TRUE	FALSE	0
cg03695421	Y	14074773		0.873684	0	0.745614	0.000373971	FALSE	FALSE	0
cg03697143	6	107231242	MIR587;LOC100422737	0.901754	0	0.22807	0.346125	FALSE	FALSE	0
cg03734380	X	11446028	ARHGAP6;ARHGAP6;ARHGAP6;ARHGAP6	0.898246	0	0.77193	0.000163189	FALSE	FALSE	0
cg03735049	X	54466618	TSR2	0.896491	0	0.801754	4.64892e-05	FALSE	FALSE	0
cg03747858	2	234121294		0.835088	0	0.833333	5.45502e-07	TRUE	FALSE	0
cg03748372	X	49126128	PPP1R3F	0.847368	0	0.733333	0.000524361	TRUE	FALSE	0
cg03751162	X	54466849	TSR2	0.836842	0	0.775439	0.000143992	TRUE	FALSE	0
cg03752386	X	102752443		0.854386	0	0.761404	0.000232117	FALSE	FALSE	0
cg03754195	X	119694964	CUL4B;CUL4B	0.835088	0	0.72807	0.000601715	FALSE	FALSE	0
cg03768687	X	70288358	SNX12	0.892982	0	0.852632	0	FALSE	FALSE	0
cg03770889	5	2352730		0.852632	0	0.864912	0	TRUE	FALSE	0
cg03796003	16	2746544	KCTD5	0.903509	0	0.810526	2.79303e-05	TRUE	FALSE	0
cg03804755	16	56677634	MT1DP;MT1DP	0.847368	0	0.731579	0.000549219	FALSE	FALSE	0
cg03805048	X	75648083	MAGEE1	0.859649	0	0.8	5.08914e-05	FALSE	FALSE	0
cg03810198	17	74679597	MXRA7;MXRA7;MXRA7	0.85614	0	0.822807	1.006e-05	TRUE	FALSE	0
cg03814733	X	149106755	CXorf40B;LOC100272228	0.863158	0	0.778947	0.000126481	FALSE	FALSE	0
cg03821116	5	1498985	LPCAT1	0.870175	0	0.821053	1.21192e-05	FALSE	FALSE	0
cg03821767	X	119123179		0.875439	0	0.898246	0	FALSE	FALSE	0
cg03830082	20	2672100	EBF4	0.875439	0	0.880702	0	FALSE	FALSE	0
cg03831206	X	48814955	OTUD5;OTUD5;OTUD5;OTUD5	0.892982	0	0.689474	0.0014891	FALSE	FALSE	0
cg03835117	X	48815581	OTUD5;OTUD5;OTUD5;OTUD5;OTUD5	0.836842	0	0.722807	0.000687814	FALSE	FALSE	0
cg03842291	X	34675964	TMEM47	0.845614	0	0.773684	0.000153372	TRUE	FALSE	0
cg03847932	3	73045556	PPP4R2	0.859649	0	0.796491	6.04628e-05	FALSE	TRUE	0
cg03849132	8	104137224		0.882456	0	0.826316	6.37252e-06	FALSE	FALSE	0
cg03849262	X	151935380	MAGEA3	0.850877	0	0.907018	0	FALSE	FALSE	0
cg03858262	X	70473929	ZMYM3;ZMYM3;BCYRN1;ZMYM3;ZMYM3;ZMYM3	0.852632	0	0.724561	0.000658097	TRUE	FALSE	0
cg03868770	22	30783737	RNF215	0.847368	0	0.838596	0	FALSE	TRUE	0
cg03885028	X	118890879		0.907018	0	0.910526	0	TRUE	FALSE	0
cg03885818	12	2299830	CACNA1C;CACNA1C;CACNA1C;CACNA1C;CACNA1C;CACNA1C;CACNA1C;CACNA1C;CACNA1C;CACNA1C;CACNA1C;CACNA1C;CACNA1C;CACNA1C;CACNA1C;CACNA1C;CACNA1C;CACNA1C;CACNA1C;CACNA1C;CACNA1C;CACNA1C;CACNA1C	0.870175	0	0.821053	1.21192e-05	FALSE	FALSE	0
cg03889767	4	987672	IDUA;SLC26A1;SLC26A1;SLC26A1	0.849123	0	0.85614	0	FALSE	FALSE	0
cg03894002	X	69664599	DLG3	0.847368	0	0.692982	0.00138008	TRUE	FALSE	0
cg03905487	X	53123054		0.87193	0	0.75614	0.000273778	TRUE	FALSE	0
cg03906572	X	152676991		0.885965	0	0.761404	0.000232117	TRUE	FALSE	0
cg03913278	8	11995002	FAM66D;USP17L2	0.845614	0	0.805263	3.84027e-05	FALSE	FALSE	0
cg03916902	14	31495714	STRN3;STRN3;AP4S1;AP4S1;AP4S1;AP4S1;AP4S1;AP4S1	0.849123	0	0.873684	0	FALSE	FALSE	0
cg03929089	4	120376271		0.87193	0	0.754386	0.00028885	FALSE	TRUE	0
cg03939054	11	96076473	MAML2	0.836842	0	0.752632	0.000304546	FALSE	FALSE	0
cg03940883	16	14380714		0.850877	0	0.901754	0	TRUE	FALSE	0
cg03944921	X	117479980	WDR44	0.835088	0	0.731579	0.000549219	TRUE	FALSE	0
cg03948928	X	150250878		0.842105	0	0.796491	6.04628e-05	FALSE	FALSE	0
cg03958744	13	114795097	RASA3	0.903509	0	0.814035	2.19525e-05	FALSE	FALSE	0
cg03964091	22	49062324	FAM19A5;FAM19A5	0.838596	0	0.785965	9.60713e-05	TRUE	FALSE	0
cg03965172	4	3683268		0.868421	0	0.621053	0.0054697	TRUE	FALSE	0
cg03967651	1	43447310	SLC2A1-AS1	0.894737	0	0.905263	0	TRUE	FALSE	0
cg03971469	X	25031338	ARX	0.845614	0	0.798246	5.5546e-05	FALSE	FALSE	0
cg03977822	X	70503563	NONO;NONO;NONO;NONO;BCYRN1;NONO;NONO;NONO;NONO	0.849123	0	0.854386	0	FALSE	FALSE	0
cg03979311	5	54319996	GZMK	0.878947	0	0.845614	0	FALSE	FALSE	0
cg03982462	6	159888248		0.845614	0	0.861404	0	TRUE	FALSE	0
cg03991766	X	9755100	SHROOM2	0.907018	0	0.815789	1.92403e-05	FALSE	FALSE	0
cg03993166	15	101817914	SELS;SELS	0.896491	0	0.857895	0	FALSE	TRUE	0
cg03993368	X	134479056	ZNF75D;ZNF449	0.840351	0	0.670175	0.00222081	TRUE	FALSE	0
cg03993934	X	101411275	BEX5;BEX5	0.875439	0	0.847368	0	FALSE	FALSE	0
cg03995571	8	130952330	FAM49B	0.891228	0	0.505263	0.0290236	FALSE	FALSE	0
cg03996447	X	19533577	MAP3K15	0.877193	0	0.819298	1.4331e-05	TRUE	FALSE	0
cg04013915	X	15586143	ACE2	0.870175	0	0.812281	2.48466e-05	FALSE	FALSE	0
cg04016144	Y	9215053	TSPY4;TSPY4	0.854386	0	0.619298	0.00563401	FALSE	FALSE	0
cg04023335	Y	14100573		0.907018	0	0.882456	0	FALSE	FALSE	0
cg04025307	7	1156635	C7orf50;C7orf50;C7orf50	0.835088	0	0.877193	0	FALSE	TRUE	0
cg04025582	X	100645906	RPL36A	0.849123	0	0.745614	0.000373971	FALSE	FALSE	0
cg04026379	X	47483043		0.870175	0	0.75614	0.000273778	TRUE	FALSE	0
cg04027004	X	107019426	TSC22D3	0.910526	0	0.759649	0.00024543	TRUE	FALSE	0
cg04027132	2	179265365	MIR548N	0.849123	0	0.840351	0	FALSE	FALSE	0
cg04028107	9	19127687	PLIN2;PLIN2	0.910526	0	0.892982	0	FALSE	FALSE	0
cg04029134	17	66728982		0.866667	0	0.882456	0	FALSE	FALSE	0
cg04029630	X	55478329	MAGEH1	0.910526	0	0.717544	0.000783412	TRUE	FALSE	0
cg04029664	X	117250962	KLHL13;KLHL13;KLHL13	0.84386	0	0.821053	1.21192e-05	TRUE	FALSE	0
cg04071440	6	29648275		0.838596	0	0.822807	1.006e-05	FALSE	FALSE	0
cg04072009	X	71351668	NHSL2;RGAG4;RGAG4	0.896491	0	0.833333	5.45502e-07	TRUE	TRUE	0
cg04073914	4	84461507	AGPAT9	0.901754	0	0.82807	4.73137e-06	TRUE	FALSE	0
cg04075675	X	149861694	MTMR1	0.905263	0	0.717544	0.000783412	FALSE	FALSE	0
cg04077732	19	21324849	ZNF431;ZNF431	0.861404	0	0.642105	0.00378473	FALSE	FALSE	0
cg04094482	X	73834489	RLIM;RLIM	0.852632	0	0.829825	3.21707e-06	TRUE	FALSE	0
cg04097312	10	82345955	SH2D4B;SH2D4B	0.859649	0	0.729825	0.000574995	FALSE	TRUE	0
cg04109990	9	12795679	LURAP1L;LURAP1L-AS1	0.87193	0	0.77193	0.000163189	FALSE	FALSE	0
cg04112845	2	172379619	CYBRD1;CYBRD1	0.864912	0	0.694737	0.00132804	FALSE	FALSE	0
cg04112889	16	18812833	ARL6IP1;ARL6IP1	0.857895	0	0.84386	0	FALSE	FALSE	0
cg04114637	17	16721012		0.870175	0	0.535088	0.0198211	FALSE	FALSE	0
cg04122461	1	44445537	B4GALT2;B4GALT2;B4GALT2	0.84386	0	0.780702	0.000118322	FALSE	FALSE	0
cg04128303	X	122318829	GRIA3;GRIA3	0.889474	0	0.852632	0	TRUE	FALSE	0
cg04129885	4	2439700		0.889474	0	0.468421	0.0447556	TRUE	FALSE	0
cg04132418	6	131148736	LOC285733	0.880702	0	0.840351	0	TRUE	FALSE	0
cg04136921	11	5626314	TRIM6;TRIM6;TRIM6;TRIM6;TRIM6-TRIM34	0.868421	0	0.645614	0.00355061	TRUE	FALSE	0
cg04149024	X	153656891	ATP6AP1	0.84386	0	0.67193	0.00214416	TRUE	FALSE	0
cg04166210	X	103087157	RAB9B;RAB9B	0.907018	0	0.835088	0	FALSE	FALSE	0
cg04177426	X	150863969		0.838596	0	0.749123	0.000337889	TRUE	FALSE	0
cg04184316	X	118987146	UPF3B;UPF3B	0.889474	0	0.822807	1.006e-05	FALSE	FALSE	0
cg04227007	19	37760583	LOC284412	0.845614	0	0.857895	0	FALSE	TRUE	0
cg04237662	11	117049512	SIDT2	0.845614	0	0.861404	0	FALSE	FALSE	0
cg04241572	X	53461213	HSD17B10;HSD17B10	0.850877	0	0.812281	2.48466e-05	FALSE	FALSE	0
cg04244433	13	27999369	GTF3A	0.840351	0	0.807018	3.46999e-05	FALSE	FALSE	0
cg04255858	X	119764062	C1GALT1C1;C1GALT1C1	0.842105	0	0.754386	0.00028885	FALSE	FALSE	0
cg04269301	5	176924051	PDLIM7;PDLIM7;PDLIM7	0.873684	0	0.761404	0.000232117	FALSE	FALSE	0
cg04271131	X	9433870	TBL1X;TBL1X;TBL1X;TBL1X	0.866667	0	0.821053	1.21192e-05	FALSE	FALSE	0
cg04283377	X	47420348	ARAF	0.864912	0	0.868421	0	FALSE	FALSE	0
cg04286558	2	131209589		0.849123	0	0.492982	0.0336806	FALSE	FALSE	0
cg04331561	4	167021679	TLL1	0.891228	0	0.908772	0	TRUE	FALSE	0
cg04334385	X	119620153		0.859649	0	0.75614	0.000273778	FALSE	FALSE	0
cg04337386	7	7222197	C1GALT1	0.847368	0	0.731579	0.000549219	FALSE	TRUE	0
cg04341767	X	49687028	CLCN5;CLCN5	0.877193	0	0.822807	1.006e-05	TRUE	FALSE	0
cg04348816	7	5461417	TNRC18	0.866667	0	0.754386	0.00028885	FALSE	FALSE	0
cg04351468	Y	9158941	RBMY1A3P	0.84386	0	0.696491	0.0012776	FALSE	TRUE	0
cg04368919	X	68048131	EFNB1	0.873684	0	0.805263	3.84027e-05	TRUE	FALSE	0
cg04373760	16	53404718		0.852632	0	0.724561	0.000658097	FALSE	TRUE	0
cg04375931	17	2207241	SMG6;SMG6;SRR	0.892982	0	0.768421	0.000184191	FALSE	TRUE	0
cg04392293	11	28399977		0.87193	0	0.882456	0	FALSE	FALSE	0
cg04397441	X	70753023	OGT;OGT;OGT;BCYRN1;OGT	0.889474	0	0.884211	0	FALSE	FALSE	0
cg04399443	9	99960676		0.908772	0	0.822807	1.006e-05	TRUE	FALSE	0
cg04402486	X	131352242	RAP2C	0.866667	0	0.780702	0.000118322	TRUE	FALSE	0
cg04407853	18	33878230	FHOD3	0.878947	0	0.854386	0	FALSE	FALSE	0
cg04410024	8	75896798	CRISPLD1	0.84386	0	0.614035	0.00615134	FALSE	TRUE	0
cg04415694	3	41143414		0.9	0	0.863158	0	FALSE	FALSE	0
cg04418355	6	32729174	HLA-DQB2	0.85614	0	0.684211	0.00166562	FALSE	FALSE	0
cg04425458	8	133492868	KCNQ3;KCNQ3	0.85614	0	0.501754	0.0302985	FALSE	FALSE	0
cg04425994	7	47760390		0.845614	0	0.710526	0.000927047	TRUE	FALSE	0
cg04431965	16	940230	LMF1	0.84386	0	0.580702	0.0104055	FALSE	TRUE	0
cg04438194	4	119512985		0.838596	0	0.812281	2.48466e-05	FALSE	TRUE	0
cg04440717	10	133938266	JAKMIP3	0.845614	0	0.847368	0	FALSE	FALSE	0
cg04441645	4	190332642		0.891228	0	0.72807	0.000601715	TRUE	FALSE	0
cg04461143	3	31494586		0.859649	0	0.817544	1.67023e-05	TRUE	FALSE	0
cg04467639	11	14495049	COPB1;COPB1;COPB1	0.854386	0	0.67193	0.00214416	TRUE	FALSE	0
cg04474375	X	137793820	FGF13;FGF13;FGF13;FGF13;FGF13;FGF13;FGF13	0.87193	0	0.826316	6.37252e-06	FALSE	FALSE	0
cg04475341	X	40330473		0.875439	0	0.887719	0	FALSE	FALSE	0
cg04476849	X	103173728	MIR1256	0.905263	0	0.735088	0.000500396	FALSE	FALSE	0
cg04480376	15	77896785		0.836842	0	0.775439	0.000143992	FALSE	FALSE	0
cg04481923	5	135416205	MIR886	0.864912	0	0.84386	0	TRUE	FALSE	0
cg04491396	X	107019182	TSC22D3	0.866667	0	0.764912	0.000207123	TRUE	FALSE	0
cg04495420	X	134568966		0.887719	0	0.840351	0	FALSE	TRUE	0
cg04499455	6	31356802		0.857895	0	0.875439	0	FALSE	FALSE	0
cg04504408	2	235156663		0.850877	0	0.645614	0.00355061	FALSE	FALSE	0
cg04508810	X	154299651	BRCC3;BRCC3;BRCC3;CMC4;MTCP1	0.877193	0	0.849123	0	FALSE	FALSE	0
cg04512759	X	102631253	NGFRAP1;NGFRAP1;NGFRAP1;NGFRAP1;NGFRAP1;NGFRAP1;NGFRAP1	0.863158	0	0.735088	0.000500396	TRUE	FALSE	0
cg04515987	Y	22960295		0.850877	0	0.778947	0.000126481	TRUE	FALSE	0
cg04516011	X	84189179	UBE2DNL	0.842105	0	0.835088	0	FALSE	FALSE	0
cg04526399	5	83017551	HAPLN1	0.847368	0	0.912281	0	FALSE	FALSE	0
cg04533380	17	40761691	FAM134C;TUBG1;FAM134C;TUBG1	0.864912	0	0.808772	3.12119e-05	FALSE	FALSE	0
cg04533591	X	118926128	RPL39	0.842105	0	0.817544	1.67023e-05	TRUE	FALSE	0
cg04534902	12	96388051	HAL;HAL;HAL	0.884211	0	0.903509	0	TRUE	FALSE	0
cg04539580	X	11782801	MSL3;MSL3;MSL3;MSL3;MSL3	0.87193	0	0.838596	0	FALSE	FALSE	0
cg04541675	19	50979561	FAM71E1;C19orf63;C19orf63	0.873684	0	0.824561	8.14662e-06	FALSE	FALSE	0
cg04564438	X	28605374	IL1RAPL1	0.85614	0	0.807018	3.46999e-05	FALSE	FALSE	0
cg04567170	5	150004395	SYNPO;SYNPO	0.864912	0	0.621053	0.0054697	FALSE	FALSE	0
cg04567952	2	200775554	C2orf69	0.861404	0	0.870175	0	FALSE	FALSE	0
cg04603630	22	39369327	APOBEC3A_B	0.850877	0	0.501754	0.0302985	TRUE	FALSE	0
cg04606582	15	22413307	OR4N3P	0.878947	0	0.792982	7.1125e-05	FALSE	FALSE	0
cg04628742	6	29973221	HLA-J;NCRNA00171	0.857895	0	0.842105	0	FALSE	FALSE	0
cg04665139	X	15353772	PIGA;PIGA	0.896491	0	0.750877	0.000320886	TRUE	FALSE	0
cg04672903	4	6675309	LOC93622	0.863158	0	0.85614	0	FALSE	TRUE	0
cg04683516	10	5047487	AKR1C2;AKR1C2;AKR1C2	0.905263	0	0.887719	0	TRUE	FALSE	0
cg04687357	11	118494765	PHLDB1;PHLDB1;PHLDB1	0.868421	0	0.84386	0	FALSE	FALSE	0
cg04691867	X	124339261		0.864912	0	0.707018	0.00100637	FALSE	FALSE	0
cg04716051	X	18443256	CDKL5	0.868421	0	0.798246	5.5546e-05	FALSE	FALSE	0
cg04721775	4	132647861		0.880702	0	0.833333	5.45502e-07	FALSE	TRUE	0
cg04739874	X	131157495	MST4;MST4;MST4	0.835088	0	0.805263	3.84027e-05	FALSE	FALSE	0
cg04740028	X	47383436		0.847368	0	0.831579	1.82368e-06	TRUE	FALSE	0
cg04744843	3	193311124	OPA1;OPA1;OPA1;OPA1;OPA1;OPA1;OPA1;OPA1;OPA1;OPA1;OPA1;OPA1;OPA1;OPA1;OPA1;OPA1	0.882456	0	0.659649	0.00272906	FALSE	FALSE	0
cg04746792	X	84258939	APOOL	0.857895	0	0.677193	0.00192701	FALSE	FALSE	0
cg04751886	X	53220515	KDM5C;KDM5C	0.836842	0	0.803509	4.23294e-05	FALSE	FALSE	0
cg04754076	X	152599461	ZNF275	0.868421	0	0.794737	6.56523e-05	TRUE	FALSE	0
cg04763286	X	128812388		0.85614	0	0.736842	0.000477298	FALSE	FALSE	0
cg04764455	4	109754441	COL25A1;COL25A1;COL25A1;COL25A1	0.836842	0	0.803509	4.23294e-05	TRUE	FALSE	0
cg04767208	12	53816268	AMHR2;AMHR2;AMHR2	0.835088	0	0.761404	0.000232117	FALSE	FALSE	0
cg04771154	X	48755502	PQBP1;PQBP1;TIMM17B;PQBP1;TIMM17B;PQBP1;PQBP1;PQBP1;PQBP1;PQBP1;PQBP1	0.847368	0	0.796491	6.04628e-05	FALSE	FALSE	0
cg04787237	X	153060546	IDH3G;IDH3G;SSR4	0.884211	0	0.72807	0.000601715	TRUE	FALSE	0
cg04790148	X	35937765	CXorf22	0.84386	0	0.792982	7.1125e-05	FALSE	FALSE	0
cg04793532	X	107683309	COL4A5;COL4A5;COL4A5;COL4A5;COL4A6;COL4A5;COL4A5	0.87193	0	0.847368	0	TRUE	FALSE	0
cg04801236	12	107487009	CRY1;CRY1	0.85614	0	0.442105	0.0595814	FALSE	FALSE	0
cg04820593	X	54383906	WNK3;WNK3	0.873684	0	0.868421	0	FALSE	FALSE	0
cg04824771	22	24372921	LOC391322	0.863158	0	0.784211	0.00010313	FALSE	TRUE	0
cg04828704	X	107070200	MID2;MID2	0.84386	0	0.773684	0.000153372	TRUE	FALSE	0
cg04828797	3	172468381	ECT2;ECT2;ECT2	0.884211	0	0.889474	0	FALSE	FALSE	0
cg04833646	19	10679720	CDKN2D;CDKN2D	0.835088	0	0.75614	0.000273778	FALSE	TRUE	0
cg04843821	10	33016632	C10orf68	0.9	0	0.873684	0	TRUE	FALSE	0
cg04852271	X	140787063	SPANXD;SPANXE	0.898246	0	0.845614	0	FALSE	FALSE	0
cg04861073	12	132939425		0.842105	0	0.908772	0	TRUE	FALSE	0
cg04861534	X	11776260	MSL3;MSL3;MSL3;MSL3;MSL3	0.905263	0	0.777193	0.000135032	TRUE	FALSE	0
cg04875162	X	90689826	PABPC5;PABPC5	0.835088	0	0.819298	1.4331e-05	FALSE	FALSE	0
cg04879387	16	16043101	ABCC1;ABCC1;ABCC1;ABCC1;ABCC1	0.907018	0	0.717544	0.000783412	FALSE	TRUE	0
cg04887076	19	55477653	NLRP2	0.908772	0	0.924561	2.17851e-06	FALSE	TRUE	0
cg04898932	22	35645717		0.840351	0	0.754386	0.00028885	FALSE	FALSE	0
cg04899361	7	1597412	TMEM184A	0.845614	0	0.847368	0	FALSE	TRUE	0
cg04899896	4	79860379	PAQR3;PAQR3	0.847368	0	0.84386	0	FALSE	FALSE	0
cg04918256	Y	15015514	DDX3Y;DDX3Y	0.863158	0	0.710526	0.000927047	TRUE	FALSE	0
cg04924696	X	23925746	CXorf58;APOO;APOO;CXorf58	0.85614	0	0.757895	0.000259311	FALSE	FALSE	0
cg04924736	X	101410888	BEX5;BEX5;BEX5	0.887719	0	0.764912	0.000207123	TRUE	FALSE	0
cg04932755	X	68047893	EFNB1	0.891228	0	0.691228	0.00143375	FALSE	FALSE	0
cg04967779	X	13688881		0.838596	0	0.785965	9.60713e-05	FALSE	FALSE	0
cg04971183	19	16132558	LINC00661	0.885965	0	0.785965	9.60713e-05	FALSE	FALSE	0
cg04980389	2	26728179	OTOF;OTOF	0.912281	0	0.833333	5.45502e-07	TRUE	FALSE	0
cg04998153	1	101823331	LINC01307	0.840351	0	0.940351	4.83569e-06	FALSE	FALSE	0
cg04998327	11	103453960		0.885965	0	0.838596	0	TRUE	FALSE	0
cg05007325	16	34741493		0.854386	0	0.777193	0.000135032	FALSE	FALSE	0
cg05008355	X	153095404	PDZD4;PDZD4;PDZD4;PDZD4;PDZD4;PDZD4	0.905263	0	0.77193	0.000163189	FALSE	FALSE	0
cg05023132	X	95939482	DIAPH2;DIAPH2	0.87193	0	0.842105	0	FALSE	FALSE	0
cg05023192	2	240965916	NDUFA10	0.85614	0	0.854386	0	TRUE	FALSE	0
cg05028071	X	48900948	TFE3;TFE3	0.875439	0	0.736842	0.000477298	FALSE	FALSE	0
cg05031484	X	41316942	NYX	0.854386	0	0.761404	0.000232117	FALSE	FALSE	0
cg05032903	X	99665948	PCDH19;PCDH19	0.896491	0	0.766667	0.000195408	TRUE	FALSE	0
cg05037630	15	68095017	MAP2K5;MAP2K5;MAP2K5	0.889474	0	0.794737	6.56523e-05	FALSE	FALSE	0
cg05037738	3	194220473		0.878947	0	0.847368	0	FALSE	FALSE	0
cg05045332	6	32012897	TNXB;TNXB	0.845614	0	0.640351	0.00390643	FALSE	FALSE	0
cg05047411	X	149009895	MAGEA8;MAGEA8;MAGEA8	0.861404	0	0.873684	0	FALSE	FALSE	0
cg05047811	X	152875939		0.882456	0	0.817544	1.67023e-05	TRUE	FALSE	0
cg05049545	X	18372696	SCML2	0.840351	0	0.726316	0.000629407	TRUE	FALSE	0
cg05049933	X	103357458	MCART6;ZCCHC18;ZCCHC18;ZCCHC18	0.903509	0	0.887719	0	TRUE	FALSE	0
cg05057452	16	214970	HBM	0.852632	0	0.612281	0.00633216	FALSE	TRUE	0
cg05057827	14	98670848		0.838596	0	0.538596	0.0189143	TRUE	FALSE	0
cg05062653	5	562341		0.870175	0	0.822807	1.006e-05	FALSE	FALSE	0
cg05064044	6	292385	DUSP22;DUSP22	0.901754	0	0.568421	0.0124753	FALSE	TRUE	0
cg05064925	X	107681469	COL4A6;COL4A6;COL4A6	0.861404	0	0.785965	9.60713e-05	TRUE	FALSE	0
cg05072636	X	64196566	ZC4H2;ZC4H2;ZC4H2;ZC4H2;ZC4H2	0.866667	0	0.768421	0.000184191	FALSE	FALSE	0
cg05073171	X	134232157	NCRNA00087	0.859649	0	0.785965	9.60713e-05	FALSE	FALSE	0
cg05074213	8	2200128		0.866667	0	0.852632	0	FALSE	FALSE	0
cg05074623	X	151999750	NSDHL;NSDHL;CETN2	0.887719	0	0.792982	7.1125e-05	TRUE	FALSE	0
cg05075991	14	89258917	EML5;EML5	0.896491	0	0.710526	0.000927047	FALSE	FALSE	0
cg05086798	X	23350313		0.870175	0	0.814035	2.19525e-05	TRUE	FALSE	0
cg05091873	X	150067687	CD99L2;CD99L2;CD99L2	0.863158	0	0.801754	4.64892e-05	TRUE	FALSE	0
cg05096434	X	106243404	MORC4;MORC4;MORC4;MORC4	0.857895	0	0.703509	0.00109104	FALSE	FALSE	0
cg05100479	X	113819290	HTR2C	0.854386	0	0.884211	0	FALSE	FALSE	0
cg05104048	15	79603279	TMED3	0.845614	0	0.645614	0.00355061	FALSE	FALSE	0
cg05105276	3	184782894		0.838596	0	0.552632	0.0156147	FALSE	FALSE	0
cg05106824	X	120181294	GLUD2	0.84386	0	0.845614	0	FALSE	FALSE	0
cg05109619	X	69509801	PDZD11;KIF4A	0.880702	0	0.740351	0.000433605	TRUE	FALSE	0
cg05116536	21	31621345		0.854386	0	0.807018	3.46999e-05	FALSE	FALSE	0
cg05130312	X	130930098	LOC286467	0.868421	0	0.773684	0.000153372	TRUE	FALSE	0
cg05134041	X	82763219	POU3F4	0.84386	0	0.840351	0	FALSE	FALSE	0
cg05137662	X	153461686	OPN1MW	0.912281	0	0.894737	0	FALSE	FALSE	0
cg05137809	10	80988604	ZMIZ1	0.901754	0	0.796491	6.04628e-05	FALSE	FALSE	0
cg05141017	5	148520542	ABLIM3;ABLIM3;ABLIM3;ABLIM3;ABLIM3	0.850877	0	0.703509	0.00109104	FALSE	FALSE	0
cg05152874	X	50557122	SHROOM4;SHROOM4	0.861404	0	0.710526	0.000927047	FALSE	FALSE	0
cg05171921	7	157917118	PTPRN2;PTPRN2;PTPRN2	0.852632	0	0.754386	0.00028885	FALSE	TRUE	0
cg05172693	X	119379153	CXorf42	0.849123	0	0.705263	0.00104802	FALSE	FALSE	0
cg05180335	X	102631298	NGFRAP1;NGFRAP1;NGFRAP1;NGFRAP1;NGFRAP1;NGFRAP1;NGFRAP1	0.845614	0	0.678947	0.00185874	TRUE	FALSE	0
cg05192472	X	106449657	NUP62CL;CXorf41;NUP62CL;CXorf41	0.885965	0	0.761404	0.000232117	FALSE	FALSE	0
cg05196231	X	40944772	USP9X;USP9X	0.836842	0	0.778947	0.000126481	FALSE	FALSE	0
cg05206294	X	118708375	UBE2A;UBE2A	0.861404	0	0.766667	0.000195408	FALSE	FALSE	0
cg05207724	X	152907912	DUSP9;DUSP9	0.877193	0	0.810526	2.79303e-05	TRUE	FALSE	0
cg05212419	X	63425250	FAM123B	0.901754	0	0.878947	0	FALSE	FALSE	0
cg05233863	7	130743581	FLJ43663;FLJ43663	0.889474	0	0.642105	0.00378473	FALSE	TRUE	0
cg05234568	11	5960015		0.868421	0	0.875439	0	FALSE	TRUE	0
cg05237609	X	46404607	ZNF674;LOC401588;ZNF674	0.863158	0	0.747368	0.000355578	FALSE	FALSE	0
cg05242815	X	25023562	ARX	0.847368	0	0.794737	6.56523e-05	TRUE	FALSE	0
cg05256967	3	81816600		0.898246	0	0.880702	0	FALSE	FALSE	0
cg05259868	X	150344204	GPR50	0.873684	0	0.857895	0	FALSE	FALSE	0
cg05270750	16	90143788	PRDM7	0.845614	0	0.854386	0	FALSE	TRUE	0
cg05272837	X	54071268	PHF8	0.854386	0	0.794737	6.56523e-05	FALSE	FALSE	0
cg05279330	13	26776254		0.85614	0	0.9	0	TRUE	FALSE	0
cg05285138	14	23616155	SLC7A8;SLC7A8;SLC7A8;SLC7A8;SLC7A8	0.863158	0	0.868421	0	FALSE	FALSE	0
cg05305760	X	70712563	INGX;BCYRN1	0.898246	0	0.907018	0	FALSE	FALSE	0
cg05313921	X	84189658	UBE2DNL	0.840351	0	0.847368	0	FALSE	FALSE	0
cg05345404	X	53468666		0.908772	0	0.692982	0.00138008	FALSE	FALSE	0
cg05363666	X	106872025	PRPS1	0.840351	0	0.733333	0.000524361	FALSE	FALSE	0
cg05364766	7	136832262		0.892982	0	0.901754	0	TRUE	FALSE	0
cg05377165	14	89628422	FOXN3;FOXN3	0.850877	0	0.840351	0	FALSE	FALSE	0
cg05379196	X	150151580	HMGB3	0.873684	0	0.736842	0.000477298	TRUE	FALSE	0
cg05383895	X	108976632	ACSL4;ACSL4	0.866667	0	0.717544	0.000783412	TRUE	FALSE	0
cg05385973	X	37430777	LANCL3;LANCL3	0.838596	0	0.819298	1.4331e-05	FALSE	FALSE	0
cg05392448	1	2266933	MORN1	0.835088	0	0.689474	0.0014891	TRUE	FALSE	0
cg05392989	X	48748398		0.847368	0	0.687719	0.00154617	FALSE	FALSE	0
cg05397816	X	117957786	ZCCHC12;ZCCHC12	0.887719	0	0.65614	0.00291815	TRUE	FALSE	0
cg05414241	X	51240059	NUDT11	0.885965	0	0.794737	6.56523e-05	FALSE	FALSE	0
cg05416337	18	49865270	DCC	0.866667	0	0.921053	1.50172e-06	TRUE	FALSE	0
cg05418779	X	138771271	MCF2	0.880702	0	0.845614	0	FALSE	FALSE	0
cg05419227	X	70752860	OGT;OGT;BCYRN1	0.836842	0	0.749123	0.000337889	FALSE	FALSE	0
cg05425577	X	54522221	FGD1;FGD1	0.892982	0	0.738596	0.000455042	TRUE	FALSE	0
cg05427163	X	48397938	TBC1D25	0.894737	0	0.882456	0	TRUE	FALSE	0
cg05432953	X	71536395		0.852632	0	0.870175	0	FALSE	FALSE	0
cg05435882	16	88311214		0.878947	0	0.852632	0	FALSE	FALSE	0
cg05444994	X	21392324	CNKSR2;CNKSR2;CNKSR2;CNKSR2	0.875439	0	0.782456	0.000110543	TRUE	FALSE	0
cg05445331	X	133119028	GPC3;GPC3;GPC3;GPC3	0.852632	0	0.687719	0.00154617	FALSE	FALSE	0
cg05450979	16	10855738	NUBP1	0.882456	0	0.824561	8.14662e-06	TRUE	FALSE	0
cg05464635	X	10628343	MID1;MID1	0.870175	0	0.903509	0	TRUE	FALSE	0
cg05467600	X	103499724	ESX1	0.889474	0	0.684211	0.00166562	FALSE	FALSE	0
cg05473257	10	135341443	CYP2E1	0.861404	0	0.759649	0.00024543	FALSE	FALSE	0
cg05474077	X	80457709	HMGN5;SH3BGRL	0.882456	0	0.768421	0.000184191	FALSE	FALSE	0
cg05477582	16	66600478	CMTM1;CMTM1;CMTM1;CMTM1;CMTM1;CMTM1;CMTM1;CMTM1	0.835088	0	0.84386	0	TRUE	FALSE	0
cg05519532	9	1989032		0.889474	0	0.754386	0.00028885	TRUE	FALSE	0
cg05522554	8	41625190	ANK1;ANK1;ANK1;ANK1;ANK1	0.850877	0	0.742105	0.000412963	FALSE	FALSE	0
cg05525888	2	131451228		0.896491	0	0.912281	0	FALSE	FALSE	0
cg05528533	6	35310264	PPARD;PPARD	0.836842	0	0.791228	7.68918e-05	FALSE	FALSE	0
cg05531986	X	41157834		0.842105	0	0.842105	0	FALSE	FALSE	0
cg05536840	X	24511755	PDK3;PDK3	0.857895	0	0.850877	0	FALSE	FALSE	0
cg05540617	16	3714372	TRAP1	0.861404	0	0.478947	0.0397056	FALSE	FALSE	0
cg05551025	X	110924355	ALG13;ALG13;ALG13;ALG13;ALG13;ALG13;ALG13;ALG13;ALG13;ALG13;ALG13;ALG13;ALG13;ALG13;ALG13;ALG13	0.894737	0	0.857895	0	FALSE	FALSE	0
cg05551578	X	133930791	FAM122B;FAM122B;FAM122B;FAM122B;FAM122C;FAM122B;FAM122B	0.866667	0	0.733333	0.000524361	TRUE	FALSE	0
cg05553214	21	33866820	EVA1C;EVA1C;EVA1C	0.891228	0	0.850877	0	FALSE	FALSE	0
cg05570109	2	39812572		0.849123	0	0.882456	0	TRUE	FALSE	0
cg05594230	X	70712403	INGX;BCYRN1	0.896491	0	0.914035	7.57378e-08	TRUE	FALSE	0
cg05599151	X	53111398	TSPYL2	0.898246	0	0.731579	0.000549219	FALSE	FALSE	0
cg05643303	12	54402714	HOXC8	0.905263	0	0.852632	0	FALSE	TRUE	0
cg05656210	5	141660565		0.896491	0	0.812281	2.48466e-05	TRUE	FALSE	0
cg05658928	18	82976		0.836842	0	0.677193	0.00192701	TRUE	FALSE	0
cg05669845	7	4303193	SDK1;SDK1	0.835088	0	0.8	5.08914e-05	FALSE	FALSE	0
cg05672967	6	169256475		0.882456	0	0.922807	1.84351e-06	FALSE	TRUE	0
cg05679489	X	148552714		0.864912	0	0.694737	0.00132804	FALSE	FALSE	0
cg05689315	X	51637585	MAGED1;MAGED1;MAGED1	0.859649	0	0.82807	4.73137e-06	TRUE	FALSE	0
cg05697969	19	590413	HCN2	0.836842	0	0.691228	0.00143375	FALSE	FALSE	0
cg05711300	Y	16368115		0.891228	0	0.773684	0.000153372	TRUE	FALSE	0
cg05721374	1	109619308	TAF13	0.885965	0	0.845614	0	FALSE	TRUE	0
cg05730108	13	99095003	FARP1	0.907018	0	0.521053	0.023804	TRUE	FALSE	0
cg05741225	10	133917303	JAKMIP3	0.838596	0	0.808772	3.12119e-05	FALSE	FALSE	0
cg05747459	X	21393306	CNKSR2;CNKSR2;CNKSR2;CNKSR2	0.868421	0	0.763158	0.000219354	FALSE	FALSE	0
cg05755935	X	139847955	LINC00632	0.859649	0	0.815789	1.92403e-05	FALSE	FALSE	0
cg05764570	6	32726692	HLA-DQB2	0.863158	0	0.894737	0	FALSE	FALSE	0
cg05777666	X	103499734	ESX1	0.863158	0	0.685965	0.00160499	FALSE	FALSE	0
cg05778226	17	400920		0.838596	0	0.824561	8.14662e-06	FALSE	FALSE	0
cg05779595	13	112836631		0.849123	0	0.770175	0.000173456	FALSE	FALSE	0
cg05785542	8	1278754		0.884211	0	0.794737	6.56523e-05	FALSE	FALSE	0
cg05788681	X	103499545	ESX1;ESX1	0.885965	0	0.791228	7.68918e-05	FALSE	FALSE	0
cg05799859	X	153744612	FAM3A;FAM3A;FAM3A;FAM3A;FAM3A	0.891228	0	0.724561	0.000658097	TRUE	FALSE	0
cg05802648	10	81283261		0.868421	0	0.805263	3.84027e-05	FALSE	FALSE	0
cg05803989	6	170529538		0.840351	0	0.64386	0.00366614	FALSE	TRUE	0
cg05804856	10	127715083	ADAM12;ADAM12	0.849123	0	0.782456	0.000110543	FALSE	FALSE	0
cg05806018	X	147582520	AFF2;AFF2;AFF2;AFF2;AFF2;AFF2;AFF2;AFF2;AFF2;AFF2	0.889474	0	0.742105	0.000412963	TRUE	FALSE	0
cg05808124	1	236514684		0.882456	0	0.887719	0	FALSE	TRUE	0
cg05827943	7	26241126	HNRNPA2B1;CBX3;CBX3;CBX3;HNRNPA2B1	0.84386	0	0.470175	0.0438809	FALSE	FALSE	0
cg05828606	17	45481057	EFCAB13;EFCAB13	0.863158	0	0.85614	0	TRUE	FALSE	0
cg05828839	12	133707206	ZNF10	0.884211	0	0.775439	0.000143992	FALSE	FALSE	0
cg05842986	X	48333972	FTSJ1;FTSJ1;FTSJ1	0.847368	0	0.824561	8.14662e-06	TRUE	FALSE	0
cg05843631	X	154275146	FUNDC2	0.847368	0	0.824561	8.14662e-06	FALSE	FALSE	0
cg05856797	X	18969058	PHKA2	0.905263	0	0.610526	0.00651729	FALSE	FALSE	0
cg05859153	X	106863448		0.889474	0	0.87193	0	FALSE	FALSE	0
cg05882265	22	43566559	TTLL12	0.849123	0	0.764912	0.000207123	TRUE	FALSE	0
cg05884886	X	133370915	CCDC160	0.905263	0	0.85614	0	FALSE	FALSE	0
cg05890457	8	1905131	ARHGEF10	0.85614	0	0.850877	0	TRUE	FALSE	0
cg05898072	X	132914128	GPC3;GPC3;GPC3;GPC3	0.836842	0	0.854386	0	FALSE	FALSE	0
cg05899258	X	34165079		0.908772	0	0.912281	0	FALSE	FALSE	0
cg05900567	19	37466940		0.892982	0	0.731579	0.000549219	TRUE	FALSE	0
cg05904344	13	113843426	PCID2;PCID2;PCID2;PCID2;PCID2	0.835088	0	0.833333	5.45502e-07	TRUE	FALSE	0
cg05905814	X	150151809	HMGB3;HMGB3	0.870175	0	0.761404	0.000232117	FALSE	FALSE	0
cg05914696	X	68114669		0.866667	0	0.838596	0	FALSE	FALSE	0
cg05918124	1	108735713	SLC25A24;SLC25A24	0.875439	0	0.742105	0.000412963	TRUE	FALSE	0
cg05935584	X	150151823	HMGB3;HMGB3	0.861404	0	0.75614	0.000273778	TRUE	FALSE	0
cg05940425	14	65240980	SPTB;SPTB	0.912281	0	0.885965	0	TRUE	FALSE	0
cg05947181	X	50557283	SHROOM4;SHROOM4	0.891228	0	0.74386	0.000393093	TRUE	FALSE	0
cg05953846	11	6654445	DCHS1	0.868421	0	0.831579	1.82368e-06	FALSE	FALSE	0
cg05957603	22	41252784	XPNPEP3;ST13	0.907018	0	0.601754	0.00751056	FALSE	TRUE	0
cg05961492	22	47459539	TBC1D22A;TBC1D22A;TBC1D22A;TBC1D22A;TBC1D22A	0.864912	0	0.719298	0.000750442	TRUE	FALSE	0
cg05965444	X	134049328	MOSPD1	0.878947	0	0.777193	0.000135032	TRUE	FALSE	0
cg05975021	X	11310708	ARHGAP6;AMELX;AMELX;AMELX;ARHGAP6	0.840351	0	0.845614	0	FALSE	FALSE	0
cg06002687	8	80783997		0.87193	0	0.915789	4.40065e-07	TRUE	FALSE	0
cg06002867	6	170449679		0.850877	0	0.812281	2.48466e-05	TRUE	FALSE	0
cg06010659	5	1634505	LOC728613	0.835088	0	0.677193	0.00192701	FALSE	TRUE	0
cg06012621	2	218296732	DIRC3	0.870175	0	0.901754	0	FALSE	FALSE	0
cg06013788	5	135355037		0.838596	0	0.787719	8.93533e-05	TRUE	FALSE	0
cg06016857	9	120571		0.877193	0	0.892982	0	FALSE	FALSE	0
cg06022838	X	153238133	TMEM187;TMEM187;HCFC1	0.861404	0	0.74386	0.000393093	FALSE	FALSE	0
cg06023066	22	17515637		0.835088	0	0.822807	1.006e-05	FALSE	FALSE	0
cg06025043	X	49132126	PPP1R3F;PPP1R3F	0.898246	0	0.887719	0	FALSE	FALSE	0
cg06048710	X	101906169	GPRASP1;GPRASP1;GPRASP1;GPRASP1;ARMCX5-GPRASP2	0.866667	0	0.810526	2.79303e-05	TRUE	FALSE	0
cg06049774	10	81892109	PLAC9	0.878947	0	0.547368	0.0167926	TRUE	FALSE	0
cg06055478	X	62974905	ARHGEF9;ARHGEF9	0.866667	0	0.803509	4.23294e-05	TRUE	FALSE	0
cg06068557	10	87515969	GRID1	0.836842	0	0.812281	2.48466e-05	FALSE	FALSE	0
cg06072560	X	100075379	CSTF2;CSTF2	0.847368	0	0.677193	0.00192701	FALSE	FALSE	0
cg06079963	X	24711994	POLA1	0.868421	0	0.750877	0.000320886	TRUE	FALSE	0
cg06083932	19	585281		0.898246	0	0.898246	0	TRUE	FALSE	0
cg06093412	X	47518594	LOC100133957;LOC100133957;UXT;UXT	0.903509	0	0.778947	0.000126481	FALSE	FALSE	0
cg06102971	X	17878442	RAI2	0.907018	0	0.835088	0	TRUE	FALSE	0
cg06105925	5	102898545	NUDT12;NUDT12	0.857895	0	0.770175	0.000173456	FALSE	FALSE	0
cg06112835	11	68658793	MRPL21;MRPL21	0.840351	0	0.884211	0	FALSE	TRUE	0
cg06115741	20	33292138	TP53INP2	0.847368	0	0.742105	0.000412963	FALSE	FALSE	0
cg06117243	2	95536341	TEKT4	0.838596	0	0.791228	7.68918e-05	FALSE	FALSE	0
cg06124711	X	153640000	TAZ;DNASE1L1;DNASE1L1;TAZ;TAZ;TAZ;DNASE1L1;TAZ;TAZ;TAZ;TAZ;TAZ	0.9	0	0.787719	8.93533e-05	FALSE	FALSE	0
cg06127531	X	131770567	HS6ST2;HS6ST2	0.840351	0	0.842105	0	FALSE	FALSE	0
cg06134910	10	26730561	APBB1IP	0.880702	0	0.640351	0.00390643	TRUE	FALSE	0
cg06139288	X	11683125	ARHGAP6;ARHGAP6;ARHGAP6;ARHGAP6	0.873684	0	0.752632	0.000304546	TRUE	FALSE	0
cg06140460	X	48828397	KCND1	0.850877	0	0.757895	0.000259311	TRUE	FALSE	0
cg06143315	2	242950311		0.907018	0	0.801754	4.64892e-05	FALSE	FALSE	0
cg06144825	X	80457687	HMGN5;SH3BGRL;SH3BGRL	0.861404	0	0.808772	3.12119e-05	FALSE	FALSE	0
cg06144999	X	11129626	HCCS;HCCS;HCCS	0.9	0	0.885965	0	TRUE	FALSE	0
cg06147294	X	18669872	RS1;CDKL5;CDKL5	0.863158	0	0.822807	1.006e-05	FALSE	FALSE	0
cg06149454	X	149533026		0.875439	0	0.807018	3.46999e-05	TRUE	FALSE	0
cg06156260	1	25292412	RUNX3	0.905263	0	0.849123	0	FALSE	TRUE	0
cg06158088	X	47518504	LOC100133957;LOC100133957;UXT;UXT;UXT	0.882456	0	0.717544	0.000783412	TRUE	FALSE	0
cg06159667	X	103268258	H2BFWT;MIR1256	0.840351	0	0.854386	0	FALSE	FALSE	0
cg06161952	18	45379593	SMAD2;SMAD2;SMAD2	0.870175	0	0.731579	0.000549219	TRUE	FALSE	0
cg06174815	X	147582133	AFF2;AFF2;AFF2;AFF2;AFF2	0.840351	0	0.792982	7.1125e-05	FALSE	FALSE	0
cg06190216	X	152771994	BGN	0.842105	0	0.833333	5.45502e-07	FALSE	FALSE	0
cg06218627	9	123555583	LOC402377;FBXW2	0.868421	0	0.592982	0.00862403	FALSE	FALSE	0
cg06227268	Y	10008967		0.850877	0	0.898246	0	FALSE	FALSE	0
cg06252876	X	129299948	AIFM1;AIFM1;AIFM1;AIFM1	0.84386	0	0.736842	0.000477298	FALSE	FALSE	0
cg06266461	X	153719192	SLC10A3;SLC10A3;SLC10A3	0.847368	0	0.749123	0.000337889	TRUE	FALSE	0
cg06269080	X	19003031	PHKA2	0.861404	0	0.822807	1.006e-05	TRUE	FALSE	0
cg06270147	10	73078971	SLC29A3	0.875439	0	0.810526	2.79303e-05	FALSE	FALSE	0
cg06277838	X	73641370	SLC16A2	0.880702	0	0.805263	3.84027e-05	TRUE	FALSE	0
cg06279067	1	116307845	CASQ2	0.854386	0	0.833333	5.45502e-07	TRUE	FALSE	0
cg06282811	22	49012297	FAM19A5;FAM19A5	0.864912	0	0.696491	0.0012776	FALSE	FALSE	0
cg06288403	X	130037593	ENOX2;ENOX2;ENOX2	0.878947	0	0.868421	0	TRUE	FALSE	0
cg06295137	7	92102186		0.898246	0	0.898246	0	FALSE	FALSE	0
cg06295223	16	90143751	PRDM7	0.861404	0	0.82807	4.73137e-06	FALSE	TRUE	0
cg06295352	X	130037150	ENOX2;ENOX2;ENOX2;ENOX2	0.884211	0	0.745614	0.000373971	TRUE	FALSE	0
cg06300944	X	153141270	L1CAM;L1CAM;L1CAM	0.903509	0	0.754386	0.00028885	FALSE	FALSE	0
cg06318935	4	8253470		0.891228	0	0.778947	0.000126481	TRUE	FALSE	0
cg06334238	X	153284899	IRAK1;IRAK1;IRAK1	0.852632	0	0.698246	0.00122872	TRUE	FALSE	0
cg06341336	X	55026590	APEX2	0.835088	0	0.710526	0.000927047	TRUE	FALSE	0
cg06344265	11	120530973	GRIK4	0.868421	0	0.759649	0.00024543	TRUE	FALSE	0
cg06354054	12	125440391	DHX37	0.859649	0	0.805263	3.84027e-05	TRUE	FALSE	0
cg06358300	9	84302344	TLE1	0.85614	0	0.726316	0.000629407	FALSE	FALSE	0
cg06359500	X	102943034	MORF4L2;MORF4L2;MORF4L2;MORF4L2;MORF4L2;MORF4L2;MORF4L2;MORF4L2;MORF4L2-AS1;MORF4L2;MORF4L2;MORF4L2;MORF4L2;MORF4L2;MORF4L2;MORF4L2;MORF4L2;MORF4L2;MORF4L2;MORF4L2;MORF4L2;MORF4L2;MORF4L2;MORF4L2;MORF4L2	0.877193	0	0.847368	0	FALSE	FALSE	0
cg06360820	2	242988706		0.850877	0	0.849123	0	TRUE	TRUE	0
cg06362582	7	37286864	ELMO1;ELMO1;ELMO1	0.873684	0	0.910526	0	FALSE	FALSE	0
cg06362895	17	78578898	RPTOR;RPTOR	0.912281	0	0.959649	7.08034e-06	TRUE	FALSE	0
cg06379095	19	7735239	RETN	0.891228	0	0.812281	2.48466e-05	FALSE	FALSE	0
cg06380338	6	27861363	HIST1H2AM;HIST1H2BO	0.835088	0	0.864912	0	FALSE	FALSE	0
cg06403392	X	118739909	NKRF;NKRF	0.891228	0	0.833333	5.45502e-07	FALSE	FALSE	0
cg06403901	14	51011528	ATL1	0.884211	0	0.754386	0.00028885	TRUE	FALSE	0
cg06407043	12	8403616		0.835088	0	0.829825	3.21707e-06	FALSE	FALSE	0
cg06407366	X	13707511	RAB9A	0.885965	0	0.768421	0.000184191	FALSE	FALSE	0
cg06408185	X	18443714	CDKL5	0.850877	0	0.72807	0.000601715	FALSE	FALSE	0
cg06408301	X	37208607	PRRG1;PRRG1;PRRG1;PRRG1	0.866667	0	0.705263	0.00104802	FALSE	FALSE	0
cg06428288	X	15511530	PIR;PIR	0.896491	0	0.726316	0.000629407	FALSE	FALSE	0
cg06437931	1	38180356		0.861404	0	0.868421	0	TRUE	FALSE	0
cg06452842	X	39633110		0.838596	0	0.831579	1.82368e-06	FALSE	FALSE	0
cg06464078	16	57541087		0.891228	0	0.896491	0	TRUE	FALSE	0
cg06475150	X	48937814	WDR45;WDR45	0.868421	0	0.750877	0.000320886	TRUE	FALSE	0
cg06476903	19	38806779	YIF1B;YIF1B;YIF1B;YIF1B;YIF1B;YIF1B	0.863158	0	0.777193	0.000135032	FALSE	TRUE	0
cg06478886	5	135416029		0.875439	0	0.884211	0	FALSE	FALSE	0
cg06481993	4	120298494		0.861404	0	0.735088	0.000500396	FALSE	FALSE	0
cg06491590	7	4855406	RADIL	0.861404	0	0.878947	0	FALSE	FALSE	0
cg06494135	16	85968843		0.905263	0	0.926316	2.50634e-06	TRUE	FALSE	0
cg06495764	16	3507895	NAA60;NAA60;NAA60	0.884211	0	0.657895	0.00282231	FALSE	FALSE	0
cg06506080	X	70503908	NONO;NONO;BCYRN1;NONO;NONO	0.9	0	0.735088	0.000500396	FALSE	FALSE	0
cg06506461	10	71112319	HK1;HK1;HK1;HK1;HK1	0.864912	0	0.682456	0.00172809	FALSE	FALSE	0
cg06513015	7	64459246	ERV3-1	0.842105	0	0.812281	2.48466e-05	FALSE	FALSE	0
cg06520095	16	66458043		0.864912	0	0.840351	0	TRUE	FALSE	0
cg06523340	1	231376895	GNPAT;C1orf131;C1orf131	0.845614	0	0.638596	0.00403132	FALSE	FALSE	0
cg06535290	16	85716163	GINS2	0.857895	0	0.849123	0	FALSE	FALSE	0
cg06536614	5	135416381	MIR886	0.882456	0	0.854386	0	FALSE	FALSE	0
cg06548827	14	44207574		0.889474	0	0.812281	2.48466e-05	TRUE	FALSE	0
cg06549249	X	129040144	UTP14A;UTP14A;UTP14A;UTP14A	0.892982	0	0.796491	6.04628e-05	TRUE	FALSE	0
cg06558166	X	132549003	GPC4;GPC4	0.850877	0	0.773684	0.000153372	TRUE	FALSE	0
cg06558623	16	89946397	TCF25	0.836842	0	0.821053	1.21192e-05	FALSE	TRUE	0
cg06560300	5	1278791	TERT;TERT	0.878947	0	0.489474	0.0351142	FALSE	FALSE	0
cg06562718	8	1789169	ARHGEF10	0.882456	0	0.805263	3.84027e-05	FALSE	FALSE	0
cg06563713	18	11950917		0.852632	0	0.470175	0.0438809	FALSE	TRUE	0
cg06574138	X	55041385	ALAS2;ALAS2;ALAS2	0.875439	0	0.878947	0	FALSE	FALSE	0
cg06583446	X	55517086	USP51	0.885965	0	0.884211	0	FALSE	FALSE	0
cg06587797	10	94773	TUBB8;TUBB8	0.875439	0	0.694737	0.00132804	FALSE	FALSE	0
cg06620254	X	70503046	NONO;NONO;NONO;NONO;BCYRN1;NONO;NONO;NONO;NONO	0.861404	0	0.763158	0.000219354	TRUE	FALSE	0
cg06625599	X	135849602	ARHGEF6;ARHGEF6	0.857895	0	0.789474	8.29641e-05	TRUE	FALSE	0
cg06628622	X	34960829	FAM47B	0.877193	0	0.877193	0	FALSE	FALSE	0
cg06630839	X	16964684	REPS2;REPS2	0.903509	0	0.866667	0	FALSE	FALSE	0
cg06636270	Y	9173300	TTTY20	0.845614	0	0.692982	0.00138008	FALSE	TRUE	0
cg06643849	19	57742421	AURKC;AURKC;AURKC;AURKC;AURKC	0.838596	0	0.835088	0	FALSE	TRUE	0
cg06649034	X	53349902	IQSEC2	0.84386	0	0.589474	0.00910547	FALSE	FALSE	0
cg06650546	X	136633004		0.857895	0	0.749123	0.000337889	FALSE	FALSE	0
cg06650847	X	63004884		0.877193	0	0.850877	0	FALSE	FALSE	0
cg06651459	X	13074305		0.838596	0	0.785965	9.60713e-05	FALSE	FALSE	0
cg06657741	X	135067456	SLC9A6;SLC9A6	0.85614	0	0.729825	0.000574995	FALSE	FALSE	0
cg06666117	X	63409514	FAM123B	0.87193	0	0.87193	0	FALSE	FALSE	0
cg06671139	15	73075935	ADPGK;ADPGK;ADPGK	0.847368	0	0.547368	0.0167926	FALSE	FALSE	0
cg06700462	X	19002006	PHKA2	0.87193	0	0.729825	0.000574995	FALSE	FALSE	0
cg06704717	X	73640484	SLC16A2	0.859649	0	0.659649	0.00272906	TRUE	FALSE	0
cg06710937	13	23489940		0.884211	0	0.891228	0	FALSE	FALSE	0
cg06711831	18	18821913	GREB1L	0.864912	0	0.805263	3.84027e-05	FALSE	FALSE	0
cg06721546	5	1594808	SDHAP3	0.887719	0	0.840351	0	FALSE	TRUE	0
cg06730782	X	11627107	ARHGAP6;ARHGAP6;ARHGAP6	0.877193	0	0.819298	1.4331e-05	FALSE	FALSE	0
cg06731599	X	40440704	ATP6AP2	0.850877	0	0.824561	8.14662e-06	TRUE	FALSE	0
cg06734027	X	129474007	SLC25A14;SLC25A14;SLC25A14;SLC25A14;SLC25A14	0.875439	0	0.708772	0.000966054	TRUE	FALSE	0
cg06737250	2	201042953		0.849123	0	0.84386	0	TRUE	FALSE	0
cg06737463	X	128783412	APLN	0.835088	0	0.864912	0	TRUE	FALSE	0
cg06758591	1	177140203	FAM5B	0.905263	0	0.835088	0	FALSE	FALSE	0
cg06762527	X	154033810	MPP1;MPP1;MPP1;MPP1	0.903509	0	0.761404	0.000232117	TRUE	FALSE	0
cg06775967	X	16995887	REPS2;REPS2	0.845614	0	0.819298	1.4331e-05	FALSE	FALSE	0
cg06783548	X	47479436	SYN1;SYN1	0.850877	0	0.680702	0.00179245	FALSE	FALSE	0
cg06795995	5	56204613	SETD9;SETD9	0.852632	0	0.77193	0.000163189	FALSE	FALSE	0
cg06796116	12	6196183	VWF	0.868421	0	0.796491	6.04628e-05	TRUE	FALSE	0
cg06805513	X	73641955	SLC16A2	0.877193	0	0.657895	0.00282231	TRUE	FALSE	0
cg06808227	14	105710500	BRF1;BRF1	0.838596	0	0.807018	3.46999e-05	FALSE	FALSE	0
cg06809923	6	169093117		0.884211	0	0.903509	0	TRUE	FALSE	0
cg06817276	20	56468039		0.835088	0	0.757895	0.000259311	FALSE	FALSE	0
cg06818142	X	100603949	TIMM8A;TIMM8A;TIMM8A	0.877193	0	0.87193	0	TRUE	FALSE	0
cg06818555	X	20287610		0.891228	0	0.908772	0	FALSE	FALSE	0
cg06821828	14	93698216		0.836842	0	0.829825	3.21707e-06	FALSE	FALSE	0
cg06831000	X	144712901		0.849123	0	0.796491	6.04628e-05	FALSE	FALSE	0
cg06834235	X	48334621	FTSJ1;FTSJ1;FTSJ1;FTSJ1	0.863158	0	0.775439	0.000143992	TRUE	FALSE	0
cg06844209	11	66629644	PC;PC;PC	0.878947	0	0.494737	0.0329814	FALSE	FALSE	0
cg06868414	18	56746125		0.875439	0	0.892982	0	TRUE	FALSE	0
cg06889571	10	1416791	ADARB2	0.885965	0	0.780702	0.000118322	FALSE	TRUE	0
cg06895515	X	47050149	UBA1	0.878947	0	0.819298	1.4331e-05	FALSE	FALSE	0
cg06899582	X	129402809	ZNF280C;ZNF280C	0.85614	0	0.77193	0.000163189	FALSE	FALSE	0
cg06900776	X	100878107	ARMCX3;ARMCX3;ARMCX3	0.847368	0	0.761404	0.000232117	FALSE	FALSE	0
cg06902235	19	53139159	ZNF83;ZNF83;ZNF83;ZNF83;ZNF83;ZNF83;ZNF83;ZNF83	0.901754	0	0.880702	0	FALSE	FALSE	0
cg06902849	X	119709690	CUL4B	0.847368	0	0.863158	0	FALSE	FALSE	0
cg06902858	X	62975487	ARHGEF9;ARHGEF9;ARHGEF9	0.87193	0	0.821053	1.21192e-05	FALSE	FALSE	0
cg06921685	X	119005865	NDUFA1;RNF113A;NDUFA1	0.896491	0	0.821053	1.21192e-05	FALSE	FALSE	0
cg06944050	X	118109068	LONRF3;LONRF3	0.845614	0	0.812281	2.48466e-05	FALSE	FALSE	0
cg06960187	6	36164657	BRPF3;BRPF3	0.885965	0	0.884211	0	FALSE	FALSE	0
cg06964654	X	139590383		0.859649	0	0.77193	0.000163189	TRUE	FALSE	0
cg06965169	10	1209379	NCRNA00200	0.885965	0	0.826316	6.37252e-06	FALSE	FALSE	0
cg06967228	X	68525725		0.838596	0	0.807018	3.46999e-05	FALSE	FALSE	0
cg06972843	6	143188910	HIVEP2	0.87193	0	0.847368	0	TRUE	FALSE	0
cg06980881	X	100673431	ARMCX4	0.845614	0	0.777193	0.000135032	FALSE	FALSE	0
cg06981242	X	138287529	FGF13;FGF13;FGF13	0.84386	0	0.673684	0.00206967	TRUE	FALSE	0
cg07019225	16	86796319		0.863158	0	0.864912	0	TRUE	FALSE	0
cg07023501	7	155948572		0.891228	0	0.924561	2.17851e-06	FALSE	FALSE	0
cg07033961	5	760251		0.85614	0	0.612281	0.00633216	FALSE	FALSE	0
cg07037055	13	97499552		0.868421	0	0.822807	1.006e-05	TRUE	FALSE	0
cg07038409	X	47509941	ELK1;ELK1;ELK1;ELK1	0.880702	0	0.835088	0	FALSE	FALSE	0
cg07040661	11	1079219	MUC2	0.852632	0	0.868421	0	TRUE	FALSE	0
cg07051162	X	30671305	GK;GK;GK	0.864912	0	0.74386	0.000393093	FALSE	FALSE	0
cg07056550	X	71459039	ERCC6L;PIN4	0.84386	0	0.750877	0.000320886	FALSE	FALSE	0
cg07057532	22	49801164		0.880702	0	0.842105	0	FALSE	FALSE	0
cg07061359	1	145303926	NBPF10;NBPF10;NBPF25P;NBPF25P;NBPF20;NBPF9;NBPF10;NBPF10	0.889474	0	0.791228	7.68918e-05	FALSE	FALSE	0
cg07063559	7	64043012	LOC641746	0.845614	0	0.880702	0	FALSE	FALSE	0
cg07066496	10	71729008		0.857895	0	0.75614	0.000273778	TRUE	FALSE	0
cg07079860	6	3094314	RIPK1	0.852632	0	0.764912	0.000207123	FALSE	FALSE	0
cg07086565	X	153236942	TMEM187;HCFC1	0.877193	0	0.659649	0.00272906	FALSE	FALSE	0
cg07089242	X	149106617	LOC100272228;CXorf40B;CXorf40B	0.896491	0	0.763158	0.000219354	TRUE	FALSE	0
cg07098277	X	106361852	RBM41;RBM41	0.85614	0	0.884211	0	FALSE	FALSE	0
cg07099245	X	39954231	BCOR;BCOR;BCOR;BCOR	0.875439	0	0.924561	2.17851e-06	FALSE	FALSE	0
cg07099606	12	133051136		0.868421	0	0.77193	0.000163189	FALSE	TRUE	0
cg07103917	11	20385628	HTATIP2;HTATIP2;HTATIP2;HTATIP2;HTATIP2;HTATIP2	0.905263	0	0.685965	0.00160499	FALSE	FALSE	0
cg07113474	2	176867125	KIAA1715;KIAA1715;KIAA1715;KIAA1715;KIAA1715;KIAA1715	0.866667	0	0.647368	0.00343807	FALSE	FALSE	0
cg07115537	X	37404647		0.892982	0	0.892982	0	FALSE	FALSE	0
cg07118054	X	72062474		0.836842	0	0.807018	3.46999e-05	FALSE	FALSE	0
cg07126775	9	109609554		0.835088	0	0.798246	5.5546e-05	TRUE	FALSE	0
cg07134666	6	29648400		0.877193	0	0.912281	0	TRUE	FALSE	0
cg07136610	X	53713793	HUWE1	0.859649	0	0.736842	0.000477298	FALSE	FALSE	0
cg07144177	6	8081020	EEF1E1-BLOC1S5;EEF1E1;EEF1E1	0.864912	0	0.463158	0.0474618	TRUE	FALSE	0
cg07157830	1	236228741	NID1	0.835088	0	0.745614	0.000373971	FALSE	FALSE	0
cg07167981	X	44732352	KDM6A	0.849123	0	0.74386	0.000393093	FALSE	FALSE	0
cg07176146	1	35325364	C1orf212;C1orf212;C1orf212;C1orf212	0.849123	0	0.626316	0.00500009	FALSE	FALSE	0
cg07180121	X	136134878		0.836842	0	0.784211	0.00010313	FALSE	FALSE	0
cg07198345	X	65382828	HEPH;HEPH;HEPH	0.838596	0	0.778947	0.000126481	FALSE	FALSE	0
cg07202869	5	171723771		0.87193	0	0.75614	0.000273778	FALSE	FALSE	0
cg07210229	16	88609890		0.908772	0	0.761404	0.000232117	TRUE	FALSE	0
cg07210774	X	119764206	C1GALT1C1;C1GALT1C1	0.859649	0	0.840351	0	TRUE	FALSE	0
cg07211915	X	19533544	MAP3K15	0.896491	0	0.785965	9.60713e-05	TRUE	FALSE	0
cg07215528	X	153775517	G6PD;G6PD;IKBKG;IKBKG;IKBKG;IKBKG	0.884211	0	0.738596	0.000455042	TRUE	FALSE	0
cg07216619	15	27035245		0.838596	0	0.885965	0	TRUE	FALSE	0
cg07223935	17	85413	RPH3AL	0.870175	0	0.803509	4.23294e-05	FALSE	FALSE	0
cg07234876	8	600039		0.907018	0	0.729825	0.000574995	FALSE	TRUE	0
cg07249765	7	4244643	SDK1;SDK1	0.85614	0	0.75614	0.000273778	TRUE	FALSE	0
cg07256221	X	118533106	SLC25A43	0.84386	0	0.808772	3.12119e-05	TRUE	FALSE	0
cg07262858	X	72223384	PABPC1L2B-AS1;PABPC1L2B;PABPC1L2B	0.861404	0	0.814035	2.19525e-05	FALSE	FALSE	0
cg07267946	X	131169014	STK26;STK26;STK26	0.838596	0	0.836842	0	FALSE	FALSE	0
cg07272831	5	68389996	SLC30A5;SLC30A5;SLC30A5;SLC30A5	0.889474	0	0.701754	0.00113548	FALSE	FALSE	0
cg07299305	10	38691787	CDC10L	0.866667	0	0.461404	0.0483916	FALSE	TRUE	0
cg07301957	X	129040087	UTP14A;UTP14A	0.907018	0	0.754386	0.00028885	TRUE	FALSE	0
cg07307460	22	21899163		0.910526	0	0.898246	0	FALSE	FALSE	0
cg07318999	X	100742903	ARMCX4	0.887719	0	0.84386	0	TRUE	FALSE	0
cg07329076	X	49067628	CACNA1F;CACNA1F;CACNA1F	0.863158	0	0.842105	0	FALSE	FALSE	0
cg07330723	X	138287232	FGF13;FGF13;FGF13	0.889474	0	0.735088	0.000500396	FALSE	FALSE	0
cg07334926	13	66583583		0.845614	0	0.780702	0.000118322	FALSE	FALSE	0
cg07342016	X	129306129	RAB33A	0.875439	0	0.849123	0	TRUE	FALSE	0
cg07366871	7	95313466		0.835088	0	0.714035	0.000852816	FALSE	FALSE	0
cg07376089	16	56966034	HERPUD1;HERPUD1;HERPUD1;HERPUD1;HERPUD1;HERPUD1	0.868421	0	0.607018	0.00690084	FALSE	FALSE	0
cg07377151	2	27851474	GPN1;GPN1;CCDC121;CCDC121;GPN1;GPN1;GPN1	0.87193	0	0.866667	0	FALSE	FALSE	0
cg07381502	X	40440191	ATP6AP2	0.873684	0	0.868421	0	FALSE	FALSE	0
cg07384655	6	143421772	AIG1;AIG1;AIG1;AIG1	0.907018	0	0.814035	2.19525e-05	FALSE	FALSE	0
cg07385090	16	78133557	WWOX;WWOX;WWOX;WWOX;WWOX;WWOX;WWOX;WWOX	0.838596	0	0.863158	0	FALSE	FALSE	0
cg07386410	X	55515751	USP51	0.877193	0	0.838596	0	TRUE	FALSE	0
cg07390522	X	8701393	ANOS1	0.847368	0	0.801754	4.64892e-05	FALSE	FALSE	0
cg07409656	13	78272378	SLAIN1	0.901754	0	0.663158	0.0025501	FALSE	FALSE	0
cg07419680	X	134429972	ZNF75D	0.859649	0	0.901754	0	FALSE	FALSE	0
cg07446674	X	135333561	MAP7D3;MAP7D3	0.861404	0	0.794737	6.56523e-05	TRUE	FALSE	0
cg07456585	14	74704714	VSX2	0.873684	0	0.878947	0	TRUE	FALSE	0
cg07459089	12	69235491	MDM2;MDM2;MDM2;MDM2;MDM2	0.85614	0	0.798246	5.5546e-05	FALSE	FALSE	0
cg07462256	X	68725088	FAM155B;FAM155B	0.877193	0	0.859649	0	TRUE	FALSE	0
cg07463743	X	39863342		0.842105	0	0.835088	0	FALSE	FALSE	0
cg07466166	X	77395088	TAF9B	0.910526	0	0.8	5.08914e-05	FALSE	FALSE	0
cg07482223	6	30899233	SFTA2	0.892982	0	0.877193	0	TRUE	FALSE	0
cg07483503	2	37965798		0.838596	0	0.868421	0	FALSE	FALSE	0
cg07484678	1	227103412		0.905263	0	0.838596	0	TRUE	FALSE	0
cg07495405	18	34325827	FHOD3	0.842105	0	0.866667	0	TRUE	FALSE	0
cg07500406	X	6145355	NLGN4X;NLGN4X;NLGN4X;NLGN4X	0.861404	0	0.766667	0.000195408	FALSE	FALSE	0
cg07511789	X	53122617	KANTR	0.885965	0	0.764912	0.000207123	FALSE	FALSE	0
cg07515362	X	130838832	FIRRE	0.84386	0	0.812281	2.48466e-05	TRUE	FALSE	0
cg07519908	X	18443723	CDKL5	0.850877	0	0.701754	0.00113548	FALSE	FALSE	0
cg07537133	20	59965634	CDH4	0.840351	0	0.754386	0.00028885	FALSE	FALSE	0
cg07550819	12	1482931	ERC1;ERC1;ERC1;ERC1;ERC1	0.842105	0	0.685965	0.00160499	FALSE	TRUE	0
cg07553115	X	107976167	IRS4	0.892982	0	0.814035	2.19525e-05	TRUE	FALSE	0
cg07557024	2	3663715	COLEC11;COLEC11	0.880702	0	0.794737	6.56523e-05	FALSE	TRUE	0
cg07576098	3	185689027		0.877193	0	0.714035	0.000852816	FALSE	TRUE	0
cg07576413	2	87934148		0.838596	0	0.849123	0	FALSE	FALSE	0
cg07579618	X	109561369	AMMECR1;AMMECR1;AMMECR1;AMMECR1;AMMECR1	0.840351	0	0.72807	0.000601715	FALSE	FALSE	0
cg07582070	6	75946061		0.850877	0	0.810526	2.79303e-05	FALSE	FALSE	0
cg07590102	X	18460454	CDKL5;CDKL5	0.854386	0	0.764912	0.000207123	FALSE	FALSE	0
cg07594244	X	24330930	SUPT20HL2	0.849123	0	0.814035	2.19525e-05	FALSE	FALSE	0
cg07598058	X	50897593	LINC01284	0.859649	0	0.829825	3.21707e-06	FALSE	FALSE	0
cg07599136	5	415885	AHRR	0.842105	0	0.821053	1.21192e-05	FALSE	TRUE	0
cg07605620	19	21512141	ZNF708;ZNF708	0.849123	0	0.74386	0.000393093	FALSE	FALSE	0
cg07607269	13	24912749		0.878947	0	0.854386	0	FALSE	TRUE	0
cg07609466	13	24893992	C1QTNF9;C1QTNF9;C1QTNF9	0.891228	0	0.901754	0	FALSE	FALSE	0
cg07615111	13	114965537		0.882456	0	0.840351	0	FALSE	FALSE	0
cg07629209	X	152599446	ZNF275	0.884211	0	0.705263	0.00104802	FALSE	FALSE	0
cg07629996	X	17673876	NHS;NHS	0.859649	0	0.892982	0	TRUE	FALSE	0
cg07646083	2	65640057	SPRED2	0.868421	0	0.866667	0	TRUE	FALSE	0
cg07647405	4	54220546	SCFD2	0.898246	0	0.657895	0.00282231	FALSE	TRUE	0
cg07653699	X	138286295	FGF13;FGF13;FGF13	0.873684	0	0.784211	0.00010313	FALSE	FALSE	0
cg07653885	17	131827	RPH3AL;RPH3AL;RPH3AL;RPH3AL	0.889474	0	0.907018	0	TRUE	FALSE	0
cg07659240	X	149531594		0.847368	0	0.789474	8.29641e-05	FALSE	FALSE	0
cg07662864	8	6470040	MCPH1	0.842105	0	0.754386	0.00028885	FALSE	FALSE	0
cg07674503	X	131352282	RAP2C	0.907018	0	0.77193	0.000163189	TRUE	FALSE	0
cg07681512	X	118827369	SEPT6;SEPT6;SEPT6;SEPT6	0.903509	0	0.801754	4.64892e-05	FALSE	FALSE	0
cg07682072	X	48367166	PORCN;PORCN;PORCN;PORCN;PORCN	0.842105	0	0.801754	4.64892e-05	FALSE	FALSE	0
cg07688274	1	228777936		0.907018	0	0.849123	0	FALSE	FALSE	0
cg07718418	X	153736032	FAM3A;FAM3A;FAM3A;FAM3A;FAM3A;FAM3A	0.870175	0	0.891228	0	FALSE	FALSE	0
cg07743548	6	169043060	SMOC2;SMOC2	0.854386	0	0.842105	0	FALSE	FALSE	0
cg07745596	10	54538682		0.877193	0	0.875439	0	FALSE	TRUE	0
cg07748270	7	44365023	CAMK2B;CAMK2B;CAMK2B;CAMK2B;CAMK2B;CAMK2B;CAMK2B;CAMK2B;CAMK2B;CAMK2B;CAMK2B;CAMK2B;CAMK2B;CAMK2B;CAMK2B;CAMK2B;CAMK2B;CAMK2B	0.866667	0	0.836842	0	FALSE	FALSE	0
cg07750402	X	48814932	OTUD5;OTUD5;OTUD5;OTUD5	0.908772	0	0.805263	3.84027e-05	TRUE	FALSE	0
cg07761447	9	132565438	TOR1B;TOR1B	0.882456	0	0.357895	0.132908	FALSE	FALSE	0
cg07770093	X	136115530		0.836842	0	0.812281	2.48466e-05	FALSE	FALSE	0
cg07771637	X	134186198	FAM127B;FAM127B;FAM127B;FAM127B	0.870175	0	0.808772	3.12119e-05	FALSE	FALSE	0
cg07771656	X	10222682		0.838596	0	0.838596	0	FALSE	FALSE	0
cg07772467	X	30671633	GK;GK;GK;GK;GK;GK	0.875439	0	0.889474	0	FALSE	FALSE	0
cg07772999	2	113993052	PAX8;PAX8;PAX8;PAX8;PAX8;LOC440839;LOC654433	0.87193	0	0.882456	0	FALSE	TRUE	0
cg07791065	6	113786051		0.875439	0	0.798246	5.5546e-05	TRUE	FALSE	0
cg07796014	X	11129290	HCCS;HCCS	0.859649	0	0.822807	1.006e-05	FALSE	FALSE	0
cg07799180	Y	7193685	PRKY	0.877193	0	0.792982	7.1125e-05	FALSE	FALSE	0
cg07799491	X	149861526	MTMR1	0.836842	0	0.842105	0	TRUE	FALSE	0
cg07806343	X	129194523		0.850877	0	0.72807	0.000601715	TRUE	FALSE	0
cg07810091	X	48534493		0.87193	0	0.840351	0	FALSE	FALSE	0
cg07819186	X	51486448	GSPT2	0.903509	0	0.826316	6.37252e-06	TRUE	FALSE	0
cg07826058	X	21857614	MBTPS2	0.905263	0	0.864912	0	TRUE	FALSE	0
cg07832156	X	123094401	LOC101928402;STAG2;STAG2;STAG2;STAG2;STAG2	0.849123	0	0.87193	0	FALSE	FALSE	0
cg07834321	7	159531		0.880702	0	0.836842	0	FALSE	FALSE	0
cg07851521	Y	6113261	TSPY2	0.882456	0	0.715789	0.000817526	FALSE	FALSE	0
cg07854829	2	242917335	LOC102723927;LINC01237	0.866667	0	0.757895	0.000259311	FALSE	FALSE	0
cg07858069	X	21958690	SMS	0.850877	0	0.721053	0.000718586	FALSE	FALSE	0
cg07861180	X	129066829		0.864912	0	0.764912	0.000207123	TRUE	FALSE	0
cg07874445	X	153166595	AVPR2	0.863158	0	0.868421	0	FALSE	FALSE	0
cg07881677	17	2304589	MNT	0.873684	0	0.861404	0	FALSE	FALSE	0
cg07890967	X	123470509		0.857895	0	0.8	5.08914e-05	FALSE	FALSE	0
cg07891820	4	7799636	AFAP1;AFAP1	0.838596	0	0.815789	1.92403e-05	FALSE	TRUE	0
cg07892140	14	106371587		0.840351	0	0.826316	6.37252e-06	FALSE	FALSE	0
cg07892321	X	57145316		0.866667	0	0.854386	0	FALSE	FALSE	0
cg07893512	16	214776	HBM	0.854386	0	0.668421	0.00229968	FALSE	TRUE	0
cg07899532	6	31458944		0.903509	0	0.749123	0.000337889	FALSE	FALSE	0
cg07903626	16	66098650		0.854386	0	0.777193	0.000135032	TRUE	FALSE	0
cg07910525	X	51075582	NUDT10	0.894737	0	0.778947	0.000126481	FALSE	FALSE	0
cg07921660	X	11781090	MSL3;MSL3;MSL3;MSL3;MSL3	0.875439	0	0.664912	0.00246427	FALSE	FALSE	0
cg07923588	6	150312704		0.836842	0	0.633333	0.0044257	FALSE	FALSE	0
cg07926482	16	84651521	COTL1;COTL1	0.849123	0	0.368421	0.12127	FALSE	FALSE	0
cg07929406	X	139587304	SOX3	0.878947	0	0.761404	0.000232117	TRUE	FALSE	0
cg07929499	X	109154898		0.838596	0	0.819298	1.4331e-05	FALSE	FALSE	0
cg07930217	X	106871770	PRPS1;PRPS1	0.859649	0	0.775439	0.000143992	FALSE	FALSE	0
cg07933757	X	150066987	CD99L2;CD99L2;CD99L2	0.866667	0	0.736842	0.000477298	FALSE	FALSE	0
cg07934435	X	153200807	NAA10;NAA10;NAA10;RENBP	0.901754	0	0.794737	6.56523e-05	FALSE	FALSE	0
cg07935500	15	80696529	ARNT2	0.838596	0	0.621053	0.0054697	FALSE	FALSE	0
cg07940380	X	67653182	OPHN1;OPHN1	0.882456	0	0.835088	0	TRUE	FALSE	0
cg07940804	X	127185902	ACTRT1	0.882456	0	0.852632	0	FALSE	FALSE	0
cg07953307	16	29000920	LAT;LAT;LAT;LAT	0.877193	0	0.798246	5.5546e-05	FALSE	FALSE	0
cg07954607	X	101380464	TCEAL2	0.873684	0	0.845614	0	TRUE	FALSE	0
cg07960942	X	71130741	NHSL2	0.891228	0	0.736842	0.000477298	FALSE	FALSE	0
cg07989438	X	48769191	SLC35A2;SLC35A2;SLC35A2;SLC35A2;SLC35A2;SLC35A2;SLC35A2;SLC35A2;SLC35A2;SLC35A2;SLC35A2;SLC35A2;SLC35A2;SLC35A2;SLC35A2;SLC35A2	0.875439	0	0.715789	0.000817526	TRUE	FALSE	0
cg07990395	X	138287169	FGF13;FGF13;FGF13;FGF13;FGF13;FGF13	0.842105	0	0.747368	0.000355578	TRUE	FALSE	0
cg08022281	6	29648345		0.878947	0	0.798246	5.5546e-05	FALSE	FALSE	0
cg08024264	17	75084281	SCARNA16;C17orf86	0.9	0	0.833333	5.45502e-07	TRUE	FALSE	0
cg08027640	1	8021945	PARK7;PARK7	0.836842	0	0.65614	0.00291815	FALSE	FALSE	0
cg08029281	1	67600428		0.891228	0	0.749123	0.000337889	FALSE	TRUE	0
cg08039008	3	195717366	SDHAP1	0.861404	0	0.85614	0	FALSE	FALSE	0
cg08041448	6	29648901		0.873684	0	0.814035	2.19525e-05	FALSE	FALSE	0
cg08044366	6	71158203	FAM135A;FAM135A;FAM135A	0.859649	0	0.847368	0	FALSE	FALSE	0
cg08063601	X	66763942	AR;AR	0.854386	0	0.701754	0.00113548	FALSE	FALSE	0
cg08065501	X	48755716	PQBP1;TIMM17B;PQBP1;PQBP1;PQBP1;PQBP1;TIMM17B;PQBP1;PQBP1;PQBP1;PQBP1;PQBP1	0.845614	0	0.736842	0.000477298	TRUE	FALSE	0
cg08071329	6	170555857		0.880702	0	0.849123	0	FALSE	FALSE	0
cg08076861	X	152599398	ZNF275	0.857895	0	0.780702	0.000118322	TRUE	FALSE	0
cg08084429	10	126229822	LHPP;LHPP	0.836842	0	0.910526	0	TRUE	FALSE	0
cg08090769	12	66582568	IRAK3;IRAK3	0.836842	0	0.277193	0.24962	FALSE	FALSE	0
cg08096812	8	142440046	PTP4A3;PTP4A3	0.847368	0	0.836842	0	FALSE	TRUE	0
cg08097522	X	48833607	GRIPAP1;GRIPAP1	0.84386	0	0.833333	5.45502e-07	FALSE	FALSE	0
cg08099713	X	108780198	NXT2;NXT2;NXT2;NXT2	0.849123	0	0.8	5.08914e-05	TRUE	FALSE	0
cg08112003	8	7774161		0.903509	0	0.894737	0	TRUE	FALSE	0
cg08118032	X	46306550	ZNF673;ZNF673;ZNF673;ZNF673	0.885965	0	0.815789	1.92403e-05	TRUE	FALSE	0
cg08120976	X	70354596	MED12	0.840351	0	0.803509	4.23294e-05	FALSE	FALSE	0
cg08122685	22	21409190	LRRC74B;LRRC74B;LRRC74B	0.861404	0	0.75614	0.000273778	TRUE	FALSE	0
cg08138245	17	78231489		0.870175	0	0.801754	4.64892e-05	TRUE	FALSE	0
cg08143045	1	171807195		0.880702	0	0.72807	0.000601715	TRUE	TRUE	0
cg08147831	X	128977722	ZDHHC9;ZDHHC9;ZDHHC9	0.894737	0	0.768421	0.000184191	TRUE	FALSE	0
cg08156396	X	135991445		0.908772	0	0.764912	0.000207123	FALSE	FALSE	0
cg08157084	10	27001461	PDSS1	0.885965	0	0.842105	0	TRUE	FALSE	0
cg08195522	X	73512305	NCRNA00182	0.87193	0	0.805263	3.84027e-05	FALSE	FALSE	0
cg08209483	X	118110092	LONRF3;LONRF3	0.868421	0	0.824561	8.14662e-06	FALSE	FALSE	0
cg08214328	X	16731095	CTPS2;CTPS2;CTPS2	0.887719	0	0.840351	0	FALSE	FALSE	0
cg08218468	10	13570459		0.835088	0	0.707018	0.00100637	FALSE	FALSE	0
cg08236388	16	1223400	CACNA1H;CACNA1H	0.891228	0	0.892982	0	FALSE	FALSE	0
cg08238375	5	112483149	MCC;MCC	0.873684	0	0.750877	0.000320886	TRUE	FALSE	0
cg08242313	2	225634471	DOCK10;DOCK10	0.836842	0	0.698246	0.00122872	TRUE	FALSE	0
cg08242338	Y	6114379	TSPY2	0.847368	0	0.661404	0.00263834	FALSE	FALSE	0
cg08243259	15	62951029	TLN2	0.845614	0	0.8	5.08914e-05	TRUE	FALSE	0
cg08251427	1	142890938		0.875439	0	0.917544	7.99524e-07	FALSE	FALSE	0
cg08253809	14	23568017	C14orf119	0.850877	0	0.792982	7.1125e-05	TRUE	FALSE	0
cg08261807	X	133304356	MIR20B;MIR363;MIR106A;MIR18B;MIR19B2;MIR92A2	0.877193	0	0.859649	0	FALSE	FALSE	0
cg08262933	X	102941498	MORF4L2;MORF4L2;MORF4L2;MORF4L2;MORF4L2;MORF4L2;MORF4L2;MORF4L2;MORF4L2;MORF4L2;MORF4L2;MORF4L2;MORF4L2;MORF4L2;MORF4L2;MORF4L2	0.864912	0	0.701754	0.00113548	FALSE	FALSE	0
cg08275242	X	69353171	IGBP1	0.873684	0	0.733333	0.000524361	TRUE	FALSE	0
cg08279496	X	133370993	CCDC160	0.864912	0	0.736842	0.000477298	FALSE	FALSE	0
cg08279515	X	132091534	HS6ST2;HS6ST2	0.880702	0	0.861404	0	TRUE	FALSE	0
cg08282540	X	119149500		0.868421	0	0.891228	0	FALSE	FALSE	0
cg08296461	9	129175987	MVB12B	0.863158	0	0.801754	4.64892e-05	TRUE	FALSE	0
cg08300622	X	18372963	SCML2	0.847368	0	0.817544	1.67023e-05	TRUE	FALSE	0
cg08304428	X	71459274	ERCC6L;PIN4	0.87193	0	0.780702	0.000118322	FALSE	FALSE	0
cg08310519	11	86305199	ME3;ME3;ME3	0.910526	0	0.801754	4.64892e-05	TRUE	TRUE	0
cg08324927	20	47044835		0.905263	0	0.775439	0.000143992	TRUE	FALSE	0
cg08327960	X	38663047	MID1IP1;MID1IP1;MID1IP1	0.889474	0	0.740351	0.000433605	TRUE	FALSE	0
cg08337312	20	51588860	TSHZ2	0.87193	0	0.808772	3.12119e-05	FALSE	FALSE	0
cg08337341	5	42924013		0.854386	0	0.768421	0.000184191	FALSE	FALSE	0
cg08342708	X	49773710	CLCN5;CLCN5;MIR501	0.884211	0	0.831579	1.82368e-06	FALSE	FALSE	0
cg08346443	7	68527554		0.857895	0	0.838596	0	TRUE	FALSE	0
cg08348857	X	48596969		0.857895	0	0.829825	3.21707e-06	FALSE	FALSE	0
cg08355317	X	100642128	BTK	0.836842	0	0.785965	9.60713e-05	TRUE	FALSE	0
cg08358587	X	100603709	TIMM8A;TIMM8A;TIMM8A	0.852632	0	0.75614	0.000273778	FALSE	FALSE	0
cg08359343	4	146478783	SMAD1;SMAD1	0.840351	0	0.829825	3.21707e-06	FALSE	FALSE	0
cg08361660	X	153745363	FAM3A;FAM3A;FAM3A;FAM3A;FAM3A;FAM3A	0.838596	0	0.72807	0.000601715	FALSE	FALSE	0
cg08362273	17	46719577		0.854386	0	0.747368	0.000355578	FALSE	FALSE	0
cg08378017	2	105760444		0.849123	0	0.652632	0.0031178	FALSE	FALSE	0
cg08379726	22	44351092	SAMM50	0.842105	0	0.654386	0.00301662	FALSE	FALSE	0
cg08382737	19	49617001	LIN7B	0.854386	0	0.87193	0	FALSE	TRUE	0
cg08391287	16	50186918	PAPD5;PAPD5	0.852632	0	0.512281	0.0266018	FALSE	FALSE	0
cg08402708	11	85656173		0.877193	0	0.905263	0	TRUE	FALSE	0
cg08405463	X	118108651	LONRF3;LONRF3	0.887719	0	0.773684	0.000153372	TRUE	FALSE	0
cg08408543	4	92014350	CCSER1	0.905263	0	0.833333	5.45502e-07	FALSE	FALSE	0
cg08414807	X	68748938	FAM155B	0.868421	0	0.87193	0	FALSE	FALSE	0
cg08422420	5	1594733	SDHAP3	0.887719	0	0.87193	0	FALSE	FALSE	0
cg08422514	X	153775441	G6PD;G6PD;IKBKG;IKBKG;IKBKG;IKBKG	0.896491	0	0.710526	0.000927047	FALSE	FALSE	0
cg08428398	X	68117948		0.863158	0	0.875439	0	FALSE	FALSE	0
cg08434127	19	46405274	MYPOP	0.892982	0	0.868421	0	FALSE	TRUE	0
cg08434396	X	146993778	ASFMR1;ASFMR1;ASFMR1;ASFMR1;ASFMR1;FMR1	0.845614	0	0.770175	0.000173456	TRUE	FALSE	0
cg08446187	X	154299289	MTCP1;MTCP1NB;BRCC3;MTCP1;BRCC3;MTCP1NB	0.864912	0	0.736842	0.000477298	TRUE	FALSE	0
cg08447449	X	117250943	KLHL13;KLHL13;KLHL13	0.836842	0	0.773684	0.000153372	FALSE	FALSE	0
cg08452658	15	83776271	TM6SF1;TM6SF1	0.861404	0	0.768421	0.000184191	FALSE	FALSE	0
cg08460331	X	100673802	ARMCX4	0.847368	0	0.789474	8.29641e-05	FALSE	FALSE	0
cg08461617	X	19534066	MAP3K15	0.847368	0	0.777193	0.000135032	TRUE	FALSE	0
cg08464958	X	2852845	ARSE	0.847368	0	0.775439	0.000143992	FALSE	FALSE	0
cg08470157	X	30671302	GK;GK;GK	0.861404	0	0.707018	0.00100637	FALSE	FALSE	0
cg08477332	1	153590243	S100A14	0.903509	0	0.87193	0	TRUE	TRUE	0
cg08479532	X	109560744	AMMECR1;AMMECR1;AMMECR1	0.87193	0	0.749123	0.000337889	TRUE	FALSE	0
cg08482258	1	186823283	PLA2G4A	0.850877	0	0.770175	0.000173456	FALSE	FALSE	0
cg08489109	6	132297508		0.861404	0	0.661404	0.00263834	TRUE	FALSE	0
cg08491314	X	124336782		0.85614	0	0.622807	0.00530932	FALSE	FALSE	0
cg08497953	20	23756826		0.9	0	0.798246	5.5546e-05	TRUE	FALSE	0
cg08498653	X	18459007	CDKL5;CDKL5	0.850877	0	0.815789	1.92403e-05	FALSE	FALSE	0
cg08503300	7	47122887		0.850877	0	0.752632	0.000304546	TRUE	FALSE	0
cg08523029	5	130500466	HINT1;HINT1;HINT1	0.840351	0	0.861404	0	FALSE	TRUE	0
cg08527118	10	44184401		0.85614	0	0.766667	0.000195408	FALSE	FALSE	0
cg08530317	11	20620824	SLC6A5	0.849123	0	0.691228	0.00143375	FALSE	FALSE	0
cg08558974	2	242949581		0.885965	0	0.87193	0	FALSE	FALSE	0
cg08563994	3	49823664	IP6K1;IP6K1	0.838596	0	0.621053	0.0054697	FALSE	FALSE	0
cg08571287	2	132431275		0.840351	0	0.942105	5.08699e-06	FALSE	FALSE	0
cg08571655	X	37892523	SYTL5;SYTL5;SYTL5	0.84386	0	0.835088	0	FALSE	FALSE	0
cg08573069	X	105066049	NRK	0.885965	0	0.854386	0	FALSE	FALSE	0
cg08573404	X	120296170		0.873684	0	0.870175	0	FALSE	FALSE	0
cg08583823	X	153599824	FLNA;FLNA	0.887719	0	0.75614	0.000273778	FALSE	FALSE	0
cg08588626	X	17393327	NHS	0.864912	0	0.677193	0.00192701	FALSE	FALSE	0
cg08590319	X	150571480	VMA21	0.863158	0	0.891228	0	FALSE	FALSE	0
cg08591489	X	118699483	CXorf56;CXorf56;CXorf56	0.852632	0	0.782456	0.000110543	FALSE	FALSE	0
cg08597142	8	12549925		0.873684	0	0.910526	0	FALSE	TRUE	0
cg08605656	X	73642885	SLC16A2	0.836842	0	0.805263	3.84027e-05	FALSE	FALSE	0
cg08616853	2	233270950	ALPPL2	0.868421	0	0.417544	0.0765833	FALSE	FALSE	0
cg08623691	X	70288356	SNX12	0.903509	0	0.878947	0	FALSE	FALSE	0
cg08627233	X	153236954	TMEM187;HCFC1	0.840351	0	0.708772	0.000966054	TRUE	FALSE	0
cg08634339	X	129067002		0.85614	0	0.85614	0	FALSE	FALSE	0
cg08642787	X	83443104	RPS6KA6	0.849123	0	0.789474	8.29641e-05	TRUE	FALSE	0
cg08656326	9	84304414	TLE1	0.85614	0	0.791228	7.68918e-05	FALSE	FALSE	0
cg08658442	1	162946721		0.868421	0	0.557895	0.0145044	FALSE	FALSE	0
cg08663085	X	149106624	LOC100272228;CXorf40B;CXorf40B	0.864912	0	0.814035	2.19525e-05	TRUE	FALSE	0
cg08691237	11	218612	SIRT3;SIRT3	0.864912	0	0.866667	0	FALSE	FALSE	0
cg08693745	12	132286231		0.859649	0	0.810526	2.79303e-05	FALSE	FALSE	0
cg08711005	1	9596358		0.842105	0	0.880702	0	TRUE	FALSE	0
cg08730239	12	47226453		0.850877	0	0.659649	0.00272906	FALSE	FALSE	0
cg08738066	19	52692915	PPP2R1A;PPP2R1A	0.836842	0	0.833333	5.45502e-07	FALSE	FALSE	0
cg08745965	5	135416529	MIR886	0.903509	0	0.838596	0	FALSE	FALSE	0
cg08757314	X	52005211		0.854386	0	0.814035	2.19525e-05	FALSE	FALSE	0
cg08757719	X	102862789	TCEAL3;TCEAL3	0.842105	0	0.724561	0.000658097	FALSE	FALSE	0
cg08761410	22	32058119		0.854386	0	0.622807	0.00530932	FALSE	FALSE	0
cg08774483	X	38663490	MID1IP1;MID1IP1;MID1IP1;MID1IP1	0.85614	0	0.719298	0.000750442	FALSE	FALSE	0
cg08775595	8	126608642		0.880702	0	0.949123	5.99822e-06	TRUE	FALSE	0
cg08779783	X	136509907		0.875439	0	0.829825	3.21707e-06	FALSE	FALSE	0
cg08780887	10	54532905	MBL2	0.859649	0	0.814035	2.19525e-05	FALSE	FALSE	0
cg08785433	X	17846877	RAI2;RAI2;RAI2;RAI2;RAI2;RAI2	0.838596	0	0.8	5.08914e-05	FALSE	FALSE	0
cg08785871	7	1530505	INTS1	0.892982	0	0.712281	0.000889312	FALSE	FALSE	0
cg08790439	5	163894376	LOC101927835	0.840351	0	0.864912	0	FALSE	FALSE	0
cg08798116	X	132548882	GPC4	0.85614	0	0.821053	1.21192e-05	TRUE	FALSE	0
cg08804013	16	69600791	NFAT5;NFAT5;NFAT5;NFAT5;MIR1538;NFAT5	0.85614	0	0.798246	5.5546e-05	FALSE	FALSE	0
cg08817443	X	135579746	HTATSF1;HTATSF1;HTATSF1	0.882456	0	0.854386	0	FALSE	FALSE	0
cg08822578	13	21559615	LATS2	0.850877	0	0.868421	0	FALSE	TRUE	0
cg08834580	X	102312389		0.877193	0	0.878947	0	FALSE	FALSE	0
cg08834691	7	45808733	2022-09-13	0.840351	0	0.742105	0.000412963	FALSE	TRUE	0
cg08860608	X	135332975	MAP7D3	0.884211	0	0.74386	0.000393093	TRUE	FALSE	0
cg08880082	14	90165664		0.842105	0	0.787719	8.93533e-05	FALSE	FALSE	0
cg08880261	21	43547872	UMODL1;UMODL1	0.880702	0	0.782456	0.000110543	TRUE	FALSE	0
cg08887025	1	246415176	SMYD3;SMYD3	0.85614	0	0.657895	0.00282231	TRUE	FALSE	0
cg08890411	1	211905584		0.873684	0	0.822807	1.006e-05	TRUE	FALSE	0
cg08894280	13	99500700	DOCK9;DOCK9	0.852632	0	0.835088	0	TRUE	FALSE	0
cg08895130	X	49676730		0.840351	0	0.847368	0	FALSE	FALSE	0
cg08900977	19	42637295	POU2F2	0.894737	0	0.575439	0.0112553	FALSE	FALSE	0
cg08902358	X	135229362	FHL1;FHL1;FHL1;FHL1;FHL1	0.870175	0	0.722807	0.000687814	TRUE	FALSE	0
cg08912652	11	130779479	SNX19	0.852632	0	0.803509	4.23294e-05	TRUE	FALSE	0
cg08937153	8	48504810	SPIDR;SPIDR;SPIDR;SPIDR	0.840351	0	0.831579	1.82368e-06	FALSE	FALSE	0
cg08945432	X	107393057	ATG4A;ATG4A	0.836842	0	0.731579	0.000549219	FALSE	FALSE	0
cg08952424	X	70338432	MED12;MED12	0.878947	0	0.794737	6.56523e-05	TRUE	FALSE	0
cg08955276	X	67719027	YIPF6	0.887719	0	0.875439	0	TRUE	FALSE	0
cg08975641	2	189959552	COL5A2	0.896491	0	0.784211	0.00010313	FALSE	FALSE	0
cg08989903	1	24952794		0.859649	0	0.835088	0	FALSE	FALSE	0
cg08991015	X	134049419	MOSPD1	0.87193	0	0.796491	6.04628e-05	TRUE	FALSE	0
cg08991232	8	70746365	SLCO5A1;SLCO5A1;SLCO5A1	0.84386	0	0.787719	8.93533e-05	FALSE	FALSE	0
cg08998989	X	17755531	SCML1;SCML1;SCML1;SCML1	0.882456	0	0.819298	1.4331e-05	FALSE	FALSE	0
cg08999332	X	102192192	RAB40AL	0.84386	0	0.831579	1.82368e-06	FALSE	FALSE	0
cg09004167	1	17053983		0.838596	0	0.912281	0	FALSE	FALSE	0
cg09027985	17	46973122	ATP5G1;ATP5G1	0.863158	0	0.819298	1.4331e-05	FALSE	FALSE	0
cg09034929	X	70288225	SNX12;SNX12	0.891228	0	0.740351	0.000433605	FALSE	FALSE	0
cg09050820	6	167586206	TCP10L2	0.875439	0	0.761404	0.000232117	FALSE	TRUE	0
cg09055253	X	153990874	DKC1;DKC1	0.889474	0	0.845614	0	TRUE	FALSE	0
cg09056691	X	154033836	MPP1;MPP1;MPP1;MPP1	0.907018	0	0.673684	0.00206967	TRUE	FALSE	0
cg09058241	X	134232821	NCRNA00087	0.854386	0	0.778947	0.000126481	FALSE	FALSE	0
cg09070199	X	62570990	SPIN4;SPIN4	0.854386	0	0.694737	0.00132804	FALSE	FALSE	0
cg09072865	X	106243506	MORC4;MORC4	0.836842	0	0.714035	0.000852816	TRUE	FALSE	0
cg09080788	17	13927712	CDRT15P	0.857895	0	0.807018	3.46999e-05	TRUE	FALSE	0
cg09084933	X	57148116	SPIN2B;SPIN2B;SPIN2B	0.854386	0	0.768421	0.000184191	TRUE	FALSE	0
cg09106586	6	31802656	C6orf48;SNORD48;C6orf48	0.884211	0	0.747368	0.000355578	FALSE	FALSE	0
cg09113420	2	207027298	EEF1B2;EEF1B2;EEF1B2	0.885965	0	0.815789	1.92403e-05	FALSE	FALSE	0
cg09120487	1	11515313		0.87193	0	0.752632	0.000304546	FALSE	FALSE	0
cg09122412	X	107683435	COL4A5;COL4A5;COL4A6;COL4A5	0.864912	0	0.796491	6.04628e-05	FALSE	FALSE	0
cg09130192	2	10161320		0.852632	0	0.722807	0.000687814	FALSE	FALSE	0
cg09134165	X	47004911	RBM10;NDUFB11;NDUFB11;RBM10;NDUFB11;NDUFB11	0.870175	0	0.703509	0.00109104	TRUE	FALSE	0
cg09141759	2	219120255		0.842105	0	0.859649	0	FALSE	FALSE	0
cg09144786	X	117479692	WDR44	0.85614	0	0.752632	0.000304546	FALSE	FALSE	0
cg09144828	5	172988196		0.838596	0	0.833333	5.45502e-07	FALSE	FALSE	0
cg09148853	X	138525808		0.887719	0	0.815789	1.92403e-05	TRUE	FALSE	0
cg09152401	12	9436616	LOC642846	0.887719	0	0.896491	0	FALSE	FALSE	0
cg09168692	1	7887560	PER3	0.836842	0	0.689474	0.0014891	FALSE	FALSE	0
cg09183404	X	99891932	TSPAN6;TSPAN6;TSPAN6;TSPAN6;TSPAN6;TSPAN6;TSPAN6;TSPAN6	0.884211	0	0.898246	0	FALSE	FALSE	0
cg09185350	X	50556361	SHROOM4;SHROOM4	0.907018	0	0.735088	0.000500396	FALSE	FALSE	0
cg09193347	15	79381867	RASGRF1;RASGRF1	0.838596	0	0.789474	8.29641e-05	FALSE	FALSE	0
cg09197653	7	65591306	CRCP;CRCP;CRCP;CRCP;CRCP	0.870175	0	0.789474	8.29641e-05	TRUE	FALSE	0
cg09202373	X	153640674	DNASE1L1;DNASE1L1;TAZ;TAZ;TAZ;TAZ;TAZ;DNASE1L1	0.873684	0	0.8	5.08914e-05	TRUE	FALSE	0
cg09207137	X	21958629	SMS	0.878947	0	0.682456	0.00172809	TRUE	FALSE	0
cg09211701	15	48938228	FBN1	0.85614	0	0.480702	0.0389093	FALSE	FALSE	0
cg09219280	1	61869782	NFIA;NFIA;NFIA;NFIA	0.842105	0	0.701754	0.00113548	FALSE	FALSE	0
cg09222696	X	153237363	TMEM187;HCFC1	0.882456	0	0.717544	0.000783412	FALSE	FALSE	0
cg09223632	Y	10033460		0.852632	0	0.835088	0	FALSE	FALSE	0
cg09228985	Y	21666078	BCORL2	0.847368	0	0.719298	0.000750442	FALSE	TRUE	0
cg09229960	X	153607856	EMD	0.854386	0	0.740351	0.000433605	TRUE	FALSE	0
cg09250473	19	50168907	IRF3;IRF3;BCL2L12;BCL2L12;BCL2L12;BCL2L12	0.850877	0	0.585965	0.00960858	FALSE	TRUE	0
cg09250703	X	15511751	PIR;PIR	0.880702	0	0.759649	0.00024543	FALSE	FALSE	0
cg09275137	X	153238579	TMEM187	0.835088	0	0.784211	0.00010313	FALSE	FALSE	0
cg09278708	X	101905837	GPRASP1;GPRASP1;GPRASP1	0.870175	0	0.842105	0	TRUE	FALSE	0
cg09279404	1	144340103	LOC728855;LOC728855;LOC728875	0.84386	0	0.614035	0.00615134	FALSE	FALSE	0
cg09284428	X	11116465		0.878947	0	0.9	0	FALSE	FALSE	0
cg09287977	2	114326007		0.84386	0	0.785965	9.60713e-05	FALSE	FALSE	0
cg09301498	7	57324701		0.894737	0	0.896491	0	FALSE	FALSE	0
cg09307518	9	38334106		0.84386	0	0.640351	0.00390643	TRUE	FALSE	0
cg09309899	X	148586967	IDS;IDS;IDS	0.87193	0	0.717544	0.000783412	TRUE	FALSE	0
cg09324493	X	129658235		0.901754	0	0.794737	6.56523e-05	FALSE	FALSE	0
cg09331190	6	158390146		0.894737	0	0.829825	3.21707e-06	TRUE	FALSE	0
cg09331640	3	150264376	SERP1;SERP1;EIF2A	0.836842	0	0.536842	0.0193634	FALSE	FALSE	0
cg09336323	2	210074276		0.863158	0	0.768421	0.000184191	FALSE	TRUE	0
cg09345954	2	198669339	PLCL1	0.850877	0	0.45614	0.0512663	FALSE	FALSE	0
cg09354738	X	73513143	NCRNA00182	0.864912	0	0.764912	0.000207123	TRUE	FALSE	0
cg09357750	6	156188073		0.838596	0	0.717544	0.000783412	FALSE	TRUE	0
cg09380357	7	151042072	NUB1	0.896491	0	0.807018	3.46999e-05	FALSE	FALSE	0
cg09396433	X	152200332		0.838596	0	0.808772	3.12119e-05	FALSE	FALSE	0
cg09396999	X	68605922		0.857895	0	0.810526	2.79303e-05	FALSE	FALSE	0
cg09399550	3	150496342		0.882456	0	0.861404	0	FALSE	FALSE	0
cg09409209	2	241988102	SNED1	0.85614	0	0.870175	0	FALSE	FALSE	0
cg09411587	X	153990928	DKC1;DKC1	0.850877	0	0.817544	1.67023e-05	TRUE	FALSE	0
cg09413645	4	77933741	2022-09-11	0.84386	0	0.789474	8.29641e-05	TRUE	FALSE	0
cg09414262	22	19594239		0.845614	0	0.715789	0.000817526	FALSE	FALSE	0
cg09418475	X	153718920	SLC10A3;SLC10A3;SLC10A3;SLC10A3	0.894737	0	0.840351	0	TRUE	FALSE	0
cg09426834	2	946648	SNTG2;SNTG2	0.882456	0	0.873684	0	FALSE	FALSE	0
cg09428674	2	1518668	TPO;TPO;TPO;TPO;TPO;TPO	0.887719	0	0.77193	0.000163189	TRUE	FALSE	0
cg09434603	5	499552	SLC9A3	0.861404	0	0.845614	0	TRUE	FALSE	0
cg09438069	4	187581093	FAT1	0.845614	0	0.812281	2.48466e-05	TRUE	FALSE	0
cg09449562	1	203000742	PPFIA4;PPFIA4	0.857895	0	0.791228	7.68918e-05	FALSE	FALSE	0
cg09451525	X	69369767	IGBP1	0.85614	0	0.836842	0	FALSE	FALSE	0
cg09456260	5	134356061		0.896491	0	0.84386	0	TRUE	FALSE	0
cg09465746	3	6904386	GRM7;GRM7	0.859649	0	0.821053	1.21192e-05	FALSE	FALSE	0
cg09466685	X	152875961		0.901754	0	0.854386	0	TRUE	FALSE	0
cg09473230	X	37079510		0.87193	0	0.815789	1.92403e-05	FALSE	FALSE	0
cg09506783	X	47817213		0.864912	0	0.850877	0	FALSE	FALSE	0
cg09510698	6	33092130	HLA-DPB2	0.896491	0	0.896491	0	TRUE	FALSE	0
cg09523186	X	80064924	BRWD3	0.842105	0	0.703509	0.00109104	TRUE	FALSE	0
cg09530349	X	19361981	PDHA1;PDHA1;PDHA1;PDHA1	0.870175	0	0.710526	0.000927047	FALSE	FALSE	0
cg09547625	2	235453893		0.835088	0	0.840351	0	FALSE	TRUE	0
cg09547990	9	132931107		0.880702	0	0.770175	0.000173456	FALSE	FALSE	0
cg09550508	17	26859556	FOXN1	0.84386	0	0.807018	3.46999e-05	TRUE	FALSE	0
cg09556042	6	31237013	HLA-C	0.907018	0	0.829825	3.21707e-06	FALSE	FALSE	0
cg09572920	X	39866872		0.85614	0	0.747368	0.000355578	FALSE	FALSE	0
cg09588271	1	62784651	KANK4	0.845614	0	0.742105	0.000412963	FALSE	TRUE	0
cg09598844	X	102941788	MORF4L2;MORF4L2;MORF4L2;MORF4L2;MORF4L2;MORF4L2;MORF4L2;MORF4L2;MORF4L2;MORF4L2;MORF4L2;MORF4L2;MORF4L2;MORF4L2;MORF4L2;MORF4L2	0.845614	0	0.852632	0	TRUE	FALSE	0
cg09605191	11	27371297	CCDC34;CCDC34	0.836842	0	0.805263	3.84027e-05	FALSE	FALSE	0
cg09610589	X	149106647	LOC100272228;CXorf40B;CXorf40B	0.842105	0	0.74386	0.000393093	FALSE	FALSE	0
cg09624684	X	152599453	ZNF275	0.863158	0	0.729825	0.000574995	TRUE	FALSE	0
cg09627057	3	15377670	SH3BP5	0.863158	0	0.787719	8.93533e-05	TRUE	FALSE	0
cg09654329	4	3413614	RGS12;RGS12;RGS12	0.877193	0	0.936842	4.30551e-06	FALSE	FALSE	0
cg09662907	X	119764367	C1GALT1C1;C1GALT1C1	0.877193	0	0.850877	0	FALSE	FALSE	0
cg09665904	X	113816090		0.859649	0	0.9	0	FALSE	FALSE	0
cg09678836	13	113623844	MCF2L	0.859649	0	0.391228	0.0986274	FALSE	FALSE	0
cg09679971	X	70858579	BCYRN1	0.854386	0	0.873684	0	FALSE	FALSE	0
cg09690118	11	1213284		0.842105	0	0.808772	3.12119e-05	FALSE	FALSE	0
cg09703824	X	107976020	IRS4	0.840351	0	0.808772	3.12119e-05	FALSE	FALSE	0
cg09720420	X	142722174	SLITRK4	0.875439	0	0.801754	4.64892e-05	TRUE	FALSE	0
cg09720515	X	71792701	HDAC8;HDAC8;HDAC8;HDAC8;HDAC8;HDAC8;HDAC8;HDAC8;HDAC8;HDAC8;HDAC8;HDAC8	0.892982	0	0.72807	0.000601715	TRUE	FALSE	0
cg09723088	6	29691140	HLA-F;HLA-F;HLA-F;HLA-F;HLA-F;HLA-F	0.894737	0	0.919298	1.15358e-06	TRUE	FALSE	0
cg09724624	X	107019195	TSC22D3	0.836842	0	0.766667	0.000195408	TRUE	FALSE	0
cg09730272	12	9709778		0.901754	0	0.763158	0.000219354	TRUE	FALSE	0
cg09731745	10	134473515	INPP5A	0.873684	0	0.664912	0.00246427	FALSE	FALSE	0
cg09732868	4	46893766	COX7B2	0.835088	0	0.768421	0.000184191	TRUE	FALSE	0
cg09734952	X	13671285	TCEANC	0.887719	0	0.877193	0	FALSE	FALSE	0
cg09735782	X	72782845	LOC139201;CHIC1	0.854386	0	0.729825	0.000574995	TRUE	FALSE	0
cg09737870	6	33036717	HLA-DPA1	0.864912	0	0.877193	0	FALSE	FALSE	0
cg09743261	X	71458871	ERCC6L;PIN4	0.907018	0	0.877193	0	FALSE	FALSE	0
cg09764916	X	148843651		0.891228	0	0.931579	3.44351e-06	FALSE	FALSE	0
cg09768983	4	183935060		0.905263	0	0.842105	0	FALSE	TRUE	0
cg09773839	X	149106454	LOC100272228;CXorf40B;CXorf40B	0.845614	0	0.722807	0.000687814	FALSE	FALSE	0
cg09775918	9	46844296	LOC103908605	0.912281	0	0.887719	0	FALSE	FALSE	0
cg09781635	X	100872594	ARMCX6;ARMCX6	0.863158	0	0.74386	0.000393093	TRUE	FALSE	0
cg09786233	X	62571228	SPIN4	0.842105	0	0.747368	0.000355578	FALSE	FALSE	0
cg09805660	X	118340202		0.87193	0	0.926316	2.50634e-06	FALSE	FALSE	0
cg09834142	X	64255215		0.857895	0	0.792982	7.1125e-05	FALSE	FALSE	0
cg09843519	5	125931316	ALDH7A1;ALDH7A1;ALDH7A1	0.854386	0	0.803509	4.23294e-05	FALSE	FALSE	0
cg09853393	X	67995409		0.868421	0	0.889474	0	FALSE	FALSE	0
cg09863225	X	48335010	FTSJ1;FTSJ1;FTSJ1	0.877193	0	0.742105	0.000412963	FALSE	FALSE	0
cg09868328	X	28604501	IL1RAPL1	0.866667	0	0.75614	0.000273778	FALSE	FALSE	0
cg09868337	X	153686720	PLXNA3;PLXNA3	0.84386	0	0.682456	0.00172809	FALSE	FALSE	0
cg09869015	16	461785	DECR2	0.845614	0	0.784211	0.00010313	FALSE	FALSE	0
cg09879385	X	130838253	FIRRE	0.870175	0	0.810526	2.79303e-05	TRUE	FALSE	0
cg09885922	X	40401622		0.84386	0	0.845614	0	FALSE	FALSE	0
cg09890269	X	51239014	NUDT11	0.835088	0	0.777193	0.000135032	FALSE	FALSE	0
cg09896612	6	134956466		0.850877	0	0.82807	4.73137e-06	FALSE	FALSE	0
cg09898573	Y	14100824		0.868421	0	0.717544	0.000783412	TRUE	FALSE	0
cg09904973	X	53110285	TSPYL2	0.840351	0	0.738596	0.000455042	FALSE	FALSE	0
cg09908042	15	102025217	PCSK6;PCSK6;PCSK6;PCSK6;PCSK6;PCSK6;PCSK6;PCSK6	0.9	0	0.833333	5.45502e-07	TRUE	FALSE	0
cg09912589	X	112067795	AMOT;AMOT	0.861404	0	0.822807	1.006e-05	FALSE	FALSE	0
cg09916840	16	87248612		0.840351	0	0.757895	0.000259311	TRUE	FALSE	0
cg09933065	X	153599621	FLNA;FLNA	0.850877	0	0.782456	0.000110543	FALSE	FALSE	0
cg09950034	X	122994069	XIAP;XIAP	0.903509	0	0.8	5.08914e-05	FALSE	FALSE	0
cg09965404	X	46404957	ZNF674;LOC401588;ZNF674	0.9	0	0.747368	0.000355578	TRUE	FALSE	0
cg09966745	X	71934213	PHKA1;PHKA1	0.912281	0	0.792982	7.1125e-05	TRUE	FALSE	0
cg09979523	20	25071315		0.85614	0	0.675439	0.00199731	FALSE	FALSE	0
cg09981999	X	53120031		0.854386	0	0.864912	0	FALSE	FALSE	0
cg09985075	2	86743517	CHMP3;CHMP3;CHMP3;CHMP3;RNF103-CHMP3	0.850877	0	0.738596	0.000455042	FALSE	FALSE	0
cg09985794	3	184374361		0.854386	0	0.821053	1.21192e-05	TRUE	FALSE	0
cg09990582	X	102941884	MORF4L2;MORF4L2;MORF4L2;MORF4L2;MORF4L2;MORF4L2;MORF4L2;MORF4L2;MORF4L2;MORF4L2;MORF4L2;MORF4L2;MORF4L2;MORF4L2;MORF4L2;MORF4L2	0.887719	0	0.817544	1.67023e-05	FALSE	FALSE	0
cg09990735	X	24579010	PCYT1B;PCYT1B;PCYT1B	0.868421	0	0.873684	0	FALSE	FALSE	0
cg09991056	X	107682966	COL4A5;COL4A5;COL4A6;COL4A6;COL4A5	0.885965	0	0.775439	0.000143992	TRUE	FALSE	0
cg09998033	7	158218633	PTPRN2;PTPRN2;PTPRN2	0.836842	0	0.810526	2.79303e-05	FALSE	TRUE	0
cg09998474	X	30907439	MAP3K7IP3;MAP3K7IP3	0.859649	0	0.696491	0.0012776	FALSE	FALSE	0
cg09999381	3	53069292	SFMBT1	0.850877	0	0.657895	0.00282231	FALSE	FALSE	0
cg10009003	X	56589792	UBQLN2	0.842105	0	0.777193	0.000135032	FALSE	FALSE	0
cg10022689	X	149702904		0.854386	0	0.817544	1.67023e-05	FALSE	FALSE	0
cg10025714	1	149150959		0.836842	0	0.549123	0.0163922	FALSE	FALSE	0
cg10039267	X	39960821	BCOR;BCOR	0.901754	0	0.863158	0	TRUE	FALSE	0
cg10050962	X	135579498	HTATSF1;HTATSF1;HTATSF1	0.870175	0	0.738596	0.000455042	TRUE	FALSE	0
cg10051493	16	1939295		0.868421	0	0.92807	2.82666e-06	TRUE	FALSE	0
cg10052908	6	74063522	DPPA5	0.908772	0	0.349123	0.143204	FALSE	FALSE	0
cg10054049	X	135578655	HTATSF1;HTATSF1	0.835088	0	0.701754	0.00113548	TRUE	FALSE	0
cg10057098	1	39991426	LOC728448;BMP8A	0.849123	0	0.882456	0	FALSE	FALSE	0
cg10060875	16	3285498	ZNF200;ZNF200;ZNF200;ZNF200;ZNF200;ZNF200	0.850877	0	0.836842	0	FALSE	FALSE	0
cg10062460	1	213071444	FLVCR1	0.847368	0	0.759649	0.00024543	TRUE	FALSE	0
cg10067677	X	47343176	LINC01560;ZNF41;ZNF41	0.842105	0	0.752632	0.000304546	TRUE	FALSE	0
cg10073247	15	52535947	MYO5C	0.873684	0	0.857895	0	FALSE	FALSE	0
cg10088372	X	133507354	PHF6;PHF6;PHF6;PHF6;PHF6;PHF6	0.878947	0	0.687719	0.00154617	TRUE	FALSE	0
cg10090585	X	130037302	ENOX2;ENOX2	0.870175	0	0.747368	0.000355578	FALSE	FALSE	0
cg10092770	20	61668397	NCRNA00029	0.840351	0	0.545614	0.0172008	FALSE	FALSE	0
cg10105294	9	44402430	LOC103908605	0.847368	0	0.896491	0	FALSE	FALSE	0
cg10107975	X	33744556		0.875439	0	0.74386	0.000393093	FALSE	FALSE	0
cg10135178	15	28834933		0.854386	0	0.798246	5.5546e-05	FALSE	FALSE	0
cg10140190	6	31588707	BAT2	0.868421	0	0.792982	7.1125e-05	FALSE	FALSE	0
cg10145319	11	66489591	SPTBN2	0.85614	0	0.598246	0.00794093	FALSE	FALSE	0
cg10146330	22	50482250	TTLL8	0.866667	0	0.896491	0	TRUE	FALSE	0
cg10146853	X	148628940	CXorf40A;CXorf40A;CXorf40A;CXorf40A	0.840351	0	0.819298	1.4331e-05	FALSE	FALSE	0
cg10147634	1	161423889		0.908772	0	0.942105	5.08699e-06	FALSE	FALSE	0
cg10155995	16	2246657	CASKIN1	0.835088	0	0.696491	0.0012776	FALSE	FALSE	0
cg10169915	X	69417166	DGAT2L6	0.840351	0	0.719298	0.000750442	FALSE	FALSE	0
cg10174816	X	134478126	ZNF449;ZNF75D	0.875439	0	0.805263	3.84027e-05	TRUE	FALSE	0
cg10197336	8	2034467	MYOM2	0.838596	0	0.682456	0.00172809	FALSE	FALSE	0
cg10202874	16	32165225	HERC2P4	0.838596	0	0.752632	0.000304546	FALSE	FALSE	0
cg10204216	22	48705943		0.873684	0	0.524561	0.022753	FALSE	FALSE	0
cg10209431	12	68064880		0.857895	0	0.852632	0	FALSE	FALSE	0
cg10213302	Y	2802975	ZFY;ZFY;ZFY	0.868421	0	0.657895	0.00282231	TRUE	FALSE	0
cg10214576	7	135347238	C7orf73;C7orf73	0.861404	0	0.603509	0.00730263	FALSE	FALSE	0
cg10219156	3	8700802		0.861404	0	0.719298	0.000750442	FALSE	FALSE	0
cg10232733	X	123094509	LOC101928402;STAG2;STAG2;STAG2;STAG2;STAG2;STAG2	0.875439	0	0.8	5.08914e-05	FALSE	FALSE	0
cg10256662	X	133594827	HPRT1	0.870175	0	0.740351	0.000433605	TRUE	FALSE	0
cg10262441	X	18415375		0.868421	0	0.835088	0	FALSE	FALSE	0
cg10265536	9	77503686	TRPM6;TRPM6;TRPM6	0.861404	0	0.845614	0	FALSE	FALSE	0
cg10274682	19	6496041	TUBB4;MIR220B	0.864912	0	0.82807	4.73137e-06	FALSE	FALSE	0
cg10274815	X	68048015	EFNB1	0.857895	0	0.745614	0.000373971	TRUE	FALSE	0
cg10275056	X	153029223	PLXNB3;PLXNB3	0.835088	0	0.880702	0	FALSE	FALSE	0
cg10290730	X	152801187	ATP2B3;ATP2B3	0.849123	0	0.845614	0	FALSE	FALSE	0
cg10299852	6	5766478	FARS2	0.87193	0	0.838596	0	TRUE	FALSE	0
cg10306192	11	102576374	MMP27	0.894737	0	0.850877	0	FALSE	FALSE	0
cg10307051	10	34345346		0.84386	0	0.810526	2.79303e-05	FALSE	FALSE	0
cg10315562	X	149533878		0.864912	0	0.726316	0.000629407	TRUE	FALSE	0
cg10317314	12	31272114		0.891228	0	0.938596	4.57515e-06	FALSE	FALSE	0
cg10318351	X	54556330	GNL3L	0.847368	0	0.707018	0.00100637	TRUE	FALSE	0
cg10356429	X	64627572		0.842105	0	0.726316	0.000629407	FALSE	FALSE	0
cg10380506	5	61602054	KIF2A;KIF2A;KIF2A;KIF2A;KIF2A;KIF2A;KIF2A;KIF2A	0.85614	0	0.792982	7.1125e-05	FALSE	FALSE	0
cg10389436	X	26210406	MAGEB6	0.885965	0	0.849123	0	FALSE	FALSE	0
cg10395519	6	151412304	MTHFD1L	0.864912	0	0.840351	0	FALSE	TRUE	0
cg10400341	X	72787081	CHIC1;CHIC1	0.875439	0	0.907018	0	FALSE	FALSE	0
cg10407245	X	48595753		0.845614	0	0.822807	1.006e-05	TRUE	FALSE	0
cg10409680	6	31239320	HLA-C	0.882456	0	0.85614	0	FALSE	TRUE	0
cg10418630	X	132547691	GPC4	0.836842	0	0.766667	0.000195408	FALSE	FALSE	0
cg10421691	X	45241425		0.894737	0	0.864912	0	FALSE	FALSE	0
cg10422744	Y	16632438		0.894737	0	0.805263	3.84027e-05	TRUE	FALSE	0
cg10430352	2	46409434	PRKCE	0.882456	0	0.854386	0	FALSE	FALSE	0
cg10433168	X	54578630	GNL3L;GNL3L	0.87193	0	0.852632	0	FALSE	FALSE	0
cg10434707	2	208394288	CREB1;CREB1	0.836842	0	0.707018	0.00100637	FALSE	FALSE	0
cg10452588	6	32546743	HLA-DRB1	0.85614	0	0.863158	0	TRUE	FALSE	0
cg10459341	4	7717186	SORCS2	0.840351	0	0.803509	4.23294e-05	TRUE	FALSE	0
cg10460554	X	102565976	BEX2;BEX2;BEX2;BEX2	0.852632	0	0.719298	0.000750442	FALSE	FALSE	0
cg10476550	X	48596210		0.889474	0	0.784211	0.00010313	FALSE	FALSE	0
cg10482057	6	24583614	KIAA0319;KIAA0319;KIAA0319;KIAA0319;KIAA0319	0.845614	0	0.780702	0.000118322	FALSE	TRUE	0
cg10482495	X	71351314	NHSL2;RGAG4	0.84386	0	0.849123	0	TRUE	FALSE	0
cg10490473	21	15487742	LIPI	0.838596	0	0.84386	0	FALSE	TRUE	0
cg10499451	19	39579059	PAPL	0.859649	0	0.792982	7.1125e-05	TRUE	FALSE	0
cg10501443	X	114468791	LRCH2	0.873684	0	0.82807	4.73137e-06	FALSE	FALSE	0
cg10509982	X	69502031	RAB41	0.836842	0	0.764912	0.000207123	FALSE	FALSE	0
cg10512285	X	154493754	RAB39B;RAB39B	0.854386	0	0.826316	6.37252e-06	FALSE	FALSE	0
cg10513418	X	100805297	ARMCX1	0.896491	0	0.868421	0	FALSE	FALSE	0
cg10523679	1	76189770	ACADM;ACADM	0.842105	0	0.757895	0.000259311	FALSE	TRUE	0
cg10538243	X	152910068	DUSP9	0.850877	0	0.784211	0.00010313	FALSE	FALSE	0
cg10563813	X	71695754	HDAC8;HDAC8;HDAC8;HDAC8;HDAC8	0.861404	0	0.833333	5.45502e-07	TRUE	FALSE	0
cg10576499	2	80101315	CTNNA2;CTNNA2	0.901754	0	0.722807	0.000687814	FALSE	FALSE	0
cg10578777	12	7781093		0.840351	0	0.85614	0	FALSE	TRUE	0
cg10590019	X	25225048		0.838596	0	0.835088	0	FALSE	FALSE	0
cg10591825	19	12551937	ZNF443	0.850877	0	0.729825	0.000574995	FALSE	TRUE	0
cg10596483	8	143751796	JRK;JRK	0.859649	0	0.810526	2.79303e-05	TRUE	TRUE	0
cg10605357	10	115439499	CASP7;CASP7;CASP7;CASP7;CASP7;CASP7;CASP7;CASP7;CASP7;CASP7	0.840351	0	0.635088	0.00429089	FALSE	FALSE	0
cg10609677	17	41278573	BRCA1;NBR2;BRCA1;BRCA1;BRCA1;BRCA1	0.884211	0	0.842105	0	FALSE	FALSE	0
cg10627583	X	153562001		0.854386	0	0.898246	0	FALSE	FALSE	0
cg10631902	5	14652156		0.838596	0	0.742105	0.000412963	FALSE	TRUE	0
cg10632144	13	50252564	EBPL	0.901754	0	0.824561	8.14662e-06	FALSE	FALSE	0
cg10632656	4	69435593	UGT2B15;UGT2B17	0.836842	0	0.717544	0.000783412	TRUE	FALSE	0
cg10633576	13	112823573		0.852632	0	0.712281	0.000889312	FALSE	FALSE	0
cg10636054	15	40330586	SRP14	0.835088	0	0.821053	1.21192e-05	FALSE	TRUE	0
cg10646633	19	44598471	ZNF224	0.861404	0	0.857895	0	FALSE	FALSE	0
cg10651583	12	57941069	DCTN2	0.85614	0	0.726316	0.000629407	FALSE	FALSE	0
cg10656643	8	39854061	IDO2	0.912281	0	0.854386	0	FALSE	FALSE	0
cg10661558	21	15443159		0.87193	0	0.735088	0.000500396	FALSE	FALSE	0
cg10676559	X	107407743	COL4A6;COL4A6;COL4A6;COL4A6;COL4A6	0.873684	0	0.821053	1.21192e-05	FALSE	FALSE	0
cg10678429	5	143863696		0.863158	0	0.764912	0.000207123	TRUE	FALSE	0
cg10698654	6	32795582	TAP2;TAP2	0.84386	0	0.698246	0.00122872	FALSE	FALSE	0
cg10701168	17	26799509	SLC13A2;SLC13A2;SLC13A2;SLC13A2	0.891228	0	0.708772	0.000966054	FALSE	FALSE	0
cg10709704	X	47518846	LOC100133957;UXT;LOC100133957;UXT	0.868421	0	0.791228	7.68918e-05	TRUE	FALSE	0
cg10712578	8	96619989		0.894737	0	0.768421	0.000184191	TRUE	FALSE	0
cg10720577	X	132549625	GPC4	0.849123	0	0.782456	0.000110543	FALSE	FALSE	0
cg10721440	X	108976619	ACSL4;ACSL4;ACSL4;ACSL4	0.892982	0	0.780702	0.000118322	TRUE	FALSE	0
cg10729169	X	69664722	DLG3;DLG3	0.847368	0	0.775439	0.000143992	FALSE	FALSE	0
cg10736404	2	62115920	CCT4	0.85614	0	0.661404	0.00263834	FALSE	FALSE	0
cg10744079	14	76819370		0.885965	0	0.838596	0	FALSE	FALSE	0
cg10750253	X	153063973		0.891228	0	0.889474	0	FALSE	FALSE	0
cg10758779	X	47341842	LINC01560;ZNF41;ZNF41	0.875439	0	0.831579	1.82368e-06	TRUE	FALSE	0
cg10767295	X	37004512		0.910526	0	0.857895	0	FALSE	FALSE	0
cg10794473	X	63006350	MIR1468	0.868421	0	0.850877	0	FALSE	FALSE	0
cg10796679	12	112451033	ERP29;ERP29;TMEM116	0.912281	0	0.752632	0.000304546	FALSE	FALSE	0
cg10797813	6	33377848	PHF1;PHF1;PHF1	0.868421	0	0.84386	0	FALSE	FALSE	0
cg10801213	X	70150722	SLC7A3;SLC7A3	0.884211	0	0.708772	0.000966054	FALSE	FALSE	0
cg10818284	X	49056605	SYP	0.850877	0	0.750877	0.000320886	TRUE	FALSE	0
cg10818676	1	167098094	DUSP27	0.861404	0	0.708772	0.000966054	FALSE	FALSE	0
cg10821050	7	155603913	SHH	0.859649	0	0.821053	1.21192e-05	FALSE	FALSE	0
cg10822242	13	61157457		0.850877	0	0.62807	0.00485109	FALSE	FALSE	0
cg10827006	X	57022108	SPIN3;SPIN3	0.84386	0	0.736842	0.000477298	TRUE	FALSE	0
cg10848980	X	48931872	PRAF2	0.870175	0	0.675439	0.00199731	FALSE	FALSE	0
cg10854292	12	4647856	RAD51AP1;C12orf4;RAD51AP1	0.852632	0	0.682456	0.00172809	FALSE	FALSE	0
cg10860270	X	77912297	ZCCHC5	0.870175	0	0.824561	8.14662e-06	FALSE	FALSE	0
cg10868293	X	142716477	SLITRK4	0.854386	0	0.810526	2.79303e-05	FALSE	FALSE	0
cg10869159	X	107334786	PSMD10;PSMD10;ATG4A;PSMD10;ATG4A;PSMD10	0.87193	0	0.857895	0	FALSE	FALSE	0
cg10889196	21	43077070		0.840351	0	0.850877	0	FALSE	FALSE	0
cg10889506	7	33149117	RP9	0.870175	0	0.808772	3.12119e-05	FALSE	FALSE	0
cg10891951	3	136442365	STAG1	0.889474	0	0.603509	0.00730263	FALSE	FALSE	0
cg10892068	X	23926133	APOO;APOO;CXorf58;CXorf58;CXorf58;CXorf58	0.850877	0	0.738596	0.000455042	FALSE	FALSE	0
cg10892585	7	64298680	ZNF138	0.840351	0	0.74386	0.000393093	FALSE	FALSE	0
cg10902968	X	37209388	PRRG1;PRRG1	0.838596	0	0.787719	8.93533e-05	FALSE	FALSE	0
cg10905947	21	30392204	RWDD2B	0.838596	0	0.761404	0.000232117	FALSE	FALSE	0
cg10906138	X	46433744	CHST7	0.896491	0	0.722807	0.000687814	FALSE	FALSE	0
cg10910682	X	105724638		0.85614	0	0.721053	0.000718586	FALSE	FALSE	0
cg10914789	X	152909097	DUSP9	0.835088	0	0.722807	0.000687814	FALSE	FALSE	0
cg10915165	18	72077904	LOC101927606	0.884211	0	0.731579	0.000549219	TRUE	FALSE	0
cg10923851	8	1209510		0.836842	0	0.798246	5.5546e-05	TRUE	FALSE	0
cg10926851	5	146253830	PPP2R2B;PPP2R2B;PPP2R2B;PPP2R2B;PPP2R2B;PPP2R2B;PPP2R2B	0.907018	0	0.684211	0.00166562	TRUE	FALSE	0
cg10926857	14	24476559		0.887719	0	0.907018	0	FALSE	TRUE	0
cg10942847	12	118923473		0.850877	0	0.850877	0	FALSE	FALSE	0
cg10949322	10	35379230	CUL2;CUL2	0.859649	0	0.684211	0.00166562	FALSE	FALSE	0
cg10950266	X	100673192	ARMCX4	0.85614	0	0.657895	0.00282231	TRUE	FALSE	0
cg10950413	X	56590097	UBQLN2;UBQLN2	0.877193	0	0.768421	0.000184191	FALSE	FALSE	0
cg10956264	X	128977299	ZDHHC9;ZDHHC9;ZDHHC9	0.889474	0	0.766667	0.000195408	TRUE	FALSE	0
cg10960055	6	28664226		0.878947	0	0.7	0.00118136	FALSE	FALSE	0
cg10963245	2	85645646		0.85614	0	0.801754	4.64892e-05	FALSE	FALSE	0
cg10969465	6	21761486	FLJ22536	0.878947	0	0.833333	5.45502e-07	FALSE	TRUE	0
cg10978884	X	109561384	AMMECR1;AMMECR1;AMMECR1	0.884211	0	0.719298	0.000750442	FALSE	FALSE	0
cg10983111	X	49056686	SYP	0.870175	0	0.757895	0.000259311	TRUE	FALSE	0
cg10987536	X	53711084	HUWE1	0.864912	0	0.733333	0.000524361	TRUE	FALSE	0
cg11005845	X	140271314	LDOC1	0.896491	0	0.801754	4.64892e-05	FALSE	FALSE	0
cg11008123	11	33097335	LOC283267	0.838596	0	0.735088	0.000500396	FALSE	FALSE	0
cg11019069	6	28551028	SCAND3	0.847368	0	0.870175	0	FALSE	FALSE	0
cg11024449	X	70150787	SLC7A3;SLC7A3	0.850877	0	0.714035	0.000852816	TRUE	FALSE	0
cg11031660	14	83852380		0.838596	0	0.866667	0	FALSE	TRUE	0
cg11049305	X	64196751	ZC4H2	0.861404	0	0.821053	1.21192e-05	FALSE	FALSE	0
cg11065634	14	99736978	BCL11B;BCL11B	0.852632	0	0.792982	7.1125e-05	FALSE	FALSE	0
cg11074353	6	153066907		0.875439	0	0.857895	0	TRUE	FALSE	0
cg11077562	8	7630279		0.887719	0	0.901754	0	FALSE	FALSE	0
cg11078994	15	102264765	TARSL2	0.836842	0	0.657895	0.00282231	FALSE	FALSE	0
cg11081925	X	129536117	RBMX2	0.852632	0	0.763158	0.000219354	FALSE	FALSE	0
cg11082424	X	102470047	BEX4;BEX4;BEX4;BEX4	0.849123	0	0.750877	0.000320886	TRUE	FALSE	0
cg11083276	6	24911313	FAM65B	0.847368	0	0.815789	1.92403e-05	FALSE	TRUE	0
cg11090176	X	134847096	CT45A7;CT45A1	0.882456	0	0.884211	0	FALSE	FALSE	0
cg11091196	5	167285540	ODZ2	0.835088	0	0.849123	0	FALSE	TRUE	0
cg11107468	X	63425275	FAM123B	0.912281	0	0.649123	0.00332846	TRUE	FALSE	0
cg11111083	X	47510589	ELK1;ELK1	0.845614	0	0.796491	6.04628e-05	FALSE	FALSE	0
cg11111271	X	118616736		0.852632	0	0.685965	0.00160499	FALSE	FALSE	0
cg11112532	15	45479807	SHF;SHF;SHF;SHF	0.847368	0	0.726316	0.000629407	FALSE	FALSE	0
cg11141652	22	24348549	GSTTP1	0.85614	0	0.835088	0	FALSE	TRUE	0
cg11144103	17	40561514	PTRF	0.852632	0	0.791228	7.68918e-05	TRUE	FALSE	0
cg11144986	12	132935765		0.887719	0	0.717544	0.000783412	FALSE	FALSE	0
cg11148364	15	25434492	SNORD115-11;SNORD115-36;SNORD115-43;SNORD115-29	0.836842	0	0.689474	0.0014891	FALSE	FALSE	0
cg11152528	X	110925015	ALG13;ALG13;ALG13;ALG13;ALG13;ALG13;ALG13;ALG13;ALG13;ALG13;ALG13;ALG13	0.857895	0	0.861404	0	TRUE	FALSE	0
cg11157324	1	48518781		0.907018	0	0.605263	0.00709942	FALSE	FALSE	0
cg11173636	10	65632259		0.907018	0	0.875439	0	TRUE	FALSE	0
cg11184697	X	48755102	PQBP1;PQBP1;TIMM17B;PQBP1;PQBP1;PQBP1;TIMM17B;PQBP1;PQBP1;PQBP1;PQBP1	0.891228	0	0.738596	0.000455042	TRUE	FALSE	0
cg11186637	X	118925725	RPL39	0.887719	0	0.719298	0.000750442	FALSE	FALSE	0
cg11186981	X	150151784	HMGB3;HMGB3	0.912281	0	0.731579	0.000549219	TRUE	FALSE	0
cg11188618	22	29196489	XBP1;XBP1	0.884211	0	0.563158	0.0134589	FALSE	FALSE	0
cg11190082	X	119005710	RNF113A;NDUFA1;RNF113A	0.85614	0	0.705263	0.00104802	TRUE	FALSE	0
cg11204953	9	44402426	LOC103908605	0.892982	0	0.838596	0	FALSE	FALSE	0
cg11212038	17	59940826	BRIP1	0.835088	0	0.784211	0.00010313	FALSE	TRUE	0
cg11214014	1	97991020	DPYD	0.836842	0	0.780702	0.000118322	TRUE	FALSE	0
cg11229977	2	128166007		0.877193	0	0.626316	0.00500009	FALSE	FALSE	0
cg11235152	1	67600687		0.863158	0	0.770175	0.000173456	FALSE	TRUE	0
cg11235426	6	292522	DUSP22;DUSP22	0.864912	0	0.52807	0.0217395	FALSE	TRUE	0
cg11239920	X	150067879	CD99L2;CD99L2;CD99L2;CD99L2;CD99L2	0.852632	0	0.749123	0.000337889	FALSE	FALSE	0
cg11264711	X	67653315	OPHN1	0.857895	0	0.817544	1.67023e-05	TRUE	FALSE	0
cg11275015	X	52685426	SSX7	0.835088	0	0.824561	8.14662e-06	FALSE	FALSE	0
cg11275709	X	53024676	FAM156A;FAM156A;FAM156A;FAM156A;FAM156A;FAM156A;FAM156A;FAM156A;FAM156A	0.884211	0	0.829825	3.21707e-06	TRUE	FALSE	0
cg11278602	6	29760757	HCG4	0.859649	0	0.87193	0	FALSE	FALSE	0
cg11281224	4	60001000		0.887719	0	0.822807	1.006e-05	TRUE	TRUE	0
cg11281249	2	198570061	MARS2	0.870175	0	0.836842	0	FALSE	FALSE	0
cg11281291	X	62975200	ARHGEF9	0.901754	0	0.742105	0.000412963	TRUE	FALSE	0
cg11282840	8	49057154		0.896491	0	0.684211	0.00166562	TRUE	FALSE	0
cg11284736	15	83826708	HDGFRP3	0.854386	0	0.885965	0	FALSE	FALSE	0
cg11287055	21	38630234	DSCR3	0.866667	0	0.782456	0.000110543	FALSE	FALSE	0
cg11295001	17	66938261	ABCA8;ABCA8;ABCA8	0.847368	0	0.831579	1.82368e-06	FALSE	FALSE	0
cg11308211	2	172750783	SLC25A12;SLC25A12	0.894737	0	0.652632	0.0031178	FALSE	FALSE	0
cg11322406	X	114468360	LRCH2	0.852632	0	0.791228	7.68918e-05	FALSE	FALSE	0
cg11329209	X	68724047	FAM155B	0.861404	0	0.631579	0.00456396	TRUE	FALSE	0
cg11331191	X	63446644	ASB12	0.910526	0	0.905263	0	FALSE	FALSE	0
cg11337025	X	106361672	RBM41;RBM41	0.887719	0	0.824561	8.14662e-06	TRUE	FALSE	0
cg11342921	10	112133894		0.857895	0	0.84386	0	FALSE	FALSE	0
cg11344362	X	68130846		0.873684	0	0.857895	0	FALSE	FALSE	0
cg11355730	X	37171295		0.884211	0	0.885965	0	FALSE	FALSE	0
cg11363165	7	76998286	GSAP	0.87193	0	0.857895	0	TRUE	FALSE	0
cg11363849	X	9919806		0.884211	0	0.836842	0	FALSE	FALSE	0
cg11363917	X	153193870		0.910526	0	0.752632	0.000304546	FALSE	FALSE	0
cg11371160	X	153714615	UBL4A	0.861404	0	0.807018	3.46999e-05	TRUE	FALSE	0
cg11376066	X	152110171	ZNF185;ZNF185;ZNF185;ZNF185;ZNF185;ZNF185;ZNF185;ZNF185	0.875439	0	0.717544	0.000783412	FALSE	FALSE	0
cg11394125	2	85501409	TCF7L1	0.912281	0	0.689474	0.0014891	TRUE	FALSE	0
cg11395062	17	14139857	CDRT15	0.87193	0	0.819298	1.4331e-05	FALSE	FALSE	0
cg11401214	1	2785382		0.84386	0	0.852632	0	TRUE	FALSE	0
cg11409998	X	139587372	SOX3	0.854386	0	0.685965	0.00160499	TRUE	FALSE	0
cg11418237	X	82762423	POU3F4	0.875439	0	0.817544	1.67023e-05	FALSE	FALSE	0
cg11418607	15	67323243		0.845614	0	0.768421	0.000184191	TRUE	FALSE	0
cg11420142	8	92570895		0.873684	0	0.835088	0	FALSE	FALSE	0
cg11422327	X	46989141		0.857895	0	0.812281	2.48466e-05	TRUE	FALSE	0
cg11424273	X	69668937	DLG3	0.889474	0	0.857895	0	FALSE	FALSE	0
cg11425580	Y	9928310		0.849123	0	0.67193	0.00214416	FALSE	FALSE	0
cg11429746	4	120373434		0.850877	0	0.835088	0	FALSE	TRUE	0
cg11437784	13	112710823		0.847368	0	0.803509	4.23294e-05	FALSE	FALSE	0
cg11438323	18	45821540		0.842105	0	0.831579	1.82368e-06	TRUE	FALSE	0
cg11441847	X	117861165	IL13RA1	0.849123	0	0.805263	3.84027e-05	FALSE	FALSE	0
cg11443987	X	129811161	ENOX2;ENOX2;ENOX2	0.854386	0	0.831579	1.82368e-06	FALSE	FALSE	0
cg11449070	X	53449647	SMC1A;RIBC1;RIBC1	0.870175	0	0.712281	0.000889312	FALSE	FALSE	0
cg11463903	2	242641003	ING5	0.864912	0	0.629825	0.00470573	FALSE	FALSE	0
cg11465019	X	71689605	HDAC8;HDAC8;HDAC8	0.852632	0	0.738596	0.000455042	TRUE	FALSE	0
cg11479591	X	153362176	MECP2;MECP2	0.854386	0	0.829825	3.21707e-06	FALSE	FALSE	0
cg11494091	17	61959527	GH2;GH2;GH2;GH2	0.861404	0	0.877193	0	FALSE	FALSE	0
cg11509903	X	135580080	HTATSF1;HTATSF1	0.873684	0	0.742105	0.000412963	FALSE	FALSE	0
cg11520843	X	153059894	IDH3G;SSR4;IDH3G;IDH3G;IDH3G	0.835088	0	0.719298	0.000750442	TRUE	FALSE	0
cg11539066	8	1764618	MIR596	0.889474	0	0.885965	0	FALSE	FALSE	0
cg11541881	1	184492097	C1orf21	0.877193	0	0.824561	8.14662e-06	FALSE	FALSE	0
cg11550546	X	137793850	FGF13-AS1;FGF13;FGF13;FGF13;FGF13;FGF13;FGF13	0.892982	0	0.784211	0.00010313	FALSE	FALSE	0
cg11553248	19	23457005		0.861404	0	0.733333	0.000524361	FALSE	FALSE	0
cg11554868	X	54834055	MAGED2;MAGED2;MAGED2;MAGED2	0.847368	0	0.84386	0	FALSE	FALSE	0
cg11565248	X	20284128	RPS6KA3	0.84386	0	0.791228	7.68918e-05	FALSE	FALSE	0
cg11574174	6	31237034	HLA-C	0.852632	0	0.829825	3.21707e-06	TRUE	FALSE	0
cg11578474	6	31161152		0.838596	0	0.826316	6.37252e-06	TRUE	FALSE	0
cg11579907	6	151412213	MTHFD1L	0.850877	0	0.787719	8.93533e-05	FALSE	TRUE	0
cg11583848	X	49042895	PRICKLE3	0.842105	0	0.850877	0	TRUE	FALSE	0
cg11595192	X	40117509		0.859649	0	0.740351	0.000433605	FALSE	FALSE	0
cg11595545	1	111217497	KCNA3;KCNA3	0.863158	0	0.854386	0	FALSE	FALSE	0
cg11601920	12	64680448	C12orf56;C12orf56	0.868421	0	0.680702	0.00179245	TRUE	FALSE	0
cg11602758	X	108976614	ACSL4;ACSL4;ACSL4;ACSL4	0.863158	0	0.77193	0.000163189	TRUE	FALSE	0
cg11604268	2	97001433	NCAPH;NCAPH;NCAPH;NCAPH	0.870175	0	0.729825	0.000574995	FALSE	FALSE	0
cg11608150	5	135415948		0.891228	0	0.873684	0	FALSE	FALSE	0
cg11616438	X	30671316	GK;GK;GK	0.875439	0	0.708772	0.000966054	FALSE	FALSE	0
cg11633473	17	20799714	CCDC144NL	0.850877	0	0.735088	0.000500396	FALSE	TRUE	0
cg11637006	X	19905535	SH3KBP1;SH3KBP1	0.845614	0	0.754386	0.00028885	TRUE	FALSE	0
cg11638117	X	139587335	SOX3	0.85614	0	0.742105	0.000412963	TRUE	FALSE	0
cg11641061	X	102941859	MORF4L2;MORF4L2;MORF4L2;MORF4L2;MORF4L2;MORF4L2;MORF4L2;MORF4L2;MORF4L2;MORF4L2;MORF4L2;MORF4L2;MORF4L2;MORF4L2;MORF4L2;MORF4L2	0.845614	0	0.85614	0	FALSE	FALSE	0
cg11645539	6	110732115	DDO;DDO	0.847368	0	0.747368	0.000355578	TRUE	FALSE	0
cg11647489	X	128977488	ZDHHC9;ZDHHC9	0.847368	0	0.807018	3.46999e-05	FALSE	FALSE	0
cg11648471	X	14891001	MOSPD2;FANCB;FANCB	0.877193	0	0.729825	0.000574995	TRUE	FALSE	0
cg11648996	X	34960814	FAM47B	0.885965	0	0.907018	0	FALSE	FALSE	0
cg11651473	18	77944554	PARD6G	0.861404	0	0.863158	0	TRUE	FALSE	0
cg11653314	X	20285129	RPS6KA3	0.861404	0	0.761404	0.000232117	TRUE	FALSE	0
cg11663554	12	19927029		0.845614	0	0.805263	3.84027e-05	FALSE	FALSE	0
cg11663806	19	20959492		0.882456	0	0.752632	0.000304546	FALSE	TRUE	0
cg11664313	13	72441676	DACH1;DACH1;DACH1	0.877193	0	0.749123	0.000337889	FALSE	FALSE	0
cg11667509	X	153719406	SLC10A3;SLC10A3;SLC10A3	0.838596	0	0.759649	0.00024543	FALSE	FALSE	0
cg11692610	5	176068458	EIF4E1B	0.861404	0	0.814035	2.19525e-05	FALSE	FALSE	0
cg11704979	X	152599450	ZNF275	0.845614	0	0.659649	0.00272906	FALSE	FALSE	0
cg11707352	X	71525415	CITED1;CITED1;CITED1;CITED1	0.864912	0	0.87193	0	FALSE	FALSE	0
cg11708963	19	4639510	TNFAIP8L1;TNFAIP8L1	0.864912	0	0.835088	0	FALSE	FALSE	0
cg11720300	9	37120436	ZCCHC7;ZCCHC7;ZCCHC7;ZCCHC7;ZCCHC7	0.877193	0	0.77193	0.000163189	FALSE	FALSE	0
cg11722878	14	100870826	WDR25;WDR25	0.878947	0	0.826316	6.37252e-06	TRUE	FALSE	0
cg11723923	13	112820997		0.859649	0	0.757895	0.000259311	TRUE	FALSE	0
cg11731845	1	714239	LOC100288069	0.838596	0	0.733333	0.000524361	FALSE	FALSE	0
cg11733135	1	81878937		0.836842	0	0.807018	3.46999e-05	TRUE	FALSE	0
cg11745795	X	103241605		0.842105	0	0.878947	0	FALSE	FALSE	0
cg11763394	2	113992921	PAX8;PAX8;PAX8;PAX8;PAX8;LOC440839;LOC654433	0.861404	0	0.891228	0	TRUE	TRUE	0
cg11766438	X	11782677	MSL3;MSL3;MSL3;MSL3;MSL3	0.854386	0	0.808772	3.12119e-05	FALSE	FALSE	0
cg11766498	21	40817540	SH3BGR;LCA5L	0.875439	0	0.791228	7.68918e-05	FALSE	TRUE	0
cg11779941	X	153606335	EMD	0.857895	0	0.763158	0.000219354	FALSE	FALSE	0
cg11781506	17	13209886		0.864912	0	0.821053	1.21192e-05	TRUE	FALSE	0
cg11786587	5	178208610		0.873684	0	0.710526	0.000927047	TRUE	FALSE	0
cg11791078	5	36273196	RANBP3L;RANBP3L	0.898246	0	0.74386	0.000393093	TRUE	FALSE	0
cg11810837	X	101854276	ARMCX5;ARMCX5;ARMCX5;ARMCX5;ARMCX5;ARMCX5	0.908772	0	0.847368	0	FALSE	FALSE	0
cg11818589	10	134800741		0.864912	0	0.808772	3.12119e-05	TRUE	FALSE	0
cg11820026	11	117696743	FXYD2;FXYD2;FXYD2	0.868421	0	0.85614	0	FALSE	FALSE	0
cg11826549	16	77753719		0.907018	0	0.807018	3.46999e-05	TRUE	FALSE	0
cg11827366	X	152615943	ZNF275	0.868421	0	0.831579	1.82368e-06	FALSE	FALSE	0
cg11837275	14	106015625		0.84386	0	0.82807	4.73137e-06	FALSE	FALSE	0
cg11839979	X	109246372	TMEM164;TMEM164;TMEM164	0.894737	0	0.766667	0.000195408	FALSE	FALSE	0
cg11844537	10	132911103	TCERG1L	0.842105	0	0.638596	0.00403132	TRUE	FALSE	0
cg11851349	X	153603154	FLNA;FLNA	0.898246	0	0.859649	0	FALSE	FALSE	0
cg11859529	X	70150922	SLC7A3;SLC7A3;SLC7A3;SLC7A3	0.854386	0	0.729825	0.000574995	FALSE	FALSE	0
cg11863519	X	153362995	MECP2;MECP2	0.912281	0	0.801754	4.64892e-05	FALSE	FALSE	0
cg11869614	X	30327110	NR0B1	0.854386	0	0.740351	0.000433605	TRUE	FALSE	0
cg11871549	X	117957616	ZCCHC12	0.896491	0	0.710526	0.000927047	FALSE	FALSE	0
cg11893511	19	48759982	CARD8-AS1;CARD8;CARD8	0.852632	0	0.514035	0.0260222	FALSE	FALSE	0
cg11894108	X	153626015	RPL10;RPL10;RPL10;RPL10;RPL10;RPL10	0.87193	0	0.701754	0.00113548	TRUE	FALSE	0
cg11896111	14	66103262	FUT8;FUT8;FUT8;FUT8;FUT8	0.875439	0	0.803509	4.23294e-05	FALSE	FALSE	0
cg11899080	17	64455086	PRKCA	0.840351	0	0.694737	0.00132804	FALSE	FALSE	0
cg11901680	X	48901069	TFE3	0.838596	0	0.75614	0.000273778	TRUE	FALSE	0
cg11902811	X	129473879	SLC25A14;SLC25A14	0.898246	0	0.736842	0.000477298	TRUE	FALSE	0
cg11906884	X	152989902	BCAP31;ABCD1;BCAP31;BCAP31;BCAP31;BCAP31	0.838596	0	0.82807	4.73137e-06	FALSE	FALSE	0
cg11906997	X	135230024	FHL1;FHL1;FHL1;FHL1;FHL1	0.885965	0	0.884211	0	TRUE	FALSE	0
cg11918372	2	48132755	FBXO11;FBXO11;FBXO11;FBXO11;FBXO11;FBXO11	0.854386	0	0.805263	3.84027e-05	FALSE	FALSE	0
cg11931211	12	130822361	PIWIL1;PIWIL1	0.859649	0	0.885965	0	FALSE	FALSE	0
cg11945235	19	52552025	ZNF432;ZNF432	0.847368	0	0.770175	0.000173456	FALSE	TRUE	0
cg11957130	7	105306555	ATXN7L1;ATXN7L1	0.866667	0	0.891228	0	TRUE	FALSE	0
cg11965913	1	205819406	PM20D1	0.840351	0	0.745614	0.000373971	FALSE	TRUE	0
cg11973981	7	16457583	ISPD;ISPD	0.878947	0	0.789474	8.29641e-05	TRUE	FALSE	0
cg11986743	18	29205358	B4GALT6	0.850877	0	0.478947	0.0397056	TRUE	FALSE	0
cg11999399	X	114523955	LUZP4	0.87193	0	0.877193	0	FALSE	FALSE	0
cg12006399	15	84954185		0.889474	0	0.826316	6.37252e-06	FALSE	FALSE	0
cg12008680	21	30671144	BACH1;BACH1	0.873684	0	0.792982	7.1125e-05	FALSE	TRUE	0
cg12014753	20	50384822	ATP9A	0.850877	0	0.807018	3.46999e-05	FALSE	TRUE	0
cg12026625	X	49028165	PLP2	0.885965	0	0.65614	0.00291815	TRUE	FALSE	0
cg12037916	1	64880608		0.847368	0	0.589474	0.00910547	FALSE	FALSE	0
cg12038572	11	58939780	DTX4;DTX4	0.857895	0	0.663158	0.0025501	FALSE	FALSE	0
cg12045080	2	242682283	D2HGDH	0.880702	0	0.864912	0	FALSE	FALSE	0
cg12045126	X	40003547	BCOR;BCOR	0.840351	0	0.850877	0	TRUE	FALSE	0
cg12051064	X	152847462	ATP2B3;ATP2B3	0.838596	0	0.784211	0.00010313	TRUE	FALSE	0
cg12052203	11	66115045	B3GNT1;B3GNT1	0.836842	0	0.670175	0.00222081	FALSE	FALSE	0
cg12054566	X	70752964	OGT;OGT;OGT;BCYRN1;OGT	0.854386	0	0.859649	0	TRUE	FALSE	0
cg12058262	X	152736032	HAUS7	0.87193	0	0.8	5.08914e-05	TRUE	FALSE	0
cg12058840	X	135579744	HTATSF1;HTATSF1;HTATSF1	0.85614	0	0.778947	0.000126481	TRUE	FALSE	0
cg12061216	X	129658061		0.849123	0	0.722807	0.000687814	FALSE	FALSE	0
cg12064134	16	90016061	DEF8;DEF8	0.850877	0	0.815789	1.92403e-05	FALSE	TRUE	0
cg12064213	X	9982520	WWC3	0.840351	0	0.708772	0.000966054	TRUE	FALSE	0
cg12066896	X	19361984	PDHA1;PDHA1;PDHA1;PDHA1	0.887719	0	0.747368	0.000355578	FALSE	FALSE	0
cg12067202	8	105234691	RIMS2;RIMS2;RIMS2;RIMS2	0.847368	0	0.773684	0.000153372	TRUE	FALSE	0
cg12071142	X	10588311	MID1;MID1;MID1	0.863158	0	0.819298	1.4331e-05	FALSE	FALSE	0
cg12074916	X	47863588	SPACA5;ZNF182;ZNF182	0.885965	0	0.780702	0.000118322	TRUE	FALSE	0
cg12076350	6	31275791		0.877193	0	0.650877	0.00322172	FALSE	FALSE	0
cg12087615	12	53070144	KRT1	0.845614	0	0.768421	0.000184191	TRUE	FALSE	0
cg12102398	1	205792512		0.868421	0	0.849123	0	FALSE	FALSE	0
cg12113229	17	71703442		0.866667	0	0.670175	0.00222081	TRUE	FALSE	0
cg12124890	X	41782860	CASK;CASK;CASK	0.864912	0	0.717544	0.000783412	TRUE	FALSE	0
cg12130976	X	57312244	FAAH2	0.884211	0	0.826316	6.37252e-06	FALSE	FALSE	0
cg12137402	X	68836202	EDA;EDA;EDA;EDA;EDA;EDA	0.864912	0	0.724561	0.000658097	TRUE	FALSE	0
cg12143110	17	79146738	LOC388428	0.87193	0	0.815789	1.92403e-05	FALSE	FALSE	0
cg12145026	X	117861636	IL13RA1	0.910526	0	0.754386	0.00028885	FALSE	FALSE	0
cg12152167	X	95939864	DIAPH2;DIAPH2;DIAPH2;DIAPH2	0.898246	0	0.912281	0	FALSE	FALSE	0
cg12156646	11	92615932	FAT3	0.835088	0	0.617544	0.00580234	FALSE	FALSE	0
cg12158214	X	55187822	FAM104B;FAM104B;FAM104B;FAM104B;FAM104B;FAM104B;FAM104B;FAM104B	0.84386	0	0.712281	0.000889312	TRUE	FALSE	0
cg12159023	19	613818	HCN2	0.84386	0	0.833333	5.45502e-07	FALSE	FALSE	0
cg12161182	12	727334	NINJ2	0.84386	0	0.747368	0.000355578	FALSE	FALSE	0
cg12167002	2	242056226	PASK	0.889474	0	0.878947	0	FALSE	FALSE	0
cg12170219	7	1155700	C7orf50;C7orf50;C7orf50	0.852632	0	0.85614	0	FALSE	FALSE	0
cg12176110	X	20159903	EIF1AX;EIF1AX	0.84386	0	0.742105	0.000412963	FALSE	FALSE	0
cg12177207	3	159943101	LOC401097	0.835088	0	0.775439	0.000143992	FALSE	TRUE	0
cg12184120	19	38188083	ZNF607	0.850877	0	0.785965	9.60713e-05	FALSE	FALSE	0
cg12193896	X	103216926	TMSB15B	0.896491	0	0.840351	0	FALSE	FALSE	0
cg12195446	13	110424497	IRS2	0.838596	0	0.715789	0.000817526	TRUE	FALSE	0
cg12199335	X	36459800	RP11-87M18.2	0.845614	0	0.878947	0	FALSE	FALSE	0
cg12204252	X	129244744	ELF4;ELF4	0.864912	0	0.684211	0.00166562	FALSE	FALSE	0
cg12206646	X	153151054		0.873684	0	0.805263	3.84027e-05	TRUE	FALSE	0
cg12213037	1	1666808	SLC35E2	0.887719	0	0.821053	1.21192e-05	TRUE	FALSE	0
cg12217778	X	48367176	PORCN;PORCN;PORCN;PORCN;PORCN	0.882456	0	0.777193	0.000135032	TRUE	FALSE	0
cg12221068	X	53449760	RIBC1;RIBC1;RIBC1;SMC1A;SMC1A	0.866667	0	0.908772	0	FALSE	FALSE	0
cg12221218	X	37707671	DYNLT3	0.907018	0	0.907018	0	FALSE	FALSE	0
cg12223960	6	32063403	TNXB	0.84386	0	0.831579	1.82368e-06	FALSE	FALSE	0
cg12228772	X	62571231	SPIN4	0.882456	0	0.678947	0.00185874	FALSE	FALSE	0
cg12228919	15	44955936	SPG11;SPG11	0.866667	0	0.87193	0	FALSE	TRUE	0
cg12234996	X	53254760	KDM5C;KDM5C	0.836842	0	0.757895	0.000259311	FALSE	FALSE	0
cg12240569	5	79525568	SERINC5;SERINC5;SERINC5;SERINC5;SERINC5	0.864912	0	0.882456	0	TRUE	FALSE	0
cg12255092	X	118110251	LONRF3;LONRF3;LONRF3;LONRF3	0.908772	0	0.747368	0.000355578	TRUE	FALSE	0
cg12259892	18	56963742	CPLX4	0.849123	0	0.715789	0.000817526	TRUE	FALSE	0
cg12262617	5	150677795	SLC36A3;SLC36A3	0.854386	0	0.307018	0.200588	TRUE	FALSE	0
cg12263679	X	133941121	FAM122C;FAM122C;FAM122C;FAM122C;FAM122C;FAM122C;FAM122C	0.894737	0	0.801754	4.64892e-05	FALSE	FALSE	0
cg12270520	8	146023939	ZNF517	0.9	0	0.670175	0.00222081	FALSE	FALSE	0
cg12272236	X	146271353	MIR513C	0.835088	0	0.840351	0	FALSE	FALSE	0
cg12277627	X	129245225	ELF4;ELF4	0.857895	0	0.785965	9.60713e-05	TRUE	FALSE	0
cg12289509	6	112408513	TUBE1;C6orf225	0.840351	0	0.852632	0	FALSE	FALSE	0
cg12290635	X	119148809		0.866667	0	0.82807	4.73137e-06	FALSE	TRUE	0
cg12291192	X	48397840	TBC1D25	0.847368	0	0.742105	0.000412963	TRUE	FALSE	0
cg12292165	12	69726854		0.892982	0	0.903509	0	FALSE	FALSE	0
cg12307373	11	103305609	DYNC2H1;DYNC2H1	0.845614	0	0.8	5.08914e-05	TRUE	FALSE	0
cg12316098	19	17115116	CPAMD8	0.870175	0	0.875439	0	FALSE	FALSE	0
cg12323723	X	136656581		0.84386	0	0.784211	0.00010313	FALSE	FALSE	0
cg12365226	X	69670521	DLG3	0.852632	0	0.77193	0.000163189	FALSE	FALSE	0
cg12370933	12	131896844		0.891228	0	0.833333	5.45502e-07	TRUE	FALSE	0
cg12377327	X	48937697	WDR45;WDR45	0.905263	0	0.885965	0	TRUE	FALSE	0
cg12384758	10	76642997	KAT6B;KAT6B;KAT6B	0.87193	0	0.878947	0	TRUE	FALSE	0
cg12386614	1	33608053		0.87193	0	0.866667	0	TRUE	FALSE	0
cg12391576	6	33037662	HLA-DPA1	0.861404	0	0.85614	0	TRUE	FALSE	0
cg12395823	5	1196154		0.882456	0	0.829825	3.21707e-06	FALSE	FALSE	0
cg12399904	X	74742939	ZDHHC15;ZDHHC15;ZDHHC15;ZDHHC15;ZDHHC15;ZDHHC15	0.835088	0	0.747368	0.000355578	FALSE	FALSE	0
cg12406683	1	146548032		0.875439	0	0.792982	7.1125e-05	TRUE	FALSE	0
cg12417438	X	71401510	PIN4;PIN4;PIN4	0.889474	0	0.826316	6.37252e-06	TRUE	FALSE	0
cg12419462	X	25031919	ARX	0.885965	0	0.687719	0.00154617	TRUE	FALSE	0
cg12419862	22	24373484	LOC391322	0.907018	0	0.736842	0.000477298	FALSE	TRUE	0
cg12452512	X	100740439	ARMCX4	0.87193	0	0.764912	0.000207123	TRUE	FALSE	0
cg12453183	10	44321795		0.847368	0	0.654386	0.00301662	FALSE	FALSE	0
cg12454975	X	103356930	MCART6;ZCCHC18;ZCCHC18	0.850877	0	0.770175	0.000173456	TRUE	FALSE	0
cg12468189	X	153046767	SRPK3;SRPK3;SRPK3	0.896491	0	0.819298	1.4331e-05	FALSE	FALSE	0
cg12468496	8	93156539		0.840351	0	0.810526	2.79303e-05	FALSE	FALSE	0
cg12469471	X	153151235		0.859649	0	0.817544	1.67023e-05	FALSE	FALSE	0
cg12472203	X	54071365	PHF8	0.847368	0	0.77193	0.000163189	FALSE	FALSE	0
cg12472218	X	17755211	SCML1;SCML1;SCML1;SCML1	0.887719	0	0.710526	0.000927047	TRUE	FALSE	0
cg12475092	5	84934437		0.891228	0	0.680702	0.00179245	TRUE	FALSE	0
cg12481479	X	38421436	TSPAN7	0.870175	0	0.749123	0.000337889	FALSE	FALSE	0
cg12501871	X	37208277	PRRG1;PRRG1	0.845614	0	0.738596	0.000455042	TRUE	FALSE	0
cg12515684	10	8203261		0.845614	0	0.847368	0	FALSE	TRUE	0
cg12517167	X	135962887	RBMX;RBMX;RBMX;RBMX;RBMX;RBMX;SNORD61	0.847368	0	0.773684	0.000153372	TRUE	FALSE	0
cg12521790	X	49056693	SYP	0.850877	0	0.815789	1.92403e-05	TRUE	FALSE	0
cg12523974	X	153084761	PDZD4	0.84386	0	0.663158	0.0025501	FALSE	FALSE	0
cg12526470	11	76512430		0.835088	0	0.735088	0.000500396	FALSE	FALSE	0
cg12529161	4	3567445		0.85614	0	0.866667	0	FALSE	FALSE	0
cg12536534	X	153774863	IKBKG;G6PD;G6PD;IKBKG;IKBKG;IKBKG	0.894737	0	0.868421	0	FALSE	FALSE	0
cg12536802	X	114953716		0.884211	0	0.840351	0	FALSE	FALSE	0
cg12550885	X	139015212		0.87193	0	0.822807	1.006e-05	FALSE	FALSE	0
cg12561338	19	12175505	ZNF844	0.868421	0	0.789474	8.29641e-05	FALSE	FALSE	0
cg12562822	5	1219873	SLC6A19	0.884211	0	0.87193	0	FALSE	FALSE	0
cg12578739	11	85522305	SYTL2;SYTL2	0.885965	0	0.850877	0	FALSE	FALSE	0
cg12589297	15	67136155		0.889474	0	0.805263	3.84027e-05	TRUE	FALSE	0
cg12596096	X	119252099		0.854386	0	0.854386	0	FALSE	FALSE	0
cg12609403	X	3762114	LOC389906	0.878947	0	0.863158	0	FALSE	FALSE	0
cg12622895	X	25019611		0.884211	0	0.884211	0	FALSE	FALSE	0
cg12623145	2	97778927	ANKRD36	0.840351	0	0.661404	0.00263834	FALSE	TRUE	0
cg12645284	15	79092878	ADAMTS7	0.849123	0	0.877193	0	FALSE	TRUE	0
cg12646931	5	89770577	MBLAC2;MBLAC2;POLR3G	0.908772	0	0.550877	0.0159996	FALSE	FALSE	0
cg12650780	X	80458049	SH3BGRL;HMGN5	0.859649	0	0.666667	0.00238082	TRUE	FALSE	0
cg12653105	X	49028299	PLP2;PLP2	0.845614	0	0.889474	0	TRUE	FALSE	0
cg12653510	X	73071112	XIST	0.859649	0	0.808772	3.12119e-05	TRUE	FALSE	0
cg12654155	4	185238627		0.880702	0	0.691228	0.00143375	FALSE	TRUE	0
cg12667521	19	29218732		0.875439	0	0.845614	0	TRUE	TRUE	0
cg12673701	X	27999602	DCAF8L1	0.901754	0	0.898246	0	FALSE	FALSE	0
cg12674271	X	30766851		0.882456	0	0.9	0	FALSE	FALSE	0
cg12690224	19	54197626	MIR519B;MIR526B	0.891228	0	0.859649	0	FALSE	FALSE	0
cg12691219	X	100878134	ARMCX3;ARMCX3;ARMCX3;ARMCX3;ARMCX3	0.836842	0	0.673684	0.00206967	FALSE	FALSE	0
cg12697186	X	71353459	NHSL2	0.847368	0	0.854386	0	FALSE	FALSE	0
cg12697337	2	90016302		0.842105	0	0.787719	8.93533e-05	FALSE	TRUE	0
cg12702014	1	14055709	PRDM2;PRDM2;PRDM2	0.907018	0	0.884211	0	TRUE	FALSE	0
cg12705389	X	137794264	FGF13;FGF13-AS1;FGF13;FGF13;FGF13;FGF13;FGF13	0.873684	0	0.778947	0.000126481	FALSE	FALSE	0
cg12707233	X	54384964	WNK3;WNK3	0.863158	0	0.789474	8.29641e-05	TRUE	FALSE	0
cg12708955	2	85489314	TCF7L1	0.854386	0	0.85614	0	FALSE	FALSE	0
cg12709057	X	107334815	PSMD10;PSMD10;ATG4A;PSMD10;ATG4A;PSMD10	0.884211	0	0.736842	0.000477298	TRUE	FALSE	0
cg12716207	X	13513872		0.859649	0	0.682456	0.00172809	FALSE	FALSE	0
cg12716696	X	118533437	SLC25A43	0.887719	0	0.74386	0.000393093	TRUE	FALSE	0
cg12719417	16	50228564	PAPD5;PAPD5	0.836842	0	0.666667	0.00238082	FALSE	FALSE	0
cg12722058	15	23086394	NIPA1;NIPA1	0.880702	0	0.861404	0	FALSE	FALSE	0
[truncated: 24,577 more rows]

## Sheet: BRvsEP_BH
Supplementary Table S4. Characteristics of the CpGs that surpassed the Benjamini-Hochberg level of significance for the degree of correlation between brain and peripheral tissues.
	chr	MAPINFO	Gene_Name	rho_brain_buccal	p_rho_brain_buccal	rho_brain_buccal_adj	p_rho_brain_buccal_adj	SNP_flag	mQTL_flag	BH
cg00007215	17	21416281		0.845614	0	0.847368	0	FALSE	FALSE	0
cg00011200	X	48380234	EBP;EBP	0.847368	0	0.785965	9.60713e-05	TRUE	FALSE	0
cg00016522	X	149737876	MTM1	0.835088	0	0.796491	6.04628e-05	FALSE	FALSE	0
cg00017110	X	150123346		0.847368	0	0.833333	5.45502e-07	FALSE	FALSE	0
cg00018261	X	117957689	ZCCHC12	0.905263	0	0.784211	0.00010313	TRUE	FALSE	0
cg00031303	3	195681400		0.912281	0	0.87193	0	FALSE	TRUE	0
cg00032666	X	149613398	MAMLD1	0.835088	0	0.777193	0.000135032	FALSE	FALSE	0
cg00042902	X	100663564	RPL36A-HNRNPH2;RPL36A-HNRNPH2;HNRNPH2;HNRNPH2;GLA	0.852632	0	0.75614	0.000273778	TRUE	FALSE	0
cg00045070	1	55504649	PCSK9	0.854386	0	0.847368	0	TRUE	FALSE	0
cg00046099	X	54556443	GNL3L	0.840351	0	0.836842	0	TRUE	FALSE	0
cg00079479	X	133119778	GPC3;GPC3;GPC3;GPC3	0.835088	0	0.710526	0.000927047	FALSE	FALSE	0
cg00091810	X	153632032	DNASE1L1;DNASE1L1;DNASE1L1;DNASE1L1;DNASE1L1	0.880702	0	0.794737	6.56523e-05	FALSE	FALSE	0
cg00108056	X	153627317	RPL10;RPL10;SNORA70	0.85614	0	0.766667	0.000195408	FALSE	FALSE	0
cg00121626	Y	21664296	BCORL2	0.861404	0	0.87193	0	FALSE	FALSE	0
cg00122779	6	32033006	TNXB	0.875439	0	0.833333	5.45502e-07	TRUE	FALSE	0
cg00124993	5	135416412	MIR886	0.898246	0	0.878947	0	TRUE	FALSE	0
cg00129074	X	23093824	PTCHD1-AS	0.836842	0	0.873684	0	FALSE	FALSE	0
cg00130498	X	129192712		0.868421	0	0.770175	0.000173456	FALSE	FALSE	0
cg00137195	9	67031868	LOC286297	0.864912	0	0.877193	0	TRUE	FALSE	0
cg00139317	X	24665544	PCYT1B;PCYT1B;PCYT1B	0.840351	0	0.750877	0.000320886	TRUE	FALSE	0
cg00142683	X	118708623	UBE2A;UBE2A;UBE2A;UBE2A	0.907018	0	0.729825	0.000574995	FALSE	FALSE	0
cg00145958	14	45723370	MIS18BP1	0.884211	0	0.819298	1.4331e-05	FALSE	FALSE	0
cg00149117	X	71769393	HDAC8;HDAC8;HDAC8;HDAC8;HDAC8	0.868421	0	0.782456	0.000110543	TRUE	FALSE	0
cg00153622	15	21147039		0.850877	0	0.668421	0.00229968	FALSE	FALSE	0
cg00160777	16	23764590	CHP2	0.880702	0	0.866667	0	FALSE	TRUE	0
cg00179598	X	38078359	SRPX;SRPX;SRPX;SRPX	0.845614	0	0.857895	0	FALSE	FALSE	0
cg00189276	6	1410267		0.866667	0	0.864912	0	FALSE	FALSE	0
cg00200463	X	67913573	STARD8;STARD8;STARD8;STARD8	0.840351	0	0.729825	0.000574995	TRUE	FALSE	0
cg00233877	X	128782840	APLN	0.847368	0	0.833333	5.45502e-07	FALSE	FALSE	0
cg00235887	X	9430465	TBL1X;TBL1X;TBL1X	0.861404	0	0.908772	0	FALSE	FALSE	0
cg00238052	X	101380291	TCEAL2	0.847368	0	0.814035	2.19525e-05	FALSE	FALSE	0
cg00245012	X	57148068	SPIN2B;SPIN2B;SPIN2B	0.85614	0	0.708772	0.000966054	TRUE	FALSE	0
cg00247094	17	77922972	TBC1D16	0.87193	0	0.910526	0	TRUE	FALSE	0
cg00256329	17	724374	NXN	0.84386	0	0.801754	4.64892e-05	FALSE	FALSE	0
cg00257859	X	9815644	SHROOM2	0.85614	0	0.840351	0	FALSE	FALSE	0
cg00267352	X	149613734	MAMLD1;MAMLD1	0.847368	0	0.863158	0	TRUE	FALSE	0
cg00268965	10	46321386	AGAP4;AGAP4;AGAP4	0.850877	0	0.854386	0	FALSE	FALSE	0
cg00270799	8	8580453		0.838596	0	0.819298	1.4331e-05	FALSE	FALSE	0
cg00279662	5	54989614	SLC38A9;SLC38A9;SLC38A9;SLC38A9;SLC38A9	0.866667	0	0.807018	3.46999e-05	FALSE	FALSE	0
cg00281837	2	231855218		0.836842	0	0.696491	0.0012776	FALSE	FALSE	0
cg00290627	7	63217221		0.836842	0	0.861404	0	FALSE	FALSE	0
cg00308816	14	100847617	WDR25;WDR25	0.849123	0	0.792982	7.1125e-05	TRUE	FALSE	0
cg00318166	4	190230730		0.870175	0	0.631579	0.00456396	TRUE	FALSE	0
cg00322261	11	82115128		0.845614	0	0.733333	0.000524361	FALSE	TRUE	0
cg00360365	X	54556536	GNL3L	0.842105	0	0.675439	0.00199731	FALSE	FALSE	0
cg00368230	X	152865160	FAM58A;FAM58A	0.868421	0	0.773684	0.000153372	FALSE	FALSE	0
cg00379528	12	125350693		0.889474	0	0.801754	4.64892e-05	FALSE	FALSE	0
cg00387940	X	149742400	MTM1	0.863158	0	0.842105	0	FALSE	TRUE	0
cg00391044	X	136510091		0.845614	0	0.763158	0.000219354	FALSE	FALSE	0
cg00413734	7	44145910	AEBP1	0.857895	0	0.796491	6.04628e-05	TRUE	FALSE	0
cg00423482	8	37946284		0.863158	0	0.650877	0.00322172	TRUE	FALSE	0
cg00436317	X	142722473	SLITRK4;SLITRK4;SLITRK4	0.910526	0	0.826316	6.37252e-06	FALSE	FALSE	0
cg00455876	Y	9385539		0.875439	0	0.861404	0	FALSE	FALSE	0
cg00457389	X	18372736	SCML2;SCML2	0.859649	0	0.764912	0.000207123	FALSE	FALSE	0
cg00458505	X	17393449	NHS	0.870175	0	0.733333	0.000524361	TRUE	FALSE	0
cg00474373	2	1625268		0.878947	0	0.712281	0.000889312	TRUE	FALSE	0
cg00488012	2	227710	SH3YL1;SH3YL1;SH3YL1;SH3YL1;SH3YL1;SH3YL1;SH3YL1;SH3YL1	0.849123	0	0.605263	0.00709942	FALSE	FALSE	0
cg00525833	1	31983220	LOC284551	0.847368	0	0.682456	0.00172809	FALSE	TRUE	0
cg00532122	4	56274131	TMEM165	0.847368	0	0.798246	5.5546e-05	TRUE	FALSE	0
cg00533202	5	180511822		0.859649	0	0.740351	0.000433605	FALSE	FALSE	0
cg00538420	X	107979988	IRS4	0.857895	0	0.789474	8.29641e-05	FALSE	FALSE	0
cg00566642	1	156825288	NTRK1;INSRR	0.845614	0	0.782456	0.000110543	FALSE	FALSE	0
cg00573203	X	53106360	GPR173	0.842105	0	0.838596	0	FALSE	FALSE	0
cg00573550	7	149701920		0.859649	0	0.884211	0	FALSE	FALSE	0
cg00588198	6	29648452		0.87193	0	0.824561	8.14662e-06	FALSE	FALSE	0
cg00597858	X	51636568	MAGED1;MAGED1;MAGED1	0.852632	0	0.778947	0.000126481	FALSE	FALSE	0
cg00602930	6	158482610	SYNJ2;SYNJ2	0.85614	0	0.836842	0	TRUE	FALSE	0
cg00605060	16	70997857	HYDIN	0.892982	0	0.750877	0.000320886	FALSE	FALSE	0
cg00611101	X	101380608	TCEAL2	0.836842	0	0.82807	4.73137e-06	FALSE	FALSE	0
cg00622384	X	118925635	RPL39	0.849123	0	0.729825	0.000574995	FALSE	FALSE	0
cg00624017	10	135382597	SYCE1;SPRNP1	0.840351	0	0.796491	6.04628e-05	FALSE	FALSE	0
cg00631877	12	94640673	PLXNC1	0.85614	0	0.817544	1.67023e-05	TRUE	FALSE	0
cg00651446	X	101380386	TCEAL2	0.836842	0	0.791228	7.68918e-05	TRUE	FALSE	0
cg00664899	7	130740649	LINC-PINT;LINC-PINT;LINC-PINT;LINC-PINT;LINC-PINT;LINC-PINT;LINC-PINT;LINC-PINT	0.864912	0	0.878947	0	FALSE	FALSE	0
cg00679794	3	186522625	RFC4;RFC4	0.845614	0	0.887719	0	FALSE	FALSE	0
cg00686667	19	55477454	NLRP2;NLRP2;NLRP2;NLRP2	0.877193	0	0.810526	2.79303e-05	FALSE	FALSE	0
cg00690692	X	134305330	CT55;CT55;CT55;CT55	0.875439	0	0.815789	1.92403e-05	FALSE	FALSE	0
cg00702561	9	132458129	PRRX2	0.859649	0	0.575439	0.0112553	TRUE	FALSE	0
cg00713204	16	88016632	BANP;BANP	0.882456	0	0.898246	0	TRUE	FALSE	0
cg00718752	3	46643208		0.912281	0	0.833333	5.45502e-07	TRUE	FALSE	0
cg00727777	8	2337813		0.845614	0	0.74386	0.000393093	FALSE	TRUE	0
cg00735885	X	111874418	LHFPL1	0.842105	0	0.785965	9.60713e-05	TRUE	FALSE	0
cg00739278	7	38351226		0.845614	0	0.678947	0.00185874	FALSE	FALSE	0
cg00745399	19	52839924	ZNF610;ZNF610;ZNF610	0.838596	0	0.689474	0.0014891	FALSE	TRUE	0
cg00753039	10	134969141		0.866667	0	0.857895	0	FALSE	TRUE	0
cg00762997	X	106299502		0.85614	0	0.866667	0	FALSE	FALSE	0
cg00764560	22	42016991	XRCC6;PPPDE2	0.859649	0	0.870175	0	FALSE	FALSE	0
cg00769064	X	136650951	ZIC3	0.889474	0	0.842105	0	FALSE	FALSE	0
cg00781978	X	40506067	CXorf38	0.9	0	0.807018	3.46999e-05	FALSE	FALSE	0
cg00787015	X	40506177	CXorf38	0.889474	0	0.877193	0	FALSE	FALSE	0
cg00793227	7	159314		0.866667	0	0.815789	1.92403e-05	FALSE	FALSE	0
cg00804338	13	114239234	TFDP1;TFDP1	0.835088	0	0.733333	0.000524361	FALSE	FALSE	0
cg00813142	X	23685984	PRDX4	0.835088	0	0.684211	0.00166562	TRUE	FALSE	0
cg00814218	14	37445440	SLC25A21;SLC25A21	0.85614	0	0.896491	0	TRUE	FALSE	0
cg00815214	21	47717953		0.835088	0	0.784211	0.00010313	FALSE	TRUE	0
cg00832270	X	77359535	PGK1	0.84386	0	0.77193	0.000163189	TRUE	FALSE	0
cg00836161	18	48554285		0.894737	0	0.8	5.08914e-05	TRUE	FALSE	0
cg00849191	X	152939154	PNCK;PNCK	0.880702	0	0.792982	7.1125e-05	TRUE	FALSE	0
cg00860380	1	54871988	SSBP3;SSBP3;SSBP3;SSBP3	0.898246	0	0.905263	0	FALSE	FALSE	0
cg00861277	14	70721641		0.842105	0	0.789474	8.29641e-05	FALSE	FALSE	0
cg00864171	11	67383662		0.84386	0	0.787719	8.93533e-05	FALSE	TRUE	0
cg00875852	14	74001118	HEATR4	0.863158	0	0.831579	1.82368e-06	TRUE	TRUE	0
cg00878188	2	106895165		0.852632	0	0.817544	1.67023e-05	FALSE	FALSE	0
cg00888402	17	33772796	SLFN13	0.863158	0	0.708772	0.000966054	TRUE	FALSE	0
cg00895705	X	54384537	WNK3;WNK3	0.898246	0	0.847368	0	FALSE	FALSE	0
cg00896220	17	34639327	CCL4L1;CCL4L2	0.835088	0	0.877193	0	FALSE	FALSE	0
cg00898159	X	48532921		0.857895	0	0.857895	0	FALSE	FALSE	0
cg00910107	17	81032839		0.849123	0	0.92807	2.82666e-06	TRUE	FALSE	0
cg00920314	X	84189177	UBE2DNL	0.877193	0	0.885965	0	FALSE	FALSE	0
cg00926541	X	36982191		0.849123	0	0.750877	0.000320886	FALSE	FALSE	0
cg00927228	X	114953712		0.891228	0	0.866667	0	TRUE	FALSE	0
cg00936342	X	100306566	TRMT2B;TRMT2B;TRMT2B;TRMT2B	0.847368	0	0.785965	9.60713e-05	TRUE	FALSE	0
cg00940232	X	135962391	RBMX;RBMX;RBMX;RBMX;SNORD61	0.857895	0	0.815789	1.92403e-05	TRUE	FALSE	0
cg00948677	X	68113437		0.877193	0	0.775439	0.000143992	FALSE	FALSE	0
cg00985591	8	143695898	ARC	0.898246	0	0.836842	0	FALSE	FALSE	0
cg00988678	X	119005603	RNF113A;NDUFA1;RNF113A	0.840351	0	0.77193	0.000163189	TRUE	FALSE	0
cg00997387	1	233363393	PCNXL2	0.887719	0	0.773684	0.000153372	TRUE	FALSE	0
cg01001468	16	79635425	MAF;MAF	0.838596	0	0.819298	1.4331e-05	FALSE	FALSE	0
cg01027929	7	26241406	HNRNPA2B1;CBX3;CBX3;HNRNPA2B1;CBX3	0.898246	0	0.791228	7.68918e-05	FALSE	TRUE	0
cg01050429	5	72596646		0.884211	0	0.866667	0	FALSE	FALSE	0
cg01052723	9	42366868	ANKRD20A2;ANKRD20A3	0.907018	0	0.894737	0	FALSE	FALSE	0
cg01058588	X	153775683	IKBKG;IKBKG;IKBKG;G6PD;IKBKG;IKBKG;IKBKG;G6PD;G6PD	0.835088	0	0.775439	0.000143992	TRUE	FALSE	0
cg01062318	8	52682368	PXDNL	0.887719	0	0.659649	0.00272906	FALSE	FALSE	0
cg01073976	X	73406663	FTX	0.866667	0	0.792982	7.1125e-05	FALSE	FALSE	0
cg01083397	X	153362990	MECP2;MECP2	0.842105	0	0.685965	0.00160499	FALSE	FALSE	0
cg01099299	2	133016453	NCRNA00164	0.850877	0	0.661404	0.00263834	FALSE	FALSE	0
cg01104131	X	114426686	RBMXL3;LRCH2	0.845614	0	0.842105	0	FALSE	FALSE	0
cg01104348	X	106765576	FRMPD3;FRMPD3-AS1	0.842105	0	0.792982	7.1125e-05	FALSE	FALSE	0
cg01118640	14	52816915		0.9	0	0.85614	0	TRUE	FALSE	0
cg01126087	X	16931048		0.835088	0	0.898246	0	FALSE	FALSE	0
cg01135259	11	1674211	HCCA2	0.889474	0	0.764912	0.000207123	FALSE	TRUE	0
cg01146930	X	134430312	ZNF75D;ZNF75D;ZNF75D	0.84386	0	0.694737	0.00132804	FALSE	FALSE	0
cg01173508	X	110544388	DCX;DCX;DCX;DCX	0.880702	0	0.926316	2.50634e-06	FALSE	FALSE	0
cg01178063	X	69283055	OTUD6A	0.85614	0	0.9	0	FALSE	FALSE	0
cg01181863	3	195395398	SDHAP2	0.903509	0	0.791228	7.68918e-05	FALSE	FALSE	0
cg01191578	X	55020455	PFKFB1;PFKFB1	0.891228	0	0.908772	0	FALSE	FALSE	0
cg01191806	10	81680307	MBL1P	0.9	0	0.877193	0	TRUE	FALSE	0
cg01191832	X	57619327	ZXDB	0.835088	0	0.694737	0.00132804	FALSE	FALSE	0
cg01201914	15	28644585		0.892982	0	0.738596	0.000455042	FALSE	FALSE	0
cg01202451	X	146966342		0.87193	0	0.892982	0	FALSE	FALSE	0
cg01209756	Y	19671414		0.903509	0	0.889474	0	FALSE	FALSE	0
cg01212677	X	24483290	PDK3;PDK3	0.857895	0	0.810526	2.79303e-05	TRUE	FALSE	0
cg01215118	X	152066708		0.840351	0	0.761404	0.000232117	TRUE	FALSE	0
cg01221053	X	39158629		0.847368	0	0.863158	0	FALSE	FALSE	0
cg01223071	11	86472904		0.849123	0	0.852632	0	TRUE	FALSE	0
cg01228510	7	153755533	DPP6;DPP6	0.864912	0	0.791228	7.68918e-05	FALSE	FALSE	0
cg01241775	X	138287234	FGF13;FGF13;FGF13	0.878947	0	0.740351	0.000433605	FALSE	FALSE	0
cg01283806	3	129262076	H1FOO	0.884211	0	0.9	0	TRUE	FALSE	0
cg01294637	17	44636137	ARL17A;ARL17A;ARL17A;ARL17A;ARL17A	0.852632	0	0.792982	7.1125e-05	FALSE	FALSE	0
cg01321830	X	40005822	BCOR;BCOR	0.854386	0	0.817544	1.67023e-05	FALSE	FALSE	0
cg01329836	X	66764464	AR;AR	0.847368	0	0.745614	0.000373971	TRUE	FALSE	0
cg01332299	2	85501998	TCF7L1	0.840351	0	0.759649	0.00024543	TRUE	FALSE	0
cg01335180	1	161576580	HSPA7	0.845614	0	0.833333	5.45502e-07	FALSE	FALSE	0
cg01340089	12	22199200	CMAS;CMAS	0.842105	0	0.831579	1.82368e-06	FALSE	FALSE	0
cg01340520	X	40015196	BCOR;BCOR	-0.863158	0	-0.745614	0.000373971	FALSE	FALSE	0
cg01345087	X	47479175	SYN1;SYN1;SYN1;SYN1	0.85614	0	0.807018	3.46999e-05	TRUE	FALSE	0
cg01348758	X	80457518	SH3BGRL;SH3BGRL;HMGN5	0.842105	0	0.798246	5.5546e-05	FALSE	FALSE	0
cg01348942	X	102755537	RAB40A	0.866667	0	0.822807	1.006e-05	FALSE	FALSE	0
cg01369511	2	70528091	FAM136A	0.882456	0	0.845614	0	FALSE	FALSE	0
cg01383228	X	124336658		0.842105	0	0.822807	1.006e-05	FALSE	FALSE	0
cg01383599	X	25020151		0.835088	0	0.892982	0	FALSE	FALSE	0
cg01392941	X	129244742	ELF4;ELF4	0.847368	0	0.764912	0.000207123	FALSE	FALSE	0
cg01394167	4	9479622		0.859649	0	0.838596	0	TRUE	TRUE	0
cg01397495	2	136496804		0.884211	0	0.703509	0.00109104	TRUE	FALSE	0
cg01404988	X	53449561	SMC1A;RIBC1;SMC1A;RIBC1	0.875439	0	0.814035	2.19525e-05	FALSE	FALSE	0
cg01412404	3	14289162		0.866667	0	0.761404	0.000232117	TRUE	FALSE	0
cg01414268	8	2480911		0.884211	0	0.884211	0	FALSE	FALSE	0
cg01418896	7	153108684		0.910526	0	0.682456	0.00172809	FALSE	TRUE	0
cg01426195	3	39028469		0.868421	0	0.847368	0	FALSE	TRUE	0
cg01427108	3	46484379	LTF;LTF	0.847368	0	0.877193	0	TRUE	FALSE	0
cg01430241	X	153665714	GDI1	0.891228	0	0.833333	5.45502e-07	TRUE	FALSE	0
cg01480550	X	151143526	GABRE	0.885965	0	0.766667	0.000195408	FALSE	FALSE	0
cg01486300	11	71885949		0.84386	0	0.912281	0	TRUE	FALSE	0
cg01494994	2	1062590	SNTG2	0.87193	0	0.615789	0.00597476	FALSE	FALSE	0
cg01497365	X	30671488	GK;GK;GK;GK;GK;GK;GK;GK	0.842105	0	0.680702	0.00179245	FALSE	FALSE	0
cg01501311	X	153200487	NAA10;NAA10;NAA10;NAA10;NAA10;NAA10	0.866667	0	0.787719	8.93533e-05	FALSE	FALSE	0
cg01516881	6	292596	DUSP22	0.880702	0	0.392982	0.0970259	FALSE	TRUE	0
cg01523029	Y	9234365	TSPY4	0.836842	0	0.733333	0.000524361	FALSE	FALSE	0
cg01530162	X	139589424		0.847368	0	0.866667	0	FALSE	FALSE	0
cg01534424	5	139175399	PSD2	0.84386	0	0.845614	0	FALSE	FALSE	0
cg01534758	X	37061627		0.898246	0	0.907018	0	FALSE	FALSE	0
cg01537968	X	99987037	SYTL4;SYTL4;SYTL4	0.850877	0	0.77193	0.000163189	TRUE	FALSE	0
cg01538344	X	100546291	TAF7L;TAF7L;TAF7L	0.863158	0	0.685965	0.00160499	FALSE	FALSE	0
cg01540386	X	39873535		0.877193	0	0.859649	0	FALSE	FALSE	0
cg01540869	13	25116150		0.842105	0	0.763158	0.000219354	FALSE	FALSE	0
cg01543116	X	100184268	XKRX	0.901754	0	0.810526	2.79303e-05	FALSE	FALSE	0
cg01561758	19	52514445		0.882456	0	0.817544	1.67023e-05	TRUE	FALSE	0
cg01564693	X	68381877	PJA1;PJA1;PJA1	0.84386	0	0.829825	3.21707e-06	FALSE	FALSE	0
cg01579322	X	54209148	FAM120C	0.845614	0	0.864912	0	TRUE	FALSE	0
cg01585723	16	33734837		0.84386	0	0.870175	0	FALSE	TRUE	0
cg01594260	2	8118122	LOC339788	0.857895	0	0.847368	0	TRUE	FALSE	0
cg01596349	X	153627775	RPL10;RPL10;SNORA70	0.868421	0	0.840351	0	TRUE	FALSE	0
cg01600123	X	69672435	DLG3;DLG3;DLG3	0.898246	0	0.884211	0	TRUE	FALSE	0
cg01600189	9	66553962		0.912281	0	0.908772	0	FALSE	FALSE	0
cg01624386	7	76135677		0.849123	0	0.919298	1.15358e-06	TRUE	FALSE	0
cg01629746	15	80503618	LINC01314	0.838596	0	0.877193	0	TRUE	FALSE	0
cg01655658	6	30227583	HLA-L	0.907018	0	0.840351	0	FALSE	FALSE	0
cg01659494	X	30264711	MAGEB1;MAGEB1;MAGEB1	0.845614	0	0.838596	0	FALSE	FALSE	0
cg01703245	X	150566421	VMA21	0.845614	0	0.796491	6.04628e-05	FALSE	FALSE	0
cg01717063	16	57570057	CCDC102A	0.868421	0	0.807018	3.46999e-05	FALSE	TRUE	0
cg01720947	14	106379924		0.877193	0	0.808772	3.12119e-05	FALSE	FALSE	0
cg01722963	16	88263261		0.903509	0	0.884211	0	FALSE	FALSE	0
cg01742333	X	55101093	PAGE2B	0.842105	0	0.829825	3.21707e-06	FALSE	FALSE	0
cg01742836	X	135229755	FHL1;FHL1;FHL1;FHL1;FHL1;FHL1;FHL1;FHL1	0.835088	0	0.785965	9.60713e-05	TRUE	FALSE	0
cg01755617	X	153626633	RPL10;RPL10;RPL10	0.857895	0	0.77193	0.000163189	FALSE	FALSE	0
cg01758418	X	70151160	SLC7A3;SLC7A3	0.847368	0	0.731579	0.000549219	FALSE	FALSE	0
cg01758988	X	148621525	LOC100131434;CXorf40A	0.873684	0	0.796491	6.04628e-05	TRUE	FALSE	0
cg01761703	5	180417980	BTNL3	0.910526	0	0.908772	0	FALSE	FALSE	0
cg01763875	11	123386864		0.861404	0	0.875439	0	FALSE	FALSE	0
cg01767612	17	7011129	ASGR2;ASGR2;ASGR2;ASGR2;ASGR2	0.884211	0	0.919298	1.15358e-06	FALSE	FALSE	0
cg01773478	X	46434442	CHST7	0.852632	0	0.770175	0.000173456	FALSE	FALSE	0
cg01777017	X	138287603	FGF13;FGF13;FGF13	0.859649	0	0.885965	0	TRUE	FALSE	0
cg01780412	X	37004521		0.854386	0	0.738596	0.000455042	FALSE	FALSE	0
cg01782410	4	139621636		0.891228	0	0.796491	6.04628e-05	TRUE	FALSE	0
cg01787110	1	109008453	NBPF6;NBPF6	0.840351	0	0.866667	0	FALSE	TRUE	0
cg01797652	16	21740820	OTOA;OTOA;OTOA	0.873684	0	0.829825	3.21707e-06	FALSE	FALSE	0
cg01817069	X	129086975		0.877193	0	0.889474	0	TRUE	FALSE	0
cg01818076	16	86532758		0.847368	0	0.8	5.08914e-05	TRUE	FALSE	0
cg01821635	1	101089253		0.835088	0	0.835088	0	TRUE	FALSE	0
cg01824170	14	100021745	CCDC85C	0.835088	0	0.733333	0.000524361	TRUE	FALSE	0
cg01829036	X	73524446	ZCCHC13	0.842105	0	0.822807	1.006e-05	FALSE	FALSE	0
cg01831904	17	28903510	LRRC37B2	0.898246	0	0.889474	0	FALSE	TRUE	0
cg01843978	X	49772184	CLCN5;MIR362;CLCN5;MIR500	0.887719	0	0.859649	0	FALSE	FALSE	0
cg01847718	12	14926763	H2AFJ;H2AFJ	0.887719	0	0.821053	1.21192e-05	FALSE	FALSE	0
cg01861096	22	19279212	CLTCL1;CLTCL1;CLTCL1;CLTCL1	0.870175	0	0.836842	0	FALSE	FALSE	0
cg01869765	X	47862977	ZNF182;ZNF182;SPACA5	0.838596	0	0.712281	0.000889312	TRUE	FALSE	0
cg01872988	13	19692744	DKFZp686A1627	0.852632	0	0.845614	0	TRUE	FALSE	0
cg01883217	16	90015832	DEF8;DEF8	0.850877	0	0.861404	0	FALSE	TRUE	0
cg01885202	X	18443457	CDKL5	0.840351	0	0.798246	5.5546e-05	FALSE	FALSE	0
cg01886237	4	122378794		0.891228	0	0.903509	0	FALSE	FALSE	0
cg01902237	X	21958681	SMS;SMS	0.861404	0	0.736842	0.000477298	FALSE	FALSE	0
cg01905377	X	49122718	FOXP3;FOXP3	0.836842	0	0.784211	0.00010313	FALSE	FALSE	0
cg01919618	16	10622064		0.852632	0	0.705263	0.00104802	FALSE	FALSE	0
cg01921484	8	142239716	SLC45A4	0.836842	0	0.74386	0.000393093	TRUE	FALSE	0
cg01947226	X	16889247	RBBP7	0.838596	0	0.719298	0.000750442	TRUE	FALSE	0
cg01970554	X	50212323	DGKK	0.866667	0	0.807018	3.46999e-05	FALSE	FALSE	0
cg01971227	16	3988694		0.838596	0	0.680702	0.00179245	FALSE	FALSE	0
cg01981678	8	7783649	ZNF705B	0.85614	0	0.74386	0.000393093	TRUE	FALSE	0
cg01984154	Y	2718782	RPS4Y1	0.835088	0	0.82807	4.73137e-06	FALSE	TRUE	0
cg01991530	X	21857632	MBTPS2	0.847368	0	0.750877	0.000320886	TRUE	FALSE	0
cg01991743	6	33053608	HLA-DPB1	0.878947	0	0.838596	0	TRUE	FALSE	0
cg02004499	7	4244250	SDK1;SDK1	0.835088	0	0.812281	2.48466e-05	FALSE	TRUE	0
cg02025206	X	9001280	FAM9B	0.877193	0	0.842105	0	FALSE	FALSE	0
cg02031980	X	71401203	PIN4;PIN4;PIN4	0.908772	0	0.817544	1.67023e-05	FALSE	FALSE	0
cg02035173	X	151082306	MAGEA4	0.861404	0	0.864912	0	FALSE	FALSE	0
cg02049865	X	117973548		0.849123	0	0.805263	3.84027e-05	TRUE	FALSE	0
cg02050847	Y	22918038	RPS4Y2;RPS4Y2	0.840351	0	0.87193	0	FALSE	TRUE	0
cg02060618	X	50653733	BMP15	0.880702	0	0.87193	0	FALSE	FALSE	0
cg02061906	X	34150514	FAM47A	0.884211	0	0.868421	0	FALSE	FALSE	0
cg02077481	16	33939020		0.852632	0	0.617544	0.00580234	FALSE	FALSE	0
cg02084408	X	53024965	FAM156A;FAM156A;FAM156A;FAM156A;FAM156A;FAM156A;FAM156A;FAM156A;FAM156A	0.836842	0	0.664912	0.00246427	FALSE	FALSE	0
cg02105393	Y	2804282	ZFY;ZFY;ZFY	0.854386	0	0.815789	1.92403e-05	FALSE	FALSE	0
cg02116333	X	53461433	HSD17B10;HSD17B10	0.849123	0	0.824561	8.14662e-06	FALSE	FALSE	0
cg02118671	8	143660412		0.84386	0	0.749123	0.000337889	TRUE	FALSE	0
cg02124059	X	47341898	ZNF41;ZNF41;ZNF41	0.887719	0	0.717544	0.000783412	FALSE	FALSE	0
cg02127560	6	21762559	FLJ22536	0.849123	0	0.803509	4.23294e-05	FALSE	FALSE	0
cg02128091	21	45012041	HSF2BP	0.854386	0	0.870175	0	FALSE	FALSE	0
cg02138606	Y	13909413		0.877193	0	0.792982	7.1125e-05	FALSE	FALSE	0
cg02154531	X	71237000	NHSL2	0.852632	0	0.863158	0	FALSE	FALSE	0
cg02157463	16	87648182	JPH3	0.894737	0	0.863158	0	FALSE	FALSE	0
cg02161919	X	19002980	PHKA2	0.852632	0	0.703509	0.00109104	FALSE	FALSE	0
cg02173328	14	74877620	SYNDIG1L	0.910526	0	0.892982	0	TRUE	FALSE	0
cg02201215	14	105714846	BRF1;BRF1;BTBD6	0.889474	0	0.898246	0	FALSE	TRUE	0
cg02276823	7	5000111	MMD2;MMD2	0.889474	0	0.738596	0.000455042	FALSE	TRUE	0
cg02276826	10	134778648		0.878947	0	0.780702	0.000118322	FALSE	FALSE	0
cg02283535	X	103811660	IL1RAPL2;IL1RAPL2	0.864912	0	0.792982	7.1125e-05	TRUE	FALSE	0
cg02285254	X	135229382	FHL1;FHL1;FHL1;FHL1;FHL1	0.905263	0	0.789474	8.29641e-05	FALSE	FALSE	0
cg02293258	X	57147872	SPIN2B;SPIN2B;SPIN2B;SPIN2B;SPIN2B;SPIN2B	0.857895	0	0.687719	0.00154617	FALSE	FALSE	0
cg02295504	X	100878362	ARMCX3;ARMCX3;ARMCX3;ARMCX3	0.842105	0	0.7	0.00118136	TRUE	FALSE	0
cg02300694	9	66553935	LOC728673;LOC403323;LOC403323	0.908772	0	0.882456	0	FALSE	FALSE	0
cg02309026	10	855060		0.861404	0	0.798246	5.5546e-05	FALSE	FALSE	0
cg02311013	X	48619642	GLOD5	0.842105	0	0.775439	0.000143992	FALSE	FALSE	0
cg02327189	7	57830004		0.852632	0	0.849123	0	FALSE	FALSE	0
cg02333283	X	153707099	LAGE3	0.836842	0	0.794737	6.56523e-05	FALSE	FALSE	0
cg02333792	15	79269735	RASGRF1;RASGRF1;RASGRF1	0.87193	0	0.875439	0	FALSE	FALSE	0
cg02336608	X	18693859		0.838596	0	0.875439	0	FALSE	FALSE	0
cg02356786	1	243265016	LOC731275	0.870175	0	0.650877	0.00322172	FALSE	TRUE	0
cg02370566	17	78716850	RPTOR;RPTOR	0.898246	0	0.782456	0.000110543	TRUE	FALSE	0
cg02386862	X	122993369	XIAP;XIAP;XIAP	0.863158	0	0.754386	0.00028885	FALSE	FALSE	0
cg02395762	X	117982936	LINC01285	0.907018	0	0.912281	0	FALSE	FALSE	0
cg02401352	15	89354338	ACAN;ACAN	0.863158	0	0.707018	0.00100637	TRUE	FALSE	0
cg02433927	X	39969103	BCOR;BCOR	0.861404	0	0.908772	0	FALSE	FALSE	0
cg02451774	1	147801218		0.898246	0	0.910526	0	FALSE	FALSE	0
cg02454298	X	135132372		0.838596	0	0.789474	8.29641e-05	FALSE	FALSE	0
cg02454670	X	107069049	MID2;MID2	0.852632	0	0.736842	0.000477298	FALSE	FALSE	0
cg02464073	21	46349496	ITGB2	0.861404	0	0.873684	0	TRUE	FALSE	0
cg02470045	19	56146928		0.861404	0	0.719298	0.000750442	FALSE	FALSE	0
cg02479782	2	71033156		0.875439	0	0.721053	0.000718586	TRUE	FALSE	0
cg02486009	15	22428395		0.850877	0	0.921053	1.50172e-06	FALSE	FALSE	0
cg02513556	12	10095902		0.838596	0	0.784211	0.00010313	FALSE	TRUE	0
cg02516513	8	27950396	ELP3	0.884211	0	0.894737	0	FALSE	TRUE	0
cg02520942	X	128782756	APLN;APLN	0.845614	0	0.878947	0	FALSE	FALSE	0
cg02523105	X	134232832	NCRNA00087	0.863158	0	0.754386	0.00028885	TRUE	FALSE	0
cg02527811	2	241834907	C2orf54	0.845614	0	0.303509	0.205987	FALSE	FALSE	0
cg02530767	X	77151319	MAGT1	0.852632	0	0.849123	0	FALSE	FALSE	0
cg02537757	X	70418471		0.850877	0	0.808772	3.12119e-05	FALSE	FALSE	0
cg02540440	X	39866758		0.87193	0	0.794737	6.56523e-05	FALSE	FALSE	0
cg02546416	6	170487311		0.896491	0	0.905263	0	FALSE	TRUE	0
cg02547323	X	103087380	RAB9B	0.889474	0	0.761404	0.000232117	TRUE	FALSE	0
cg02582450	Y	14075806		0.857895	0	0.749123	0.000337889	FALSE	FALSE	0
cg02598773	12	132891957	GALNT9	0.859649	0	0.764912	0.000207123	FALSE	FALSE	0
cg02602528	X	49028148	PLP2	0.859649	0	0.729825	0.000574995	FALSE	FALSE	0
cg02616328	Y	2803947	ZFY;ZFY;ZFY	0.861404	0	0.801754	4.64892e-05	FALSE	TRUE	0
cg02616921	X	69455617	AWAT1	0.892982	0	0.864912	0	FALSE	FALSE	0
cg02622846	11	88096346		0.908772	0	0.817544	1.67023e-05	TRUE	FALSE	0
cg02623256	X	24483231	PDK3;PDK3	0.847368	0	0.740351	0.000433605	FALSE	FALSE	0
cg02624129	11	130786230	SNX19;SNX19	0.896491	0	0.812281	2.48466e-05	FALSE	TRUE	0
cg02627872	1	229260510		0.880702	0	0.877193	0	TRUE	FALSE	0
cg02628858	13	29910801	MTUS2	0.852632	0	0.835088	0	TRUE	FALSE	0
cg02645808	X	54557502	GNL3L;GNL3L	0.845614	0	0.868421	0	FALSE	FALSE	0
cg02670466	3	47020191	NBEAL2	0.882456	0	0.712281	0.000889312	FALSE	FALSE	0
cg02672452	2	91818189		0.850877	0	0.868421	0	FALSE	FALSE	0
cg02716302	4	190960010		0.912281	0	0.912281	0	FALSE	FALSE	0
cg02737291	2	44382430		0.861404	0	0.689474	0.0014891	FALSE	FALSE	0
cg02743552	X	148550982		0.908772	0	0.891228	0	FALSE	FALSE	0
cg02756511	X	106693692		0.880702	0	0.724561	0.000658097	TRUE	FALSE	0
cg02772171	5	171054642		0.877193	0	0.784211	0.00010313	TRUE	FALSE	0
cg02772880	16	71260651	HYDIN;HYDIN	0.835088	0	0.745614	0.000373971	TRUE	FALSE	0
cg02780130	12	312753	LOC101929384;SLC6A12;SLC6A12;SLC6A12;SLC6A12	0.838596	0	0.670175	0.00222081	FALSE	FALSE	0
cg02788935	10	128824401	DOCK1;DOCK1	0.836842	0	0.775439	0.000143992	FALSE	FALSE	0
cg02791948	X	153236083	HCFC1	0.836842	0	0.752632	0.000304546	FALSE	FALSE	0
cg02799972	X	47383109		0.852632	0	0.789474	8.29641e-05	FALSE	FALSE	0
cg02800016	X	100740430	ARMCX4;ARMCX4;ARMCX4;ARMCX4;ARMCX4	0.84386	0	0.782456	0.000110543	TRUE	FALSE	0
cg02834750	X	133119866	GPC3;GPC3;GPC3;GPC3	0.877193	0	0.819298	1.4331e-05	FALSE	FALSE	0
cg02836821	X	132095360	HS6ST2;HS6ST2;HS6ST2;HS6ST2	0.842105	0	0.689474	0.0014891	FALSE	FALSE	0
cg02858510	14	51818419		0.863158	0	0.722807	0.000687814	FALSE	FALSE	0
cg02859554	X	19140359	GPR64;GPR64;GPR64;GPR64	0.85614	0	0.722807	0.000687814	FALSE	FALSE	0
cg02860336	X	117832928		-0.838596	0	-0.721053	0.000718586	FALSE	FALSE	0
cg02869694	X	153775262	IKBKG;G6PD;G6PD;IKBKG;IKBKG;IKBKG	0.838596	0	0.784211	0.00010313	TRUE	FALSE	0
cg02879223	X	69672415	DLG3;DLG3;DLG3	0.864912	0	0.8	5.08914e-05	FALSE	FALSE	0
cg02882301	X	49126157	PPP1R3F	0.849123	0	0.807018	3.46999e-05	TRUE	FALSE	0
cg02884332	Y	22737946	EIF1AY	0.849123	0	0.857895	0	FALSE	FALSE	0
cg02886961	14	24679935	CHMP4A	0.889474	0	0.794737	6.56523e-05	FALSE	FALSE	0
cg02891306	X	12809591	PRPS2;PRPS2;PRPS2;PRPS2	0.849123	0	0.852632	0	FALSE	FALSE	0
cg02891314	5	179741120	GFPT2	0.85614	0	0.896491	0	FALSE	TRUE	0
cg02907374	11	15095028	CALCB	0.907018	0	0.431579	0.0664706	FALSE	FALSE	0
cg02907441	X	37026364	FAM47C	0.885965	0	0.859649	0	FALSE	FALSE	0
cg02910887	X	56815498	LINC01420	0.887719	0	0.624561	0.00515281	FALSE	FALSE	0
cg02917448	X	65152206		0.85614	0	0.854386	0	FALSE	FALSE	0
cg02921434	X	146993433	ASFMR1;FMR1;ASFMR1;ASFMR1;ASFMR1;ASFMR1	0.857895	0	0.75614	0.000273778	TRUE	FALSE	0
cg02932958	10	128814334	DOCK1;DOCK1	0.910526	0	0.821053	1.21192e-05	TRUE	FALSE	0
cg02933448	X	34675521	TMEM47	0.836842	0	0.738596	0.000455042	TRUE	FALSE	0
cg02938958	X	25022847	ARX	0.873684	0	0.766667	0.000195408	FALSE	FALSE	0
cg02939364	X	18443708	CDKL5	0.838596	0	0.710526	0.000927047	FALSE	FALSE	0
cg02953125	2	1079100	SNTG2	0.852632	0	0.877193	0	FALSE	TRUE	0
cg02953382	22	24373134	LOC391322;LOC391322	0.847368	0	0.854386	0	FALSE	TRUE	0
cg02954704	1	161349006		0.845614	0	0.8	5.08914e-05	FALSE	TRUE	0
cg02958670	4	57256689		0.845614	0	0.773684	0.000153372	TRUE	FALSE	0
cg02968327	15	81584389	IL16;IL16	0.87193	0	0.85614	0	TRUE	FALSE	0
cg02969243	X	11445762	ARHGAP6;ARHGAP6	0.842105	0	0.680702	0.00179245	FALSE	FALSE	0
cg02971902	X	135991927		0.845614	0	0.798246	5.5546e-05	FALSE	FALSE	0
cg02973971	X	149106460	LOC100272228;CXorf40B;CXorf40B	0.840351	0	0.815789	1.92403e-05	TRUE	FALSE	0
cg02996355	14	81879375		0.912281	0	0.905263	0	FALSE	TRUE	0
cg03003060	X	13956166	GPM6B	0.861404	0	0.82807	4.73137e-06	FALSE	FALSE	0
cg03013609	1	236702902	LGALS8;LGALS8;LGALS8;LGALS8	0.836842	0	0.85614	0	TRUE	FALSE	0
cg03019812	6	29944670	HCG9	0.912281	0	0.817544	1.67023e-05	FALSE	FALSE	0
cg03020597	X	144898810	SLITRK2;SLITRK2;SLITRK2;SLITRK2	0.912281	0	0.729825	0.000574995	FALSE	FALSE	0
cg03031357	X	21959700	SMS	0.84386	0	0.763158	0.000219354	FALSE	FALSE	0
cg03033576	X	123479185	SH2D1A;SH2D1A	0.840351	0	0.731579	0.000549219	FALSE	FALSE	0
cg03034673	7	106670287		0.907018	0	0.845614	0	TRUE	FALSE	0
cg03038395	X	25031600	ARX	0.861404	0	0.826316	6.37252e-06	TRUE	FALSE	0
cg03045133	6	29870056	HCG2P7	0.870175	0	0.859649	0	TRUE	FALSE	0
cg03056849	X	149861683	MTMR1	0.84386	0	0.792982	7.1125e-05	TRUE	FALSE	0
cg03057303	17	74558057	SNHG16;SNHG16;SNHG16;SNHG16	0.861404	0	0.750877	0.000320886	TRUE	FALSE	0
cg03063471	13	53522174		0.842105	0	0.819298	1.4331e-05	FALSE	FALSE	0
cg03073264	5	102898493	NUDT12;NUDT12;NUDT12;NUDT12	0.875439	0	0.740351	0.000433605	FALSE	FALSE	0
cg03078816	8	143361320	TSNARE1	0.9	0	0.924561	2.17851e-06	TRUE	FALSE	0
cg03085949	7	154958558		0.868421	0	0.701754	0.00113548	FALSE	FALSE	0
cg03089575	X	34676067	TMEM47	0.847368	0	0.682456	0.00172809	FALSE	FALSE	0
cg03099683	4	132661931		0.880702	0	0.761404	0.000232117	FALSE	TRUE	0
cg03102729	X	120181504	GLUD2;GLUD2	0.850877	0	0.768421	0.000184191	FALSE	FALSE	0
cg03104970	7	50435337	IKZF1;IKZF1;IKZF1;IKZF1;IKZF1;IKZF1;IKZF1;IKZF1;IKZF1;IKZF1;IKZF1;IKZF1;IKZF1;IKZF1;IKZF1;IKZF1;IKZF1	0.847368	0	0.440351	0.0606897	FALSE	FALSE	0
cg03112518	19	491572		0.838596	0	0.615789	0.00597476	TRUE	FALSE	0
cg03114668	10	15039611		0.842105	0	0.792982	7.1125e-05	FALSE	FALSE	0
cg03121419	X	125687720	DCAF12L1	0.863158	0	0.889474	0	TRUE	FALSE	0
cg03122926	7	2425741		0.878947	0	0.721053	0.000718586	TRUE	FALSE	0
cg03128011	8	1321333		0.877193	0	0.794737	6.56523e-05	FALSE	TRUE	0
cg03134882	10	135341463	CYP2E1	0.912281	0	0.675439	0.00199731	FALSE	FALSE	0
cg03161453	X	39962049	BCOR;BCOR	0.857895	0	0.775439	0.000143992	TRUE	FALSE	0
cg03161606	19	29218774		0.908772	0	0.822807	1.006e-05	FALSE	TRUE	0
cg03164238	19	54494652	CACNG6;CACNG6;CACNG6	0.840351	0	0.722807	0.000687814	FALSE	TRUE	0
cg03169447	X	153781626	IKBKG;IKBKG;IKBKG;IKBKG	0.885965	0	0.866667	0	FALSE	FALSE	0
cg03179419	13	114773785	RASA3	0.901754	0	0.875439	0	FALSE	FALSE	0
cg03185552	17	81060259		0.889474	0	0.919298	1.15358e-06	TRUE	FALSE	0
cg03188685	3	144341907		0.892982	0	0.85614	0	TRUE	FALSE	0
cg03189022	X	153237590	TMEM187;HCFC1	0.852632	0	0.747368	0.000355578	FALSE	FALSE	0
cg03191860	16	33960675		0.861404	0	0.77193	0.000163189	FALSE	FALSE	0
cg03197063	13	98859334	MIR3170;FARP1;FARP1;FARP1	0.863158	0	0.882456	0	FALSE	FALSE	0
cg03199955	X	30671630	GK;GK;GK;GK;GK;GK	0.835088	0	0.852632	0	FALSE	FALSE	0
cg03202526	X	139587311	SOX3	0.907018	0	0.745614	0.000373971	TRUE	FALSE	0
cg03203155	6	28709803		0.852632	0	0.778947	0.000126481	FALSE	FALSE	0
cg03206476	X	45240562		0.852632	0	0.85614	0	FALSE	FALSE	0
cg03219705	X	38420578	TSPAN7	0.868421	0	0.787719	8.93533e-05	FALSE	FALSE	0
cg03221390	1	247803637		0.889474	0	0.847368	0	TRUE	FALSE	0
cg03244189	Y	21238472	TTTY14	0.847368	0	0.852632	0	FALSE	FALSE	0
cg03250911	X	153236396	HCFC1;HCFC1	0.842105	0	0.745614	0.000373971	FALSE	FALSE	0
cg03263197	1	110654497	UBL4B	0.864912	0	0.735088	0.000500396	TRUE	FALSE	0
cg03272642	X	69509773	PDZD11;PDZD11;KIF4A	0.877193	0	0.777193	0.000135032	TRUE	FALSE	0
cg03310027	15	43941072	CATSPER2;CATSPER2;CATSPER2	0.877193	0	0.870175	0	FALSE	FALSE	0
cg03312856	16	84219629	TAF1C;TAF1C	0.903509	0	0.907018	0	FALSE	TRUE	0
cg03324099	2	52761238		0.898246	0	0.850877	0	TRUE	FALSE	0
cg03327327	1	214779620	CENPF	0.863158	0	0.615789	0.00597476	FALSE	TRUE	0
cg03329597	3	108125523	MYH15	0.847368	0	0.768421	0.000184191	TRUE	FALSE	0
cg03334316	X	54209370	FAM120C	0.878947	0	0.812281	2.48466e-05	TRUE	FALSE	0
cg03335173	X	151806923	GABRQ	0.912281	0	0.822807	1.006e-05	TRUE	FALSE	0
cg03344283	15	20562413		0.866667	0	0.849123	0	FALSE	FALSE	0
cg03364150	10	46947700		0.908772	0	0.882456	0	FALSE	FALSE	0
cg03386715	1	3153293	PRDM16;PRDM16	0.859649	0	0.892982	0	FALSE	FALSE	0
cg03410547	X	103294340	H2BFM	0.849123	0	0.845614	0	FALSE	FALSE	0
cg03410772	6	29970005	NCRNA00171	0.859649	0	0.812281	2.48466e-05	FALSE	FALSE	0
cg03422380	X	107019244	TSC22D3	0.868421	0	0.791228	7.68918e-05	FALSE	FALSE	0
cg03429460	19	36334002	NPHS1	0.842105	0	0.875439	0	FALSE	FALSE	0
cg03432589	3	10436869	ATP2B2;MIR885;ATP2B2	0.892982	0	0.754386	0.00028885	TRUE	FALSE	0
cg03433313	16	819064	MIR662	0.852632	0	0.821053	1.21192e-05	FALSE	TRUE	0
cg03441539	7	74490355	WBSCR16;WBSCR16;WBSCR16	0.847368	0	0.794737	6.56523e-05	FALSE	FALSE	0
cg03449857	6	29648623		0.850877	0	0.787719	8.93533e-05	TRUE	FALSE	0
cg03454353	9	115819364	ZFP37	0.845614	0	0.803509	4.23294e-05	FALSE	FALSE	0
cg03467235	20	21003839		0.870175	0	0.910526	0	TRUE	FALSE	0
cg03493520	11	82535460	PRCP;PRCP	0.910526	0	0.803509	4.23294e-05	FALSE	FALSE	0
cg03525852	8	7055288		0.857895	0	0.889474	0	TRUE	FALSE	0
cg03533355	13	79001254	RNF219-AS1	0.910526	0	0.878947	0	FALSE	FALSE	0
cg03533500	Y	21668420		0.859649	0	0.789474	8.29641e-05	TRUE	TRUE	0
cg03546619	3	98376478		0.9	0	0.764912	0.000207123	FALSE	TRUE	0
cg03572700	X	7000572	HDHD1;HDHD1;HDHD1;HDHD1	0.861404	0	0.675439	0.00199731	TRUE	FALSE	0
cg03576235	X	26576430	VENTXP1	0.898246	0	0.898246	0	FALSE	FALSE	0
cg03590418	X	153570171		0.889474	0	0.785965	9.60713e-05	TRUE	FALSE	0
cg03595199	8	39869813	IDO2	0.889474	0	0.824561	8.14662e-06	FALSE	FALSE	0
cg03598919	X	51150887	CXorf67	0.880702	0	0.863158	0	FALSE	FALSE	0
cg03605032	X	149533195		0.884211	0	0.738596	0.000455042	TRUE	FALSE	0
cg03651613	12	122150514	TMEM120B	0.850877	0	0.821053	1.21192e-05	FALSE	TRUE	0
cg03679269	X	71351803	NHSL2;RGAG4	0.864912	0	0.745614	0.000373971	FALSE	FALSE	0
cg03688085	1	1910585	KIAA1751	0.842105	0	0.849123	0	FALSE	TRUE	0
cg03689070	10	133466918		0.884211	0	0.892982	0	TRUE	FALSE	0
cg03695421	Y	14074773		0.875439	0	0.854386	0	FALSE	FALSE	0
cg03728850	X	55515614	USP51;USP51	0.907018	0	0.705263	0.00104802	FALSE	FALSE	0
cg03734380	X	11446028	ARHGAP6;ARHGAP6;ARHGAP6;ARHGAP6	0.894737	0	0.731579	0.000549219	FALSE	FALSE	0
cg03749917	1	151826937	THEM5	0.842105	0	0.773684	0.000153372	FALSE	FALSE	0
cg03752386	X	102752443		0.850877	0	0.768421	0.000184191	FALSE	FALSE	0
cg03756044	12	130631034		0.884211	0	0.650877	0.00322172	TRUE	FALSE	0
cg03768687	X	70288358	SNX12	0.866667	0	0.838596	0	FALSE	FALSE	0
cg03770889	5	2352730		0.875439	0	0.778947	0.000126481	TRUE	FALSE	0
cg03779543	X	154470539		0.857895	0	0.898246	0	FALSE	FALSE	0
cg03796003	16	2746544	KCTD5	0.894737	0	0.742105	0.000412963	TRUE	FALSE	0
cg03797305	16	30209202	SULT1A3;SULT1A4;SULT1A4;SULT1A3	0.864912	0	0.782456	0.000110543	FALSE	FALSE	0
cg03805048	X	75648083	MAGEE1	0.838596	0	0.761404	0.000232117	FALSE	FALSE	0
cg03810476	X	17392798	NHS	0.84386	0	0.752632	0.000304546	FALSE	FALSE	0
cg03810616	9	136545864	SARDH;SARDH	0.868421	0	0.740351	0.000433605	TRUE	FALSE	0
cg03817616	X	63615495	MTMR8	0.842105	0	0.782456	0.000110543	FALSE	FALSE	0
cg03821116	5	1498985	LPCAT1	0.898246	0	0.868421	0	FALSE	FALSE	0
cg03821767	X	119123179		0.84386	0	0.821053	1.21192e-05	FALSE	FALSE	0
cg03823149	X	53468600		0.838596	0	0.673684	0.00206967	FALSE	FALSE	0
cg03834574	X	56259094	KLF8;KLF8;KLF8;KLF8	0.866667	0	0.796491	6.04628e-05	TRUE	FALSE	0
cg03849132	8	104137224		0.875439	0	0.775439	0.000143992	FALSE	FALSE	0
cg03889767	4	987672	IDUA;SLC26A1;SLC26A1;SLC26A1	0.885965	0	0.884211	0	FALSE	FALSE	0
cg03894002	X	69664599	DLG3	0.863158	0	0.701754	0.00113548	TRUE	FALSE	0
cg03894796	8	144361315		0.863158	0	0.835088	0	FALSE	TRUE	0
cg03909086	21	15066995		0.861404	0	0.849123	0	FALSE	FALSE	0
cg03912880	X	47583441	CXXC1P1	0.877193	0	0.885965	0	FALSE	FALSE	0
cg03913278	8	11995002	FAM66D;USP17L2	0.840351	0	0.822807	1.006e-05	FALSE	FALSE	0
cg03929089	4	120376271		0.845614	0	0.787719	8.93533e-05	FALSE	TRUE	0
cg03940883	16	14380714		0.864912	0	0.877193	0	TRUE	FALSE	0
cg03944143	17	2595123	KIAA0664	0.849123	0	0.785965	9.60713e-05	FALSE	TRUE	0
cg03958744	13	114795097	RASA3	0.880702	0	0.882456	0	FALSE	FALSE	0
cg03964091	22	49062324	FAM19A5;FAM19A5	0.863158	0	0.859649	0	TRUE	FALSE	0
cg03965172	4	3683268		0.87193	0	0.773684	0.000153372	TRUE	FALSE	0
cg03968699	X	153236214	HCFC1	0.859649	0	0.803509	4.23294e-05	FALSE	FALSE	0
cg03971283	X	153141451	L1CAM;L1CAM;L1CAM	0.878947	0	0.685965	0.00160499	FALSE	FALSE	0
cg03979311	5	54319996	GZMK	0.887719	0	0.907018	0	FALSE	FALSE	0
cg03982462	6	159888248		0.901754	0	0.850877	0	TRUE	FALSE	0
cg03987818	2	186988953		0.857895	0	0.780702	0.000118322	TRUE	FALSE	0
cg03991766	X	9755100	SHROOM2	0.87193	0	0.740351	0.000433605	FALSE	FALSE	0
cg03993368	X	134479056	ZNF75D;ZNF449	0.903509	0	0.761404	0.000232117	TRUE	FALSE	0
cg03993934	X	101411275	BEX5;BEX5	0.85614	0	0.812281	2.48466e-05	FALSE	FALSE	0
cg03996447	X	19533577	MAP3K15	0.894737	0	0.770175	0.000173456	TRUE	FALSE	0
cg03999583	3	197385493		0.903509	0	0.650877	0.00322172	TRUE	FALSE	0
cg04023335	Y	14100573		0.875439	0	0.826316	6.37252e-06	FALSE	FALSE	0
cg04028107	9	19127687	PLIN2;PLIN2	0.908772	0	0.775439	0.000143992	FALSE	FALSE	0
cg04072009	X	71351668	NHSL2;RGAG4;RGAG4	0.85614	0	0.8	5.08914e-05	TRUE	TRUE	0
cg04077706	19	43442484	PSG7	0.854386	0	0.817544	1.67023e-05	FALSE	FALSE	0
cg04083966	1	203144832	MYBPH	0.857895	0	0.873684	0	TRUE	FALSE	0
cg04129556	7	176975		0.905263	0	0.829825	3.21707e-06	FALSE	FALSE	0
cg04131969	2	33951647	MYADML	0.878947	0	0.910526	0	TRUE	FALSE	0
cg04132418	6	131148736	LOC285733	0.891228	0	0.840351	0	TRUE	FALSE	0
cg04136259	7	1581522	MAFK	0.898246	0	0.778947	0.000126481	FALSE	FALSE	0
cg04136921	11	5626314	TRIM6;TRIM6;TRIM6;TRIM6;TRIM6-TRIM34	0.875439	0	0.757895	0.000259311	TRUE	FALSE	0
cg04149024	X	153656891	ATP6AP1	0.868421	0	0.759649	0.00024543	TRUE	FALSE	0
cg04154653	1	1133248	TTLL10	0.857895	0	0.687719	0.00154617	TRUE	TRUE	0
cg04166210	X	103087157	RAB9B;RAB9B	0.85614	0	0.787719	8.93533e-05	FALSE	FALSE	0
cg04173211	15	81489338	IL16;IL16	0.878947	0	0.796491	6.04628e-05	TRUE	FALSE	0
cg04175473	10	134563870	INPP5A	0.866667	0	0.878947	0	TRUE	FALSE	0
cg04210573	X	71351784	RGAG4;NHSL2	0.870175	0	0.740351	0.000433605	FALSE	FALSE	0
cg04234412	22	24373322	LOC391322	0.880702	0	0.791228	7.68918e-05	TRUE	TRUE	0
cg04234424	7	148102010	CNTNAP2	0.889474	0	0.717544	0.000783412	TRUE	FALSE	0
cg04241572	X	53461213	HSD17B10;HSD17B10	0.885965	0	0.896491	0	FALSE	FALSE	0
cg04271131	X	9433870	TBL1X;TBL1X;TBL1X;TBL1X	0.85614	0	0.717544	0.000783412	FALSE	FALSE	0
cg04271735	X	54824694	ITIH6	0.842105	0	0.759649	0.00024543	FALSE	FALSE	0
cg04276750	6	29856938	HLA-H	0.898246	0	0.814035	2.19525e-05	FALSE	FALSE	0
cg04287191	X	153210222	RENBP;RENBP	0.887719	0	0.768421	0.000184191	FALSE	FALSE	0
cg04292615	19	53290079	ZNF600	0.864912	0	0.7	0.00118136	FALSE	TRUE	0
cg04298253	16	90143815	PRDM7	0.9	0	0.777193	0.000135032	FALSE	TRUE	0
cg04303560	X	55249036	PAGE5;PAGE5	0.835088	0	0.791228	7.68918e-05	FALSE	FALSE	0
cg04324607	X	9960206		0.836842	0	0.821053	1.21192e-05	FALSE	FALSE	0
cg04331561	4	167021679	TLL1	0.878947	0	0.907018	0	TRUE	FALSE	0
cg04334385	X	119620153		0.84386	0	0.785965	9.60713e-05	FALSE	FALSE	0
cg04350223	X	18138293		0.849123	0	0.868421	0	FALSE	FALSE	0
cg04376185	X	17755081	SCML1;SCML1;SCML1;SCML1	0.838596	0	0.735088	0.000500396	TRUE	FALSE	0
cg04387098	X	48380042	EBP	0.854386	0	0.750877	0.000320886	FALSE	FALSE	0
cg04392293	11	28399977		0.849123	0	0.729825	0.000574995	FALSE	FALSE	0
cg04392694	X	49019049	MAGIX;MAGIX;MAGIX;MAGIX	0.852632	0	0.726316	0.000629407	FALSE	FALSE	0
cg04398451	17	18023971	MYO15A	0.885965	0	0.659649	0.00272906	FALSE	TRUE	0
cg04414946	X	9435372	TBL1X;TBL1X;TBL1X;TBL1X	0.849123	0	0.891228	0	FALSE	FALSE	0
cg04415694	3	41143414		0.868421	0	0.859649	0	FALSE	FALSE	0
cg04418355	6	32729174	HLA-DQB2	0.835088	0	0.803509	4.23294e-05	FALSE	FALSE	0
cg04428700	7	27239556	HOXA13	0.845614	0	0.796491	6.04628e-05	FALSE	FALSE	0
cg04438194	4	119512985		0.866667	0	0.65614	0.00291815	FALSE	TRUE	0
cg04441645	4	190332642		0.836842	0	0.8	5.08914e-05	TRUE	FALSE	0
cg04442191	X	30705617	GK;GK;GK;GK	0.864912	0	0.833333	5.45502e-07	FALSE	FALSE	0
cg04456492	7	20010777		0.852632	0	0.857895	0	TRUE	FALSE	0
cg04462915	17	76396609	PGS1;PGS1;PGS1;PGS1	0.908772	0	0.9	0	TRUE	FALSE	0
cg04481923	5	135416205	MIR886	0.875439	0	0.877193	0	TRUE	FALSE	0
cg04483721	14	106373110		0.840351	0	0.708772	0.000966054	TRUE	FALSE	0
cg04493908	Y	7426653		0.845614	0	0.803509	4.23294e-05	FALSE	FALSE	0
cg04497165	X	103494417		0.842105	0	0.884211	0	FALSE	FALSE	0
cg04499455	6	31356802		0.878947	0	0.845614	0	FALSE	FALSE	0
cg04508810	X	154299651	BRCC3;BRCC3;BRCC3;CMC4;MTCP1	0.835088	0	0.801754	4.64892e-05	FALSE	FALSE	0
cg04515987	Y	22960295		0.838596	0	0.84386	0	TRUE	FALSE	0
cg04524851	X	57618891	ZXDB	0.9	0	0.714035	0.000852816	TRUE	FALSE	0
cg04534902	12	96388051	HAL;HAL;HAL	0.861404	0	0.780702	0.000118322	TRUE	FALSE	0
cg04552499	2	11288577		0.836842	0	0.8	5.08914e-05	TRUE	FALSE	0
cg04564438	X	28605374	IL1RAPL1	0.849123	0	0.603509	0.00730263	FALSE	FALSE	0
cg04566761	X	70881988	BCYRN1	0.852632	0	0.784211	0.00010313	FALSE	FALSE	0
cg04574325	12	132145934		0.845614	0	0.889474	0	FALSE	FALSE	0
cg04619644	X	153083134	PDZD4	0.836842	0	0.650877	0.00322172	FALSE	FALSE	0
cg04621752	X	100307374	TRMT2B;TRMT2B;TRMT2B;TRMT2B	0.861404	0	0.808772	3.12119e-05	FALSE	FALSE	0
cg04647948	2	206950423	INO80D	0.847368	0	0.785965	9.60713e-05	FALSE	FALSE	0
cg04657146	19	12876947	HOOK2;HOOK2	0.878947	0	0.919298	1.15358e-06	TRUE	TRUE	0
cg04657470	2	198365150	HSPE1;HSPE1;HSPD1;HSPD1	0.903509	0	0.854386	0	FALSE	TRUE	0
cg04662567	6	169592167		0.859649	0	0.745614	0.000373971	FALSE	TRUE	0
cg04672375	X	99891860	TSPAN6;TSPAN6;TSPAN6;TSPAN6;TSPAN6;TSPAN6;TSPAN6;TSPAN6	0.845614	0	0.840351	0	FALSE	FALSE	0
cg04683516	10	5047487	AKR1C2;AKR1C2;AKR1C2	0.866667	0	0.878947	0	TRUE	FALSE	0
cg04692312	20	29518816		0.889474	0	0.784211	0.00010313	FALSE	FALSE	0
cg04700060	X	129402929	ZNF280C	0.875439	0	0.735088	0.000500396	FALSE	FALSE	0
cg04716051	X	18443256	CDKL5	0.861404	0	0.845614	0	FALSE	FALSE	0
cg04731120	17	29158087	ATAD5	0.835088	0	0.82807	4.73137e-06	FALSE	FALSE	0
cg04732279	X	53622552	HUWE1	0.85614	0	0.838596	0	FALSE	FALSE	0
cg04751886	X	53220515	KDM5C;KDM5C	0.852632	0	0.784211	0.00010313	FALSE	FALSE	0
cg04774597	15	69744390	RPLP1;RPLP1	0.840351	0	0.764912	0.000207123	FALSE	FALSE	0
cg04789860	1	1677548	SLC35E2	0.903509	0	0.850877	0	FALSE	FALSE	0
cg04790916	Y	15591260	UTY;UTY;UTY	0.907018	0	0.770175	0.000173456	FALSE	FALSE	0
cg04798314	1	246668601	SMYD3	0.845614	0	0.72807	0.000601715	TRUE	FALSE	0
cg04799028	X	12977479		0.852632	0	0.819298	1.4331e-05	FALSE	FALSE	0
cg04817258	Y	6117321		0.847368	0	0.763158	0.000219354	FALSE	FALSE	0
cg04820593	X	54383906	WNK3;WNK3	0.894737	0	0.849123	0	FALSE	FALSE	0
cg04824913	4	887549	GAK	0.912281	0	0.82807	4.73137e-06	FALSE	TRUE	0
cg04827593	10	31416769		0.845614	0	0.794737	6.56523e-05	FALSE	FALSE	0
cg04843821	10	33016632	C10orf68	0.864912	0	0.817544	1.67023e-05	TRUE	FALSE	0
cg04854911	8	1913132		0.84386	0	0.698246	0.00122872	FALSE	FALSE	0
cg04855977	X	128977653	ZDHHC9;ZDHHC9	0.887719	0	0.770175	0.000173456	TRUE	FALSE	0
cg04861073	12	132939425		0.908772	0	0.822807	1.006e-05	TRUE	FALSE	0
cg04875706	15	97311928		0.845614	0	0.785965	9.60713e-05	TRUE	FALSE	0
cg04879348	2	109124576	GCC2;GCC2	0.842105	0	0.821053	1.21192e-05	FALSE	TRUE	0
cg04879387	16	16043101	ABCC1;ABCC1;ABCC1;ABCC1;ABCC1	0.908772	0	0.72807	0.000601715	FALSE	TRUE	0
cg04882216	1	3101820	PRDM16;PRDM16	0.849123	0	0.701754	0.00113548	TRUE	FALSE	0
cg04896838	X	13077781		0.880702	0	0.731579	0.000549219	FALSE	FALSE	0
cg04898932	22	35645717		0.852632	0	0.75614	0.000273778	FALSE	FALSE	0
cg04924736	X	101410888	BEX5;BEX5;BEX5	0.857895	0	0.824561	8.14662e-06	TRUE	FALSE	0
cg04926827	X	109246494	TMEM164;TMEM164	0.859649	0	0.777193	0.000135032	FALSE	FALSE	0
cg04934298	X	96098801	DIAPH2;DIAPH2	0.863158	0	0.857895	0	TRUE	FALSE	0
cg04971183	19	16132558	LINC00661	0.87193	0	0.733333	0.000524361	FALSE	FALSE	0
cg04980389	2	26728179	OTOF;OTOF	0.878947	0	0.747368	0.000355578	TRUE	FALSE	0
cg04998327	11	103453960		0.840351	0	0.857895	0	TRUE	FALSE	0
cg04999756	11	117316545	DSCAML1	0.861404	0	0.838596	0	TRUE	FALSE	0
cg05008355	X	153095404	PDZD4;PDZD4;PDZD4;PDZD4;PDZD4;PDZD4	0.868421	0	0.796491	6.04628e-05	FALSE	FALSE	0
cg05019001	X	66766334	AR	0.873684	0	0.782456	0.000110543	FALSE	FALSE	0
cg05023132	X	95939482	DIAPH2;DIAPH2	0.861404	0	0.878947	0	FALSE	FALSE	0
cg05023192	2	240965916	NDUFA10	0.849123	0	0.847368	0	TRUE	FALSE	0
cg05029625	X	64627755		0.889474	0	0.814035	2.19525e-05	FALSE	FALSE	0
cg05031484	X	41316942	NYX	0.873684	0	0.896491	0	FALSE	FALSE	0
cg05037738	3	194220473		0.847368	0	0.857895	0	FALSE	FALSE	0
cg05045659	X	67352784	OPHN1	0.849123	0	0.842105	0	FALSE	FALSE	0
cg05047411	X	149009895	MAGEA8;MAGEA8;MAGEA8	0.878947	0	0.815789	1.92403e-05	FALSE	FALSE	0
cg05049545	X	18372696	SCML2	0.838596	0	0.750877	0.000320886	TRUE	FALSE	0
cg05051980	X	102413362		0.866667	0	0.768421	0.000184191	FALSE	FALSE	0
cg05055073	1	17014081		0.9	0	0.868421	0	FALSE	FALSE	0
cg05057452	16	214970	HBM	0.852632	0	0.673684	0.00206967	FALSE	TRUE	0
cg05064044	6	292385	DUSP22;DUSP22	0.889474	0	0.426316	0.0701356	FALSE	TRUE	0
cg05073382	8	2045798	MYOM2	0.836842	0	0.84386	0	FALSE	TRUE	0
cg05083966	X	153185852	ARHGAP4;ARHGAP4	0.859649	0	0.72807	0.000601715	FALSE	FALSE	0
cg05086798	X	23350313		0.842105	0	0.898246	0	TRUE	FALSE	0
cg05091873	X	150067687	CD99L2;CD99L2;CD99L2	0.836842	0	0.836842	0	TRUE	FALSE	0
cg05096434	X	106243404	MORC4;MORC4;MORC4;MORC4	0.847368	0	0.749123	0.000337889	FALSE	FALSE	0
cg05099805	X	37967899	SYTL5;SYTL5;SYTL5	0.840351	0	0.749123	0.000337889	FALSE	FALSE	0
cg05123933	6	139017779		0.840351	0	0.763158	0.000219354	TRUE	FALSE	0
cg05130312	X	130930098	LOC286467	0.868421	0	0.738596	0.000455042	TRUE	FALSE	0
cg05134736	12	378771		0.850877	0	0.859649	0	TRUE	FALSE	0
cg05135828	X	142721385	SLITRK4	0.840351	0	0.780702	0.000118322	TRUE	FALSE	0
cg05137662	X	153461686	OPN1MW	0.854386	0	0.835088	0	FALSE	FALSE	0
cg05137809	10	80988604	ZMIZ1	0.866667	0	0.770175	0.000173456	FALSE	FALSE	0
cg05140643	1	143468880		0.847368	0	0.721053	0.000718586	FALSE	FALSE	0
cg05145435	X	50557436	SHROOM4;SHROOM4	0.866667	0	0.863158	0	FALSE	FALSE	0
cg05168419	X	38114129		0.873684	0	0.850877	0	FALSE	FALSE	0
cg05176970	17	724273	NXN	0.849123	0	0.8	5.08914e-05	TRUE	TRUE	0
cg05185504	X	119443687	FAM70A;FAM70A;FAM70A	0.84386	0	0.692982	0.00138008	FALSE	FALSE	0
cg05185776	X	55187570	FAM104B;FAM104B;FAM104B;FAM104B;FAM104B;FAM104B;FAM104B;FAM104B	0.852632	0	0.845614	0	FALSE	FALSE	0
cg05192017	12	115273077		0.9	0	0.801754	4.64892e-05	TRUE	FALSE	0
cg05193149	X	54556391	GNL3L;GNL3L	0.889474	0	0.803509	4.23294e-05	TRUE	FALSE	0
cg05194412	2	137003533		0.845614	0	0.821053	1.21192e-05	FALSE	TRUE	0
cg05222959	X	153665103	GDI1	0.840351	0	0.768421	0.000184191	FALSE	FALSE	0
cg05224614	5	154396783	KIF4B	0.838596	0	0.796491	6.04628e-05	FALSE	FALSE	0
cg05237260	9	44401998		0.880702	0	0.638596	0.00403132	FALSE	FALSE	0
cg05242066	X	129058725	UTP14A;UTP14A	0.896491	0	0.892982	0	FALSE	FALSE	0
cg05242815	X	25023562	ARX	0.866667	0	0.770175	0.000173456	TRUE	FALSE	0
cg05257947	X	11776394	MSL3;MSL3;MSL3;MSL3;MSL3	0.835088	0	0.784211	0.00010313	TRUE	FALSE	0
cg05259868	X	150344204	GPR50	0.857895	0	0.892982	0	FALSE	FALSE	0
cg05269167	1	205563162	MFSD4	0.903509	0	0.724561	0.000658097	FALSE	FALSE	0
cg05270750	16	90143788	PRDM7	0.891228	0	0.835088	0	FALSE	TRUE	0
cg05275182	16	29179176		0.849123	0	0.891228	0	FALSE	FALSE	0
cg05279330	13	26776254		0.863158	0	0.875439	0	TRUE	FALSE	0
cg05305760	X	70712563	INGX;BCYRN1	0.880702	0	0.829825	3.21707e-06	FALSE	FALSE	0
cg05316914	5	2575942		0.882456	0	0.603509	0.00730263	TRUE	FALSE	0
cg05327255	6	101294430	ASCC3;ASCC3	0.857895	0	0.892982	0	TRUE	FALSE	0
cg05342278	X	5327810		0.878947	0	0.808772	3.12119e-05	FALSE	FALSE	0
cg05345404	X	53468666		0.852632	0	0.792982	7.1125e-05	FALSE	FALSE	0
cg05347431	X	132547568	GPC4	0.863158	0	0.854386	0	FALSE	FALSE	0
cg05351360	8	95176562	CDH17;CDH17	0.852632	0	0.833333	5.45502e-07	TRUE	FALSE	0
cg05351887	16	3988869		0.87193	0	0.845614	0	FALSE	FALSE	0
cg05370638	X	37706736	DYNLT3	0.859649	0	0.77193	0.000163189	TRUE	FALSE	0
cg05371395	X	12156894	FRMPD4;FRMPD4	0.861404	0	0.714035	0.000852816	FALSE	FALSE	0
cg05374090	X	152864599	FAM58A;FAM58A;FAM58A;FAM58A	0.903509	0	0.812281	2.48466e-05	TRUE	FALSE	0
cg05392448	1	2266933	MORN1	0.873684	0	0.866667	0	TRUE	FALSE	0
cg05393297	12	53359155		0.835088	0	0.877193	0	FALSE	FALSE	0
cg05393861	3	52828628	ITIH3	0.840351	0	0.875439	0	TRUE	FALSE	0
cg05407200	11	93586725		0.9	0	0.87193	0	TRUE	FALSE	0
cg05414241	X	51240059	NUDT11	0.842105	0	0.808772	3.12119e-05	FALSE	FALSE	0
cg05416337	18	49865270	DCC	0.842105	0	0.875439	0	TRUE	FALSE	0
cg05425577	X	54522221	FGD1;FGD1	0.864912	0	0.778947	0.000126481	TRUE	FALSE	0
cg05435882	16	88311214		0.9	0	0.814035	2.19525e-05	FALSE	FALSE	0
cg05442715	X	23926141	CXorf58;CXorf58;CXorf58;APOO;APOO;CXorf58	0.864912	0	0.77193	0.000163189	FALSE	FALSE	0
cg05450979	16	10855738	NUBP1	0.840351	0	0.85614	0	TRUE	FALSE	0
cg05458412	6	9942625		0.864912	0	0.752632	0.000304546	FALSE	FALSE	0
cg05461361	X	154299395	MTCP1;MTCP1NB;BRCC3;MTCP1;BRCC3;MTCP1NB	0.85614	0	0.717544	0.000783412	TRUE	FALSE	0
cg05470791	X	151557718	GABRA3	0.840351	0	0.742105	0.000412963	FALSE	FALSE	0
cg05472874	22	44258179	SULT4A1	0.87193	0	0.789474	8.29641e-05	FALSE	FALSE	0
cg05474077	X	80457709	HMGN5;SH3BGRL	0.857895	0	0.684211	0.00166562	FALSE	FALSE	0
cg05477582	16	66600478	CMTM1;CMTM1;CMTM1;CMTM1;CMTM1;CMTM1;CMTM1;CMTM1	0.891228	0	0.875439	0	TRUE	FALSE	0
cg05479662	8	47347811		0.847368	0	0.826316	6.37252e-06	FALSE	FALSE	0
cg05480730	Y	7142073	PRKY	0.863158	0	0.798246	5.5546e-05	FALSE	FALSE	0
cg05486931	10	124380321	DMBT1;DMBT1;DMBT1	0.889474	0	0.752632	0.000304546	FALSE	FALSE	0
cg05491276	X	68836772	EDA;EDA;EDA;EDA;EDA;EDA;EDA	0.885965	0	0.785965	9.60713e-05	TRUE	FALSE	0
cg05513157	2	80101372	CTNNA2;CTNNA2	0.842105	0	0.663158	0.0025501	TRUE	FALSE	0
cg05518522	9	100507444		0.835088	0	0.84386	0	TRUE	FALSE	0
cg05519532	9	1989032		0.842105	0	0.796491	6.04628e-05	TRUE	FALSE	0
cg05525888	2	131451228		0.847368	0	0.919298	1.15358e-06	FALSE	FALSE	0
cg05530348	X	134558579	NCRNA00086	0.859649	0	0.894737	0	FALSE	FALSE	0
cg05536014	8	145856332	ARHGAP39	0.891228	0	0.882456	0	FALSE	FALSE	0
cg05536840	X	24511755	PDK3;PDK3	0.850877	0	0.878947	0	FALSE	FALSE	0
cg05539677	X	67940198	STARD8;STARD8;STARD8	0.885965	0	0.912281	0	FALSE	FALSE	0
cg05551025	X	110924355	ALG13;ALG13;ALG13;ALG13;ALG13;ALG13;ALG13;ALG13;ALG13;ALG13;ALG13;ALG13;ALG13;ALG13;ALG13;ALG13	0.864912	0	0.857895	0	FALSE	FALSE	0
cg05551578	X	133930791	FAM122B;FAM122B;FAM122B;FAM122B;FAM122C;FAM122B;FAM122B	0.868421	0	0.787719	8.93533e-05	TRUE	FALSE	0
cg05570109	2	39812572		0.845614	0	0.887719	0	TRUE	FALSE	0
cg05574272	5	33938213	RXFP3	0.838596	0	0.554386	0.0152372	FALSE	FALSE	0
cg05588334	10	38645346	HSD17B7P2	0.877193	0	0.766667	0.000195408	FALSE	FALSE	0
cg05594230	X	70712403	INGX;BCYRN1	0.878947	0	0.845614	0	TRUE	FALSE	0
cg05611160	9	103989475	LPPR1;LPPR1	0.850877	0	0.805263	3.84027e-05	TRUE	FALSE	0
cg05630320	X	133594116	HPRT1	0.891228	0	0.733333	0.000524361	FALSE	FALSE	0
cg05643303	12	54402714	HOXC8	0.840351	0	0.663158	0.0025501	FALSE	TRUE	0
cg05653481	11	67568593	LOC645332	0.835088	0	0.75614	0.000273778	FALSE	FALSE	0
cg05656210	5	141660565		0.845614	0	0.805263	3.84027e-05	TRUE	FALSE	0
cg05658928	18	82976		0.884211	0	0.808772	3.12119e-05	TRUE	FALSE	0
cg05666266	X	68725596	FAM155B	0.849123	0	0.821053	1.21192e-05	TRUE	FALSE	0
cg05672967	6	169256475		0.901754	0	0.933333	3.73951e-06	FALSE	TRUE	0
cg05680665	3	23635635	MIR548AC	0.880702	0	0.729825	0.000574995	TRUE	FALSE	0
cg05729118	22	24989054	GGT1;C22orf36	0.875439	0	0.794737	6.56523e-05	FALSE	FALSE	0
cg05742132	X	100240832	ARL13A;ARL13A;ARL13A	0.84386	0	0.817544	1.67023e-05	FALSE	FALSE	0
cg05746288	18	48405273	ME2;ME2	0.873684	0	0.882456	0	FALSE	FALSE	0
cg05747459	X	21393306	CNKSR2;CNKSR2;CNKSR2;CNKSR2	0.885965	0	0.768421	0.000184191	FALSE	FALSE	0
cg05764570	6	32726692	HLA-DQB2	0.84386	0	0.861404	0	FALSE	FALSE	0
cg05779406	7	1198841	ZFAND2A	0.842105	0	0.787719	8.93533e-05	TRUE	TRUE	0
cg05779595	13	112836631		0.84386	0	0.750877	0.000320886	FALSE	FALSE	0
cg05785542	8	1278754		0.87193	0	0.875439	0	FALSE	FALSE	0
cg05793108	X	118012978		0.854386	0	0.866667	0	FALSE	FALSE	0
cg05800723	4	79103126	FRAS1;FRAS1	0.840351	0	0.838596	0	FALSE	FALSE	0
cg05802560	22	24381773	GSTT1	0.898246	0	0.87193	0	FALSE	FALSE	0
cg05804863	15	79724519	KIAA1024	0.880702	0	0.882456	0	FALSE	FALSE	0
cg05806018	X	147582520	AFF2;AFF2;AFF2;AFF2;AFF2;AFF2;AFF2;AFF2;AFF2;AFF2	0.878947	0	0.831579	1.82368e-06	TRUE	FALSE	0
cg05808124	1	236514684		0.870175	0	0.815789	1.92403e-05	FALSE	TRUE	0
cg05809586	21	31709690	KRTAP27-1	0.861404	0	0.731579	0.000549219	TRUE	FALSE	0
cg05829338	X	106750612		0.908772	0	0.810526	2.79303e-05	FALSE	FALSE	0
cg05836256	16	1006052	LMF1	0.850877	0	0.692982	0.00138008	FALSE	FALSE	0
cg05843631	X	154275146	FUNDC2	0.870175	0	0.794737	6.56523e-05	FALSE	FALSE	0
cg05858354	3	75835938	ZNF717;ZNF717;ZNF717	0.884211	0	0.870175	0	FALSE	FALSE	0
cg05860920	X	11679501	ARHGAP6;ARHGAP6	0.842105	0	0.894737	0	FALSE	FALSE	0
cg05860956	12	312595	SLC6A12;SLC6A12;SLC6A12	0.850877	0	0.838596	0	FALSE	FALSE	0
cg05865243	Y	6114255	TSPY2	0.864912	0	0.74386	0.000393093	FALSE	FALSE	0
cg05874912	13	98530796		0.845614	0	0.817544	1.67023e-05	TRUE	FALSE	0
cg05887304	X	12809548	PRPS2;PRPS2;PRPS2;PRPS2	0.849123	0	0.766667	0.000195408	FALSE	FALSE	0
cg05889642	X	133931164	FAM122B;FAM122B;FAM122C;FAM122B;FAM122B;FAM122B;FAM122B;FAM122B;FAM122B	0.840351	0	0.880702	0	TRUE	FALSE	0
cg05890457	8	1905131	ARHGEF10	0.850877	0	0.861404	0	TRUE	FALSE	0
cg05891136	8	2014195	MYOM2	0.838596	0	0.885965	0	FALSE	FALSE	0
cg05894907	5	750226		0.857895	0	0.810526	2.79303e-05	FALSE	FALSE	0
cg05895137	8	133716144		0.887719	0	0.817544	1.67023e-05	TRUE	FALSE	0
cg05905814	X	150151809	HMGB3;HMGB3	0.842105	0	0.829825	3.21707e-06	FALSE	FALSE	0
cg05918124	1	108735713	SLC25A24;SLC25A24	0.894737	0	0.864912	0	TRUE	FALSE	0
cg05947181	X	50557283	SHROOM4;SHROOM4	0.849123	0	0.780702	0.000118322	TRUE	FALSE	0
cg05949379	21	15096626		0.84386	0	0.708772	0.000966054	FALSE	FALSE	0
cg05957603	22	41252784	XPNPEP3;ST13	0.898246	0	0.796491	6.04628e-05	FALSE	TRUE	0
cg05958126	X	19533458	MAP3K15	0.884211	0	0.796491	6.04628e-05	TRUE	FALSE	0
cg05961492	22	47459539	TBC1D22A;TBC1D22A;TBC1D22A;TBC1D22A;TBC1D22A	0.835088	0	0.682456	0.00172809	TRUE	FALSE	0
cg05991492	16	3988700		0.854386	0	0.763158	0.000219354	FALSE	FALSE	0
cg06010659	5	1634505	LOC728613	0.845614	0	0.812281	2.48466e-05	FALSE	TRUE	0
cg06012621	2	218296732	DIRC3	0.845614	0	0.877193	0	FALSE	FALSE	0
cg06012992	7	63032734		0.868421	0	0.817544	1.67023e-05	FALSE	TRUE	0
cg06023066	22	17515637		0.908772	0	0.842105	0	FALSE	FALSE	0
cg06025043	X	49132126	PPP1R3F;PPP1R3F	0.845614	0	0.814035	2.19525e-05	FALSE	FALSE	0
cg06027927	5	50259733		0.896491	0	0.745614	0.000373971	FALSE	FALSE	0
cg06030274	6	150307797		0.857895	0	0.840351	0	FALSE	TRUE	0
cg06051391	X	131352293	RAP2C	0.896491	0	0.701754	0.00113548	FALSE	FALSE	0
cg06059109	9	111806254	TMEM245	0.852632	0	0.6	0.0077233	FALSE	FALSE	0
cg06060457	22	43157042		0.894737	0	0.75614	0.000273778	TRUE	FALSE	0
cg06079963	X	24711994	POLA1	0.836842	0	0.791228	7.68918e-05	TRUE	FALSE	0
cg06084034	X	153637827	DNASE1L1;DNASE1L1;DNASE1L1;DNASE1L1	0.849123	0	0.782456	0.000110543	FALSE	FALSE	0
cg06092312	16	68345214	PRMT7;SLC7A6OS	0.859649	0	0.710526	0.000927047	FALSE	FALSE	0
cg06102971	X	17878442	RAI2	0.891228	0	0.791228	7.68918e-05	TRUE	FALSE	0
cg06105768	6	167732467		0.884211	0	0.67193	0.00214416	FALSE	FALSE	0
cg06126323	X	68836571	EDA;EDA;EDA;EDA;EDA;EDA	0.852632	0	0.778947	0.000126481	FALSE	FALSE	0
cg06127531	X	131770567	HS6ST2;HS6ST2	0.845614	0	0.808772	3.12119e-05	FALSE	FALSE	0
cg06143315	2	242950311		0.873684	0	0.831579	1.82368e-06	FALSE	FALSE	0
cg06156260	1	25292412	RUNX3	0.861404	0	0.885965	0	FALSE	TRUE	0
cg06157408	X	49090934	CCDC22;CACNA1F	0.847368	0	0.819298	1.4331e-05	FALSE	FALSE	0
cg06159667	X	103268258	H2BFWT;MIR1256	0.880702	0	0.84386	0	FALSE	FALSE	0
cg06178309	X	14048147	GEMIN8;GEMIN8;GEMIN8	0.864912	0	0.796491	6.04628e-05	FALSE	FALSE	0
cg06179179	7	158326758	MIR595;PTPRN2;PTPRN2;PTPRN2	0.864912	0	0.861404	0	FALSE	FALSE	0
cg06201763	11	111692181	ALG9;ALG9;ALG9;ALG9	0.842105	0	0.719298	0.000750442	FALSE	FALSE	0
cg06202470	12	11700489		0.907018	0	0.917544	7.99524e-07	FALSE	TRUE	0
cg06227268	Y	10008967		0.842105	0	0.833333	5.45502e-07	FALSE	FALSE	0
cg06230647	X	49392145		0.9	0	0.733333	0.000524361	FALSE	FALSE	0
cg06263672	7	65235340		0.84386	0	0.785965	9.60713e-05	FALSE	TRUE	0
cg06264882	2	233282380		0.854386	0	0.852632	0	TRUE	FALSE	0
cg06266461	X	153719192	SLC10A3;SLC10A3;SLC10A3	0.852632	0	0.831579	1.82368e-06	TRUE	FALSE	0
cg06269080	X	19003031	PHKA2	0.903509	0	0.836842	0	TRUE	FALSE	0
cg06295137	7	92102186		0.877193	0	0.826316	6.37252e-06	FALSE	FALSE	0
cg06295223	16	90143751	PRDM7	0.875439	0	0.826316	6.37252e-06	FALSE	TRUE	0
cg06300944	X	153141270	L1CAM;L1CAM;L1CAM	0.887719	0	0.698246	0.00122872	FALSE	FALSE	0
cg06304546	20	32448765		0.878947	0	0.824561	8.14662e-06	FALSE	TRUE	0
cg06314883	6	5404958	FARS2	0.864912	0	0.703509	0.00109104	TRUE	FALSE	0
cg06344265	11	120530973	GRIK4	0.891228	0	0.75614	0.000273778	TRUE	FALSE	0
cg06350107	X	38210221		0.9	0	0.889474	0	FALSE	FALSE	0
cg06352538	12	55368244	KIAA0748;KIAA0748	0.864912	0	0.708772	0.000966054	TRUE	FALSE	0
cg06352616	16	1493759	CCDC154	0.845614	0	0.770175	0.000173456	TRUE	FALSE	0
cg06358752	X	102531869	TCEAL5	0.84386	0	0.685965	0.00160499	FALSE	FALSE	0
cg06362582	7	37286864	ELMO1;ELMO1;ELMO1	0.849123	0	0.842105	0	FALSE	FALSE	0
cg06376033	X	102883934	TCEAL1;TCEAL1;TCEAL1;TCEAL1;TCEAL1	0.838596	0	0.798246	5.5546e-05	FALSE	FALSE	0
cg06379361	12	120755460		0.85614	0	0.847368	0	TRUE	TRUE	0
cg06380338	6	27861363	HIST1H2AM;HIST1H2BO	0.882456	0	0.875439	0	FALSE	FALSE	0
cg06388516	X	10588719	MID1;MID1;MID1;MID1	0.838596	0	0.74386	0.000393093	FALSE	FALSE	0
cg06393529	6	149027558		0.894737	0	0.919298	1.15358e-06	TRUE	FALSE	0
cg06403392	X	118739909	NKRF;NKRF	0.842105	0	0.794737	6.56523e-05	FALSE	FALSE	0
cg06408185	X	18443714	CDKL5	0.861404	0	0.703509	0.00109104	FALSE	FALSE	0
cg06411441	X	100307072	TRMT2B;TRMT2B;TRMT2B;TRMT2B;TRMT2B;TRMT2B;TRMT2B;TRMT2B	0.854386	0	0.754386	0.00028885	FALSE	FALSE	0
cg06430688	2	242490217		0.852632	0	0.838596	0	TRUE	FALSE	0
cg06437931	1	38180356		0.889474	0	0.880702	0	TRUE	FALSE	0
cg06452842	X	39633110		0.842105	0	0.807018	3.46999e-05	FALSE	FALSE	0
cg06464078	16	57541087		0.882456	0	0.868421	0	TRUE	FALSE	0
cg06467636	X	150905602	CNGA2	0.873684	0	0.815789	1.92403e-05	FALSE	FALSE	0
cg06469252	X	136113985	GPR101	0.910526	0	0.752632	0.000304546	FALSE	FALSE	0
cg06478886	5	135416029		0.861404	0	0.894737	0	FALSE	FALSE	0
cg06481993	4	120298494		0.866667	0	0.752632	0.000304546	FALSE	FALSE	0
cg06487085	1	219790221		0.836842	0	0.901754	0	TRUE	FALSE	0
cg06526366	9	114791149	MIR3134	0.910526	0	0.833333	5.45502e-07	TRUE	FALSE	0
cg06530638	2	70647901		0.908772	0	0.817544	1.67023e-05	FALSE	FALSE	0
cg06535290	16	85716163	GINS2	0.882456	0	0.777193	0.000135032	FALSE	FALSE	0
cg06536614	5	135416381	MIR886	0.887719	0	0.814035	2.19525e-05	FALSE	FALSE	0
cg06551391	X	51636562	MAGED1;MAGED1;MAGED1	0.882456	0	0.787719	8.93533e-05	FALSE	FALSE	0
cg06558166	X	132549003	GPC4;GPC4	0.875439	0	0.749123	0.000337889	TRUE	FALSE	0
cg06579087	X	23801291	SAT1;SAT1;SAT1	0.885965	0	0.766667	0.000195408	TRUE	FALSE	0
cg06590120	20	60520027		0.84386	0	0.803509	4.23294e-05	FALSE	FALSE	0
cg06615444	X	19533456	MAP3K15	0.852632	0	0.763158	0.000219354	TRUE	FALSE	0
cg06628622	X	34960829	FAM47B	0.905263	0	0.894737	0	FALSE	FALSE	0
cg06636270	Y	9173300	TTTY20	0.870175	0	0.878947	0	FALSE	TRUE	0
cg06643849	19	57742421	AURKC;AURKC;AURKC;AURKC;AURKC	0.885965	0	0.845614	0	FALSE	TRUE	0
cg06650546	X	136633004		0.845614	0	0.8	5.08914e-05	FALSE	FALSE	0
cg06650776	X	102632072	NGFRAP1;NGFRAP1;NGFRAP1	0.850877	0	0.74386	0.000393093	TRUE	FALSE	0
cg06650847	X	63004884		0.847368	0	0.824561	8.14662e-06	FALSE	FALSE	0
cg06673178	X	50557022	SHROOM4;SHROOM4;SHROOM4	0.866667	0	0.726316	0.000629407	TRUE	FALSE	0
cg06700462	X	19002006	PHKA2	0.849123	0	0.759649	0.00024543	FALSE	FALSE	0
cg06704717	X	73640484	SLC16A2	0.864912	0	0.729825	0.000574995	TRUE	FALSE	0
cg06718159	17	27338116		0.864912	0	0.766667	0.000195408	FALSE	FALSE	0
cg06728147	10	3200291	PITRM1;PITRM1;PITRM1	0.857895	0	0.650877	0.00322172	TRUE	FALSE	0
cg06734027	X	129474007	SLC25A14;SLC25A14;SLC25A14;SLC25A14;SLC25A14	0.889474	0	0.764912	0.000207123	TRUE	FALSE	0
cg06737308	4	185021514	ENPP6	0.835088	0	0.74386	0.000393093	FALSE	TRUE	0
cg06769752	X	153978839	GAB3;GAB3	0.835088	0	0.712281	0.000889312	TRUE	FALSE	0
cg06789340	6	26000384		0.854386	0	0.821053	1.21192e-05	FALSE	TRUE	0
cg06795995	5	56204613	SETD9;SETD9	0.873684	0	0.873684	0	FALSE	FALSE	0
cg06796116	12	6196183	VWF	0.882456	0	0.710526	0.000927047	TRUE	FALSE	0
cg06796204	X	71351792	NHSL2;RGAG4	0.838596	0	0.715789	0.000817526	TRUE	FALSE	0
cg06807018	X	119602917	LAMP2;LAMP2;LAMP2	0.884211	0	0.814035	2.19525e-05	TRUE	FALSE	0
cg06809923	6	169093117		0.891228	0	0.877193	0	TRUE	FALSE	0
cg06818555	X	20287610		0.849123	0	0.84386	0	FALSE	FALSE	0
cg06833284	16	54115828	FTO	0.87193	0	0.807018	3.46999e-05	TRUE	FALSE	0
cg06834235	X	48334621	FTSJ1;FTSJ1;FTSJ1;FTSJ1	0.849123	0	0.775439	0.000143992	TRUE	FALSE	0
cg06834998	4	74847824	PF4	0.877193	0	0.805263	3.84027e-05	FALSE	TRUE	0
cg06844213	16	29995217	TAOK2;TAOK2;TAOK2	0.845614	0	0.859649	0	TRUE	FALSE	0
cg06868414	18	56746125		0.845614	0	0.850877	0	TRUE	FALSE	0
cg06876079	X	35937780	CXorf22	0.868421	0	0.833333	5.45502e-07	FALSE	FALSE	0
cg06876321	6	26739605		0.880702	0	0.84386	0	FALSE	FALSE	0
cg06889571	10	1416791	ADARB2	0.836842	0	0.705263	0.00104802	FALSE	TRUE	0
cg06892295	10	84158395	NRG3;NRG3;NRG3	0.863158	0	0.863158	0	FALSE	FALSE	0
cg06895515	X	47050149	UBA1	0.868421	0	0.761404	0.000232117	FALSE	FALSE	0
cg06900776	X	100878107	ARMCX3;ARMCX3;ARMCX3	0.842105	0	0.794737	6.56523e-05	FALSE	FALSE	0
cg06902858	X	62975487	ARHGEF9;ARHGEF9;ARHGEF9	0.866667	0	0.807018	3.46999e-05	FALSE	FALSE	0
cg06907892	Y	14532343	GYG2P1	0.857895	0	0.782456	0.000110543	FALSE	FALSE	0
cg06922569	X	47420444	ARAF	0.835088	0	0.7	0.00118136	FALSE	FALSE	0
cg06928346	12	12849096	GPR19;GPR19	0.903509	0	0.8	5.08914e-05	FALSE	FALSE	0
cg06930309	1	65614045	AK4;AK4;AK4;AK4	0.842105	0	0.836842	0	FALSE	FALSE	0
cg06936709	X	83757476	HDX	0.84386	0	0.736842	0.000477298	TRUE	FALSE	0
cg06937348	6	31474185	MICB	0.838596	0	0.738596	0.000455042	FALSE	FALSE	0
cg06944050	X	118109068	LONRF3;LONRF3	0.892982	0	0.864912	0	FALSE	FALSE	0
cg06947608	10	128113825	C10orf90	0.868421	0	0.85614	0	FALSE	FALSE	0
cg06953293	10	62569076		0.838596	0	0.754386	0.00028885	FALSE	FALSE	0
cg06961873	1	25825780	TMEM57	0.868421	0	0.891228	0	TRUE	FALSE	0
cg06967228	X	68525725		0.835088	0	0.826316	6.37252e-06	FALSE	FALSE	0
cg06968171	X	152865298	LOC105373383;FAM58A;FAM58A	0.835088	0	0.810526	2.79303e-05	TRUE	FALSE	0
cg06971224	10	37106999		0.838596	0	0.819298	1.4331e-05	TRUE	FALSE	0
cg06983483	5	140998629	DIAPH1;DIAPH1	0.845614	0	0.733333	0.000524361	FALSE	FALSE	0
cg07001612	X	57936032	ZXDA	0.850877	0	0.766667	0.000195408	TRUE	FALSE	0
cg07007382	6	32578070		0.889474	0	0.782456	0.000110543	FALSE	FALSE	0
cg07010582	6	32046308	TNXB	0.868421	0	0.789474	8.29641e-05	TRUE	FALSE	0
cg07019225	16	86796319		0.861404	0	0.835088	0	TRUE	FALSE	0
cg07023501	7	155948572		0.891228	0	0.763158	0.000219354	FALSE	FALSE	0
cg07033961	5	760251		0.847368	0	0.663158	0.0025501	FALSE	FALSE	0
cg07037055	13	97499552		0.87193	0	0.845614	0	TRUE	FALSE	0
cg07042747	X	131158005	MST4;MST4;MST4	0.891228	0	0.801754	4.64892e-05	FALSE	FALSE	0
cg07049424	X	135959015	RBMX;RBMX;RBMX;RBMX	0.835088	0	0.801754	4.64892e-05	FALSE	FALSE	0
cg07057532	22	49801164		0.877193	0	0.892982	0	FALSE	FALSE	0
cg07061359	1	145303926	NBPF10;NBPF10;NBPF25P;NBPF25P;NBPF20;NBPF9;NBPF10;NBPF10	0.859649	0	0.707018	0.00100637	FALSE	FALSE	0
cg07064545	X	9001505	FAM9B	0.84386	0	0.819298	1.4331e-05	FALSE	FALSE	0
cg07070341	4	121844174	PRDM5	0.849123	0	0.477193	0.0405147	FALSE	FALSE	0
cg07076816	7	38351154		0.85614	0	0.575439	0.0112553	FALSE	FALSE	0
cg07091781	1	165415157	RXRG;RXRG	0.838596	0	0.719298	0.000750442	FALSE	FALSE	0
cg07099245	X	39954231	BCOR;BCOR;BCOR;BCOR	0.842105	0	0.822807	1.006e-05	FALSE	FALSE	0
cg07112531	6	42016695	CCND3;CCND3	0.840351	0	0.770175	0.000173456	FALSE	FALSE	0
cg07113474	2	176867125	KIAA1715;KIAA1715;KIAA1715;KIAA1715;KIAA1715;KIAA1715	0.903509	0	0.545614	0.0172008	FALSE	FALSE	0
cg07113537	3	16642858	DAZL;DAZL	0.84386	0	0.82807	4.73137e-06	TRUE	FALSE	0
cg07123865	14	67091047	GPHN;GPHN	0.836842	0	0.857895	0	TRUE	FALSE	0
cg07130381	10	44538622		0.896491	0	0.789474	8.29641e-05	TRUE	FALSE	0
cg07145234	9	123642351	PHF19	0.885965	0	0.701754	0.00113548	FALSE	FALSE	0
cg07148760	X	151124249	GABRE	0.842105	0	0.847368	0	FALSE	FALSE	0
cg07151902	X	40056513		0.9	0	0.777193	0.000135032	TRUE	FALSE	0
cg07158503	5	135415693		0.9	0	0.894737	0	FALSE	FALSE	0
cg07188591	1	148854315		0.887719	0	0.824561	8.14662e-06	FALSE	FALSE	0
cg07202869	5	171723771		0.884211	0	0.82807	4.73137e-06	FALSE	FALSE	0
cg07210229	16	88609890		0.870175	0	0.814035	2.19525e-05	TRUE	FALSE	0
cg07220777	15	86708338	AGBL1	0.849123	0	0.712281	0.000889312	FALSE	FALSE	0
cg07240846	10	12438782	CAMK1D;CAMK1D	0.877193	0	0.85614	0	TRUE	FALSE	0
cg07249765	7	4244643	SDK1;SDK1	0.894737	0	0.722807	0.000687814	TRUE	FALSE	0
cg07258983	18	42255459		0.880702	0	0.905263	0	TRUE	FALSE	0
cg07262858	X	72223384	PABPC1L2B-AS1;PABPC1L2B;PABPC1L2B	0.854386	0	0.873684	0	FALSE	FALSE	0
cg07279178	16	22217694	EEF2K;EEF2K	0.878947	0	0.845614	0	FALSE	TRUE	0
cg07284314	12	51581006	POU6F1;POU6F1	0.850877	0	0.873684	0	FALSE	FALSE	0
cg07303247	13	101192361		0.908772	0	0.901754	0	FALSE	FALSE	0
cg07307460	22	21899163		0.875439	0	0.82807	4.73137e-06	FALSE	FALSE	0
cg07314384	2	132218291	RNU6-81P	0.864912	0	0.877193	0	FALSE	FALSE	0
cg07318076	10	23634319	C10orf67	0.859649	0	0.75614	0.000273778	FALSE	FALSE	0
cg07319199	2	69273285	ANTXR1;ANTXR1;ANTXR1	0.892982	0	0.822807	1.006e-05	TRUE	FALSE	0
cg07335343	5	78829309		0.9	0	0.719298	0.000750442	TRUE	FALSE	0
cg07345257	X	109308305	TMEM164;TMEM164	0.84386	0	0.807018	3.46999e-05	FALSE	FALSE	0
cg07348308	X	67937799	STARD8;STARD8;STARD8	0.838596	0	0.736842	0.000477298	FALSE	FALSE	0
cg07365741	6	170478434		0.873684	0	0.72807	0.000601715	TRUE	FALSE	0
cg07368951	X	62570953	SPIN4;SPIN4	0.85614	0	0.742105	0.000412963	FALSE	FALSE	0
cg07381502	X	40440191	ATP6AP2	0.877193	0	0.787719	8.93533e-05	FALSE	FALSE	0
cg07382899	X	128789004	APLN	0.885965	0	0.8	5.08914e-05	TRUE	FALSE	0
cg07386410	X	55515751	USP51	0.896491	0	0.831579	1.82368e-06	TRUE	FALSE	0
cg07394404	1	218458485	RRP15	0.854386	0	0.787719	8.93533e-05	FALSE	FALSE	0
cg07399866	X	152100361	ZNF185;ZNF185;ZNF185;ZNF185;ZNF185;ZNF185;ZNF185	0.845614	0	0.698246	0.00122872	FALSE	FALSE	0
cg07414487	6	31107186	PSORS1C1;PSORS1C2	0.885965	0	0.901754	0	TRUE	FALSE	0
cg07416344	13	114872599	RASA3	0.875439	0	0.87193	0	FALSE	TRUE	0
cg07416455	18	44543612	TCEB3CL;KATNAL2	0.905263	0	0.789474	8.29641e-05	FALSE	TRUE	0
cg07439872	X	136114890	GPR101	0.905263	0	0.849123	0	FALSE	FALSE	0
cg07456585	14	74704714	VSX2	0.863158	0	0.801754	4.64892e-05	TRUE	FALSE	0
cg07463743	X	39863342		0.859649	0	0.784211	0.00010313	FALSE	FALSE	0
cg07464524	X	106960206	TSC22D3;TSC22D3;TSC22D3;TSC22D3	0.873684	0	0.780702	0.000118322	FALSE	FALSE	0
cg07466166	X	77395088	TAF9B	0.845614	0	0.722807	0.000687814	FALSE	FALSE	0
cg07481066	Y	21704081		0.880702	0	0.824561	8.14662e-06	TRUE	FALSE	0
cg07482223	6	30899233	SFTA2	0.898246	0	0.905263	0	TRUE	FALSE	0
cg07484678	1	227103412		0.85614	0	0.815789	1.92403e-05	TRUE	FALSE	0
cg07488092	16	85309889		0.840351	0	0.889474	0	TRUE	FALSE	0
cg07496966	X	15758924	CA5B	0.852632	0	0.896491	0	FALSE	FALSE	0
cg07507776	X	57618914	ZXDB	0.891228	0	0.778947	0.000126481	TRUE	FALSE	0
cg07511789	X	53122617	KANTR	0.873684	0	0.714035	0.000852816	FALSE	FALSE	0
cg07516457	X	70585931	TAF1;BCYRN1;TAF1	0.842105	0	0.747368	0.000355578	TRUE	FALSE	0
cg07533249	17	34450758		0.84386	0	0.852632	0	FALSE	FALSE	0
cg07549474	X	141293862	MAGEC2	0.838596	0	0.792982	7.1125e-05	FALSE	FALSE	0
cg07553115	X	107976167	IRS4	0.866667	0	0.868421	0	TRUE	FALSE	0
cg07564979	6	32451079		0.849123	0	0.9	0	TRUE	FALSE	0
cg07590102	X	18460454	CDKL5;CDKL5	0.892982	0	0.873684	0	FALSE	FALSE	0
cg07594244	X	24330930	SUPT20HL2	0.847368	0	0.808772	3.12119e-05	FALSE	FALSE	0
cg07629996	X	17673876	NHS;NHS	0.835088	0	0.814035	2.19525e-05	TRUE	FALSE	0
cg07640670	1	110156211	GNAT2	0.85614	0	0.82807	4.73137e-06	TRUE	FALSE	0
cg07645761	16	2892518	TMPRSS8	0.866667	0	0.896491	0	FALSE	TRUE	0
cg07646083	2	65640057	SPRED2	0.905263	0	0.880702	0	TRUE	FALSE	0
cg07653728	X	152939309	PNCK;PNCK	0.852632	0	0.698246	0.00122872	FALSE	FALSE	0
cg07653885	17	131827	RPH3AL;RPH3AL;RPH3AL;RPH3AL	0.9	0	0.726316	0.000629407	TRUE	FALSE	0
cg07681512	X	118827369	SEPT6;SEPT6;SEPT6;SEPT6	0.863158	0	0.75614	0.000273778	FALSE	FALSE	0
cg07686944	X	17755642	SCML1;SCML1;SCML1;SCML1;SCML1;SCML1;SCML1;SCML1	0.845614	0	0.798246	5.5546e-05	FALSE	FALSE	0
cg07693301	X	150067249	CD99L2;CD99L2;CD99L2	0.849123	0	0.684211	0.00166562	FALSE	FALSE	0
cg07711085	20	61877875	NKAIN4	0.873684	0	0.831579	1.82368e-06	TRUE	FALSE	0
cg07753967	20	29611652	FRG1B	0.880702	0	0.736842	0.000477298	FALSE	TRUE	0
cg07757575	X	40922702		0.835088	0	0.789474	8.29641e-05	FALSE	FALSE	0
cg07770093	X	136115530		0.849123	0	0.752632	0.000304546	FALSE	FALSE	0
cg07773740	22	20631270		0.889474	0	0.829825	3.21707e-06	TRUE	FALSE	0
cg07779826	X	103268686	H2BFWT;MIR1256	0.842105	0	0.826316	6.37252e-06	FALSE	FALSE	0
cg07780887	X	73325165	NCRNA00182	0.836842	0	0.831579	1.82368e-06	FALSE	FALSE	0
cg07791065	6	113786051		0.864912	0	0.701754	0.00113548	TRUE	FALSE	0
cg07791427	12	54402704	HOXC8	0.907018	0	0.622807	0.00530932	FALSE	FALSE	0
cg07792002	X	48319438	SLC38A5	0.845614	0	0.885965	0	FALSE	FALSE	0
cg07795413	Y	16733930	NLGN4Y;NLGN4Y;NLGN4Y;NLGN4Y;NLGN4Y	0.866667	0	0.808772	3.12119e-05	FALSE	FALSE	0
cg07806343	X	129194523		0.836842	0	0.807018	3.46999e-05	TRUE	FALSE	0
cg07825508	X	100645891	RPL36A	0.836842	0	0.729825	0.000574995	FALSE	FALSE	0
cg07826058	X	21857614	MBTPS2	0.891228	0	0.859649	0	TRUE	FALSE	0
cg07830469	X	68385467	PJA1;PJA1;PJA1	0.892982	0	0.815789	1.92403e-05	FALSE	FALSE	0
cg07858069	X	21958690	SMS	0.870175	0	0.719298	0.000750442	FALSE	FALSE	0
cg07861180	X	129066829		0.903509	0	0.785965	9.60713e-05	TRUE	FALSE	0
cg07874334	X	122993913	XIAP	0.889474	0	0.778947	0.000126481	FALSE	FALSE	0
cg07881342	X	112087556		0.842105	0	0.754386	0.00028885	FALSE	FALSE	0
cg07896193	X	106449457	NUP62CL;CXorf41;CXorf41	0.838596	0	0.72807	0.000601715	FALSE	FALSE	0
cg07910525	X	51075582	NUDT10	0.838596	0	0.752632	0.000304546	FALSE	FALSE	0
cg07914169	X	69698950	DLG3;DLG3;DLG3	0.838596	0	0.931579	3.44351e-06	FALSE	FALSE	0
cg07916137	X	70712411	INGX;TAF1;BCYRN1;TAF1;TAF1;TAF1;TAF1;TAF1;TAF1;TAF1;TAF1;TAF1	0.84386	0	0.424561	0.0713908	FALSE	FALSE	0
cg07929499	X	109154898		0.84386	0	0.784211	0.00010313	FALSE	FALSE	0
cg07930217	X	106871770	PRPS1;PRPS1	0.847368	0	0.731579	0.000549219	FALSE	FALSE	0
cg07934435	X	153200807	NAA10;NAA10;NAA10;RENBP	0.875439	0	0.764912	0.000207123	FALSE	FALSE	0
cg07939587	Y	2657936		0.884211	0	0.945614	5.56152e-06	FALSE	FALSE	0
cg07940380	X	67653182	OPHN1;OPHN1	0.868421	0	0.801754	4.64892e-05	TRUE	FALSE	0
cg07960942	X	71130741	NHSL2	0.857895	0	0.735088	0.000500396	FALSE	FALSE	0
cg07997370	16	34443120		0.875439	0	0.664912	0.00246427	FALSE	FALSE	0
cg08000746	7	143729843		0.845614	0	0.845614	0	FALSE	FALSE	0
cg08014527	12	73196857		0.857895	0	0.903509	0	FALSE	FALSE	0
cg08024264	17	75084281	SCARNA16;C17orf86	0.910526	0	0.733333	0.000524361	TRUE	FALSE	0
cg08035479	8	58172643		0.849123	0	0.861404	0	FALSE	FALSE	0
cg08039008	3	195717366	SDHAP1	0.845614	0	0.857895	0	FALSE	FALSE	0
cg08041448	6	29648901		0.868421	0	0.84386	0	FALSE	FALSE	0
cg08071329	6	170555857		0.878947	0	0.74386	0.000393093	FALSE	FALSE	0
cg08076861	X	152599398	ZNF275	0.836842	0	0.74386	0.000393093	TRUE	FALSE	0
cg08084154	16	2848577	TESSP1	0.863158	0	0.759649	0.00024543	FALSE	TRUE	0
cg08084429	10	126229822	LHPP;LHPP	0.880702	0	0.875439	0	TRUE	FALSE	0
cg08087512	X	153990886	DKC1;DKC1	0.836842	0	0.785965	9.60713e-05	TRUE	FALSE	0
cg08093211	X	100075588	CSTF2	0.877193	0	0.74386	0.000393093	FALSE	FALSE	0
cg08103472	15	40731325		0.857895	0	0.803509	4.23294e-05	TRUE	FALSE	0
cg08108619	X	84499351	ZNF711	0.891228	0	0.814035	2.19525e-05	TRUE	FALSE	0
cg08112003	8	7774161		0.861404	0	0.773684	0.000153372	TRUE	FALSE	0
cg08129505	19	15582687	PGLYRP2	0.882456	0	0.868421	0	FALSE	TRUE	0
cg08138245	17	78231489		0.847368	0	0.82807	4.73137e-06	TRUE	FALSE	0
cg08141822	X	73470028	FTX	0.838596	0	0.833333	5.45502e-07	FALSE	FALSE	0
cg08143045	1	171807195		0.840351	0	0.684211	0.00166562	TRUE	TRUE	0
cg08147831	X	128977722	ZDHHC9;ZDHHC9;ZDHHC9	0.854386	0	0.780702	0.000118322	TRUE	FALSE	0
cg08156396	X	135991445		0.87193	0	0.729825	0.000574995	FALSE	FALSE	0
cg08157084	10	27001461	PDSS1	0.882456	0	0.833333	5.45502e-07	TRUE	FALSE	0
cg08170293	16	12667646	SNX29	0.852632	0	0.754386	0.00028885	FALSE	FALSE	0
cg08179155	4	132646574		0.849123	0	0.854386	0	FALSE	TRUE	0
cg08195522	X	73512305	NCRNA00182	0.887719	0	0.84386	0	FALSE	FALSE	0
cg08209743	X	25030802	ARX	0.878947	0	0.705263	0.00104802	FALSE	FALSE	0
cg08225398	13	45563328	KIAA1704;NUFIP1	0.875439	0	0.817544	1.67023e-05	FALSE	TRUE	0
cg08225549	8	80550161	STMN2	0.840351	0	0.775439	0.000143992	TRUE	FALSE	0
cg08227081	3	122643357	SEMA5B;SEMA5B;SEMA5B;SEMA5B;SEMA5B	0.854386	0	0.785965	9.60713e-05	FALSE	FALSE	0
cg08238319	5	404713	AHRR;LOC100310782	0.838596	0	0.75614	0.000273778	TRUE	FALSE	0
cg08242338	Y	6114379	TSPY2	0.863158	0	0.721053	0.000718586	FALSE	FALSE	0
cg08242633	8	2591411		0.861404	0	0.496491	0.0322937	FALSE	FALSE	0
cg08261807	X	133304356	MIR20B;MIR363;MIR106A;MIR18B;MIR19B2;MIR92A2	0.850877	0	0.882456	0	FALSE	FALSE	0
cg08268333	3	66380744	SLC25A26;SLC25A26;SLC25A26	0.847368	0	0.914035	7.57378e-08	TRUE	FALSE	0
cg08279423	X	67919438	STARD8;STARD8;STARD8	0.838596	0	0.912281	0	FALSE	FALSE	0
cg08279496	X	133370993	CCDC160	0.852632	0	0.722807	0.000687814	FALSE	FALSE	0
cg08289148	X	66920286	AR;AR	0.838596	0	0.842105	0	TRUE	FALSE	0
cg08296461	9	129175987	MVB12B	0.840351	0	0.766667	0.000195408	TRUE	FALSE	0
cg08298085	X	77166237	ATP7A;ATP7A	0.857895	0	0.752632	0.000304546	TRUE	FALSE	0
cg08303228	X	133676400	MIR542	0.847368	0	0.750877	0.000320886	FALSE	FALSE	0
cg08310519	11	86305199	ME3;ME3;ME3	0.878947	0	0.745614	0.000373971	TRUE	TRUE	0
cg08324927	20	47044835		0.885965	0	0.914035	7.57378e-08	TRUE	FALSE	0
cg08340716	X	50648356	LOC347376	0.840351	0	0.801754	4.64892e-05	FALSE	FALSE	0
cg08343300	X	70712742	BCYRN1;INGX	0.840351	0	0.821053	1.21192e-05	TRUE	FALSE	0
cg08358587	X	100603709	TIMM8A;TIMM8A;TIMM8A	0.861404	0	0.680702	0.00179245	FALSE	FALSE	0
cg08394893	5	6106677		0.880702	0	0.77193	0.000163189	TRUE	FALSE	0
cg08395784	4	708242	PCGF3	0.866667	0	0.708772	0.000966054	TRUE	FALSE	0
cg08408091	X	153672393	FAM50A	0.868421	0	0.685965	0.00160499	TRUE	FALSE	0
cg08408543	4	92014350	CCSER1	0.84386	0	0.717544	0.000783412	FALSE	FALSE	0
cg08413188	Y	6742378	AMELY	0.840351	0	0.757895	0.000259311	FALSE	FALSE	0
cg08417382	X	153775328	IKBKG;G6PD;G6PD;IKBKG;IKBKG;IKBKG	0.850877	0	0.773684	0.000153372	TRUE	FALSE	0
cg08422514	X	153775441	G6PD;G6PD;IKBKG;IKBKG;IKBKG;IKBKG	0.842105	0	0.761404	0.000232117	FALSE	FALSE	0
cg08432583	2	91874634		0.835088	0	0.657895	0.00282231	FALSE	FALSE	0
cg08446187	X	154299289	MTCP1;MTCP1NB;BRCC3;MTCP1;BRCC3;MTCP1NB	0.854386	0	0.747368	0.000355578	TRUE	FALSE	0
cg08456124	X	11442350	ARHGAP6;ARHGAP6	0.835088	0	0.775439	0.000143992	FALSE	FALSE	0
cg08477332	1	153590243	S100A14	0.891228	0	0.775439	0.000143992	TRUE	TRUE	0
cg08479516	7	158905536	VIPR2	0.85614	0	0.887719	0	FALSE	FALSE	0
cg08489109	6	132297508		0.885965	0	0.807018	3.46999e-05	TRUE	FALSE	0
cg08490762	10	13502224	BEND7;BEND7	0.877193	0	0.845614	0	FALSE	FALSE	0
cg08501265	2	91777282		0.894737	0	0.926316	2.50634e-06	FALSE	FALSE	0
cg08522473	3	111730545	TAGLN3;TAGLN3;TAGLN3	0.892982	0	0.778947	0.000126481	TRUE	FALSE	0
cg08573069	X	105066049	NRK	0.891228	0	0.759649	0.00024543	FALSE	FALSE	0
cg08573404	X	120296170		0.889474	0	0.880702	0	FALSE	FALSE	0
cg08583823	X	153599824	FLNA;FLNA	0.87193	0	0.67193	0.00214416	FALSE	FALSE	0
cg08588626	X	17393327	NHS	0.85614	0	0.766667	0.000195408	FALSE	FALSE	0
cg08588839	X	71341375	NHSL2	0.836842	0	0.833333	5.45502e-07	FALSE	FALSE	0
cg08598426	8	3233426	CSMD1	0.9	0	0.692982	0.00138008	FALSE	FALSE	0
cg08622041	X	48644252	GATA1	0.894737	0	0.854386	0	FALSE	FALSE	0
cg08627233	X	153236954	TMEM187;HCFC1	0.9	0	0.740351	0.000433605	TRUE	FALSE	0
cg08632164	7	65971372		0.868421	0	0.849123	0	FALSE	TRUE	0
cg08657228	20	170641	DEFB128	0.896491	0	0.8	5.08914e-05	FALSE	FALSE	0
cg08660994	14	93697774		0.87193	0	0.752632	0.000304546	FALSE	FALSE	0
cg08664054	X	100916283	ARMCX2;ARMCX2	0.847368	0	0.692982	0.00138008	FALSE	FALSE	0
cg08669168	4	53757661	SCFD2	0.850877	0	0.714035	0.000852816	FALSE	FALSE	0
cg08677398	8	58056175		0.840351	0	0.803509	4.23294e-05	FALSE	TRUE	0
cg08711005	1	9596358		0.894737	0	0.735088	0.000500396	TRUE	FALSE	0
cg08718119	12	9436621	LOC642846	0.889474	0	0.821053	1.21192e-05	FALSE	TRUE	0
cg08739628	7	6886759		0.854386	0	0.863158	0	FALSE	FALSE	0
cg08745965	5	135416529	MIR886	0.857895	0	0.885965	0	FALSE	FALSE	0
cg08776296	7	134856544	C7orf49;C7orf49;C7orf49;C7orf49;C7orf49;C7orf49;C7orf49	0.850877	0	0.729825	0.000574995	TRUE	FALSE	0
cg08778598	5	1594579	SDHAP3	0.878947	0	0.842105	0	FALSE	FALSE	0
cg08778881	X	102565993	BEX2;BEX2;BEX2;BEX2	0.835088	0	0.814035	2.19525e-05	TRUE	FALSE	0
cg08785871	7	1530505	INTS1	0.866667	0	0.712281	0.000889312	FALSE	FALSE	0
cg08819256	2	129109442		0.847368	0	0.796491	6.04628e-05	FALSE	FALSE	0
cg08822578	13	21559615	LATS2	0.873684	0	0.882456	0	FALSE	TRUE	0
cg08835041	19	37461278		0.878947	0	0.905263	0	FALSE	FALSE	0
cg08860596	1	149717620		0.84386	0	0.75614	0.000273778	FALSE	FALSE	0
cg08874821	X	46405125	ZNF674;LOC401588;ZNF674	0.877193	0	0.792982	7.1125e-05	TRUE	FALSE	0
cg08880082	14	90165664		0.840351	0	0.67193	0.00214416	FALSE	FALSE	0
cg08880261	21	43547872	UMODL1;UMODL1	0.863158	0	0.789474	8.29641e-05	TRUE	FALSE	0
cg08889373	1	6454109	ACOT7	0.884211	0	0.698246	0.00122872	FALSE	FALSE	0
cg08894280	13	99500700	DOCK9;DOCK9	0.892982	0	0.794737	6.56523e-05	TRUE	FALSE	0
cg08900396	17	149582	RPH3AL	0.845614	0	0.787719	8.93533e-05	TRUE	FALSE	0
cg08902358	X	135229362	FHL1;FHL1;FHL1;FHL1;FHL1	0.864912	0	0.812281	2.48466e-05	TRUE	FALSE	0
cg08904058	15	29859427	FAM189A1	0.892982	0	0.807018	3.46999e-05	FALSE	TRUE	0
cg08905118	X	46696426	RP2;RP2	0.849123	0	0.787719	8.93533e-05	FALSE	FALSE	0
cg08906643	X	130886574	FIRRE	0.835088	0	0.717544	0.000783412	TRUE	FALSE	0
cg08906898	20	34319899	RBM39;RBM39	0.864912	0	0.838596	0	FALSE	FALSE	0
cg08914944	16	1349928		0.835088	0	0.52807	0.0217395	FALSE	FALSE	0
cg08916839	5	415575	AHRR	0.868421	0	0.780702	0.000118322	TRUE	TRUE	0
cg08938749	X	138774306	MCF2;MCF2	0.908772	0	0.775439	0.000143992	FALSE	FALSE	0
cg08951186	16	88290370		0.908772	0	0.873684	0	FALSE	FALSE	0
cg08959724	X	134552827		0.864912	0	0.889474	0	FALSE	FALSE	0
cg08975641	2	189959552	COL5A2	0.882456	0	0.654386	0.00301662	FALSE	FALSE	0
cg09010232	X	48056531	SSX5;SSX5	0.877193	0	0.866667	0	FALSE	FALSE	0
cg09027495	15	78159351		0.882456	0	0.873684	0	FALSE	FALSE	0
cg09038535	X	54209715	FAM120C	0.878947	0	0.785965	9.60713e-05	FALSE	FALSE	0
cg09045429	20	55569898		0.864912	0	0.870175	0	TRUE	FALSE	0
cg09055214	X	152915087	DUSP9	0.875439	0	0.859649	0	FALSE	FALSE	0
cg09056691	X	154033836	MPP1;MPP1;MPP1;MPP1	0.857895	0	0.745614	0.000373971	TRUE	FALSE	0
cg09069294	22	18740268		0.866667	0	0.819298	1.4331e-05	FALSE	FALSE	0
cg09070199	X	62570990	SPIN4;SPIN4	0.845614	0	0.705263	0.00104802	FALSE	FALSE	0
cg09091181	X	108976749	ACSL4;ACSL4	0.885965	0	0.759649	0.00024543	TRUE	FALSE	0
cg09094710	2	11356189	ROCK2	0.892982	0	0.896491	0	TRUE	FALSE	0
cg09125754	2	130886714	POTEF;POTEF	0.910526	0	0.838596	0	FALSE	FALSE	0
cg09126835	X	47148789		0.861404	0	0.887719	0	FALSE	FALSE	0
cg09136023	1	16934807	NBPF1	0.861404	0	0.885965	0	FALSE	FALSE	0
cg09144828	5	172988196		0.85614	0	0.787719	8.93533e-05	FALSE	FALSE	0
cg09145046	X	39251536	LINC01282	0.836842	0	0.842105	0	FALSE	FALSE	0
cg09152401	12	9436616	LOC642846	0.910526	0	0.857895	0	FALSE	FALSE	0
cg09163457	X	152909014	DUSP9	0.838596	0	0.712281	0.000889312	TRUE	FALSE	0
cg09172820	13	21050174	CRYL1	0.854386	0	0.670175	0.00222081	FALSE	FALSE	0
cg09183404	X	99891932	TSPAN6;TSPAN6;TSPAN6;TSPAN6;TSPAN6;TSPAN6;TSPAN6;TSPAN6	0.889474	0	0.915789	4.40065e-07	FALSE	FALSE	0
cg09222696	X	153237363	TMEM187;HCFC1	0.847368	0	0.675439	0.00199731	FALSE	FALSE	0
cg09223632	Y	10033460		0.850877	0	0.850877	0	FALSE	FALSE	0
cg09231170	4	3812267		0.845614	0	0.82807	4.73137e-06	FALSE	FALSE	0
cg09231482	X	154493497	RAB39B	0.840351	0	0.747368	0.000355578	TRUE	FALSE	0
cg09232346	1	6741234	DNAJC11	0.859649	0	0.238596	0.323791	FALSE	FALSE	0
cg09235203	22	22657522	BMS1P20	0.836842	0	0.721053	0.000718586	FALSE	FALSE	0
cg09238847	X	119764273	C1GALT1C1;C1GALT1C1	0.868421	0	0.807018	3.46999e-05	FALSE	FALSE	0
cg09243735	2	215674664	BARD1	0.847368	0	0.659649	0.00272906	FALSE	FALSE	0
cg09278708	X	101905837	GPRASP1;GPRASP1;GPRASP1	0.84386	0	0.757895	0.000259311	TRUE	FALSE	0
cg09285672	X	48980142	GPKOW	0.885965	0	0.810526	2.79303e-05	FALSE	FALSE	0
cg09297252	8	7631214		0.864912	0	0.696491	0.0012776	FALSE	FALSE	0
cg09309899	X	148586967	IDS;IDS;IDS	0.842105	0	0.761404	0.000232117	TRUE	FALSE	0
cg09317036	8	144635547	GSDMD	0.847368	0	0.680702	0.00179245	FALSE	TRUE	0
cg09328330	2	243030638	LOC728323;LOC728323;LOC728323;LOC728323	0.838596	0	0.742105	0.000412963	FALSE	FALSE	0
cg09331190	6	158390146		0.910526	0	0.877193	0	TRUE	FALSE	0
cg09342610	X	135333415	MAP7D3	0.894737	0	0.738596	0.000455042	FALSE	FALSE	0
cg09350919	Y	9365070	TSPY3;TSPY4	0.850877	0	0.861404	0	FALSE	FALSE	0
cg09354738	X	73513143	NCRNA00182	0.85614	0	0.810526	2.79303e-05	TRUE	FALSE	0
cg09391136	5	177398433		0.836842	0	0.833333	5.45502e-07	FALSE	FALSE	0
cg09392819	2	26568944	SELI;GPR113	0.842105	0	0.747368	0.000355578	FALSE	FALSE	0
cg09399550	3	150496342		0.892982	0	0.896491	0	FALSE	FALSE	0
cg09404119	5	565486		0.880702	0	0.949123	5.99822e-06	FALSE	FALSE	0
cg09428674	2	1518668	TPO;TPO;TPO;TPO;TPO;TPO	0.884211	0	0.877193	0	TRUE	FALSE	0
cg09432349	6	156737659		0.850877	0	0.619298	0.00563401	FALSE	FALSE	0
cg09434603	5	499552	SLC9A3	0.870175	0	0.864912	0	TRUE	FALSE	0
cg09438069	4	187581093	FAT1	0.868421	0	0.794737	6.56523e-05	TRUE	FALSE	0
cg09456260	5	134356061		0.857895	0	0.787719	8.93533e-05	TRUE	FALSE	0
cg09460490	13	113829357		0.868421	0	0.819298	1.4331e-05	FALSE	FALSE	0
cg09466685	X	152875961		0.854386	0	0.836842	0	TRUE	FALSE	0
cg09517734	6	111284222	GTF3C6	0.847368	0	0.847368	0	FALSE	FALSE	0
cg09525227	X	103500030	ESX1	0.87193	0	0.778947	0.000126481	TRUE	FALSE	0
cg09541777	X	144712707		0.847368	0	0.82807	4.73137e-06	FALSE	FALSE	0
cg09562461	15	40324728	EIF2AK4	0.877193	0	0.749123	0.000337889	TRUE	FALSE	0
cg09584492	19	36265674	ARHGAP33;ARHGAP33	0.852632	0	0.689474	0.0014891	FALSE	FALSE	0
cg09614279	X	84189578	UBE2DNL	0.852632	0	0.901754	0	FALSE	FALSE	0
cg09628704	9	98514400		0.884211	0	0.835088	0	FALSE	TRUE	0
cg09647814	X	77166125	ATP7A;ATP7A;ATP7A	0.866667	0	0.764912	0.000207123	FALSE	FALSE	0
cg09654329	4	3413614	RGS12;RGS12;RGS12	0.864912	0	0.917544	7.99524e-07	FALSE	FALSE	0
cg09696884	20	42844219	OSER1-AS1;OSER1-AS1;OSER1-AS1	0.842105	0	0.798246	5.5546e-05	FALSE	FALSE	0
cg09700325	X	153060147	SSR4;SSR4;IDH3G;IDH3G;SSR4;SSR4;SSR4;SSR4;SSR4	0.884211	0	0.738596	0.000455042	FALSE	FALSE	0
cg09703824	X	107976020	IRS4	0.842105	0	0.712281	0.000889312	FALSE	FALSE	0
cg09714315	2	149310951		0.835088	0	0.84386	0	TRUE	FALSE	0
cg09727210	7	2962240	CARD11	0.903509	0	0.896491	0	TRUE	FALSE	0
cg09728865	Y	6780027	TBL1Y;TBL1Y;TBL1Y	0.875439	0	0.875439	0	FALSE	FALSE	0
cg09732456	X	153669976	GDI1;GDI1	0.892982	0	0.759649	0.00024543	FALSE	FALSE	0
cg09734952	X	13671285	TCEANC	0.863158	0	0.780702	0.000118322	FALSE	FALSE	0
cg09743261	X	71458871	ERCC6L;PIN4	0.840351	0	0.819298	1.4331e-05	FALSE	FALSE	0
cg09759458	19	480216		0.868421	0	0.814035	2.19525e-05	FALSE	TRUE	0
cg09764916	X	148843651		0.854386	0	0.829825	3.21707e-06	FALSE	FALSE	0
cg09768654	X	153046386	SRPK3;SRPK3;SRPK3	0.861404	0	0.752632	0.000304546	TRUE	FALSE	0
cg09768983	4	183935060		0.838596	0	0.842105	0	FALSE	TRUE	0
cg09775918	9	46844296	LOC103908605	0.898246	0	0.857895	0	FALSE	FALSE	0
cg09796146	16	33937240		0.882456	0	0.529825	0.0212465	FALSE	FALSE	0
cg09805660	X	118340202		0.840351	0	0.898246	0	FALSE	FALSE	0
cg09854620	10	131930596		0.866667	0	0.814035	2.19525e-05	TRUE	FALSE	0
cg09863225	X	48335010	FTSJ1;FTSJ1;FTSJ1	0.859649	0	0.738596	0.000455042	FALSE	FALSE	0
cg09864671	20	61565484	DIDO1;DIDO1;DIDO1	0.835088	0	0.87193	0	FALSE	FALSE	0
cg09885922	X	40401622		0.850877	0	0.868421	0	FALSE	FALSE	0
cg09898573	Y	14100824		0.9	0	0.878947	0	TRUE	FALSE	0
cg09908042	15	102025217	PCSK6;PCSK6;PCSK6;PCSK6;PCSK6;PCSK6;PCSK6;PCSK6	0.842105	0	0.882456	0	TRUE	FALSE	0
cg09912589	X	112067795	AMOT;AMOT	0.892982	0	0.757895	0.000259311	FALSE	FALSE	0
cg09950034	X	122994069	XIAP;XIAP	0.884211	0	0.889474	0	FALSE	FALSE	0
cg09966745	X	71934213	PHKA1;PHKA1	0.85614	0	0.780702	0.000118322	TRUE	FALSE	0
cg09978401	X	12809216	PRPS2;PRPS2	0.836842	0	0.784211	0.00010313	TRUE	FALSE	0
cg09981999	X	53120031		0.894737	0	0.889474	0	FALSE	FALSE	0
cg09985794	3	184374361		0.840351	0	0.912281	0	TRUE	FALSE	0
cg09991056	X	107682966	COL4A5;COL4A5;COL4A6;COL4A6;COL4A5	0.838596	0	0.901754	0	TRUE	FALSE	0
cg10000492	8	15496541	TUSC3;TUSC3	0.882456	0	0.722807	0.000687814	FALSE	FALSE	0
cg10007938	2	134821131		0.852632	0	0.836842	0	FALSE	TRUE	0
cg10018576	X	9580062	TBL1X;TBL1X;TBL1X;TBL1X	0.836842	0	0.764912	0.000207123	FALSE	FALSE	0
cg10025778	7	76877115	CCDC146	0.847368	0	0.852632	0	FALSE	FALSE	0
cg10039267	X	39960821	BCOR;BCOR	0.889474	0	0.784211	0.00010313	TRUE	FALSE	0
cg10044179	21	15352983	C21orf81	0.878947	0	0.852632	0	FALSE	TRUE	0
cg10048986	12	49631720		0.835088	0	0.887719	0	FALSE	TRUE	0
cg10051493	16	1939295		0.875439	0	0.87193	0	TRUE	FALSE	0
cg10052190	16	22019676	C16orf52	0.864912	0	0.801754	4.64892e-05	FALSE	TRUE	0
cg10052922	X	138276904	FGF13;FGF13;FGF13	0.850877	0	0.759649	0.00024543	FALSE	FALSE	0
cg10055173	X	49028100	PLP2	0.840351	0	0.807018	3.46999e-05	FALSE	FALSE	0
cg10062460	1	213071444	FLVCR1	0.863158	0	0.814035	2.19525e-05	TRUE	FALSE	0
cg10070668	X	18693585		0.889474	0	0.763158	0.000219354	FALSE	FALSE	0
cg10096008	1	16943843		0.854386	0	0.845614	0	FALSE	FALSE	0
cg10105294	9	44402430	LOC103908605	0.880702	0	0.875439	0	FALSE	FALSE	0
cg10107975	X	33744556		0.907018	0	0.8	5.08914e-05	FALSE	FALSE	0
cg10146330	22	50482250	TTLL8	0.896491	0	0.903509	0	TRUE	FALSE	0
cg10146853	X	148628940	CXorf40A;CXorf40A;CXorf40A;CXorf40A	0.878947	0	0.857895	0	FALSE	FALSE	0
cg10147298	12	109017697	SELPLG;SELPLG	0.87193	0	0.498246	0.0316174	FALSE	FALSE	0
cg10148189	X	24694933		0.898246	0	0.901754	0	FALSE	FALSE	0
cg10169915	X	69417166	DGAT2L6	0.854386	0	0.814035	2.19525e-05	FALSE	FALSE	0
cg10193727	7	5851500		0.908772	0	0.880702	0	FALSE	FALSE	0
cg10196665	X	13671523	TCEANC	0.863158	0	0.715789	0.000817526	FALSE	FALSE	0
cg10197734	X	15692787	CA5BP	0.850877	0	0.84386	0	FALSE	FALSE	0
cg10202835	5	25190672		0.873684	0	0.62807	0.00485109	TRUE	FALSE	0
cg10213302	Y	2802975	ZFY;ZFY;ZFY	0.845614	0	0.766667	0.000195408	TRUE	FALSE	0
cg10222683	2	201374906	KCTD18	0.85614	0	0.829825	3.21707e-06	FALSE	FALSE	0
[truncated: 13,610 more rows]

## Sheet: BRvsBLadj_BH
Supplementary Table S4. Characteristics of the CpGs that surpassed the Benjamini-Hochberg level of significance for the degree of correlation between brain and peripheral tissues.
[truncated: 13,064 more rows]

[truncated: 2 more sheets: BRvsSAadj_BH, BRvsEPadj_BH]
